# Supplementary material
Source: MDPI journal article supplement (https://www.mdpi.com/2075-5309/9/10/209)
Supplement: s1 [file s1]

## Sheet: Tabelle1
Figure 3						Figure 5							Figure 6a				Figure 6b				Figure 7a							Figure 7b							Figure 7c							Figure 7d
													Air Temperaures conditioned Room				Air Temperaures maintenance room				Ceiling							Floor							Maintenace Room wall							Partition wall
Maintenace room and external air temerature, heating modes						Extrenal Air							Measurement	Simulation			Measurement	Simulation			Measurement			Simulation				Measurement			Simulation				Measurement West			Simulation				Measurement			Simulation
Tm	T Ex	high power	low power	HVAC		Floor	East	West	Roof	ΔT max			Tm Cond. Room	T Cond. Sim	ΔT		T maint. Room	T maint. Sim	ΔT		T38	T37	T36	Isol_In	Isol_Core	Isol_Ex		T33	T32	T31	Isol_In	Isol_Core	Isol_Ex		T43	T42	T41	Isol_In	Isol_Core	Isol_Ex		T83	T82	T81	Isol_In	Isol_Core	Isol_Ex
11.4461	9	0	0	0		9	8.875	9	9.25	0.375			11.4461	12.035	-0.588857		11.812	11.887	-0.075		11.25	10.75	9.062	12.024	10.672	9.018		11.375	10.437	9.25	12.022	10.698	9.27		11.437	10.375	8.937	12.021	10.67	9.126		11.5	11.875	11.812	12.107	12.003	11.865
11.455	9	0	0	0		9	8.937	9	9.25	0.313			11.455	12.035	-0.58		11.812	11.887	-0.075		11.25	10.75	9.062	12.024	10.672	9.007		11.375	10.437	9.25	12.022	10.698	9.269		11.437	10.375	8.937	12.02	10.67	9.116		11.5	11.875	11.812	12.107	12.003	11.865
11.4371	8.937	0	0	0		8.937	8.812	9	9.25	0.438			11.4371	12.034	-0.596857		11.812	11.887	-0.075		11.25	10.75	9.062	12.023	10.672	8.992		11.375	10.437	9.25	12.021	10.698	9.268		11.437	10.375	8.937	12.02	10.67	9.106		11.5	11.875	11.812	12.107	12.003	11.866
11.4461	8.937	0	0	0		8.937	8.812	8.937	9.25	0.438			11.4461	12.033	-0.586857		11.812	11.887	-0.075		11.25	10.75	9.062	12.023	10.672	8.978		11.375	10.437	9.25	12.021	10.698	9.267		11.437	10.375	8.937	12.019	10.67	9.096		11.5	11.875	11.812	12.106	12.003	11.866
11.455	8.937	0	0	0		8.937	8.812	8.937	9.187	0.375			11.455	12.033	-0.578		11.75	11.887	-0.137		11.25	10.75	9.062	12.022	10.671	8.963		11.375	10.437	9.25	12.02	10.698	9.266		11.437	10.375	8.937	12.019	10.67	9.087		11.5	11.875	11.812	12.106	12.003	11.866
11.455	8.875	0	0	0		8.875	8.812	8.937	9.187	0.375			11.455	12.032	-0.577		11.812	11.888	-0.076		11.25	10.75	9.062	12.022	10.671	8.957		11.375	10.437	9.25	12.02	10.698	9.265		11.437	10.375	8.937	12.018	10.67	9.079		11.5	11.875	11.812	12.105	12.003	11.866
11.4461	8.937	0	0	0		8.937	8.812	8.937	9.187	0.375			11.4461	12.032	-0.585857		11.812	11.888	-0.076		11.25	10.75	9.062	12.022	10.671	8.954		11.375	10.437	9.25	12.02	10.698	9.264		11.437	10.375	8.875	12.018	10.67	9.072		11.5	11.875	11.812	12.105	12.003	11.867
11.455	8.937	0	0	0		8.937	8.812	8.937	9.187	0.375			11.455	12.031	-0.576		11.812	11.888	-0.076		11.25	10.75	9	12.021	10.671	8.951		11.375	10.437	9.25	12.019	10.698	9.262		11.437	10.375	8.875	12.018	10.67	9.066		11.5	11.875	11.812	12.105	12.003	11.867
11.455	8.937	0	0	0		8.937	8.812	8.937	9.187	0.375			11.455	12.031	-0.576		11.812	11.888	-0.076		11.25	10.75	9	12.021	10.671	8.949		11.375	10.437	9.25	12.019	10.698	9.261		11.437	10.375	8.875	12.017	10.67	9.059		11.5	11.875	11.812	12.104	12.003	11.867
11.455	8.937	0	0	0		8.937	8.812	8.937	9.187	0.375			11.455	12.03	-0.575		11.812	11.888	-0.076		11.25	10.75	9	12.02	10.671	8.946		11.375	10.437	9.25	12.018	10.698	9.259		11.437	10.375	8.875	12.017	10.67	9.053		11.5	11.875	11.812	12.104	12.002	11.867
11.455	8.937	0	0	0		8.937	8.812	8.937	9.187	0.375			11.455	12.03	-0.575		11.812	11.889	-0.077		11.25	10.75	9	12.02	10.671	8.944		11.375	10.437	9.25	12.018	10.698	9.258		11.437	10.375	8.875	12.016	10.67	9.046		11.562	11.875	11.812	12.103	12.002	11.867
11.455	8.937	0	0	0		8.937	8.812	8.937	9.187	0.375			11.455	12.029	-0.574		11.812	11.889	-0.077		11.25	10.75	9	12.019	10.671	8.941		11.375	10.437	9.25	12.017	10.698	9.256		11.437	10.375	8.875	12.016	10.67	9.039		11.5	11.875	11.812	12.103	12.002	11.868
11.455	8.937	0	0	0		8.937	8.875	8.937	9.187	0.312			11.455	12.029	-0.574		11.812	11.889	-0.077		11.25	10.75	9	12.019	10.671	8.938		11.375	10.437	9.25	12.017	10.697	9.255		11.437	10.375	8.875	12.015	10.67	9.033		11.5	11.875	11.812	12.103	12.002	11.868
11.455	8.937	0	0	0		8.937	8.875	8.937	9.187	0.312			11.455	12.028	-0.573		11.812	11.889	-0.077		11.25	10.75	9	12.018	10.671	8.942		11.375	10.437	9.25	12.016	10.697	9.253		11.437	10.375	8.875	12.015	10.67	9.029		11.5	11.875	11.812	12.102	12.002	11.868
11.455	9	0	0	0		9	8.875	9	9.187	0.312			11.455	12.028	-0.573		11.812	11.889	-0.077		11.25	10.75	8.937	12.018	10.671	8.951		11.375	10.437	9.25	12.016	10.697	9.252		11.437	10.375	8.875	12.014	10.67	9.029		11.5	11.875	11.812	12.102	12.002	11.868
11.455	9	0	0	0		9	8.875	9	9.187	0.312			11.455	12.027	-0.572		11.812	11.89	-0.078		11.25	10.75	8.937	12.017	10.671	8.96		11.375	10.437	9.25	12.016	10.697	9.25		11.437	10.375	8.875	12.014	10.669	9.029		11.5	11.875	11.812	12.101	12.002	11.868
11.455	9	0	0	0		9	8.875	9	9.187	0.312			11.455	12.027	-0.572		11.812	11.89	-0.078		11.25	10.75	8.937	12.017	10.671	8.969		11.375	10.437	9.25	12.015	10.697	9.248		11.437	10.375	8.875	12.014	10.669	9.029		11.5	11.875	11.812	12.101	12.002	11.869
11.455	9	0	0	0		9	8.875	9	9.187	0.312			11.455	12.027	-0.572		11.812	11.89	-0.078		11.25	10.75	8.937	12.017	10.671	8.978		11.375	10.437	9.25	12.015	10.697	9.247		11.5	10.375	8.937	12.013	10.669	9.029		11.5	11.875	11.812	12.1	12.002	11.869
11.455	9	0	0	0		9	8.937	9	9.187	0.25			11.455	12.026	-0.571		11.812	11.89	-0.078		11.25	10.75	8.937	12.016	10.671	8.987		11.375	10.437	9.25	12.014	10.697	9.245		11.437	10.375	8.875	12.013	10.669	9.029		11.5	11.875	11.812	12.1	12.002	11.869
11.455	9	0	0	0		9	8.937	9	9.187	0.25			11.455	12.026	-0.571		11.812	11.89	-0.078		11.25	10.75	8.937	12.016	10.671	8.996		11.375	10.437	9.25	12.014	10.697	9.243		11.5	10.375	8.937	12.012	10.669	9.029		11.562	11.875	11.812	12.1	12.001	11.869
11.455	9	0	0	0		9	8.937	9	9.187	0.25			11.455	12.025	-0.57		11.812	11.891	-0.079		11.25	10.75	8.937	12.015	10.671	9.005		11.375	10.437	9.25	12.013	10.697	9.242		11.437	10.375	8.875	12.012	10.669	9.029		11.562	11.875	11.812	12.099	12.001	11.87
11.455	9	0	0	0		9	8.937	9	9.187	0.25			11.455	12.025	-0.57		11.812	11.891	-0.079		11.25	10.75	8.937	12.015	10.671	9.014		11.375	10.437	9.25	12.013	10.697	9.24		11.5	10.375	8.937	12.011	10.669	9.03		11.562	11.875	11.812	12.099	12.001	11.87
11.455	9	0	0	0		9	8.937	9	9.125	0.188			11.455	12.025	-0.57		11.812	11.891	-0.079		11.25	10.75	8.937	12.014	10.671	9.024		11.375	10.437	9.25	12.012	10.697	9.239		11.437	10.375	8.937	12.011	10.669	9.034		11.562	11.875	11.812	12.098	12.001	11.87
11.455	9	0	0	0		9	8.937	9	9.125	0.188			11.455	12.024	-0.569		11.812	11.891	-0.079		11.25	10.75	8.875	12.014	10.671	9.034		11.375	10.437	9.25	12.012	10.697	9.237		11.437	10.375	8.937	12.01	10.669	9.038		11.5	11.875	11.812	12.098	12.001	11.87
11.455	9	0	0	0		9	8.937	9	9.125	0.188			11.455	12.024	-0.569		11.812	11.892	-0.08		11.25	10.75	8.875	12.013	10.67	9.043		11.375	10.437	9.25	12.011	10.697	9.236		11.437	10.375	8.937	12.01	10.669	9.042		11.5	11.875	11.812	12.098	12.001	11.87
11.455	9	0	0	0		9	8.937	9	9.125	0.188			11.455	12.024	-0.569		11.812	11.892	-0.08		11.25	10.75	8.875	12.013	10.67	9.053		11.375	10.437	9.25	12.011	10.696	9.234		11.5	10.375	8.937	12.01	10.669	9.045		11.562	11.875	11.812	12.097	12.001	11.871
11.455	9	0	0	0		9	8.937	9	9.125	0.188			11.455	12.023	-0.568		11.812	11.892	-0.08		11.25	10.75	8.875	12.013	10.67	9.063		11.375	10.437	9.25	12.011	10.696	9.233		11.5	10.375	8.937	12.009	10.669	9.049		11.562	11.875	11.812	12.097	12.001	11.871
11.4639	9	0	0	0		9	8.937	9	9.125	0.188			11.4639	12.023	-0.559143		11.812	11.892	-0.08		11.312	10.75	8.875	12.012	10.67	9.073		11.375	10.437	9.25	12.01	10.696	9.232		11.5	10.375	8.937	12.009	10.669	9.053		11.562	11.875	11.812	12.096	12.001	11.871
11.455	9	0	0	0		9	8.937	9.062	9.125	0.188			11.455	12.023	-0.568		11.812	11.893	-0.081		11.25	10.75	8.875	12.012	10.67	9.082		11.375	10.437	9.25	12.01	10.696	9.23		11.5	10.375	8.937	12.008	10.669	9.057		11.562	11.875	11.812	12.096	12.001	11.871
11.455	9.062	0	0	0		9.062	8.937	9.062	9.125	0.188			11.455	12.022	-0.567		11.812	11.893	-0.081		11.25	10.75	8.875	12.011	10.67	9.09		11.375	10.437	9.25	12.009	10.696	9.229		11.437	10.375	8.937	12.008	10.669	9.06		11.562	11.875	11.812	12.096	12	11.871
11.455	9.062	0	0	0		9.062	8.937	9.062	9.125	0.188			11.455	12.022	-0.567		11.812	11.893	-0.081		11.25	10.75	8.875	12.011	10.67	9.087		11.375	10.437	9.25	12.009	10.696	9.228		11.5	10.375	8.937	12.007	10.669	9.059		11.562	11.875	11.812	12.095	12	11.872
11.455	9.062	0	0	0		9.062	8.937	9.062	9.125	0.188			11.455	12.022	-0.567		11.75	11.893	-0.143		11.25	10.75	8.875	12.01	10.67	9.083		11.375	10.437	9.25	12.008	10.696	9.227		11.5	10.375	8.937	12.007	10.669	9.058		11.562	11.875	11.812	12.095	12	11.872
11.455	9.062	0	0	0		9.062	8.937	9.062	9.125	0.188			11.455	12.021	-0.566		11.812	11.893	-0.081		11.25	10.75	8.875	12.01	10.67	9.079		11.375	10.437	9.25	12.008	10.696	9.225		11.5	10.375	8.937	12.006	10.669	9.058		11.562	11.875	11.812	12.094	12	11.872
11.464	9.062	0	0	0		9.062	8.937	9.062	9.125	0.188			11.464	12.021	-0.557		11.812	11.893	-0.081		11.25	10.75	8.875	12.009	10.67	9.076		11.375	10.437	9.25	12.007	10.696	9.224		11.5	10.375	8.937	12.006	10.669	9.057		11.562	11.875	11.812	12.094	12	11.872
11.455	9.062	0	0	0		9.062	8.937	9.062	9.125	0.188			11.455	12.02	-0.565		11.812	11.894	-0.082		11.25	10.75	8.875	12.009	10.67	9.072		11.375	10.437	9.25	12.007	10.696	9.223		11.437	10.375	8.937	12.006	10.668	9.056		11.562	11.875	11.812	12.094	12	11.872
11.455	9	0	0	0		9	8.937	9.062	9.125	0.188			11.455	12.02	-0.565		11.812	11.894	-0.082		11.25	10.75	8.875	12.009	10.67	9.068		11.375	10.437	9.25	12.007	10.696	9.222		11.5	10.375	8.937	12.005	10.668	9.055		11.562	11.875	11.812	12.093	12	11.873
11.455	9	0	0	0		9	8.875	9.062	9.125	0.25			11.455	12.019	-0.564		11.75	11.894	-0.144		11.312	10.75	8.875	12.008	10.67	9.065		11.375	10.437	9.25	12.006	10.696	9.221		11.5	10.375	8.937	12.005	10.668	9.055		11.562	11.875	11.812	12.093	12	11.873
11.464	9	0	0	0		9	8.875	9	9.125	0.25			11.464	12.019	-0.555		11.75	11.894	-0.144		11.25	10.75	8.875	12.008	10.669	9.061		11.375	10.437	9.187	12.006	10.696	9.22		11.5	10.375	8.937	12.004	10.668	9.054		11.562	11.875	11.812	12.092	12	11.873
11.464	9	0	0	0		9	8.875	9	9.125	0.25			11.464	12.018	-0.554		11.812	11.894	-0.082		11.25	10.75	8.875	12.007	10.669	9.058		11.375	10.437	9.25	12.005	10.695	9.219		11.5	10.375	8.937	12.004	10.668	9.053		11.562	11.875	11.812	12.092	12	11.873
11.455	9	0	0	0		9	8.875	9	9.125	0.25			11.455	12.018	-0.563		11.812	11.895	-0.083		11.25	10.75	8.875	12.007	10.669	9.054		11.375	10.437	9.25	12.005	10.695	9.218		11.5	10.375	8.937	12.003	10.668	9.052		11.562	11.875	11.812	12.092	11.999	11.873
11.464	9	0	0	0		9	8.875	9	9.125	0.25			11.464	12.017	-0.553		11.812	11.895	-0.083		11.312	10.75	8.812	12.006	10.669	9.05		11.375	10.437	9.25	12.004	10.695	9.217		11.5	10.375	8.937	12.003	10.668	9.051		11.562	11.875	11.812	12.091	11.999	11.874
11.464	9	0	0	0		9	8.937	9	9.062	0.125			11.464	12.017	-0.553		11.812	11.895	-0.083		11.312	10.75	8.812	12.006	10.669	9.047		11.375	10.437	9.25	12.004	10.695	9.216		11.5	10.375	8.875	12.002	10.668	9.051		11.562	11.875	11.812	12.091	11.999	11.874
11.473	9	0	0	0		9	8.937	9.062	9.062	0.125			11.473	12.016	-0.543		11.812	11.895	-0.083		11.25	10.75	8.812	12.005	10.669	9.043		11.375	10.437	9.25	12.003	10.695	9.214		11.5	10.375	8.937	12.002	10.668	9.05		11.562	11.875	11.812	12.09	11.999	11.874
11.455	9	0	0	0		9	8.937	9.062	9.062	0.125			11.455	12.016	-0.561		11.812	11.895	-0.083		11.312	10.75	8.812	12.005	10.669	9.039		11.375	10.437	9.187	12.003	10.695	9.213		11.5	10.375	8.937	12.002	10.668	9.049		11.562	11.875	11.812	12.09	11.999	11.874
11.464	9	0	0	0		9	8.937	9.062	9.062	0.125			11.464	12.015	-0.551		11.812	11.895	-0.083		11.25	10.75	8.812	12.005	10.669	9.036		11.375	10.437	9.25	12.003	10.695	9.212		11.5	10.375	8.937	12.001	10.668	9.048		11.562	11.875	11.812	12.09	11.999	11.874
11.464	9	0	0	0		9	8.937	9.062	9.062	0.125			11.464	12.015	-0.551		11.812	11.896	-0.084		11.312	10.75	8.812	12.004	10.669	9.032		11.375	10.437	9.187	12.002	10.695	9.211		11.5	10.375	8.937	12.001	10.668	9.048		11.562	11.875	11.812	12.089	11.999	11.875
11.464	9	0	0	0		9	8.937	9.062	9.062	0.125			11.464	12.015	-0.551		11.812	11.896	-0.084		11.312	10.75	8.812	12.004	10.669	9.033		11.375	10.437	9.187	12.002	10.695	9.21		11.5	10.375	8.937	12	10.668	9.049		11.562	11.875	11.812	12.089	11.999	11.875
11.455	9	0	0	0		9	8.937	9.062	9.062	0.125			11.455	12.014	-0.559		11.812	11.896	-0.084		11.25	10.75	8.812	12.003	10.669	9.036		11.375	10.437	9.187	12.001	10.695	9.21		11.5	10.375	8.937	12	10.668	9.05		11.562	11.875	11.812	12.088	11.999	11.875
11.464	9	0	0	0		9	8.937	9.062	9.062	0.125			11.464	12.014	-0.55		11.75	11.896	-0.146		11.312	10.75	8.812	12.003	10.669	9.039		11.375	10.437	9.187	12.001	10.695	9.209		11.5	10.375	8.875	11.999	10.667	9.051		11.562	11.875	11.812	12.088	11.999	11.875
11.473	9	0	0	0		9	8.937	9.062	9.062	0.125			11.473	12.013	-0.54		11.812	11.896	-0.084		11.312	10.75	8.812	12.002	10.668	9.042		11.437	10.437	9.187	12	10.695	9.208		11.5	10.375	8.937	11.999	10.667	9.053		11.562	11.875	11.812	12.087	11.998	11.875
11.464	9	0	0	0		9	8.937	9.062	9	0.125			11.464	12.013	-0.549		11.812	11.897	-0.085		11.312	10.75	8.812	12.002	10.668	9.045		11.375	10.437	9.187	12	10.695	9.207		11.5	10.375	8.937	11.998	10.667	9.054		11.562	11.875	11.812	12.087	11.998	11.876
11.455	9	0	0	0		9	8.937	9.062	9.062	0.125			11.455	12.013	-0.558		11.812	11.897	-0.085		11.312	10.75	8.812	12.001	10.668	9.048		11.375	10.437	9.187	11.999	10.694	9.207		11.5	10.375	8.937	11.998	10.667	9.056		11.562	11.875	11.812	12.087	11.998	11.876
11.4819	9	0	0	0		9	8.937	9.062	9	0.125			11.4819	12.012	-0.530143		11.812	11.897	-0.085		11.312	10.75	8.812	12.001	10.668	9.051		11.375	10.437	9.187	11.999	10.694	9.206		11.5	10.375	8.937	11.998	10.667	9.057		11.562	11.875	11.812	12.086	11.998	11.876
11.4729	9	0	0	0		9	8.937	9.062	9	0.125			11.4729	12.012	-0.539143		11.812	11.897	-0.085		11.312	10.75	8.75	12	10.668	9.054		11.375	10.437	9.187	11.999	10.694	9.205		11.5	10.375	8.937	11.997	10.667	9.059		11.562	11.875	11.812	12.086	11.998	11.876
11.4729	9	0	0	0		9	8.937	9.062	9	0.125			11.4729	12.011	-0.538143		11.812	11.898	-0.086		11.312	10.75	8.75	12	10.668	9.057		11.375	10.437	9.187	11.998	10.694	9.205		11.5	10.375	8.937	11.997	10.667	9.06		11.562	11.875	11.812	12.085	11.998	11.876
11.4729	9	0	0	0		9	8.937	9.062	9	0.125			11.4729	12.011	-0.538143		11.812	11.898	-0.086		11.312	10.75	8.75	12	10.668	9.06		11.375	10.437	9.187	11.998	10.694	9.204		11.5	10.375	8.937	11.996	10.667	9.062		11.562	11.875	11.812	12.085	11.998	11.877
11.464	9	0	0	0		9	8.937	9.062	9	0.125			11.464	12.011	-0.547		11.75	11.898	-0.148		11.312	10.75	8.75	11.999	10.668	9.063		11.437	10.437	9.187	11.997	10.694	9.203		11.5	10.375	8.937	11.996	10.667	9.063		11.562	11.875	11.812	12.085	11.998	11.877
11.464	9	0	0	0		9	8.937	9	9	0.063			11.464	12.01	-0.546		11.812	11.898	-0.086		11.312	10.75	8.75	11.999	10.668	9.066		11.375	10.437	9.187	11.997	10.694	9.202		11.5	10.375	8.937	11.995	10.667	9.065		11.562	11.875	11.812	12.084	11.998	11.877
11.473	9	0	0	0		9	8.937	9.062	9	0.125			11.473	12.01	-0.537		11.812	11.898	-0.086		11.312	10.75	8.75	11.998	10.668	9.069		11.375	10.437	9.187	11.996	10.694	9.202		11.5	10.375	8.937	11.995	10.667	9.066		11.562	11.875	11.812	12.084	11.998	11.877
11.482	9.062	0	0	0		9.062	8.937	9.062	9	0.125			11.482	12.009	-0.527		11.812	11.899	-0.087		11.312	10.75	8.75	11.998	10.667	9.072		11.437	10.437	9.187	11.996	10.694	9.201		11.5	10.375	8.937	11.995	10.666	9.067		11.562	11.875	11.75	12.083	11.997	11.877
11.473	9.062	0	0	0		9.062	8.937	9.062	9	0.125			11.473	12.009	-0.536		11.812	11.899	-0.087		11.312	10.75	8.75	11.997	10.667	9.075		11.437	10.437	9.187	11.995	10.694	9.2		11.5	10.375	8.937	11.994	10.666	9.069		11.562	11.875	11.812	12.083	11.997	11.878
11.473	9	0	0	0		9	8.937	9.062	9	0.125			11.473	12.009	-0.536		11.75	11.899	-0.149		11.312	10.75	8.75	11.997	10.667	9.078		11.437	10.437	9.187	11.995	10.694	9.199		11.5	10.375	8.937	11.994	10.666	9.07		11.562	11.875	11.812	12.083	11.997	11.878
11.473	9.062	0	0	0		9.062	9	9.062	9.062	0.062			11.473	12.008	-0.535		11.75	11.899	-0.149		11.312	10.75	8.75	11.996	10.667	9.078		11.375	10.437	9.187	11.995	10.694	9.199		11.5	10.375	8.937	11.993	10.666	9.071		11.562	11.875	11.812	12.082	11.997	11.878
11.4729	9.062	0	0	0		9.062	9	9.062	9	0.062			11.4729	12.008	-0.535143		11.75	11.899	-0.149		11.312	10.75	8.75	11.996	10.667	9.075		11.437	10.437	9.187	11.994	10.694	9.198		11.5	10.375	8.937	11.993	10.666	9.07		11.562	11.875	11.812	12.082	11.997	11.878
11.473	9.062	0	0	0		9.062	9	9.062	9	0.062			11.473	12.007	-0.534		11.75	11.9	-0.15		11.312	10.75	8.75	11.996	10.667	9.072		11.375	10.437	9.187	11.994	10.693	9.197		11.5	10.375	8.937	11.992	10.666	9.068		11.562	11.875	11.812	12.081	11.997	11.878
11.4819	9	0	0	0		9	9	9.062	9	0.062			11.4819	12.007	-0.525143		11.812	11.9	-0.088		11.312	10.75	8.75	11.995	10.667	9.069		11.375	10.437	9.187	11.993	10.693	9.197		11.5	10.375	8.937	11.992	10.666	9.067		11.562	11.875	11.75	12.081	11.997	11.879
11.482	9	0	0	0		9	8.937	9.062	9	0.125			11.482	12.006	-0.524		11.75	11.9	-0.15		11.312	10.75	8.75	11.995	10.667	9.066		11.437	10.437	9.187	11.993	10.693	9.196		11.5	10.375	8.937	11.991	10.666	9.066		11.562	11.875	11.75	12.081	11.997	11.879
11.473	9.062	0	0	0		9.062	9	9.062	9	0.062			11.473	12.006	-0.533		11.812	11.9	-0.088		11.312	10.75	8.75	11.994	10.666	9.063		11.437	10.437	9.187	11.992	10.693	9.195		11.5	10.375	8.937	11.991	10.666	9.065		11.562	11.875	11.812	12.08	11.997	11.879
11.482	9.062	0	0	0		9.062	9	9.062	9	0.062			11.482	12.005	-0.523		11.75	11.9	-0.15		11.312	10.75	8.75	11.994	10.666	9.06		11.437	10.437	9.187	11.992	10.693	9.195		11.5	10.375	8.937	11.991	10.666	9.064		11.562	11.875	11.812	12.08	11.997	11.879
11.482	9.062	0	0	0		9.062	9	9.062	9	0.062			11.482	12.005	-0.523		11.75	11.901	-0.151		11.312	10.75	8.75	11.993	10.666	9.057		11.437	10.437	9.187	11.991	10.693	9.194		11.5	10.375	8.937	11.99	10.665	9.062		11.562	11.875	11.812	12.079	11.996	11.879
11.4909	9.062	0	0	0		9.062	9	9.062	9.062	0.062			11.4909	12.005	-0.514143		11.812	11.901	-0.089		11.312	10.75	8.75	11.993	10.666	9.054		11.437	10.437	9.187	11.991	10.693	9.193		11.5	10.375	8.937	11.99	10.665	9.061		11.562	11.875	11.812	12.079	11.996	11.88
11.482	9	0	0	0		9	8.937	9.062	9.062	0.125			11.482	12.004	-0.522		11.75	11.901	-0.151		11.312	10.75	8.75	11.993	10.666	9.051		11.437	10.437	9.187	11.991	10.693	9.193		11.5	10.375	8.937	11.989	10.665	9.06		11.562	11.875	11.812	12.079	11.996	11.88
11.4909	9	0	0	0		9	8.937	9.062	9.062	0.125			11.4909	12.004	-0.513143		11.75	11.901	-0.151		11.312	10.75	8.75	11.992	10.666	9.048		11.437	10.437	9.187	11.99	10.693	9.192		11.5	10.375	8.937	11.989	10.665	9.059		11.562	11.875	11.812	12.078	11.996	11.88
11.482	9	0	0	0		9	8.937	9.062	9.062	0.125			11.482	12.003	-0.521		11.812	11.901	-0.089		11.312	10.75	8.75	11.992	10.666	9.045		11.437	10.437	9.187	11.99	10.693	9.191		11.5	10.375	8.937	11.988	10.665	9.057		11.562	11.875	11.812	12.078	11.996	11.88
11.491	9	0	0	0		9	8.937	9.062	9.125	0.188			11.491	12.003	-0.512		11.75	11.901	-0.151		11.312	10.75	8.75	11.991	10.666	9.042		11.437	10.437	9.187	11.989	10.693	9.191		11.5	10.375	8.937	11.988	10.665	9.056		11.562	11.875	11.812	12.077	11.996	11.88
11.4909	9	0	0	0		9	8.937	9	9.125	0.188			11.4909	12.002	-0.511143		11.75	11.902	-0.152		11.312	10.75	8.75	11.991	10.665	9.039		11.437	10.437	9.187	11.989	10.692	9.19		11.5	10.375	8.937	11.987	10.665	9.055		11.562	11.875	11.812	12.077	11.996	11.88
11.473	9	0	0	0		9	8.937	9	9.062	0.125			11.473	12.002	-0.529		11.75	11.902	-0.152		11.312	10.75	8.75	11.99	10.665	9.036		11.437	10.437	9.187	11.988	10.692	9.189		11.5	10.375	8.937	11.987	10.665	9.054		11.562	11.875	11.812	12.077	11.996	11.881
11.4999	9	0	0	0		9	8.875	9.062	9.125	0.25			11.4999	12.001	-0.501143		11.75	11.902	-0.152		11.312	10.75	8.75	11.99	10.665	9.033		11.437	10.437	9.187	11.988	10.692	9.189		11.5	10.375	8.937	11.987	10.665	9.053		11.562	11.875	11.75	12.076	11.996	11.881
11.4909	9	0	0	0		9	8.875	9.062	9.062	0.187			11.4909	12.001	-0.510143		11.75	11.902	-0.152		11.312	10.75	8.75	11.989	10.665	9.03		11.437	10.437	9.187	11.987	10.692	9.188		11.5	10.375	8.875	11.986	10.665	9.051		11.562	11.875	11.812	12.076	11.996	11.881
11.491	9	0	0	0		9	8.937	9.062	9.125	0.188			11.491	12.001	-0.51		11.75	11.902	-0.152		11.312	10.75	8.75	11.989	10.665	9.035		11.437	10.437	9.187	11.987	10.692	9.188		11.5	10.375	8.937	11.986	10.664	9.054		11.562	11.875	11.812	12.075	11.995	11.881
11.4909	9	0	0	0		9	8.937	9.062	9.125	0.188			11.4909	12	-0.509143		11.75	11.903	-0.153		11.312	10.75	8.75	11.989	10.665	9.039		11.437	10.437	9.187	11.987	10.692	9.187		11.5	10.375	8.875	11.985	10.664	9.056		11.562	11.875	11.75	12.075	11.995	11.881
11.4909	9	0	0	0		9	8.937	9.062	9.125	0.188			11.4909	12	-0.509143		11.75	11.903	-0.153		11.312	10.75	8.75	11.988	10.665	9.044		11.437	10.437	9.187	11.986	10.692	9.187		11.5	10.375	8.875	11.985	10.664	9.059		11.562	11.875	11.812	12.075	11.995	11.882
11.4999	9	0	0	0		9	8.937	9.062	9.125	0.188			11.4999	11.999	-0.499143		11.75	11.903	-0.153		11.312	10.75	8.75	11.988	10.665	9.049		11.437	10.437	9.187	11.986	10.692	9.187		11.5	10.375	8.937	11.984	10.664	9.061		11.562	11.875	11.812	12.074	11.995	11.882
11.4999	9	0	0	0		9	8.937	9.062	9.125	0.188			11.4999	11.999	-0.499143		11.75	11.903	-0.153		11.312	10.75	8.75	11.987	10.664	9.054		11.437	10.437	9.187	11.985	10.692	9.186		11.5	10.375	8.937	11.984	10.664	9.063		11.562	11.875	11.812	12.074	11.995	11.882
11.4999	9	0	0	0		9	8.937	9.062	9.125	0.188			11.4999	11.999	-0.499143		11.812	11.904	-0.092		11.312	10.75	8.75	11.987	10.664	9.059		11.437	10.437	9.187	11.985	10.692	9.186		11.5	10.375	8.937	11.984	10.664	9.066		11.562	11.875	11.812	12.073	11.995	11.882
11.4999	9	0	0	0		9	8.937	9.062	9.125	0.188			11.4999	11.998	-0.498143		11.75	11.904	-0.154		11.312	10.75	8.75	11.986	10.664	9.064		11.437	10.5	9.187	11.984	10.692	9.186		11.5	10.375	8.937	11.983	10.664	9.068		11.562	11.875	11.812	12.073	11.995	11.882
11.4909	9	0	0	0		9	8.937	9.062	9.125	0.188			11.4909	11.998	-0.507143		11.812	11.904	-0.092		11.312	10.75	8.75	11.986	10.664	9.069		11.437	10.437	9.187	11.984	10.691	9.185		11.5	10.375	8.937	11.983	10.664	9.071		11.562	11.875	11.812	12.073	11.995	11.883
11.4999	9	0	0	0		9	8.937	9.062	9.125	0.188			11.4999	11.998	-0.498143		11.75	11.904	-0.154		11.312	10.75	8.75	11.985	10.664	9.074		11.437	10.437	9.187	11.984	10.691	9.185		11.5	10.375	8.937	11.982	10.663	9.073		11.562	11.875	11.812	12.072	11.995	11.883
11.4999	9	0	0	0		9	8.937	9.062	9.062	0.125			11.4999	11.997	-0.497143		11.75	11.904	-0.154		11.312	10.75	8.75	11.985	10.664	9.079		11.437	10.437	9.187	11.983	10.691	9.185		11.5	10.375	8.937	11.982	10.663	9.075		11.562	11.875	11.812	12.072	11.995	11.883
11.4999	9	0	0	0		9	8.937	9.062	9.062	0.125			11.4999	11.997	-0.497143		11.812	11.905	-0.093		11.312	10.75	8.75	11.985	10.664	9.084		11.437	10.437	9.187	11.983	10.691	9.184		11.5	10.375	8.937	11.981	10.663	9.078		11.562	11.875	11.812	12.071	11.994	11.883
11.4999	9	0	0	0		9	9	9.062	9.062	0.062			11.4999	11.997	-0.497143		11.812	11.905	-0.093		11.312	10.75	8.75	11.984	10.663	9.089		11.437	10.437	9.187	11.982	10.691	9.184		11.5	10.375	8.937	11.981	10.663	9.08		11.562	11.875	11.812	12.071	11.994	11.883
11.4999	9.062	0	0	0		9.062	9	9.062	9.062	0.062			11.4999	11.996	-0.496143		11.812	11.905	-0.093		11.312	10.75	8.75	11.984	10.663	9.094		11.437	10.437	9.187	11.982	10.691	9.184		11.5	10.375	8.937	11.98	10.663	9.083		11.562	11.875	11.75	12.071	11.994	11.884
11.4999	9.062	0	0	0		9.062	9	9.062	9.062	0.062			11.4999	11.996	-0.496143		11.812	11.905	-0.093		11.312	10.75	8.75	11.983	10.663	9.099		11.437	10.437	9.187	11.981	10.691	9.183		11.5	10.375	8.937	11.98	10.663	9.085		11.562	11.875	11.75	12.07	11.994	11.884
11.4909	9.062	0	0	0		9.062	9	9.125	9.062	0.125			11.4909	11.995	-0.504143		11.75	11.906	-0.156		11.312	10.75	8.75	11.983	10.663	9.104		11.437	10.437	9.187	11.981	10.691	9.183		11.5	10.312	8.937	11.98	10.663	9.088		11.562	11.875	11.75	12.07	11.994	11.884
11.4999	9.062	0	0	0		9.062	9	9.062	9.125	0.125			11.4999	11.995	-0.495143		11.812	11.906	-0.094		11.312	10.75	8.75	11.982	10.663	9.109		11.437	10.437	9.187	11.98	10.691	9.183		11.5	10.375	8.937	11.979	10.663	9.09		11.562	11.875	11.75	12.069	11.994	11.884
11.4999	9.062	0	0	0		9.062	9	9.062	9.125	0.125			11.4999	11.995	-0.495143		11.75	11.906	-0.156		11.312	10.75	8.75	11.982	10.663	9.105		11.437	10.437	9.187	11.98	10.691	9.182		11.5	10.375	8.937	11.979	10.662	9.088		11.562	11.875	11.812	12.069	11.994	11.884
11.4999	9	0	0	0		9	9	9.062	9.125	0.125			11.4999	11.994	-0.494143		11.75	11.906	-0.156		11.312	10.75	8.75	11.982	10.663	9.095		11.437	10.437	9.187	11.98	10.69	9.182		11.5	10.312	8.937	11.978	10.662	9.083		11.562	11.875	11.75	12.069	11.994	11.884
11.4999	9	0	0	0		9	9	9.062	9.125	0.125			11.4999	11.994	-0.494143		11.75	11.906	-0.156		11.312	10.75	8.75	11.981	10.662	9.085		11.437	10.437	9.187	11.979	10.69	9.181		11.5	10.375	8.937	11.978	10.662	9.078		11.562	11.875	11.812	12.068	11.994	11.885
11.5089	9	0	0	0		9	8.937	9.062	9.125	0.188			11.5089	11.993	-0.484143		11.75	11.906	-0.156		11.312	10.75	8.75	11.981	10.662	9.075		11.437	10.437	9.187	11.979	10.69	9.18		11.5	10.312	8.937	11.977	10.662	9.073		11.562	11.875	11.812	12.068	11.994	11.885
11.491	9	0	0	0		9	8.937	9.062	9.125	0.188			11.491	11.992	-0.501		11.75	11.907	-0.157		11.312	10.75	8.75	11.98	10.662	9.065		11.437	10.437	9.187	11.978	10.69	9.179		11.5	10.375	8.937	11.977	10.662	9.068		11.562	11.875	11.75	12.067	11.993	11.885
11.491	9	0	0	0		9	8.937	9.062	9.062	0.125			11.491	11.992	-0.501		11.75	11.907	-0.157		11.312	10.75	8.75	11.98	10.662	9.055		11.437	10.437	9.187	11.978	10.69	9.178		11.5	10.312	8.937	11.977	10.662	9.063		11.562	11.875	11.812	12.067	11.993	11.885
11.4999	9	0	0	0		9	8.937	9.062	9.062	0.125			11.4999	11.991	-0.491143		11.75	11.907	-0.157		11.312	10.75	8.75	11.979	10.662	9.044		11.437	10.437	9.187	11.977	10.69	9.178		11.5	10.375	8.937	11.976	10.662	9.058		11.562	11.875	11.812	12.067	11.993	11.885
11.491	9.062	0	0	0		9.062	9	9.062	9.062	0.062			11.491	11.991	-0.5		11.75	11.907	-0.157		11.312	10.75	8.75	11.979	10.662	9.034		11.437	10.437	9.187	11.977	10.69	9.177		11.5	10.312	8.937	11.976	10.661	9.054		11.562	11.875	11.75	12.066	11.993	11.886
11.5089	9	0	0	0		9	9	9.062	9.062	0.062			11.5089	11.99	-0.481143		11.812	11.907	-0.095		11.312	10.75	8.75	11.978	10.662	9.024		11.437	10.437	9.187	11.976	10.69	9.176		11.5	10.312	8.937	11.975	10.661	9.049		11.562	11.875	11.812	12.066	11.993	11.886
11.491	9	0	0	0		9	9	9.062	9.062	0.062			11.491	11.99	-0.499		11.812	11.907	-0.095		11.312	10.75	8.75	11.978	10.661	9.014		11.437	10.437	9.187	11.976	10.69	9.175		11.5	10.312	8.937	11.975	10.661	9.044		11.562	11.875	11.75	12.065	11.993	11.886
11.491	9	0	0	0		9	8.937	9.062	9.125	0.188			11.491	11.989	-0.498		11.75	11.907	-0.157		11.312	10.75	8.75	11.978	10.661	9.004		11.437	10.437	9.125	11.976	10.69	9.175		11.5	10.375	8.937	11.974	10.661	9.039		11.562	11.875	11.75	12.065	11.993	11.886
11.5	9	0	0	0		9	8.937	9	9.125	0.188			11.5	11.989	-0.489		11.75	11.908	-0.158		11.312	10.75	8.75	11.977	10.661	8.994		11.437	10.437	9.187	11.975	10.689	9.174		11.5	10.312	8.875	11.974	10.661	9.034		11.562	11.875	11.75	12.065	11.993	11.886
11.4999	8.937	0	0	0		8.937	8.937	9	9.062	0.125			11.4999	11.988	-0.488143		11.75	11.908	-0.158		11.312	10.75	8.75	11.977	10.661	8.984		11.437	10.437	9.187	11.975	10.689	9.173		11.5	10.375	8.875	11.974	10.661	9.029		11.625	11.875	11.812	12.064	11.993	11.887
11.5	8.937	0	0	0		8.937	8.875	9	9.062	0.187			11.5	11.988	-0.488		11.75	11.908	-0.158		11.312	10.75	8.812	11.976	10.661	8.974		11.437	10.437	9.187	11.974	10.689	9.172		11.5	10.312	8.875	11.973	10.661	9.024		11.562	11.875	11.75	12.064	11.993	11.887
11.491	8.937	0	0	0		8.937	8.937	9	9.062	0.125			11.491	11.987	-0.496		11.75	11.908	-0.158		11.312	10.75	8.75	11.976	10.661	8.964		11.437	10.437	9.187	11.974	10.689	9.172		11.5	10.312	8.875	11.973	10.66	9.019		11.562	11.875	11.812	12.063	11.992	11.887
11.4999	8.937	0	0	0		8.937	8.937	9	9.062	0.125			11.4999	11.986	-0.486143		11.75	11.908	-0.158		11.312	10.75	8.75	11.975	10.66	8.954		11.437	10.437	9.187	11.973	10.689	9.171		11.5	10.375	8.875	11.972	10.66	9.014		11.562	11.875	11.812	12.063	11.992	11.887
11.5	8.937	0	0	0		8.937	8.875	8.937	9.062	0.187			11.5	11.986	-0.486		11.75	11.908	-0.158		11.312	10.75	8.75	11.975	10.66	8.946		11.437	10.437	9.187	11.973	10.689	9.17		11.5	10.375	8.875	11.972	10.66	9.01		11.625	11.875	11.75	12.063	11.992	11.887
11.5089	8.937	0	0	0		8.937	8.875	9	9.062	0.187			11.5089	11.985	-0.476143		11.75	11.909	-0.159		11.312	10.75	8.75	11.975	10.66	8.945		11.437	10.437	9.187	11.973	10.689	9.169		11.5	10.375	8.875	11.971	10.66	9.007		11.625	11.875	11.75	12.062	11.992	11.887
11.5089	8.937	0	0	0		8.937	8.875	8.937	9.062	0.187			11.5089	11.985	-0.476143		11.75	11.909	-0.159		11.312	10.75	8.75	11.974	10.66	8.944		11.437	10.437	9.187	11.972	10.689	9.168		11.5	10.312	8.875	11.971	10.66	9.005		11.562	11.875	11.75	12.062	11.992	11.888
11.5	8.937	0	0	0		8.937	8.875	9	9.062	0.187			11.5	11.985	-0.485		11.75	11.909	-0.159		11.312	10.75	8.75	11.974	10.66	8.943		11.437	10.437	9.125	11.972	10.689	9.167		11.5	10.375	8.875	11.97	10.66	9.002		11.562	11.875	11.75	12.061	11.992	11.888
11.491	8.937	0	0	0		8.937	8.937	8.937	9.062	0.125			11.491	11.984	-0.493		11.75	11.909	-0.159		11.312	10.75	8.75	11.973	10.66	8.942		11.437	10.437	9.187	11.971	10.689	9.166		11.5	10.312	8.875	11.97	10.66	9		11.562	11.875	11.75	12.061	11.992	11.888
11.5	8.937	0	0	0		8.937	8.875	8.937	9.062	0.187			11.5	11.984	-0.484		11.75	11.909	-0.159		11.312	10.75	8.75	11.973	10.659	8.941		11.437	10.437	9.187	11.971	10.688	9.165		11.5	10.312	8.875	11.97	10.659	8.997		11.562	11.875	11.75	12.061	11.992	11.888
11.5089	8.937	0	0	0		8.937	8.875	8.937	9.062	0.187			11.5089	11.983	-0.474143		11.75	11.909	-0.159		11.312	10.75	8.75	11.972	10.659	8.94		11.437	10.437	9.187	11.97	10.688	9.164		11.5	10.375	8.875	11.969	10.659	8.995		11.625	11.875	11.75	12.06	11.992	11.888
11.4999	8.937	0	0	0		8.937	8.875	8.937	9.062	0.187			11.4999	11.983	-0.483143		11.75	11.91	-0.16		11.312	10.75	8.75	11.972	10.659	8.939		11.437	10.437	9.125	11.97	10.688	9.162		11.5	10.312	8.875	11.969	10.659	8.993		11.625	11.875	11.75	12.06	11.992	11.889
11.5089	8.937	0	0	0		8.937	8.875	8.937	9.062	0.187			11.5089	11.982	-0.473143		11.75	11.91	-0.16		11.312	10.75	8.75	11.972	10.659	8.938		11.437	10.437	9.187	11.97	10.688	9.161		11.5	10.312	8.812	11.968	10.659	8.99		11.625	11.875	11.75	12.059	11.991	11.889
11.5089	8.937	0	0	0		8.937	8.875	8.937	9.062	0.187			11.5089	11.982	-0.473143		11.812	11.91	-0.098		11.312	10.75	8.75	11.971	10.659	8.937		11.437	10.437	9.187	11.969	10.688	9.16		11.5	10.312	8.812	11.968	10.659	8.988		11.562	11.875	11.75	12.059	11.991	11.889
11.5	8.937	0	0	0		8.937	8.875	8.937	9.062	0.187			11.5	11.981	-0.481		11.75	11.91	-0.16		11.312	10.75	8.75	11.971	10.659	8.936		11.437	10.437	9.125	11.969	10.688	9.159		11.5	10.312	8.812	11.967	10.659	8.985		11.625	11.875	11.75	12.059	11.991	11.889
11.5089	8.937	0	0	0		8.937	8.875	8.937	9.062	0.187			11.5089	11.981	-0.472143		11.75	11.91	-0.16		11.312	10.75	8.75	11.97	10.658	8.935		11.437	10.437	9.125	11.968	10.688	9.158		11.5	10.312	8.812	11.967	10.658	8.983		11.562	11.875	11.75	12.058	11.991	11.889
11.5177	8.937	0	0	0		8.937	8.875	8.937	9	0.125			11.5177	11.98	-0.462286		11.75	11.91	-0.16		11.312	10.75	8.75	11.97	10.658	8.934		11.437	10.437	9.187	11.968	10.688	9.157		11.5	10.312	8.812	11.967	10.658	8.98		11.625	11.875	11.75	12.058	11.991	11.889
11.5089	8.937	0	0	0		8.937	8.875	8.937	9	0.125			11.5089	11.98	-0.471143		11.75	11.911	-0.161		11.312	10.75	8.75	11.969	10.658	8.933		11.437	10.437	9.187	11.967	10.687	9.156		11.5	10.312	8.812	11.966	10.658	8.978		11.625	11.875	11.75	12.057	11.991	11.89
11.5089	8.937	0	0	0		8.937	8.875	8.937	9.062	0.187			11.5089	11.98	-0.471143		11.75	11.911	-0.161		11.312	10.75	8.75	11.969	10.658	8.932		11.437	10.437	9.125	11.967	10.687	9.155		11.5	10.312	8.812	11.966	10.658	8.975		11.625	11.875	11.75	12.057	11.991	11.89
11.5089	8.937	0	0	0		8.937	8.812	8.937	9.062	0.25			11.5089	11.979	-0.470143		11.75	11.911	-0.161		11.312	10.75	8.75	11.968	10.658	8.931		11.437	10.437	9.125	11.966	10.687	9.154		11.5	10.312	8.812	11.965	10.658	8.973		11.625	11.875	11.75	12.057	11.991	11.89
11.5089	8.937	0	0	0		8.937	8.812	8.937	9	0.188			11.5089	11.979	-0.470143		11.75	11.911	-0.161		11.312	10.75	8.75	11.968	10.658	8.93		11.437	10.437	9.125	11.966	10.687	9.153		11.5	10.312	8.812	11.965	10.658	8.97		11.625	11.875	11.75	12.056	11.991	11.89
11.5089	8.937	0	0	0		8.937	8.812	8.937	9	0.188			11.5089	11.978	-0.469143		11.75	11.911	-0.161		11.312	10.75	8.75	11.968	10.657	8.93		11.437	10.437	9.125	11.966	10.687	9.151		11.5	10.312	8.812	11.964	10.658	8.969		11.562	11.875	11.75	12.056	11.991	11.89
11.5177	8.937	0	0	0		8.937	8.812	8.937	9	0.188			11.5177	11.978	-0.460286		11.75	11.911	-0.161		11.312	10.75	8.75	11.967	10.657	8.93		11.437	10.437	9.125	11.965	10.687	9.15		11.5	10.312	8.812	11.964	10.657	8.968		11.625	11.875	11.75	12.055	11.99	11.891
11.5177	8.937	0	0	0		8.937	8.812	8.937	9	0.188			11.5177	11.977	-0.459286		11.75	11.912	-0.162		11.312	10.75	8.687	11.967	10.657	8.929		11.437	10.437	9.125	11.965	10.687	9.149		11.5	10.312	8.812	11.964	10.657	8.967		11.625	11.875	11.75	12.055	11.99	11.891
11.5089	8.937	0	0	0		8.937	8.812	8.875	9	0.188			11.5089	11.977	-0.468143		11.75	11.912	-0.162		11.312	10.75	8.687	11.966	10.657	8.929		11.437	10.437	9.125	11.964	10.687	9.148		11.5	10.375	8.812	11.963	10.657	8.966		11.625	11.875	11.75	12.055	11.99	11.891
11.5089	8.937	0	0	0		8.937	8.812	8.937	9	0.188			11.5089	11.976	-0.467143		11.75	11.912	-0.162		11.312	10.75	8.687	11.966	10.657	8.929		11.437	10.437	9.125	11.964	10.687	9.147		11.5	10.312	8.812	11.963	10.657	8.965		11.562	11.875	11.75	12.054	11.99	11.891
11.5089	8.937	0	0	0		8.937	8.812	8.937	9	0.188			11.5089	11.976	-0.467143		11.75	11.912	-0.162		11.312	10.75	8.687	11.965	10.656	8.929		11.437	10.437	9.125	11.963	10.686	9.146		11.5	10.312	8.812	11.962	10.657	8.963		11.625	11.875	11.75	12.054	11.99	11.891
11.5089	8.875	0	0	0		8.875	8.812	8.937	9	0.188			11.5089	11.976	-0.467143		11.75	11.912	-0.162		11.312	10.75	8.687	11.965	10.656	8.929		11.437	10.437	9.125	11.963	10.686	9.145		11.5	10.312	8.812	11.962	10.656	8.962		11.625	11.875	11.75	12.053	11.99	11.891
11.5089	8.875	0	0	0		8.875	8.812	8.937	9	0.188			11.5089	11.975	-0.466143		11.75	11.912	-0.162		11.312	10.75	8.687	11.965	10.656	8.929		11.437	10.437	9.125	11.963	10.686	9.143		11.5	10.312	8.812	11.961	10.656	8.961		11.625	11.875	11.75	12.053	11.99	11.892
11.5089	8.875	0	0	0		8.875	8.812	8.875	9	0.188			11.5089	11.975	-0.466143		11.75	11.912	-0.162		11.312	10.75	8.687	11.964	10.656	8.929		11.437	10.437	9.125	11.962	10.686	9.142		11.5	10.312	8.812	11.961	10.656	8.96		11.625	11.875	11.75	12.053	11.99	11.892
11.5177	8.875	0	0	0		8.875	8.812	8.937	9.062	0.25			11.5177	11.974	-0.456286		11.75	11.913	-0.163		11.312	10.75	8.687	11.964	10.656	8.928		11.437	10.437	9.125	11.962	10.686	9.141		11.562	10.312	8.812	11.961	10.656	8.959		11.625	11.875	11.75	12.052	11.99	11.892
11.5089	8.875	0	0	0		8.875	8.812	8.937	9.062	0.25			11.5089	11.974	-0.465143		11.75	11.913	-0.163		11.312	10.75	8.687	11.963	10.656	8.928		11.437	10.437	9.125	11.961	10.686	9.14		11.562	10.312	8.812	11.96	10.656	8.958		11.625	11.875	11.75	12.052	11.99	11.892
11.5177	8.937	0	0	0		8.937	8.812	8.937	9	0.188			11.5177	11.973	-0.455286		11.75	11.913	-0.163		11.312	10.75	8.687	11.963	10.655	8.928		11.437	10.437	9.125	11.961	10.686	9.139		11.5	10.312	8.812	11.96	10.656	8.957		11.625	11.875	11.75	12.051	11.989	11.892
11.5089	8.875	0	0	0		8.875	8.812	8.937	9.062	0.25			11.5089	11.973	-0.464143		11.75	11.913	-0.163		11.312	10.75	8.687	11.962	10.655	8.928		11.437	10.437	9.125	11.96	10.686	9.138		11.5	10.312	8.812	11.959	10.655	8.956		11.625	11.875	11.75	12.051	11.989	11.893
11.5089	8.875	0	0	0		8.875	8.75	8.875	9	0.25			11.5089	11.972	-0.463143		11.75	11.913	-0.163		11.312	10.75	8.687	11.962	10.655	8.928		11.437	10.437	9.187	11.96	10.685	9.137		11.5	10.312	8.812	11.959	10.655	8.954		11.625	11.875	11.75	12.051	11.989	11.893
11.5089	8.875	0	0	0		8.875	8.75	8.875	9	0.25			11.5089	11.972	-0.463143		11.75	11.914	-0.164		11.312	10.75	8.687	11.962	10.655	8.928		11.437	10.437	9.125	11.959	10.685	9.135		11.5	10.312	8.812	11.958	10.655	8.953		11.625	11.875	11.75	12.05	11.989	11.893
11.5089	8.875	0	0	0		8.875	8.75	8.875	9	0.25			11.5089	11.972	-0.463143		11.75	11.914	-0.164		11.312	10.75	8.687	11.961	10.655	8.928		11.437	10.437	9.125	11.959	10.685	9.134		11.5	10.312	8.812	11.958	10.655	8.952		11.625	11.875	11.75	12.05	11.989	11.893
11.5089	8.875	0	0	0		8.875	8.812	8.875	9	0.188			11.5089	11.971	-0.462143		11.75	11.914	-0.164		11.312	10.75	8.687	11.961	10.654	8.926		11.437	10.437	9.125	11.959	10.685	9.133		11.5	10.312	8.75	11.957	10.655	8.951		11.625	11.875	11.75	12.049	11.989	11.893
11.5089	8.875	0	0	0		8.875	8.812	8.875	8.937	0.125			11.5089	11.971	-0.462143		11.75	11.914	-0.164		11.312	10.75	8.687	11.96	10.654	8.923		11.437	10.437	9.125	11.958	10.685	9.132		11.562	10.312	8.75	11.957	10.655	8.948		11.625	11.875	11.75	12.049	11.989	11.893
11.5089	8.875	0	0	0		8.875	8.812	8.875	9	0.188			11.5089	11.97	-0.461143		11.75	11.914	-0.164		11.312	10.75	8.687	11.96	10.654	8.921		11.437	10.437	9.125	11.958	10.685	9.13		11.562	10.312	8.75	11.957	10.654	8.946		11.625	11.875	11.75	12.049	11.989	11.894
11.5089	8.875	0	0	0		8.875	8.75	8.875	9	0.25			11.5089	11.97	-0.461143		11.75	11.914	-0.164		11.312	10.75	8.687	11.959	10.654	8.918		11.437	10.437	9.125	11.957	10.685	9.129		11.5	10.375	8.75	11.956	10.654	8.943		11.625	11.875	11.75	12.048	11.989	11.894
11.5089	8.875	0	0	0		8.875	8.75	8.875	9	0.25			11.5089	11.969	-0.460143		11.75	11.914	-0.164		11.312	10.75	8.687	11.959	10.654	8.915		11.437	10.437	9.125	11.957	10.684	9.127		11.562	10.312	8.75	11.956	10.654	8.941		11.625	11.875	11.75	12.048	11.988	11.894
11.5177	8.875	0	0	0		8.875	8.75	8.875	9	0.25			11.5177	11.969	-0.451286		11.75	11.914	-0.164		11.312	10.75	8.687	11.958	10.653	8.912		11.437	10.437	9.125	11.956	10.684	9.126		11.5	10.312	8.75	11.955	10.654	8.939		11.625	11.875	11.75	12.047	11.988	11.894
11.5089	8.875	0	0	0		8.875	8.75	8.875	9	0.25			11.5089	11.968	-0.459143		11.75	11.915	-0.165		11.312	10.75	8.687	11.958	10.653	8.909		11.437	10.437	9.125	11.956	10.684	9.125		11.5	10.312	8.75	11.955	10.653	8.936		11.625	11.875	11.812	12.047	11.988	11.894
11.5089	8.875	0	0	0		8.875	8.75	8.875	9	0.25			11.5089	11.968	-0.459143		11.75	11.915	-0.165		11.312	10.75	8.687	11.958	10.653	8.906		11.437	10.437	9.125	11.956	10.684	9.123		11.562	10.312	8.75	11.954	10.653	8.934		11.625	11.875	11.75	12.047	11.988	11.894
11.5089	8.875	0	0	0		8.875	8.75	8.875	9	0.25			11.5089	11.967	-0.458143		11.75	11.915	-0.165		11.312	10.75	8.625	11.957	10.653	8.904		11.437	10.437	9.125	11.955	10.684	9.122		11.562	10.312	8.75	11.954	10.653	8.932		11.625	11.875	11.75	12.046	11.988	11.895
11.5089	8.812	0	0	0		8.812	8.75	8.812	8.937	0.187			11.5089	11.967	-0.458143		11.75	11.915	-0.165		11.312	10.75	8.687	11.957	10.652	8.901		11.437	10.437	9.125	11.955	10.684	9.12		11.5	10.312	8.75	11.954	10.653	8.929		11.625	11.875	11.75	12.046	11.988	11.895
11.5089	8.875	0	0	0		8.875	8.75	8.812	8.937	0.187			11.5089	11.966	-0.457143		11.812	11.915	-0.103		11.312	10.687	8.625	11.956	10.652	8.898		11.437	10.437	9.125	11.954	10.684	9.119		11.562	10.312	8.75	11.953	10.653	8.927		11.625	11.875	11.75	12.045	11.988	11.895
11.5089	8.812	0	0	0		8.812	8.687	8.812	8.937	0.25			11.5089	11.966	-0.457143		11.812	11.915	-0.103		11.312	10.75	8.687	11.956	10.652	8.895		11.437	10.437	9.125	11.954	10.683	9.117		11.562	10.312	8.75	11.953	10.652	8.924		11.625	11.875	11.75	12.045	11.988	11.895
11.5177	8.812	0	0	0		8.812	8.687	8.812	8.937	0.25			11.5177	11.965	-0.447286		11.75	11.915	-0.165		11.312	10.75	8.625	11.955	10.652	8.892		11.437	10.437	9.125	11.953	10.683	9.116		11.562	10.312	8.75	11.952	10.652	8.922		11.625	11.875	11.75	12.045	11.988	11.895
11.5177	8.812	0	0	0		8.812	8.687	8.812	8.937	0.25			11.5177	11.965	-0.447286		11.812	11.916	-0.104		11.312	10.75	8.625	11.955	10.652	8.89		11.437	10.437	9.125	11.953	10.683	9.115		11.562	10.312	8.75	11.952	10.652	8.92		11.625	11.875	11.75	12.044	11.988	11.895
11.5177	8.812	0	0	0		8.812	8.687	8.812	8.875	0.188			11.5177	11.964	-0.446286		11.75	11.916	-0.166		11.312	10.75	8.625	11.955	10.651	8.887		11.437	10.437	9.125	11.952	10.683	9.113		11.562	10.312	8.75	11.951	10.652	8.917		11.625	11.875	11.75	12.044	11.987	11.896
11.5089	8.812	0	0	0		8.812	8.687	8.812	8.875	0.188			11.5089	11.964	-0.455143		11.75	11.916	-0.166		11.312	10.75	8.625	11.954	10.651	8.884		11.437	10.437	9.125	11.952	10.683	9.112		11.562	10.312	8.75	11.951	10.652	8.915		11.625	11.875	11.75	12.043	11.987	11.896
11.5089	8.812	0	0	0		8.812	8.687	8.812	8.875	0.188			11.5089	11.964	-0.455143		11.75	11.916	-0.166		11.312	10.75	8.625	11.954	10.651	8.881		11.437	10.437	9.125	11.952	10.683	9.11		11.562	10.312	8.75	11.951	10.651	8.913		11.625	11.875	11.75	12.043	11.987	11.896
11.5266	8.812	0	0	0		8.812	8.687	8.812	8.875	0.188			11.5266	11.963	-0.436429		11.75	11.916	-0.166		11.312	10.75	8.625	11.953	10.651	8.878		11.437	10.437	9.125	11.951	10.683	9.109		11.5	10.312	8.75	11.95	10.651	8.91		11.625	11.875	11.75	12.043	11.987	11.896
11.5266	8.812	0	0	0		8.812	8.687	8.812	8.875	0.188			11.5266	11.963	-0.436429		11.75	11.916	-0.166		11.312	10.75	8.625	11.953	10.65	8.876		11.437	10.437	9.125	11.951	10.682	9.108		11.562	10.312	8.75	11.95	10.651	8.908		11.625	11.875	11.75	12.042	11.987	11.896
11.5177	8.812	0	0	0		8.812	8.687	8.812	8.875	0.188			11.5177	11.962	-0.444286		11.75	11.916	-0.166		11.312	10.687	8.625	11.952	10.65	8.873		11.437	10.437	9.125	11.95	10.682	9.106		11.562	10.312	8.75	11.949	10.651	8.905		11.625	11.875	11.75	12.042	11.987	11.896
11.5177	8.812	0	0	0		8.812	8.687	8.812	8.875	0.188			11.5177	11.962	-0.444286		11.75	11.916	-0.166		11.312	10.75	8.625	11.952	10.65	8.87		11.5	10.437	9.125	11.95	10.682	9.105		11.562	10.312	8.75	11.949	10.651	8.903		11.625	11.875	11.812	12.041	11.987	11.897
11.5089	8.812	0	0	0		8.812	8.687	8.812	8.875	0.188			11.5089	11.961	-0.452143		11.75	11.917	-0.167		11.312	10.75	8.625	11.952	10.65	8.867		11.437	10.437	9.125	11.949	10.682	9.103		11.562	10.312	8.75	11.948	10.65	8.901		11.625	11.875	11.75	12.041	11.987	11.897
11.5089	8.812	0	0	0		8.812	8.687	8.812	8.875	0.188			11.5089	11.961	-0.452143		11.75	11.917	-0.167		11.312	10.75	8.625	11.951	10.649	8.864		11.5	10.437	9.125	11.949	10.682	9.102		11.562	10.312	8.687	11.948	10.65	8.898		11.625	11.875	11.75	12.041	11.987	11.897
11.5089	8.812	0	0	0		8.812	8.687	8.75	8.875	0.188			11.5089	11.96	-0.451143		11.75	11.917	-0.167		11.312	10.75	8.625	11.951	10.649	8.861		11.5	10.437	9.125	11.949	10.682	9.101		11.562	10.312	8.687	11.948	10.65	8.896		11.625	11.875	11.75	12.04	11.987	11.897
11.5177	8.812	0	0	0		8.812	8.687	8.75	8.875	0.188			11.5177	11.96	-0.442286		11.75	11.917	-0.167		11.312	10.75	8.625	11.95	10.649	8.859		11.437	10.437	9.125	11.948	10.682	9.099		11.562	10.312	8.687	11.947	10.65	8.894		11.625	11.875	11.75	12.04	11.986	11.897
11.5177	8.75	0	0	0		8.75	8.687	8.75	8.875	0.188			11.5177	11.959	-0.441286		11.75	11.917	-0.167		11.312	10.687	8.625	11.95	10.649	8.856		11.5	10.437	9.125	11.948	10.681	9.098		11.562	10.312	8.687	11.947	10.65	8.891		11.625	11.875	11.75	12.039	11.986	11.897
11.5266	8.812	0	0	0		8.812	8.687	8.812	8.875	0.188			11.5266	11.959	-0.432429		11.75	11.917	-0.167		11.312	10.75	8.625	11.949	10.649	8.853		11.5	10.437	9.125	11.947	10.681	9.096		11.562	10.312	8.687	11.946	10.649	8.889		11.625	11.875	11.75	12.039	11.986	11.898
11.5266	8.812	0	0	0		8.812	8.687	8.812	8.875	0.188			11.5266	11.958	-0.431429		11.75	11.917	-0.167		11.312	10.75	8.625	11.949	10.648	8.85		11.437	10.437	9.125	11.947	10.681	9.095		11.562	10.312	8.687	11.946	10.649	8.886		11.625	11.875	11.75	12.039	11.986	11.898
11.5266	8.812	0	0	0		8.812	8.687	8.812	8.875	0.188			11.5266	11.958	-0.431429		11.75	11.918	-0.168		11.312	10.75	8.625	11.948	10.648	8.847		11.5	10.437	9.125	11.946	10.681	9.094		11.562	10.312	8.687	11.945	10.649	8.884		11.625	11.875	11.75	12.038	11.986	11.898
11.5266	8.812	0	0	0		8.812	8.687	8.812	8.875	0.188			11.5266	11.957	-0.430429		11.75	11.918	-0.168		11.312	10.75	8.562	11.948	10.648	8.845		11.5	10.437	9.125	11.946	10.681	9.092		11.562	10.312	8.687	11.945	10.649	8.882		11.625	11.875	11.75	12.038	11.986	11.898
11.5177	8.75	0	0	0		8.75	8.687	8.75	8.875	0.188			11.5177	11.957	-0.439286		11.75	11.918	-0.168		11.312	10.687	8.562	11.948	10.648	8.842		11.5	10.437	9.125	11.945	10.681	9.091		11.562	10.312	8.687	11.944	10.648	8.879		11.625	11.875	11.75	12.037	11.986	11.898
11.5266	8.812	0	0	0		8.812	8.687	8.75	8.875	0.188			11.5266	11.956	-0.429429		11.75	11.918	-0.168		11.312	10.687	8.625	11.947	10.647	8.839		11.5	10.437	9.125	11.945	10.68	9.089		11.562	10.312	8.687	11.944	10.648	8.877		11.625	11.875	11.75	12.037	11.986	11.898
11.5089	8.75	0	0	0		8.75	8.625	8.75	8.875	0.25			11.5089	11.956	-0.447143		11.75	11.918	-0.168		11.312	10.75	8.562	11.947	10.647	8.836		11.5	10.437	9.125	11.945	10.68	9.088		11.562	10.312	8.687	11.944	10.648	8.875		11.625	11.875	11.75	12.037	11.986	11.899
11.5177	8.75	0	0	0		8.75	8.625	8.75	8.875	0.25			11.5177	11.955	-0.437286		11.75	11.918	-0.168		11.312	10.75	8.562	11.946	10.647	8.833		11.5	10.437	9.125	11.944	10.68	9.086		11.562	10.312	8.687	11.943	10.648	8.872		11.625	11.875	11.75	12.036	11.985	11.899
11.5266	8.75	0	0	0		8.75	8.625	8.75	8.812	0.187			11.5266	11.955	-0.428429		11.75	11.918	-0.168		11.312	10.687	8.562	11.946	10.647	8.83		11.5	10.437	9.125	11.944	10.68	9.085		11.562	10.312	8.687	11.943	10.648	8.869		11.625	11.875	11.75	12.036	11.985	11.899
11.5266	8.75	0	0	0		8.75	8.625	8.75	8.812	0.187			11.5266	11.954	-0.427429		11.75	11.918	-0.168		11.312	10.687	8.562	11.945	10.646	8.827		11.5	10.437	9.125	11.943	10.68	9.083		11.562	10.312	8.687	11.942	10.647	8.866		11.625	11.875	11.75	12.035	11.985	11.899
11.5266	8.75	0	0	0		8.75	8.625	8.75	8.812	0.187			11.5266	11.954	-0.427429		11.75	11.919	-0.169		11.312	10.687	8.562	11.945	10.646	8.824		11.5	10.437	9.125	11.943	10.68	9.081		11.562	10.312	8.687	11.942	10.647	8.864		11.625	11.875	11.75	12.035	11.985	11.899
11.5177	8.75	0	0	0		8.75	8.625	8.75	8.812	0.187			11.5177	11.954	-0.436286		11.75	11.919	-0.169		11.312	10.687	8.562	11.945	10.646	8.821		11.5	10.437	9.125	11.942	10.679	9.079		11.562	10.312	8.687	11.941	10.647	8.861		11.625	11.875	11.75	12.035	11.985	11.899
11.5266	8.75	0	0	0		8.75	8.625	8.75	8.812	0.187			11.5266	11.953	-0.426429		11.75	11.919	-0.169		11.312	10.687	8.562	11.944	10.646	8.818		11.5	10.437	9.125	11.942	10.679	9.078		11.562	10.312	8.687	11.941	10.647	8.858		11.625	11.875	11.75	12.034	11.985	11.899
11.5266	8.75	0	0	0		8.75	8.625	8.75	8.812	0.187			11.5266	11.953	-0.426429		11.75	11.919	-0.169		11.312	10.75	8.562	11.944	10.645	8.815		11.5	10.437	9.125	11.942	10.679	9.076		11.562	10.312	8.687	11.941	10.646	8.855		11.625	11.875	11.75	12.034	11.985	11.9
11.5089	8.75	0	0	0		8.75	8.625	8.75	8.812	0.187			11.5089	11.952	-0.443143		11.75	11.919	-0.169		11.312	10.687	8.562	11.943	10.645	8.812		11.5	10.437	9.062	11.941	10.679	9.074		11.562	10.312	8.687	11.94	10.646	8.853		11.625	11.875	11.75	12.033	11.985	11.9
11.5177	8.75	0	0	0		8.75	8.625	8.75	8.812	0.187			11.5177	11.952	-0.434286		11.75	11.919	-0.169		11.312	10.687	8.562	11.943	10.645	8.809		11.5	10.437	9.062	11.941	10.679	9.073		11.562	10.312	8.687	11.94	10.646	8.85		11.625	11.875	11.75	12.033	11.985	11.9
11.5266	8.75	0	0	0		8.75	8.625	8.687	8.812	0.187			11.5266	11.951	-0.424429		11.75	11.919	-0.169		11.312	10.687	8.562	11.942	10.645	8.806		11.5	10.437	9.125	11.94	10.679	9.071		11.562	10.312	8.687	11.939	10.646	8.847		11.625	11.875	11.75	12.033	11.985	11.9
11.5177	8.75	0	0	0		8.75	8.625	8.687	8.812	0.187			11.5177	11.951	-0.433286		11.75	11.919	-0.169		11.312	10.687	8.562	11.942	10.644	8.804		11.5	10.437	9.062	11.94	10.678	9.069		11.562	10.312	8.687	11.939	10.645	8.844		11.625	11.875	11.75	12.032	11.984	11.9
11.5266	8.75	0	0	0		8.75	8.625	8.687	8.812	0.187			11.5266	11.95	-0.423429		11.75	11.919	-0.169		11.312	10.687	8.562	11.942	10.644	8.801		11.5	10.437	9.062	11.939	10.678	9.067		11.562	10.312	8.625	11.938	10.645	8.841		11.625	11.875	11.75	12.032	11.984	11.9
11.5177	8.75	0	0	0		8.75	8.625	8.687	8.812	0.187			11.5177	11.95	-0.432286		11.75	11.92	-0.17		11.312	10.687	8.562	11.941	10.644	8.798		11.5	10.437	9.062	11.939	10.678	9.066		11.562	10.312	8.625	11.938	10.645	8.839		11.625	11.875	11.75	12.031	11.984	11.901
11.5177	8.75	0	0	0		8.75	8.625	8.75	8.812	0.187			11.5177	11.949	-0.431286		11.75	11.92	-0.17		11.312	10.687	8.5	11.941	10.643	8.795		11.5	10.437	9.062	11.938	10.678	9.064		11.562	10.312	8.625	11.937	10.645	8.836		11.625	11.875	11.75	12.031	11.984	11.901
11.5266	8.75	0	0	0		8.75	8.625	8.687	8.812	0.187			11.5266	11.949	-0.422429		11.75	11.92	-0.17		11.312	10.687	8.5	11.94	10.643	8.792		11.5	10.437	9.062	11.938	10.678	9.062		11.562	10.312	8.625	11.937	10.644	8.833		11.625	11.875	11.75	12.031	11.984	11.901
11.5177	8.75	0	0	0		8.75	8.625	8.687	8.812	0.187			11.5177	11.948	-0.430286		11.75	11.92	-0.17		11.312	10.687	8.5	11.94	10.643	8.789		11.5	10.437	9.062	11.938	10.678	9.061		11.562	10.312	8.625	11.937	10.644	8.83		11.625	11.875	11.75	12.03	11.984	11.901
11.5177	8.75	0	0	0		8.75	8.625	8.75	8.75	0.125			11.5177	11.948	-0.430286		11.75	11.92	-0.17		11.312	10.687	8.5	11.939	10.643	8.786		11.5	10.437	9.062	11.937	10.677	9.059		11.562	10.312	8.625	11.936	10.644	8.828		11.625	11.875	11.75	12.03	11.984	11.901
11.5177	8.75	0	0	0		8.75	8.687	8.75	8.75	0.063			11.5177	11.947	-0.429286		11.75	11.92	-0.17		11.312	10.687	8.5	11.939	10.642	8.783		11.5	10.437	9.062	11.937	10.677	9.057		11.562	10.312	8.625	11.936	10.644	8.825		11.625	11.875	11.75	12.029	11.984	11.901
11.5266	8.75	0	0	0		8.75	8.625	8.75	8.75	0.125			11.5266	11.947	-0.420429		11.75	11.92	-0.17		11.312	10.687	8.5	11.938	10.642	8.78		11.5	10.437	9.062	11.936	10.677	9.055		11.562	10.312	8.625	11.935	10.643	8.822		11.625	11.875	11.75	12.029	11.984	11.901
11.5177	8.75	0	0	0		8.75	8.625	8.75	8.75	0.125			11.5177	11.946	-0.428286		11.75	11.92	-0.17		11.312	10.687	8.5	11.938	10.642	8.777		11.5	10.437	9.062	11.936	10.677	9.054		11.562	10.312	8.625	11.935	10.643	8.819		11.625	11.875	11.75	12.029	11.983	11.902
11.5443	8.75	0	0	0		8.75	8.625	8.687	8.812	0.187			11.5443	11.946	-0.401714		11.75	11.92	-0.17		11.312	10.687	8.5	11.938	10.642	8.774		11.5	10.437	9.125	11.935	10.677	9.052		11.562	10.312	8.625	11.934	10.643	8.816		11.625	11.875	11.75	12.028	11.983	11.902
11.5354	8.75	0	0	0		8.75	8.562	8.687	8.812	0.25			11.5354	11.945	-0.409571		11.75	11.921	-0.171		11.312	10.687	8.5	11.937	10.641	8.771		11.5	10.437	9.062	11.935	10.677	9.05		11.562	10.312	8.625	11.934	10.643	8.814		11.625	11.875	11.75	12.028	11.983	11.902
11.5266	8.687	0	0	0		8.687	8.562	8.687	8.812	0.25			11.5266	11.945	-0.418429		11.75	11.921	-0.171		11.312	10.687	8.5	11.937	10.641	8.768		11.5	10.437	9.062	11.935	10.676	9.048		11.562	10.312	8.625	11.934	10.642	8.811		11.625	11.875	11.75	12.027	11.983	11.902
11.5266	8.687	0	0	0		8.687	8.562	8.687	8.812	0.25			11.5266	11.944	-0.417429		11.75	11.921	-0.171		11.312	10.687	8.5	11.936	10.641	8.765		11.5	10.437	9.062	11.934	10.676	9.047		11.562	10.312	8.625	11.933	10.642	8.808		11.625	11.875	11.75	12.027	11.983	11.902
11.5266	8.687	0	0	0		8.687	8.562	8.687	8.812	0.25			11.5266	11.944	-0.417429		11.75	11.921	-0.171		11.312	10.687	8.5	11.936	10.641	8.762		11.5	10.437	9.062	11.934	10.676	9.045		11.562	10.312	8.625	11.933	10.642	8.805		11.625	11.875	11.75	12.027	11.983	11.902
11.5177	8.687	0	0	0		8.687	8.562	8.687	8.812	0.25			11.5177	11.943	-0.425286		11.75	11.921	-0.171		11.312	10.687	8.5	11.935	10.64	8.759		11.5	10.437	9.062	11.933	10.676	9.043		11.562	10.312	8.625	11.932	10.642	8.803		11.625	11.875	11.75	12.026	11.983	11.903
11.5266	8.687	0	0	0		8.687	8.5	8.687	8.812	0.312			11.5266	11.943	-0.416429		11.75	11.921	-0.171		11.312	10.687	8.5	11.935	10.64	8.756		11.5	10.437	9.062	11.933	10.676	9.042		11.562	10.312	8.625	11.932	10.641	8.8		11.625	11.875	11.75	12.026	11.983	11.903
11.5177	8.687	0	0	0		8.687	8.562	8.687	8.812	0.25			11.5177	11.942	-0.424286		11.75	11.921	-0.171		11.312	10.687	8.5	11.935	10.64	8.753		11.5	10.437	9.062	11.932	10.675	9.04		11.562	10.312	8.625	11.931	10.641	8.797		11.625	11.875	11.75	12.025	11.983	11.903
11.5177	8.687	0	0	0		8.687	8.562	8.687	8.812	0.25			11.5177	11.942	-0.424286		11.75	11.921	-0.171		11.312	10.687	8.5	11.934	10.639	8.75		11.5	10.437	9.062	11.932	10.675	9.038		11.562	10.312	8.562	11.931	10.641	8.794		11.625	11.875	11.75	12.025	11.983	11.903
11.5266	8.687	0	0	0		8.687	8.562	8.687	8.812	0.25			11.5266	11.941	-0.414429		11.75	11.921	-0.171		11.312	10.687	8.5	11.934	10.639	8.747		11.5	10.437	9.062	11.931	10.675	9.036		11.562	10.312	8.562	11.931	10.641	8.791		11.625	11.875	11.75	12.025	11.982	11.903
11.5354	8.687	0	0	0		8.687	8.562	8.687	8.75	0.188			11.5354	11.941	-0.405571		11.75	11.922	-0.172		11.312	10.687	8.5	11.933	10.639	8.744		11.5	10.437	9.062	11.931	10.675	9.035		11.562	10.312	8.562	11.93	10.64	8.789		11.625	11.875	11.75	12.024	11.982	11.903
11.5354	8.687	0	0	0		8.687	8.562	8.687	8.75	0.188			11.5354	11.94	-0.404571		11.75	11.922	-0.172		11.312	10.687	8.5	11.933	10.639	8.741		11.5	10.437	9.062	11.931	10.675	9.033		11.562	10.312	8.625	11.93	10.64	8.786		11.625	11.875	11.75	12.024	11.982	11.903
11.5266	8.687	0	0	0		8.687	8.562	8.687	8.75	0.188			11.5266	11.94	-0.413429		11.75	11.922	-0.172		11.312	10.687	8.437	11.932	10.638	8.738		11.5	10.437	9.062	11.93	10.675	9.031		11.562	10.312	8.625	11.929	10.64	8.783		11.625	11.875	11.75	12.023	11.982	11.904
11.5354	8.687	0	0	0		8.687	8.562	8.687	8.75	0.188			11.5354	11.939	-0.403571		11.75	11.922	-0.172		11.312	10.687	8.5	11.932	10.638	8.737		11.5	10.437	9.062	11.93	10.674	9.03		11.562	10.312	8.562	11.929	10.639	8.781		11.625	11.875	11.75	12.023	11.982	11.904
11.5354	8.687	0	0	0		8.687	8.562	8.687	8.75	0.188			11.5354	11.939	-0.403571		11.75	11.922	-0.172		11.312	10.687	8.437	11.931	10.638	8.735		11.5	10.437	9.062	11.929	10.674	9.028		11.562	10.312	8.562	11.928	10.639	8.78		11.625	11.875	11.75	12.023	11.982	11.904
11.5354	8.75	0	0	0		8.75	8.562	8.687	8.75	0.188			11.5354	11.939	-0.403571		11.75	11.922	-0.172		11.312	10.687	8.437	11.931	10.637	8.734		11.5	10.437	9.062	11.929	10.674	9.026		11.562	10.312	8.562	11.928	10.639	8.778		11.625	11.875	11.75	12.022	11.982	11.904
11.5266	8.75	0	0	0		8.75	8.562	8.687	8.687	0.188			11.5266	11.938	-0.411429		11.75	11.922	-0.172		11.312	10.687	8.437	11.931	10.637	8.732		11.5	10.437	9.062	11.928	10.674	9.024		11.562	10.312	8.562	11.927	10.638	8.776		11.625	11.875	11.75	12.022	11.982	11.904
11.5354	8.75	0	0	0		8.75	8.562	8.687	8.75	0.188			11.5354	11.938	-0.402571		11.75	11.922	-0.172		11.312	10.687	8.437	11.93	10.637	8.73		11.5	10.437	9.062	11.928	10.673	9.023		11.562	10.312	8.562	11.927	10.638	8.774		11.625	11.875	11.75	12.021	11.982	11.904
11.5177	8.75	0	0	0		8.75	8.562	8.687	8.687	0.188			11.5177	11.937	-0.419286		11.75	11.922	-0.172		11.312	10.687	8.437	11.93	10.636	8.729		11.5	10.437	9.062	11.927	10.673	9.021		11.562	10.312	8.625	11.927	10.638	8.773		11.625	11.875	11.75	12.021	11.981	11.904
11.5266	8.75	0	0	0		8.75	8.562	8.687	8.687	0.188			11.5266	11.937	-0.410429		11.75	11.922	-0.172		11.312	10.687	8.437	11.929	10.636	8.727		11.5	10.437	9.062	11.927	10.673	9.019		11.562	10.312	8.562	11.926	10.637	8.771		11.625	11.875	11.75	12.021	11.981	11.905
11.5354	8.687	0	0	0		8.687	8.562	8.687	8.75	0.188			11.5354	11.936	-0.400571		11.75	11.922	-0.172		11.312	10.687	8.437	11.929	10.635	8.726		11.5	10.437	9.062	11.927	10.673	9.018		11.562	10.312	8.562	11.926	10.637	8.769		11.625	11.875	11.75	12.02	11.981	11.905
11.5354	8.687	0	0	0		8.687	8.562	8.687	8.75	0.188			11.5354	11.936	-0.400571		11.75	11.923	-0.173		11.312	10.687	8.437	11.928	10.635	8.724		11.5	10.437	9.062	11.926	10.672	9.016		11.562	10.312	8.562	11.925	10.637	8.767		11.625	11.875	11.75	12.02	11.981	11.905
11.5266	8.687	0	0	0		8.687	8.5	8.687	8.75	0.25			11.5266	11.935	-0.408429		11.75	11.923	-0.173		11.312	10.687	8.437	11.928	10.635	8.723		11.5	10.437	9.062	11.926	10.672	9.014		11.562	10.312	8.562	11.925	10.636	8.766		11.625	11.875	11.75	12.019	11.981	11.905
11.5354	8.687	0	0	0		8.687	8.5	8.687	8.75	0.25			11.5354	11.935	-0.399571		11.75	11.923	-0.173		11.312	10.687	8.437	11.928	10.634	8.721		11.5	10.437	9.062	11.925	10.672	9.013		11.562	10.312	8.562	11.924	10.636	8.764		11.625	11.875	11.75	12.019	11.981	11.905
11.5354	8.687	0	0	0		8.687	8.562	8.687	8.75	0.188			11.5354	11.934	-0.398571		11.75	11.923	-0.173		11.312	10.687	8.437	11.927	10.634	8.72		11.5	10.437	9.062	11.925	10.672	9.011		11.562	10.312	8.562	11.924	10.636	8.762		11.625	11.875	11.75	12.018	11.981	11.905
11.5354	8.687	0	0	0		8.687	8.5	8.625	8.75	0.25			11.5354	11.934	-0.398571		11.75	11.923	-0.173		11.312	10.687	8.437	11.927	10.634	8.718		11.5	10.437	9.062	11.924	10.671	9.009		11.562	10.312	8.562	11.924	10.635	8.76		11.625	11.875	11.75	12.018	11.981	11.905
11.5354	8.687	0	0	0		8.687	8.5	8.625	8.75	0.25			11.5354	11.933	-0.397571		11.75	11.923	-0.173		11.312	10.687	8.437	11.926	10.633	8.716		11.5	10.437	9.062	11.924	10.671	9.008		11.562	10.312	8.562	11.923	10.635	8.759		11.625	11.875	11.75	12.018	11.98	11.905
11.5443	8.687	0	0	0		8.687	8.5	8.625	8.75	0.25			11.5443	11.933	-0.388714		11.75	11.923	-0.173		11.312	10.687	8.437	11.926	10.633	8.715		11.5	10.437	9.062	11.923	10.671	9.006		11.562	10.25	8.562	11.923	10.635	8.757		11.625	11.875	11.75	12.017	11.98	11.906
11.5354	8.687	0	0	0		8.687	8.5	8.625	8.75	0.25			11.5354	11.932	-0.396571		11.75	11.923	-0.173		11.312	10.687	8.437	11.925	10.633	8.713		11.5	10.437	9	11.923	10.671	9.004		11.562	10.312	8.562	11.922	10.634	8.755		11.625	11.875	11.75	12.017	11.98	11.906
11.5354	8.687	0	0	0		8.687	8.5	8.625	8.75	0.25			11.5354	11.932	-0.396571		11.75	11.923	-0.173		11.312	10.687	8.437	11.925	10.632	8.712		11.5	10.437	9.062	11.923	10.67	9.002		11.562	10.312	8.562	11.922	10.634	8.754		11.625	11.875	11.75	12.016	11.98	11.906
11.5354	8.687	0	0	0		8.687	8.5	8.625	8.75	0.25			11.5354	11.931	-0.395571		11.75	11.923	-0.173		11.312	10.687	8.437	11.924	10.632	8.71		11.5	10.437	9.062	11.922	10.67	9.001		11.562	10.312	8.562	11.921	10.634	8.752		11.625	11.875	11.75	12.016	11.98	11.906
11.5354	8.687	0	0	0		8.687	8.5	8.625	8.75	0.25			11.5354	11.931	-0.395571		11.75	11.923	-0.173		11.312	10.687	8.437	11.924	10.632	8.709		11.5	10.437	9	11.922	10.67	8.999		11.562	10.312	8.562	11.921	10.633	8.75		11.625	11.875	11.75	12.016	11.98	11.906
11.5354	8.687	0	0	0		8.687	8.5	8.625	8.75	0.25			11.5354	11.931	-0.395571		11.75	11.924	-0.174		11.312	10.687	8.437	11.924	10.631	8.707		11.5	10.437	9.062	11.921	10.67	8.997		11.562	10.312	8.562	11.92	10.633	8.748		11.625	11.875	11.75	12.015	11.98	11.906
11.5266	8.625	0	0	0		8.625	8.5	8.625	8.75	0.25			11.5266	11.93	-0.403429		11.75	11.924	-0.174		11.312	10.687	8.437	11.923	10.631	8.706		11.5	10.437	9	11.921	10.669	8.996		11.562	10.312	8.562	11.92	10.633	8.747		11.625	11.875	11.75	12.015	11.98	11.906
11.5354	8.625	0	0	0		8.625	8.5	8.625	8.75	0.25			11.5354	11.93	-0.394571		11.75	11.924	-0.174		11.312	10.687	8.437	11.923	10.63	8.704		11.5	10.437	9	11.92	10.669	8.994		11.562	10.312	8.562	11.92	10.632	8.745		11.625	11.875	11.75	12.014	11.98	11.907
11.5354	8.625	0	0	0		8.625	8.5	8.625	8.75	0.25			11.5354	11.929	-0.393571		11.75	11.924	-0.174		11.312	10.687	8.437	11.922	10.63	8.702		11.5	10.437	9	11.92	10.669	8.992		11.562	10.312	8.562	11.919	10.632	8.743		11.625	11.875	11.75	12.014	11.979	11.907
11.5354	8.625	0	0	0		8.625	8.5	8.625	8.75	0.25			11.5354	11.929	-0.393571		11.75	11.924	-0.174		11.312	10.687	8.437	11.922	10.63	8.701		11.5	10.437	9	11.92	10.669	8.991		11.562	10.25	8.562	11.919	10.632	8.741		11.625	11.875	11.75	12.014	11.979	11.907
11.5354	8.625	0	0	0		8.625	8.5	8.625	8.75	0.25			11.5354	11.928	-0.392571		11.75	11.924	-0.174		11.312	10.687	8.437	11.921	10.629	8.699		11.5	10.437	9	11.919	10.669	8.989		11.562	10.312	8.562	11.918	10.631	8.74		11.625	11.875	11.75	12.013	11.979	11.907
11.5354	8.625	0	0	0		8.625	8.5	8.625	8.687	0.187			11.5354	11.928	-0.392571		11.75	11.924	-0.174		11.312	10.687	8.437	11.921	10.629	8.698		11.5	10.437	9	11.919	10.668	8.987		11.562	10.312	8.562	11.918	10.631	8.738		11.625	11.875	11.75	12.013	11.979	11.907
11.5354	8.625	0	0	0		8.625	8.5	8.625	8.687	0.187			11.5354	11.927	-0.391571		11.75	11.924	-0.174		11.312	10.687	8.375	11.921	10.629	8.696		11.5	10.437	9	11.918	10.668	8.985		11.562	10.312	8.5	11.917	10.631	8.736		11.625	11.875	11.75	12.012	11.979	11.907
11.5354	8.625	0	0	0		8.625	8.437	8.625	8.687	0.25			11.5354	11.927	-0.391571		11.75	11.924	-0.174		11.312	10.687	8.375	11.92	10.628	8.695		11.5	10.437	9	11.918	10.668	8.984		11.562	10.25	8.562	11.917	10.63	8.734		11.625	11.875	11.75	12.012	11.979	11.907
11.5354	8.625	0	0	0		8.625	8.437	8.562	8.687	0.25			11.5354	11.926	-0.390571		11.75	11.924	-0.174		11.312	10.687	8.375	11.92	10.628	8.693		11.5	10.437	9	11.917	10.668	8.982		11.562	10.25	8.5	11.916	10.63	8.733		11.625	11.875	11.75	12.012	11.979	11.907
11.5354	8.625	0	0	0		8.625	8.437	8.562	8.687	0.25			11.5354	11.926	-0.390571		11.75	11.924	-0.174		11.312	10.687	8.375	11.919	10.628	8.692		11.5	10.437	9	11.917	10.667	8.98		11.562	10.312	8.5	11.916	10.63	8.731		11.625	11.875	11.75	12.011	11.979	11.908
11.5443	8.625	0	0	0		8.625	8.437	8.562	8.687	0.25			11.5443	11.925	-0.380714		11.75	11.925	-0.175		11.312	10.687	8.375	11.919	10.627	8.69		11.5	10.437	9	11.916	10.667	8.979		11.562	10.312	8.5	11.916	10.629	8.729		11.625	11.875	11.75	12.011	11.979	11.908
11.5443	8.625	0	0	0		8.625	8.437	8.562	8.687	0.25			11.5443	11.925	-0.380714		11.75	11.925	-0.175		11.312	10.687	8.375	11.918	10.627	8.688		11.5	10.437	9	11.916	10.667	8.977		11.562	10.25	8.5	11.915	10.629	8.728		11.625	11.875	11.75	12.01	11.978	11.908
11.5354	8.625	0	0	0		8.625	8.437	8.562	8.687	0.25			11.5354	11.924	-0.388571		11.75	11.925	-0.175		11.312	10.687	8.375	11.918	10.626	8.687		11.5	10.437	9	11.916	10.667	8.975		11.562	10.312	8.5	11.915	10.629	8.726		11.625	11.875	11.75	12.01	11.978	11.908
11.5443	8.625	0	0	0		8.625	8.437	8.562	8.625	0.188			11.5443	11.924	-0.379714		11.75	11.925	-0.175		11.312	10.687	8.375	11.917	10.626	8.685		11.5	10.437	9	11.915	10.666	8.974		11.562	10.25	8.5	11.914	10.628	8.724		11.625	11.875	11.75	12.01	11.978	11.908
11.5443	8.625	0	0	0		8.625	8.437	8.562	8.687	0.25			11.5443	11.923	-0.378714		11.75	11.925	-0.175		11.312	10.687	8.375	11.917	10.626	8.684		11.5	10.437	9	11.915	10.666	8.972		11.562	10.25	8.5	11.914	10.628	8.722		11.625	11.875	11.75	12.009	11.978	11.908
11.5443	8.625	0	0	0		8.625	8.437	8.562	8.687	0.25			11.5443	11.923	-0.378714		11.75	11.925	-0.175		11.312	10.687	8.375	11.917	10.625	8.682		11.5	10.437	9	11.914	10.666	8.97		11.562	10.25	8.5	11.913	10.628	8.721		11.625	11.875	11.75	12.009	11.978	11.908
11.5531	8.625	0	0	0		8.625	8.437	8.562	8.687	0.25			11.5531	11.923	-0.369857		11.75	11.925	-0.175		11.312	10.687	8.375	11.916	10.625	8.681		11.5	10.437	9	11.914	10.666	8.968		11.562	10.25	8.5	11.913	10.627	8.719		11.625	11.875	11.75	12.008	11.978	11.908
11.5354	8.625	0	0	0		8.625	8.437	8.562	8.625	0.188			11.5354	11.922	-0.386571		11.75	11.925	-0.175		11.312	10.687	8.375	11.916	10.625	8.679		11.5	10.437	9	11.913	10.665	8.967		11.562	10.25	8.5	11.913	10.627	8.717		11.625	11.875	11.75	12.008	11.978	11.909
11.5354	8.625	0	0	0		8.625	8.437	8.562	8.625	0.188			11.5354	11.922	-0.386571		11.75	11.925	-0.175		11.312	10.687	8.375	11.915	10.624	8.678		11.5	10.437	9	11.913	10.665	8.965		11.562	10.25	8.5	11.912	10.627	8.715		11.625	11.875	11.75	12.007	11.978	11.909
11.5531	8.625	0	0	0		8.625	8.437	8.562	8.625	0.188			11.5531	11.921	-0.367857		11.75	11.925	-0.175		11.312	10.687	8.312	11.915	10.624	8.676		11.5	10.437	9	11.912	10.665	8.963		11.562	10.25	8.5	11.912	10.626	8.714		11.625	11.875	11.75	12.007	11.977	11.909
11.5443	8.625	0	0	0		8.625	8.437	8.562	8.625	0.188			11.5443	11.921	-0.376714		11.75	11.925	-0.175		11.312	10.687	8.312	11.914	10.624	8.674		11.5	10.437	9	11.912	10.665	8.962		11.562	10.25	8.5	11.911	10.626	8.712		11.625	11.875	11.75	12.007	11.977	11.909
11.5531	8.625	0	0	0		8.625	8.437	8.562	8.625	0.188			11.5531	11.92	-0.366857		11.75	11.926	-0.176		11.312	10.687	8.312	11.914	10.623	8.673		11.5	10.437	9	11.912	10.664	8.96		11.562	10.25	8.5	11.911	10.626	8.71		11.625	11.875	11.75	12.006	11.977	11.909
11.5443	8.625	0	0	0		8.625	8.437	8.562	8.625	0.188			11.5443	11.92	-0.375714		11.75	11.926	-0.176		11.312	10.687	8.312	11.914	10.623	8.671		11.5	10.437	9	11.911	10.664	8.958		11.562	10.25	8.437	11.91	10.625	8.708		11.625	11.875	11.75	12.006	11.977	11.909
11.5443	8.625	0	0	0		8.625	8.437	8.562	8.625	0.188			11.5443	11.919	-0.374714		11.75	11.926	-0.176		11.312	10.687	8.312	11.913	10.623	8.67		11.5	10.437	9	11.911	10.664	8.957		11.562	10.312	8.5	11.91	10.625	8.707		11.625	11.875	11.75	12.005	11.977	11.909
11.5443	8.625	0	0	0		8.625	8.437	8.562	8.625	0.188			11.5443	11.919	-0.374714		11.75	11.926	-0.176		11.312	10.687	8.312	11.913	10.622	8.668		11.5	10.437	9	11.91	10.664	8.955		11.562	10.25	8.5	11.909	10.625	8.705		11.625	11.875	11.75	12.005	11.977	11.909
11.5443	8.625	0	0	0		8.625	8.437	8.562	8.625	0.188			11.5443	11.918	-0.373714		11.75	11.926	-0.176		11.312	10.687	8.312	11.912	10.622	8.667		11.5	10.437	9	11.91	10.663	8.953		11.562	10.25	8.5	11.909	10.624	8.703		11.625	11.875	11.75	12.005	11.977	11.91
11.5531	8.625	0	0	0		8.625	8.437	8.562	8.625	0.188			11.5531	11.918	-0.364857		11.75	11.926	-0.176		11.312	10.687	8.312	11.912	10.621	8.665		11.5	10.437	9	11.909	10.663	8.952		11.562	10.25	8.5	11.909	10.624	8.702		11.625	11.875	11.75	12.004	11.977	11.91
11.5443	8.625	0	0	0		8.625	8.437	8.562	8.625	0.188			11.5443	11.917	-0.372714		11.75	11.926	-0.176		11.312	10.687	8.312	11.911	10.621	8.664		11.5	10.437	9	11.909	10.663	8.95		11.562	10.25	8.437	11.908	10.623	8.7		11.625	11.875	11.75	12.004	11.977	11.91
11.5443	8.562	0	0	0		8.562	8.437	8.562	8.625	0.188			11.5443	11.917	-0.372714		11.75	11.926	-0.176		11.312	10.687	8.312	11.911	10.621	8.662		11.5	10.437	9	11.908	10.663	8.948		11.562	10.25	8.5	11.908	10.623	8.698		11.625	11.875	11.75	12.003	11.976	11.91
11.5443	8.562	0	0	0		8.562	8.375	8.5	8.625	0.25			11.5443	11.916	-0.371714		11.75	11.926	-0.176		11.312	10.687	8.312	11.91	10.62	8.66		11.5	10.437	9	11.908	10.662	8.946		11.562	10.25	8.437	11.907	10.623	8.696		11.625	11.875	11.75	12.003	11.976	11.91
11.5354	8.562	0	0	0		8.562	8.375	8.5	8.625	0.25			11.5354	11.916	-0.380571		11.75	11.926	-0.176		11.312	10.687	8.312	11.91	10.62	8.659		11.5	10.437	9	11.908	10.662	8.945		11.562	10.25	8.437	11.907	10.622	8.695		11.625	11.875	11.75	12.003	11.976	11.91
11.5443	8.562	0	0	0		8.562	8.375	8.562	8.562	0.187			11.5443	11.915	-0.370714		11.75	11.926	-0.176		11.312	10.687	8.312	11.91	10.62	8.657		11.5	10.437	9	11.907	10.662	8.943		11.562	10.25	8.437	11.906	10.622	8.693		11.625	11.875	11.75	12.002	11.976	11.91
11.5531	8.562	0	0	0		8.562	8.375	8.562	8.562	0.187			11.5531	11.915	-0.361857		11.75	11.927	-0.177		11.312	10.687	8.312	11.909	10.619	8.656		11.5	10.437	9	11.907	10.662	8.941		11.562	10.25	8.437	11.906	10.622	8.691		11.625	11.875	11.75	12.002	11.976	11.911
11.5443	8.562	0	0	0		8.562	8.375	8.5	8.562	0.187			11.5443	11.915	-0.370714		11.75	11.927	-0.177		11.312	10.687	8.312	11.909	10.619	8.654		11.5	10.437	8.937	11.906	10.661	8.94		11.562	10.25	8.437	11.906	10.621	8.689		11.625	11.875	11.75	12.001	11.976	11.911
11.5443	8.562	0	0	0		8.562	8.375	8.562	8.562	0.187			11.5443	11.914	-0.369714		11.75	11.927	-0.177		11.375	10.687	8.25	11.908	10.619	8.653		11.5	10.437	9	11.906	10.661	8.938		11.562	10.25	8.437	11.905	10.621	8.688		11.625	11.875	11.75	12.001	11.976	11.911
11.5443	8.562	0	0	0		8.562	8.375	8.562	8.562	0.187			11.5443	11.914	-0.369714		11.75	11.927	-0.177		11.312	10.687	8.25	11.908	10.618	8.651		11.5	10.437	9	11.905	10.661	8.936		11.562	10.25	8.437	11.905	10.621	8.686		11.687	11.875	11.75	12.001	11.976	11.911
11.5443	8.625	0	0	0		8.625	8.375	8.562	8.562	0.25			11.5443	11.913	-0.368714		11.75	11.927	-0.177		11.312	10.687	8.25	11.907	10.618	8.65		11.5	10.437	9	11.905	10.661	8.935		11.562	10.25	8.437	11.904	10.62	8.684		11.625	11.875	11.75	12	11.976	11.911
11.5354	8.625	0	0	0		8.625	8.375	8.562	8.562	0.25			11.5354	11.913	-0.377571		11.75	11.927	-0.177		11.312	10.687	8.25	11.907	10.617	8.648		11.5	10.437	8.937	11.904	10.661	8.933		11.562	10.25	8.437	11.904	10.62	8.682		11.625	11.875	11.75	12	11.975	11.911
11.5443	8.625	0	0	0		8.625	8.375	8.562	8.562	0.25			11.5443	11.912	-0.367714		11.75	11.927	-0.177		11.312	10.687	8.25	11.906	10.617	8.646		11.5	10.437	8.937	11.904	10.66	8.931		11.562	10.25	8.437	11.903	10.62	8.681		11.687	11.875	11.75	11.999	11.975	11.911
11.5354	8.625	0	0	0		8.625	8.375	8.562	8.562	0.25			11.5354	11.912	-0.376571		11.75	11.927	-0.177		11.312	10.687	8.25	11.906	10.617	8.645		11.5	10.437	8.937	11.904	10.66	8.929		11.562	10.25	8.437	11.903	10.619	8.679		11.625	11.875	11.75	11.999	11.975	11.911
11.5354	8.562	0	0	0		8.562	8.375	8.562	8.5	0.187			11.5354	11.911	-0.375571		11.75	11.927	-0.177		11.312	10.687	8.25	11.906	10.616	8.643		11.5	10.437	8.937	11.903	10.66	8.928		11.562	10.25	8.437	11.902	10.619	8.677		11.625	11.875	11.75	11.999	11.975	11.912
11.5354	8.562	0	0	0		8.562	8.375	8.562	8.5	0.187			11.5354	11.911	-0.375571		11.75	11.927	-0.177		11.312	10.687	8.25	11.905	10.616	8.642		11.5	10.437	8.937	11.903	10.66	8.926		11.562	10.25	8.437	11.902	10.619	8.675		11.625	11.875	11.75	11.998	11.975	11.912
11.5531	8.562	0	0	0		8.562	8.375	8.5	8.562	0.187			11.5531	11.91	-0.356857		11.75	11.927	-0.177		11.312	10.687	8.25	11.905	10.616	8.64		11.5	10.437	8.937	11.902	10.659	8.924		11.562	10.25	8.437	11.902	10.618	8.674		11.687	11.875	11.75	11.998	11.975	11.912
11.5531	8.562	0	0	0		8.562	8.375	8.5	8.562	0.187			11.5531	11.91	-0.356857		11.75	11.928	-0.178		11.312	10.687	8.25	11.904	10.615	8.639		11.5	10.437	8.937	11.902	10.659	8.923		11.562	10.25	8.437	11.901	10.618	8.672		11.687	11.875	11.75	11.997	11.975	11.912
11.5531	8.562	0	0	0		8.562	8.375	8.5	8.5	0.187			11.5531	11.909	-0.355857		11.75	11.928	-0.178		11.312	10.687	8.25	11.904	10.615	8.637		11.5	10.437	8.937	11.901	10.659	8.921		11.562	10.25	8.437	11.901	10.618	8.67		11.625	11.875	11.75	11.997	11.975	11.912
11.5443	8.562	0	0	0		8.562	8.375	8.5	8.562	0.187			11.5443	11.909	-0.364714		11.75	11.928	-0.178		11.312	10.687	8.25	11.903	10.615	8.635		11.5	10.437	8.937	11.901	10.659	8.919		11.562	10.25	8.437	11.9	10.617	8.668		11.687	11.875	11.75	11.996	11.974	11.912
11.5443	8.562	0	0	0		8.562	8.375	8.5	8.562	0.187			11.5443	11.908	-0.363714		11.75	11.928	-0.178		11.312	10.687	8.25	11.903	10.614	8.632		11.5	10.437	8.937	11.9	10.658	8.917		11.562	10.25	8.437	11.9	10.617	8.666		11.625	11.875	11.75	11.996	11.974	11.912
11.5443	8.562	0	0	0		8.562	8.375	8.5	8.562	0.187			11.5443	11.908	-0.363714		11.75	11.928	-0.178		11.312	10.687	8.25	11.903	10.614	8.63		11.5	10.437	8.937	11.9	10.658	8.915		11.562	10.25	8.437	11.899	10.616	8.663		11.687	11.875	11.75	11.996	11.974	11.912
11.5443	8.562	0	0	0		8.562	8.375	8.5	8.5	0.187			11.5443	11.907	-0.362714		11.75	11.928	-0.178		11.312	10.687	8.25	11.902	10.613	8.627		11.5	10.437	8.937	11.9	10.658	8.913		11.562	10.25	8.437	11.899	10.616	8.661		11.625	11.875	11.75	11.995	11.974	11.912
11.5354	8.562	0	0	0		8.562	8.375	8.5	8.5	0.187			11.5354	11.907	-0.371571		11.75	11.928	-0.178		11.312	10.625	8.187	11.902	10.613	8.624		11.5	10.437	8.937	11.899	10.657	8.911		11.562	10.25	8.437	11.898	10.616	8.658		11.625	11.875	11.75	11.995	11.974	11.913
11.5354	8.562	0	0	0		8.562	8.375	8.5	8.5	0.187			11.5354	11.906	-0.370571		11.75	11.928	-0.178		11.312	10.687	8.187	11.901	10.612	8.622		11.5	10.437	8.937	11.899	10.657	8.909		11.562	10.25	8.437	11.898	10.615	8.655		11.687	11.875	11.75	11.994	11.974	11.913
11.5443	8.562	0	0	0		8.562	8.375	8.5	8.5	0.187			11.5443	11.906	-0.361714		11.75	11.928	-0.178		11.312	10.625	8.187	11.901	10.612	8.619		11.5	10.437	8.937	11.898	10.657	8.907		11.562	10.25	8.437	11.898	10.615	8.653		11.687	11.875	11.75	11.994	11.974	11.913
11.5443	8.562	0	0	0		8.562	8.375	8.5	8.5	0.187			11.5443	11.905	-0.360714		11.75	11.928	-0.178		11.312	10.687	8.187	11.9	10.611	8.616		11.5	10.437	8.937	11.898	10.656	8.905		11.562	10.25	8.375	11.897	10.614	8.65		11.687	11.875	11.75	11.994	11.974	11.913
11.5443	8.562	0	0	0		8.562	8.375	8.5	8.437	0.187			11.5443	11.905	-0.360714		11.75	11.928	-0.178		11.312	10.687	8.187	11.9	10.611	8.613		11.5	10.437	8.937	11.897	10.656	8.903		11.562	10.25	8.437	11.897	10.614	8.648		11.687	11.875	11.75	11.993	11.973	11.913
11.5443	8.562	0	0	0		8.562	8.375	8.5	8.5	0.187			11.5443	11.904	-0.359714		11.75	11.928	-0.178		11.312	10.625	8.187	11.899	10.61	8.611		11.5	10.437	8.937	11.897	10.656	8.901		11.562	10.25	8.375	11.896	10.613	8.645		11.625	11.875	11.75	11.993	11.973	11.913
11.5531	8.562	0	0	0		8.562	8.312	8.5	8.437	0.25			11.5531	11.904	-0.350857		11.75	11.928	-0.178		11.312	10.625	8.187	11.899	10.61	8.608		11.5	10.437	8.937	11.896	10.655	8.899		11.562	10.25	8.375	11.896	10.613	8.643		11.687	11.875	11.75	11.992	11.973	11.913
11.562	8.562	0	0	0		8.562	8.312	8.5	8.437	0.25			11.562	11.903	-0.341		11.75	11.928	-0.178		11.312	10.687	8.187	11.898	10.61	8.605		11.5	10.437	8.937	11.896	10.655	8.897		11.562	10.25	8.375	11.895	10.613	8.64		11.687	11.875	11.75	11.992	11.973	11.913
11.5531	8.5	0	0	0		8.5	8.312	8.437	8.437	0.188			11.5531	11.903	-0.349857		11.75	11.928	-0.178		11.375	10.625	8.187	11.898	10.609	8.602		11.5	10.437	8.937	11.896	10.655	8.895		11.562	10.25	8.375	11.895	10.612	8.638		11.687	11.875	11.75	11.992	11.973	11.913
11.562	8.5	0	0	0		8.5	8.25	8.437	8.437	0.25			11.562	11.902	-0.34		11.75	11.928	-0.178		11.312	10.625	8.187	11.898	10.609	8.6		11.5	10.437	8.937	11.895	10.654	8.893		11.562	10.25	8.375	11.894	10.612	8.635		11.687	11.875	11.75	11.991	11.973	11.914
11.5443	8.5	0	0	0		8.5	8.312	8.437	8.437	0.188			11.5443	11.902	-0.357714		11.75	11.928	-0.178		11.312	10.625	8.187	11.897	10.608	8.597		11.5	10.437	8.937	11.895	10.654	8.891		11.562	10.25	8.375	11.894	10.611	8.632		11.687	11.875	11.75	11.991	11.973	11.914
11.5531	8.5	0	0	0		8.5	8.25	8.437	8.437	0.25			11.5531	11.901	-0.347857		11.75	11.928	-0.178		11.312	10.687	8.125	11.897	10.608	8.594		11.5	10.437	8.937	11.894	10.654	8.889		11.562	10.25	8.375	11.894	10.611	8.63		11.687	11.875	11.75	11.99	11.973	11.914
11.5443	8.5	0	0	0		8.5	8.25	8.437	8.375	0.25			11.5443	11.901	-0.356714		11.75	11.928	-0.178		11.312	10.625	8.125	11.896	10.607	8.592		11.5	10.437	8.937	11.894	10.653	8.887		11.562	10.25	8.375	11.893	10.61	8.627		11.625	11.875	11.75	11.99	11.972	11.914
11.5531	8.5	0	0	0		8.5	8.25	8.437	8.375	0.25			11.5531	11.9	-0.346857		11.75	11.929	-0.179		11.312	10.625	8.125	11.896	10.607	8.589		11.5	10.437	8.937	11.893	10.653	8.885		11.562	10.25	8.375	11.893	10.61	8.625		11.687	11.875	11.75	11.989	11.972	11.914
11.5531	8.437	0	0	0		8.437	8.25	8.437	8.375	0.187			11.5531	11.9	-0.346857		11.75	11.929	-0.179		11.312	10.625	8.125	11.895	10.606	8.586		11.562	10.437	8.937	11.893	10.653	8.884		11.562	10.25	8.375	11.892	10.61	8.622		11.687	11.875	11.75	11.989	11.972	11.914
11.5443	8.437	0	0	0		8.437	8.25	8.437	8.375	0.187			11.5443	11.899	-0.354714		11.75	11.929	-0.179		11.312	10.625	8.125	11.895	10.606	8.583		11.5	10.437	8.937	11.892	10.653	8.882		11.562	10.25	8.375	11.892	10.609	8.62		11.687	11.937	11.75	11.989	11.972	11.914
11.5531	8.437	0	0	0		8.437	8.25	8.437	8.375	0.187			11.5531	11.899	-0.345857		11.75	11.929	-0.179		11.375	10.625	8.125	11.894	10.605	8.581		11.5	10.437	8.937	11.892	10.652	8.88		11.562	10.25	8.375	11.891	10.609	8.617		11.687	11.875	11.75	11.988	11.972	11.914
11.5443	8.437	0	0	0		8.437	8.25	8.437	8.375	0.187			11.5443	11.898	-0.353714		11.75	11.929	-0.179		11.375	10.625	8.125	11.894	10.605	8.578		11.5	10.437	8.937	11.892	10.652	8.878		11.562	10.25	8.375	11.891	10.608	8.615		11.687	11.875	11.75	11.988	11.972	11.914
11.5531	8.437	0	0	0		8.437	8.25	8.437	8.375	0.187			11.5531	11.898	-0.344857		11.75	11.929	-0.179		11.312	10.625	8.125	11.894	10.605	8.575		11.5	10.437	8.875	11.891	10.652	8.876		11.562	10.25	8.375	11.89	10.608	8.612		11.687	11.875	11.75	11.987	11.972	11.914
11.5531	8.437	0	0	0		8.437	8.25	8.437	8.375	0.187			11.5531	11.898	-0.344857		11.75	11.929	-0.179		11.375	10.625	8.125	11.893	10.604	8.573		11.5	10.437	8.937	11.891	10.651	8.874		11.562	10.25	8.375	11.89	10.607	8.609		11.687	11.875	11.75	11.987	11.972	11.915
11.5531	8.437	0	0	0		8.437	8.25	8.437	8.375	0.187			11.5531	11.897	-0.343857		11.75	11.929	-0.179		11.312	10.625	8.125	11.893	10.604	8.57		11.5	10.437	8.937	11.89	10.651	8.872		11.562	10.25	8.375	11.89	10.607	8.607		11.687	11.875	11.75	11.987	11.971	11.915
11.5531	8.5	0	0	0		8.5	8.25	8.437	8.375	0.25			11.5531	11.897	-0.343857		11.75	11.929	-0.179		11.312	10.625	8.125	11.892	10.603	8.567		11.5	10.5	8.875	11.89	10.651	8.87		11.562	10.25	8.375	11.889	10.607	8.604		11.687	11.875	11.75	11.986	11.971	11.915
11.562	8.5	0	0	0		8.5	8.25	8.437	8.375	0.25			11.562	11.896	-0.334		11.75	11.929	-0.179		11.312	10.625	8.125	11.892	10.603	8.564		11.5	10.437	8.875	11.889	10.65	8.868		11.562	10.25	8.375	11.889	10.606	8.602		11.687	11.875	11.75	11.986	11.971	11.915
11.562	8.437	0	0	0		8.437	8.187	8.375	8.375	0.25			11.562	11.896	-0.334		11.75	11.929	-0.179		11.312	10.625	8.125	11.891	10.602	8.562		11.562	10.437	8.875	11.889	10.65	8.866		11.562	10.25	8.312	11.888	10.606	8.599		11.687	11.875	11.75	11.985	11.971	11.915
11.5531	8.437	0	0	0		8.437	8.187	8.375	8.375	0.25			11.5531	11.895	-0.341857		11.75	11.929	-0.179		11.375	10.625	8.125	11.891	10.602	8.559		11.5	10.437	8.937	11.888	10.65	8.864		11.562	10.25	8.312	11.888	10.605	8.597		11.687	11.875	11.75	11.985	11.971	11.915
11.562	8.437	0	0	0		8.437	8.187	8.375	8.312	0.25			11.562	11.895	-0.333		11.75	11.929	-0.179		11.312	10.625	8.125	11.89	10.601	8.556		11.5	10.437	8.875	11.888	10.649	8.862		11.562	10.25	8.312	11.887	10.605	8.594		11.687	11.875	11.75	11.984	11.971	11.915
11.5531	8.437	0	0	0		8.437	8.187	8.375	8.312	0.25			11.5531	11.894	-0.340857		11.75	11.929	-0.179		11.375	10.625	8.062	11.89	10.601	8.554		11.5	10.437	8.875	11.887	10.649	8.86		11.562	10.25	8.312	11.887	10.604	8.592		11.687	11.875	11.75	11.984	11.971	11.915
11.562	8.437	0	0	0		8.437	8.187	8.375	8.312	0.25			11.562	11.894	-0.332		11.75	11.929	-0.179		11.375	10.625	8.062	11.89	10.601	8.551		11.5	10.437	8.875	11.887	10.649	8.858		11.562	10.25	8.312	11.886	10.604	8.589		11.687	11.875	11.75	11.984	11.971	11.915
11.562	8.437	0	0	0		8.437	8.187	8.375	8.312	0.25			11.562	11.893	-0.331		11.75	11.929	-0.179		11.312	10.625	8.062	11.889	10.6	8.548		11.5	10.437	8.875	11.887	10.648	8.856		11.562	10.25	8.312	11.886	10.604	8.586		11.687	11.875	11.75	11.983	11.97	11.915
11.562	8.437	0	0	0		8.437	8.187	8.375	8.312	0.25			11.562	11.893	-0.331		11.75	11.929	-0.179		11.312	10.625	8.062	11.889	10.6	8.545		11.5	10.437	8.875	11.886	10.648	8.854		11.562	10.25	8.312	11.885	10.603	8.584		11.687	11.875	11.75	11.983	11.97	11.916
11.562	8.437	0	0	0		8.437	8.187	8.375	8.312	0.25			11.562	11.892	-0.33		11.75	11.929	-0.179		11.375	10.625	8.062	11.888	10.599	8.543		11.562	10.437	8.875	11.886	10.648	8.852		11.562	10.25	8.312	11.885	10.603	8.581		11.687	11.875	11.75	11.982	11.97	11.916
11.562	8.437	0	0	0		8.437	8.187	8.375	8.312	0.25			11.562	11.892	-0.33		11.75	11.929	-0.179		11.312	10.625	8.062	11.888	10.599	8.54		11.5	10.437	8.875	11.885	10.647	8.85		11.562	10.25	8.312	11.885	10.602	8.579		11.687	11.875	11.75	11.982	11.97	11.916
11.562	8.437	0	0	0		8.437	8.25	8.375	8.312	0.187			11.562	11.891	-0.329		11.75	11.929	-0.179		11.312	10.625	8.062	11.887	10.598	8.537		11.5	10.437	8.875	11.885	10.647	8.848		11.562	10.25	8.312	11.884	10.602	8.576		11.687	11.875	11.75	11.982	11.97	11.916
11.5531	8.5	0	0	0		8.5	8.187	8.375	8.312	0.313			11.5531	11.891	-0.337857		11.75	11.929	-0.179		11.375	10.625	8.062	11.887	10.598	8.535		11.562	10.437	8.875	11.884	10.647	8.846		11.562	10.25	8.312	11.884	10.601	8.574		11.687	11.875	11.75	11.981	11.97	11.916
11.562	8.5	0	0	0		8.5	8.187	8.375	8.312	0.313			11.562	11.89	-0.328		11.75	11.929	-0.179		11.375	10.625	8.062	11.886	10.597	8.532		11.5	10.437	8.875	11.884	10.647	8.844		11.562	10.25	8.312	11.883	10.601	8.571		11.687	11.875	11.75	11.981	11.97	11.916
11.5531	8.5	0	0	0		8.5	8.187	8.375	8.312	0.313			11.5531	11.89	-0.336857		11.75	11.93	-0.18		11.312	10.625	8	11.886	10.597	8.529		11.5	10.437	8.875	11.883	10.646	8.842		11.562	10.25	8.312	11.883	10.6	8.569		11.625	11.875	11.75	11.98	11.97	11.916
11.562	8.5	0	0	0		8.5	8.25	8.375	8.312	0.25			11.562	11.889	-0.327		11.75	11.93	-0.18		11.312	10.625	8	11.886	10.596	8.526		11.5	10.437	8.875	11.883	10.646	8.84		11.562	10.25	8.312	11.882	10.6	8.566		11.687	11.875	11.75	11.98	11.969	11.916
11.562	8.437	0	0	0		8.437	8.25	8.375	8.25	0.187			11.562	11.889	-0.327		11.75	11.93	-0.18		11.312	10.625	8	11.885	10.596	8.524		11.5	10.437	8.875	11.883	10.646	8.838		11.562	10.25	8.25	11.882	10.6	8.564		11.687	11.875	11.75	11.979	11.969	11.916
11.562	8.437	0	0	0		8.437	8.25	8.375	8.25	0.187			11.562	11.888	-0.326		11.75	11.93	-0.18		11.312	10.625	8	11.885	10.596	8.521		11.562	10.437	8.875	11.882	10.645	8.836		11.562	10.25	8.312	11.881	10.599	8.561		11.687	11.875	11.75	11.979	11.969	11.916
11.562	8.5	0	0	0		8.5	8.187	8.375	8.25	0.313			11.562	11.888	-0.326		11.75	11.93	-0.18		11.312	10.625	8	11.884	10.595	8.518		11.5	10.437	8.875	11.882	10.645	8.834		11.562	10.25	8.312	11.881	10.599	8.558		11.687	11.875	11.75	11.979	11.969	11.917
11.5621	8.5	0	0	0		8.5	8.187	8.437	8.25	0.313			11.5621	11.887	-0.324857		11.75	11.93	-0.18		11.375	10.625	8	11.884	10.595	8.515		11.562	10.437	8.875	11.881	10.645	8.832		11.625	10.25	8.312	11.881	10.598	8.556		11.687	11.875	11.75	11.978	11.969	11.917
11.562	8.5	0	0	0		8.5	8.25	8.437	8.25	0.25			11.562	11.887	-0.325		11.75	11.93	-0.18		11.312	10.625	8	11.883	10.594	8.513		11.5	10.437	8.875	11.881	10.644	8.83		11.562	10.25	8.312	11.88	10.598	8.553		11.687	11.875	11.75	11.978	11.969	11.917
11.562	8.5	0	0	0		8.5	8.25	8.437	8.25	0.25			11.562	11.886	-0.324		11.75	11.93	-0.18		11.375	10.625	8	11.883	10.594	8.51		11.562	10.437	8.875	11.88	10.644	8.828		11.562	10.25	8.312	11.88	10.597	8.551		11.687	11.937	11.75	11.977	11.969	11.917
11.571	8.5	0	0	0		8.5	8.25	8.437	8.25	0.25			11.571	11.886	-0.315		11.75	11.93	-0.18		11.312	10.625	8	11.882	10.593	8.507		11.5	10.437	8.875	11.88	10.644	8.826		11.562	10.25	8.312	11.879	10.597	8.548		11.687	11.875	11.75	11.977	11.969	11.917
11.562	8.5	0	0	0		8.5	8.25	8.437	8.25	0.25			11.562	11.885	-0.323		11.75	11.93	-0.18		11.312	10.625	8	11.882	10.593	8.505		11.5	10.437	8.875	11.879	10.643	8.824		11.562	10.25	8.312	11.879	10.597	8.546		11.687	11.875	11.75	11.977	11.968	11.917
11.562	8.5	0	0	0		8.5	8.25	8.437	8.312	0.25			11.562	11.885	-0.323		11.75	11.93	-0.18		11.312	10.625	8	11.882	10.592	8.502		11.5	10.437	8.875	11.879	10.643	8.822		11.562	10.25	8.312	11.878	10.596	8.543		11.687	11.875	11.75	11.976	11.968	11.917
11.562	8.5	0	0	0		8.5	8.187	8.375	8.312	0.313			11.562	11.884	-0.322		11.75	11.93	-0.18		11.312	10.625	8	11.881	10.592	8.499		11.5	10.437	8.875	11.879	10.643	8.82		11.562	10.25	8.312	11.878	10.596	8.541		11.687	11.875	11.75	11.976	11.968	11.917
11.571	8.437	0	0	0		8.437	8.187	8.375	8.25	0.25			11.571	11.884	-0.313		11.75	11.93	-0.18		11.375	10.625	8	11.881	10.591	8.496		11.562	10.437	8.875	11.878	10.642	8.818		11.562	10.25	8.25	11.877	10.595	8.538		11.687	11.875	11.75	11.975	11.968	11.917
11.562	8.437	0	0	0		8.437	8.25	8.375	8.25	0.187			11.562	11.883	-0.321		11.75	11.93	-0.18		11.312	10.625	8	11.88	10.591	8.494		11.5	10.437	8.875	11.878	10.642	8.816		11.562	10.25	8.25	11.877	10.595	8.535		11.687	11.875	11.75	11.975	11.968	11.918
11.562	8.5	0	0	0		8.5	8.25	8.375	8.25	0.25			11.562	11.883	-0.321		11.75	11.93	-0.18		11.375	10.625	8	11.88	10.591	8.491		11.5	10.437	8.875	11.877	10.642	8.814		11.562	10.25	8.25	11.877	10.594	8.533		11.687	11.875	11.75	11.975	11.968	11.918
11.5443	8.5	0	0	0		8.5	8.25	8.375	8.25	0.25			11.5443	11.882	-0.337714		11.75	11.93	-0.18		11.375	10.625	8	11.879	10.59	8.488		11.562	10.437	8.875	11.877	10.641	8.812		11.562	10.25	8.25	11.876	10.594	8.53		11.687	11.875	11.75	11.974	11.968	11.918
11.571	8.5	0	0	0		8.5	8.187	8.375	8.25	0.313			11.571	11.882	-0.311		11.75	11.93	-0.18		11.312	10.625	8	11.879	10.59	8.486		11.562	10.437	8.875	11.876	10.641	8.81		11.562	10.25	8.312	11.876	10.594	8.528		11.687	11.875	11.75	11.974	11.968	11.918
11.562	8.5	0	0	0		8.5	8.187	8.375	8.25	0.313			11.562	11.881	-0.319		11.75	11.93	-0.18		11.312	10.625	8	11.878	10.589	8.483		11.562	10.437	8.875	11.876	10.641	8.808		11.562	10.25	8.25	11.875	10.593	8.525		11.687	11.875	11.75	11.973	11.967	11.918
11.5531	8.437	0	0	0		8.437	8.187	8.375	8.25	0.25			11.5531	11.881	-0.327857		11.75	11.93	-0.18		11.375	10.625	7.937	11.878	10.589	8.48		11.562	10.437	8.812	11.875	10.64	8.806		11.562	10.25	8.25	11.875	10.593	8.523		11.687	11.875	11.75	11.973	11.967	11.918
11.562	8.437	0	0	0		8.437	8.25	8.375	8.25	0.187			11.562	11.88	-0.318		11.75	11.93	-0.18		11.375	10.625	7.937	11.878	10.588	8.477		11.562	10.437	8.812	11.875	10.64	8.804		11.562	10.25	8.25	11.874	10.592	8.52		11.687	11.875	11.75	11.972	11.967	11.918
11.562	8.437	0	0	0		8.437	8.25	8.375	8.25	0.187			11.562	11.88	-0.318		11.75	11.931	-0.181		11.312	10.625	7.937	11.877	10.588	8.475		11.562	10.437	8.875	11.874	10.64	8.802		11.562	10.25	8.25	11.874	10.592	8.518		11.687	11.875	11.75	11.972	11.967	11.918
11.562	8.437	0	0	0		8.437	8.25	8.375	8.25	0.187			11.562	11.879	-0.317		11.75	11.931	-0.181		11.375	10.625	8	11.877	10.587	8.472		11.562	10.437	8.812	11.874	10.64	8.8		11.562	10.25	8.25	11.873	10.591	8.515		11.687	11.875	11.75	11.972	11.967	11.918
11.562	8.437	0	0	0		8.437	8.187	8.375	8.25	0.25			11.562	11.879	-0.317		11.75	11.931	-0.181		11.375	10.625	7.937	11.876	10.587	8.469		11.562	10.437	8.812	11.874	10.639	8.798		11.562	10.25	8.25	11.873	10.591	8.512		11.687	11.875	11.75	11.971	11.967	11.918
11.571	8.437	0	0	0		8.437	8.25	8.375	8.25	0.187			11.571	11.878	-0.307		11.75	11.931	-0.181		11.375	10.625	7.937	11.876	10.586	8.467		11.562	10.437	8.812	11.873	10.639	8.796		11.562	10.25	8.25	11.873	10.591	8.51		11.687	11.875	11.75	11.971	11.967	11.919
11.562	8.437	0	0	0		8.437	8.25	8.375	8.25	0.187			11.562	11.878	-0.316		11.75	11.931	-0.181		11.312	10.625	7.937	11.875	10.586	8.464		11.562	10.437	8.812	11.873	10.639	8.794		11.562	10.187	8.25	11.872	10.59	8.507		11.687	11.875	11.75	11.97	11.967	11.919
11.571	8.437	0	0	0		8.437	8.25	8.437	8.25	0.187			11.571	11.877	-0.306		11.75	11.931	-0.181		11.375	10.625	7.937	11.875	10.586	8.461		11.562	10.437	8.812	11.872	10.638	8.792		11.562	10.187	8.25	11.872	10.59	8.505		11.687	11.875	11.75	11.97	11.966	11.919
11.571	8.437	0	0	0		8.437	8.25	8.375	8.25	0.187			11.571	11.877	-0.306		11.75	11.931	-0.181		11.375	10.625	7.937	11.874	10.585	8.458		11.562	10.437	8.812	11.872	10.638	8.79		11.562	10.25	8.25	11.871	10.589	8.502		11.687	11.875	11.75	11.97	11.966	11.919
11.571	8.5	0	0	0		8.5	8.25	8.437	8.25	0.25			11.571	11.876	-0.305		11.75	11.931	-0.181		11.312	10.625	7.937	11.874	10.585	8.456		11.562	10.437	8.812	11.871	10.638	8.788		11.562	10.25	8.25	11.871	10.589	8.5		11.687	11.937	11.75	11.969	11.966	11.919
11.562	8.437	0	0	0		8.437	8.25	8.375	8.25	0.187			11.562	11.876	-0.314		11.75	11.931	-0.181		11.375	10.625	7.937	11.874	10.584	8.455		11.562	10.437	8.812	11.871	10.637	8.787		11.562	10.25	8.25	11.87	10.588	8.498		11.687	11.875	11.75	11.969	11.966	11.919
11.562	8.437	0	0	0		8.437	8.25	8.375	8.25	0.187			11.562	11.875	-0.313		11.75	11.931	-0.181		11.375	10.625	7.937	11.873	10.583	8.453		11.562	10.437	8.812	11.87	10.637	8.785		11.562	10.25	8.25	11.87	10.588	8.496		11.687	11.875	11.75	11.968	11.966	11.919
11.562	8.437	0	0	0		8.437	8.25	8.437	8.25	0.187			11.562	11.875	-0.313		11.75	11.931	-0.181		11.375	10.625	7.937	11.873	10.583	8.451		11.5	10.437	8.812	11.87	10.636	8.783		11.562	10.25	8.25	11.869	10.587	8.495		11.687	11.875	11.75	11.968	11.966	11.919
11.562	8.437	0	0	0		8.437	8.25	8.437	8.25	0.187			11.562	11.874	-0.312		11.75	11.931	-0.181		11.375	10.625	7.937	11.872	10.582	8.449		11.562	10.437	8.812	11.87	10.636	8.781		11.562	10.25	8.25	11.869	10.587	8.493		11.687	11.875	11.75	11.967	11.966	11.919
11.562	8.5	0	0	0		8.5	8.25	8.437	8.25	0.25			11.562	11.874	-0.312		11.75	11.931	-0.181		11.375	10.625	7.937	11.872	10.582	8.448		11.562	10.437	8.812	11.869	10.636	8.779		11.562	10.25	8.25	11.868	10.586	8.491		11.687	11.937	11.75	11.967	11.966	11.919
11.562	8.5	0	0	0		8.5	8.25	8.437	8.25	0.25			11.562	11.873	-0.311		11.75	11.931	-0.181		11.375	10.625	7.937	11.871	10.581	8.446		11.562	10.437	8.812	11.869	10.635	8.777		11.625	10.25	8.25	11.868	10.586	8.489		11.687	11.875	11.75	11.967	11.965	11.919
11.571	8.437	0	0	0		8.437	8.25	8.437	8.25	0.187			11.571	11.873	-0.302		11.75	11.931	-0.181		11.375	10.625	7.937	11.871	10.581	8.444		11.562	10.437	8.812	11.868	10.635	8.775		11.562	10.25	8.25	11.868	10.585	8.487		11.687	11.875	11.75	11.966	11.965	11.919
11.562	8.437	0	0	0		8.437	8.25	8.437	8.25	0.187			11.562	11.872	-0.31		11.75	11.931	-0.181		11.375	10.625	7.937	11.87	10.58	8.442		11.562	10.437	8.812	11.868	10.634	8.773		11.562	10.187	8.25	11.867	10.585	8.485		11.687	11.937	11.75	11.966	11.965	11.92
11.571	8.437	0	0	0		8.437	8.312	8.437	8.25	0.187			11.571	11.872	-0.301		11.75	11.931	-0.181		11.375	10.625	7.937	11.87	10.58	8.44		11.562	10.437	8.812	11.867	10.634	8.771		11.562	10.25	8.25	11.867	10.584	8.483		11.687	11.875	11.75	11.965	11.965	11.92
11.562	8.437	0	0	0		8.437	8.25	8.437	8.25	0.187			11.562	11.871	-0.309		11.75	11.931	-0.181		11.375	10.625	7.937	11.869	10.579	8.439		11.562	10.437	8.812	11.867	10.634	8.769		11.562	10.25	8.25	11.866	10.584	8.481		11.687	11.937	11.75	11.965	11.965	11.92
11.571	8.437	0	0	0		8.437	8.312	8.437	8.25	0.187			11.571	11.871	-0.3		11.75	11.931	-0.181		11.312	10.625	7.937	11.869	10.579	8.437		11.562	10.437	8.812	11.866	10.633	8.767		11.625	10.187	8.25	11.866	10.583	8.479		11.687	11.875	11.75	11.965	11.965	11.92
11.571	8.437	0	0	0		8.437	8.312	8.437	8.25	0.187			11.571	11.87	-0.299		11.75	11.931	-0.181		11.375	10.625	7.937	11.869	10.578	8.435		11.562	10.437	8.812	11.866	10.633	8.766		11.562	10.25	8.25	11.865	10.583	8.478		11.687	11.937	11.75	11.964	11.965	11.92
11.571	8.437	0	0	0		8.437	8.312	8.437	8.25	0.187			11.571	11.87	-0.299		11.75	11.931	-0.181		11.375	10.625	7.937	11.868	10.578	8.433		11.562	10.437	8.812	11.865	10.632	8.764		11.625	10.187	8.25	11.865	10.582	8.476		11.687	11.875	11.75	11.964	11.964	11.92
11.571	8.5	0	0	0		8.5	8.25	8.437	8.25	0.25			11.571	11.869	-0.298		11.75	11.931	-0.181		11.375	10.562	7.937	11.868	10.577	8.431		11.562	10.437	8.812	11.865	10.632	8.762		11.562	10.187	8.25	11.864	10.581	8.474		11.687	11.875	11.75	11.963	11.964	11.92
11.571	8.437	0	0	0		8.437	8.25	8.437	8.25	0.187			11.571	11.869	-0.298		11.75	11.931	-0.181		11.375	10.625	7.937	11.867	10.576	8.43		11.562	10.437	8.812	11.864	10.632	8.76		11.625	10.187	8.25	11.864	10.581	8.472		11.687	11.937	11.75	11.963	11.964	11.92
11.571	8.437	0	0	0		8.437	8.25	8.437	8.25	0.187			11.571	11.868	-0.297		11.75	11.931	-0.181		11.375	10.562	7.937	11.867	10.576	8.428		11.562	10.437	8.812	11.864	10.631	8.758		11.562	10.187	8.312	11.863	10.58	8.47		11.687	11.875	11.75	11.962	11.964	11.92
11.571	8.437	0	0	0		8.437	8.25	8.437	8.25	0.187			11.571	11.868	-0.297		11.75	11.931	-0.181		11.375	10.625	7.937	11.866	10.575	8.426		11.562	10.437	8.812	11.864	10.631	8.756		11.562	10.187	8.25	11.863	10.58	8.468		11.687	11.937	11.75	11.962	11.964	11.92
11.571	8.437	0	0	0		8.437	8.25	8.437	8.25	0.187			11.571	11.867	-0.296		11.75	11.931	-0.181		11.375	10.562	7.937	11.866	10.575	8.424		11.562	10.437	8.812	11.863	10.63	8.754		11.562	10.187	8.312	11.863	10.579	8.466		11.687	11.875	11.75	11.962	11.964	11.92
11.562	8.437	0	0	0		8.437	8.25	8.437	8.25	0.187			11.562	11.867	-0.305		11.75	11.931	-0.181		11.375	10.562	7.937	11.865	10.574	8.423		11.562	10.437	8.812	11.863	10.63	8.752		11.562	10.187	8.312	11.862	10.579	8.464		11.687	11.937	11.75	11.961	11.964	11.92
11.571	8.437	0	0	0		8.437	8.25	8.375	8.25	0.187			11.571	11.866	-0.295		11.75	11.931	-0.181		11.375	10.562	7.937	11.865	10.574	8.421		11.562	10.437	8.812	11.862	10.63	8.75		11.562	10.25	8.25	11.862	10.578	8.462		11.687	11.937	11.75	11.961	11.963	11.92
11.571	8.437	0	0	0		8.437	8.25	8.375	8.25	0.187			11.571	11.866	-0.295		11.75	11.931	-0.181		11.312	10.562	7.937	11.864	10.573	8.419		11.562	10.437	8.812	11.862	10.629	8.748		11.625	10.187	8.25	11.861	10.578	8.46		11.687	11.875	11.75	11.96	11.963	11.921
11.571	8.375	0	0	0		8.375	8.25	8.375	8.25	0.125			11.571	11.865	-0.294		11.75	11.931	-0.181		11.375	10.625	7.937	11.864	10.573	8.417		11.562	10.437	8.812	11.861	10.629	8.746		11.562	10.187	8.25	11.861	10.577	8.459		11.687	11.937	11.75	11.96	11.963	11.921
11.571	8.437	0	0	0		8.437	8.25	8.375	8.25	0.187			11.571	11.865	-0.294		11.75	11.931	-0.181		11.312	10.562	7.937	11.864	10.572	8.415		11.562	10.437	8.75	11.861	10.628	8.745		11.625	10.187	8.25	11.86	10.577	8.457		11.687	11.937	11.75	11.959	11.963	11.921
11.571	8.437	0	0	0		8.437	8.25	8.375	8.25	0.187			11.571	11.864	-0.293		11.75	11.931	-0.181		11.375	10.562	7.937	11.863	10.572	8.414		11.562	10.437	8.812	11.86	10.628	8.743		11.562	10.187	8.25	11.86	10.576	8.455		11.687	11.937	11.75	11.959	11.963	11.921
11.571	8.437	0	0	0		8.437	8.25	8.375	8.25	0.187			11.571	11.864	-0.293		11.75	11.931	-0.181		11.312	10.625	7.937	11.863	10.571	8.412		11.562	10.437	8.812	11.86	10.628	8.741		11.625	10.187	8.312	11.859	10.576	8.453		11.687	11.875	11.75	11.959	11.963	11.921
11.571	8.437	0	0	0		8.437	8.25	8.375	8.25	0.187			11.571	11.863	-0.292		11.75	11.931	-0.181		11.375	10.562	7.937	11.862	10.571	8.41		11.562	10.437	8.812	11.859	10.627	8.739		11.625	10.187	8.25	11.859	10.575	8.451		11.687	11.875	11.75	11.958	11.963	11.921
11.571	8.375	0	0	0		8.375	8.187	8.375	8.25	0.188			11.571	11.863	-0.292		11.75	11.931	-0.181		11.312	10.562	7.937	11.862	10.57	8.408		11.562	10.437	8.812	11.859	10.627	8.737		11.625	10.187	8.25	11.859	10.575	8.449		11.687	11.875	11.75	11.958	11.962	11.921
11.571	8.375	0	0	0		8.375	8.187	8.375	8.25	0.188			11.571	11.862	-0.291		11.75	11.932	-0.182		11.375	10.562	7.937	11.861	10.569	8.407		11.562	10.437	8.75	11.859	10.626	8.735		11.625	10.187	8.25	11.858	10.574	8.447		11.687	11.875	11.75	11.957	11.962	11.921
11.571	8.375	0	0	0		8.375	8.187	8.375	8.25	0.188			11.571	11.862	-0.291		11.75	11.932	-0.182		11.375	10.562	7.937	11.861	10.569	8.405		11.562	10.437	8.75	11.858	10.626	8.733		11.625	10.187	8.25	11.858	10.574	8.445		11.687	11.875	11.75	11.957	11.962	11.921
11.571	8.375	0	0	0		8.375	8.187	8.312	8.25	0.188			11.571	11.862	-0.291		11.75	11.932	-0.182		11.375	10.562	7.937	11.86	10.568	8.403		11.562	10.437	8.75	11.858	10.626	8.731		11.562	10.187	8.25	11.857	10.573	8.443		11.687	11.937	11.75	11.957	11.962	11.921
11.571	8.312	0	0	0		8.312	8.125	8.312	8.187	0.187			11.571	11.861	-0.29		11.75	11.932	-0.182		11.375	10.562	7.937	11.86	10.568	8.401		11.562	10.437	8.75	11.857	10.625	8.729		11.562	10.187	8.25	11.857	10.573	8.442		11.687	11.937	11.75	11.956	11.962	11.921
11.571	8.312	0	0	0		8.312	8.125	8.312	8.187	0.187			11.571	11.861	-0.29		11.75	11.932	-0.182		11.375	10.562	7.937	11.86	10.567	8.399		11.562	10.437	8.75	11.857	10.625	8.727		11.562	10.187	8.25	11.856	10.572	8.44		11.687	11.937	11.75	11.956	11.962	11.921
11.571	8.312	0	0	0		8.312	8.125	8.312	8.187	0.187			11.571	11.86	-0.289		11.75	11.932	-0.182		11.375	10.562	7.937	11.859	10.567	8.398		11.562	10.437	8.75	11.856	10.625	8.725		11.625	10.187	8.25	11.856	10.572	8.438		11.687	11.875	11.75	11.955	11.962	11.921
11.571	8.312	0	0	0		8.312	8.125	8.25	8.187	0.187			11.571	11.86	-0.289		11.75	11.932	-0.182		11.375	10.562	7.937	11.859	10.566	8.396		11.562	10.437	8.75	11.856	10.624	8.724		11.625	10.187	8.25	11.855	10.571	8.436		11.687	11.875	11.75	11.955	11.962	11.922
11.571	8.312	0	0	0		8.312	8.125	8.25	8.187	0.187			11.571	11.859	-0.288		11.75	11.932	-0.182		11.375	10.562	7.937	11.858	10.566	8.394		11.562	10.437	8.75	11.855	10.624	8.722		11.625	10.187	8.25	11.855	10.571	8.434		11.687	11.875	11.75	11.954	11.961	11.922
11.571	8.312	0	0	0		8.312	8.062	8.25	8.187	0.25			11.571	11.859	-0.288		11.75	11.932	-0.182		11.375	10.562	7.937	11.858	10.565	8.392		11.562	10.437	8.75	11.855	10.623	8.72		11.562	10.187	8.187	11.854	10.57	8.432		11.687	11.937	11.75	11.954	11.961	11.922
11.571	8.312	0	0	0		8.312	8.125	8.25	8.187	0.187			11.571	11.858	-0.287		11.75	11.932	-0.182		11.375	10.562	7.937	11.857	10.565	8.39		11.562	10.437	8.75	11.854	10.623	8.718		11.562	10.187	8.187	11.854	10.57	8.43		11.687	11.875	11.75	11.954	11.961	11.922
11.571	8.312	0	0	0		8.312	8.125	8.25	8.187	0.187			11.571	11.858	-0.287		11.75	11.932	-0.182		11.375	10.562	7.937	11.857	10.564	8.389		11.562	10.437	8.75	11.854	10.623	8.716		11.625	10.187	8.187	11.854	10.569	8.428		11.687	11.937	11.75	11.953	11.961	11.922
11.571	8.312	0	0	0		8.312	8.062	8.25	8.187	0.25			11.571	11.857	-0.286		11.75	11.932	-0.182		11.375	10.562	7.875	11.856	10.564	8.387		11.562	10.437	8.75	11.854	10.622	8.714		11.625	10.187	8.187	11.853	10.569	8.426		11.687	11.875	11.75	11.953	11.961	11.922
11.571	8.312	0	0	0		8.312	8.062	8.25	8.187	0.25			11.571	11.857	-0.286		11.75	11.932	-0.182		11.375	10.562	7.875	11.856	10.563	8.385		11.562	10.437	8.75	11.853	10.622	8.712		11.625	10.187	8.187	11.853	10.568	8.424		11.687	11.875	11.75	11.952	11.961	11.922
11.571	8.312	0	0	0		8.312	8.062	8.25	8.187	0.25			11.571	11.856	-0.285		11.75	11.932	-0.182		11.375	10.562	7.937	11.855	10.562	8.383		11.562	10.437	8.75	11.853	10.621	8.71		11.625	10.187	8.187	11.852	10.567	8.423		11.687	11.937	11.75	11.952	11.961	11.922
11.571	8.25	0	0	0		8.25	8.062	8.25	8.125	0.188			11.571	11.856	-0.285		11.75	11.932	-0.182		11.375	10.562	7.937	11.855	10.562	8.382		11.562	10.437	8.75	11.852	10.621	8.708		11.625	10.187	8.187	11.852	10.567	8.421		11.687	11.937	11.75	11.952	11.96	11.922
11.571	8.312	0	0	0		8.312	8.062	8.187	8.125	0.25			11.571	11.855	-0.284		11.75	11.932	-0.182		11.375	10.562	7.937	11.855	10.561	8.38		11.562	10.437	8.75	11.852	10.621	8.706		11.625	10.187	8.187	11.851	10.566	8.419		11.687	11.875	11.75	11.951	11.96	11.922
11.571	8.312	0	0	0		8.312	8.062	8.25	8.125	0.25			11.571	11.855	-0.284		11.75	11.932	-0.182		11.375	10.562	7.875	11.854	10.561	8.378		11.562	10.437	8.75	11.851	10.62	8.704		11.562	10.187	8.187	11.851	10.566	8.417		11.687	11.937	11.75	11.951	11.96	11.922
11.571	8.25	0	0	0		8.25	8.062	8.25	8.125	0.188			11.571	11.854	-0.283		11.75	11.932	-0.182		11.375	10.562	7.875	11.854	10.56	8.376		11.562	10.437	8.75	11.851	10.62	8.702		11.625	10.187	8.187	11.85	10.565	8.415		11.687	11.937	11.75	11.95	11.96	11.922
11.571	8.25	0	0	0		8.25	8.062	8.187	8.125	0.188			11.571	11.854	-0.283		11.75	11.932	-0.182		11.375	10.562	7.875	11.853	10.56	8.374		11.562	10.437	8.75	11.85	10.619	8.701		11.625	10.187	8.125	11.85	10.565	8.413		11.687	11.875	11.75	11.95	11.96	11.922
11.562	8.25	0	0	0		8.25	8.062	8.187	8.125	0.188			11.562	11.853	-0.291		11.75	11.932	-0.182		11.375	10.562	7.875	11.853	10.559	8.373		11.562	10.437	8.75	11.85	10.619	8.699		11.625	10.187	8.125	11.849	10.564	8.411		11.687	11.937	11.75	11.949	11.96	11.923
11.571	8.25	0	0	0		8.25	8.062	8.25	8.125	0.188			11.571	11.853	-0.282		11.75	11.932	-0.182		11.312	10.562	7.875	11.852	10.559	8.371		11.562	10.437	8.75	11.849	10.619	8.697		11.625	10.187	8.125	11.849	10.564	8.409		11.687	11.937	11.75	11.949	11.96	11.923
11.571	8.25	0	0	0		8.25	8.062	8.25	8.125	0.188			11.571	11.852	-0.281		11.75	11.932	-0.182		11.375	10.562	7.875	11.852	10.558	8.369		11.562	10.437	8.75	11.849	10.618	8.695		11.625	10.187	8.125	11.849	10.563	8.407		11.687	11.875	11.75	11.949	11.959	11.923
11.58	8.25	0	0	0		8.25	8.062	8.187	8.125	0.188			11.58	11.852	-0.272		11.75	11.932	-0.182		11.375	10.562	7.875	11.851	10.558	8.367		11.562	10.437	8.75	11.849	10.618	8.693		11.625	10.187	8.125	11.848	10.563	8.406		11.687	11.937	11.75	11.948	11.959	11.923
11.571	8.25	0	0	0		8.25	8.062	8.25	8.125	0.188			11.571	11.851	-0.28		11.75	11.932	-0.182		11.375	10.562	7.875	11.851	10.557	8.366		11.562	10.437	8.75	11.848	10.617	8.691		11.625	10.187	8.125	11.848	10.562	8.404		11.687	11.875	11.75	11.948	11.959	11.923
11.571	8.25	0	0	0		8.25	8.062	8.25	8.125	0.188			11.571	11.851	-0.28		11.75	11.932	-0.182		11.375	10.562	7.875	11.85	10.557	8.364		11.562	10.437	8.75	11.848	10.617	8.689		11.625	10.187	8.125	11.847	10.562	8.402		11.687	11.937	11.75	11.947	11.959	11.923
11.571	8.25	0	0	0		8.25	8.062	8.25	8.187	0.188			11.571	11.85	-0.279		11.75	11.932	-0.182		11.375	10.562	7.875	11.85	10.556	8.362		11.562	10.437	8.75	11.847	10.617	8.687		11.625	10.187	8.125	11.847	10.561	8.4		11.687	11.875	11.75	11.947	11.959	11.923
11.571	8.312	0	0	0		8.312	8.062	8.25	8.187	0.25			11.571	11.85	-0.279		11.75	11.932	-0.182		11.375	10.562	7.875	11.85	10.555	8.36		11.562	10.437	8.75	11.847	10.616	8.685		11.625	10.187	8.125	11.846	10.561	8.398		11.687	11.937	11.75	11.946	11.959	11.923
11.571	8.312	0	0	0		8.312	8.062	8.25	8.187	0.25			11.571	11.849	-0.278		11.75	11.932	-0.182		11.312	10.562	7.875	11.849	10.555	8.358		11.562	10.437	8.75	11.846	10.616	8.683		11.625	10.187	8.125	11.846	10.56	8.396		11.687	11.937	11.75	11.946	11.959	11.923
11.571	8.312	0	0	0		8.312	8.062	8.25	8.187	0.25			11.571	11.849	-0.278		11.75	11.932	-0.182		11.375	10.562	7.875	11.849	10.554	8.357		11.562	10.437	8.75	11.846	10.615	8.681		11.625	10.187	8.125	11.845	10.56	8.394		11.687	11.937	11.75	11.946	11.958	11.923
11.571	8.312	0	0	0		8.312	8.125	8.25	8.125	0.187			11.571	11.848	-0.277		11.75	11.932	-0.182		11.375	10.562	7.875	11.848	10.554	8.355		11.562	10.437	8.75	11.845	10.615	8.68		11.625	10.187	8.125	11.845	10.559	8.392		11.687	11.937	11.75	11.945	11.958	11.923
11.571	8.312	0	0	0		8.312	8.125	8.25	8.125	0.187			11.571	11.848	-0.277		11.75	11.932	-0.182		11.375	10.562	7.875	11.848	10.553	8.353		11.562	10.437	8.75	11.845	10.615	8.678		11.625	10.187	8.125	11.844	10.559	8.39		11.687	11.937	11.75	11.945	11.958	11.923
11.571	8.312	0	0	0		8.312	8.062	8.25	8.125	0.25			11.571	11.847	-0.276		11.75	11.932	-0.182		11.375	10.562	7.875	11.847	10.553	8.351		11.562	10.437	8.75	11.845	10.614	8.676		11.625	10.187	8.125	11.844	10.558	8.388		11.687	11.937	11.75	11.944	11.958	11.923
11.58	8.312	0	0	0		8.312	8.062	8.25	8.125	0.25			11.58	11.847	-0.267		11.75	11.932	-0.182		11.375	10.562	7.875	11.847	10.552	8.349		11.562	10.437	8.75	11.844	10.614	8.674		11.625	10.187	8.125	11.844	10.558	8.387		11.687	11.937	11.75	11.944	11.958	11.923
11.571	8.312	0	0	0		8.312	8.062	8.25	8.125	0.25			11.571	11.846	-0.275		11.75	11.932	-0.182		11.375	10.562	7.875	11.846	10.552	8.348		11.562	10.437	8.75	11.844	10.613	8.672		11.625	10.187	8.125	11.843	10.557	8.385		11.687	11.937	11.75	11.944	11.958	11.924
11.571	8.312	0	0	0		8.312	8.062	8.25	8.125	0.25			11.571	11.846	-0.275		11.75	11.932	-0.182		11.375	10.562	7.875	11.846	10.551	8.346		11.562	10.437	8.75	11.843	10.613	8.67		11.625	10.187	8.125	11.843	10.557	8.383		11.687	11.937	11.75	11.943	11.958	11.924
11.571	8.312	0	0	0		8.312	8.062	8.25	8.125	0.25			11.571	11.845	-0.274		11.75	11.932	-0.182		11.375	10.562	7.875	11.845	10.551	8.344		11.562	10.437	8.75	11.843	10.613	8.668		11.625	10.187	8.125	11.842	10.556	8.381		11.687	11.937	11.75	11.943	11.958	11.924
11.571	8.312	0	0	0		8.312	8.125	8.25	8.125	0.187			11.571	11.845	-0.274		11.75	11.932	-0.182		11.375	10.562	7.875	11.845	10.55	8.342		11.562	10.437	8.75	11.842	10.612	8.666		11.625	10.187	8.125	11.842	10.556	8.379		11.687	11.937	11.75	11.942	11.957	11.924
11.571	8.312	0	0	0		8.312	8.125	8.25	8.125	0.187			11.571	11.844	-0.273		11.75	11.932	-0.182		11.375	10.562	7.875	11.845	10.55	8.34		11.562	10.437	8.75	11.842	10.612	8.664		11.625	10.187	8.125	11.841	10.555	8.377		11.687	11.937	11.75	11.942	11.957	11.924
11.571	8.312	0	0	0		8.312	8.125	8.25	8.125	0.187			11.571	11.844	-0.273		11.75	11.932	-0.182		11.375	10.562	7.875	11.844	10.549	8.337		11.562	10.437	8.687	11.841	10.611	8.662		11.625	10.187	8.125	11.841	10.554	8.374		11.687	11.937	11.75	11.941	11.957	11.924
11.571	8.312	0	0	0		8.312	8.062	8.25	8.187	0.25			11.571	11.843	-0.272		11.75	11.932	-0.182		11.375	10.562	7.875	11.844	10.548	8.334		11.562	10.437	8.687	11.841	10.611	8.66		11.562	10.187	8.125	11.84	10.554	8.371		11.687	11.937	11.75	11.941	11.957	11.924
11.571	8.312	0	0	0		8.312	8.062	8.25	8.187	0.25			11.571	11.843	-0.272		11.75	11.932	-0.182		11.375	10.562	7.875	11.843	10.548	8.331		11.562	10.437	8.687	11.84	10.61	8.658		11.625	10.187	8.125	11.84	10.553	8.369		11.687	11.937	11.75	11.941	11.957	11.924
11.571	8.312	0	0	0		8.312	8.062	8.25	8.187	0.25			11.571	11.842	-0.271		11.75	11.932	-0.182		11.375	10.562	7.875	11.843	10.547	8.328		11.562	10.437	8.687	11.84	10.61	8.655		11.625	10.187	8.125	11.839	10.553	8.366		11.687	11.937	11.75	11.94	11.957	11.924
11.571	8.312	0	0	0		8.312	8.062	8.25	8.187	0.25			11.571	11.842	-0.271		11.75	11.932	-0.182		11.375	10.562	7.875	11.842	10.546	8.325		11.562	10.437	8.687	11.839	10.609	8.653		11.625	10.187	8.125	11.839	10.552	8.363		11.687	11.937	11.75	11.94	11.956	11.924
11.571	8.312	0	0	0		8.312	8.062	8.25	8.187	0.25			11.571	11.841	-0.27		11.75	11.932	-0.182		11.375	10.562	7.875	11.842	10.546	8.322		11.562	10.437	8.687	11.839	10.609	8.651		11.625	10.187	8.125	11.838	10.551	8.36		11.687	11.937	11.75	11.939	11.956	11.924
11.571	8.312	0	0	0		8.312	8.062	8.25	8.125	0.25			11.571	11.841	-0.27		11.75	11.932	-0.182		11.375	10.562	7.875	11.841	10.545	8.319		11.562	10.437	8.687	11.838	10.609	8.649		11.625	10.187	8.125	11.838	10.551	8.357		11.687	11.937	11.75	11.939	11.956	11.924
11.571	8.312	0	0	0		8.312	8.062	8.25	8.125	0.25			11.571	11.84	-0.269		11.75	11.932	-0.182		11.375	10.562	7.875	11.841	10.545	8.317		11.562	10.437	8.687	11.838	10.608	8.647		11.625	10.187	8.125	11.838	10.55	8.355		11.687	11.937	11.75	11.938	11.956	11.924
11.571	8.312	0	0	0		8.312	8.062	8.25	8.125	0.25			11.571	11.84	-0.269		11.75	11.932	-0.182		11.375	10.562	7.875	11.84	10.544	8.314		11.562	10.437	8.687	11.838	10.608	8.644		11.625	10.187	8.125	11.837	10.55	8.352		11.687	11.937	11.75	11.938	11.956	11.924
11.571	8.312	0	0	0		8.312	8.062	8.25	8.125	0.25			11.571	11.839	-0.268		11.75	11.932	-0.182		11.375	10.562	7.812	11.84	10.543	8.311		11.562	10.437	8.687	11.837	10.607	8.642		11.562	10.187	8.125	11.837	10.549	8.349		11.687	11.937	11.75	11.938	11.956	11.924
11.571	8.312	0	0	0		8.312	8.062	8.25	8.125	0.25			11.571	11.839	-0.268		11.75	11.932	-0.182		11.375	10.562	7.812	11.839	10.543	8.308		11.562	10.437	8.687	11.837	10.607	8.64		11.625	10.187	8.125	11.836	10.548	8.346		11.687	11.937	11.75	11.937	11.956	11.924
11.571	8.312	0	0	0		8.312	8.062	8.25	8.125	0.25			11.571	11.838	-0.267		11.75	11.932	-0.182		11.375	10.562	7.812	11.839	10.542	8.305		11.562	10.437	8.687	11.836	10.606	8.638		11.625	10.187	8.125	11.836	10.548	8.343		11.687	11.937	11.75	11.937	11.955	11.924
11.571	8.312	0	0	0		8.312	8.062	8.25	8.125	0.25			11.571	11.838	-0.267		11.75	11.932	-0.182		11.375	10.562	7.812	11.839	10.541	8.302		11.562	10.437	8.687	11.836	10.606	8.636		11.625	10.187	8.125	11.835	10.547	8.341		11.687	11.937	11.75	11.936	11.955	11.924
11.571	8.312	0	0	0		8.312	8.062	8.25	8.125	0.25			11.571	11.837	-0.266		11.75	11.932	-0.182		11.375	10.562	7.812	11.838	10.541	8.299		11.562	10.437	8.687	11.835	10.605	8.633		11.625	10.187	8.125	11.835	10.547	8.338		11.687	11.937	11.75	11.936	11.955	11.925
11.571	8.312	0	0	0		8.312	8.062	8.25	8.125	0.25			11.571	11.837	-0.266		11.75	11.932	-0.182		11.375	10.562	7.812	11.838	10.54	8.296		11.562	10.437	8.687	11.835	10.605	8.631		11.625	10.187	8.125	11.834	10.546	8.335		11.687	11.937	11.75	11.935	11.955	11.925
11.571	8.312	0	0	0		8.312	8.125	8.25	8.125	0.187			11.571	11.836	-0.265		11.75	11.932	-0.182		11.375	10.562	7.812	11.837	10.54	8.293		11.562	10.437	8.687	11.834	10.604	8.629		11.625	10.187	8.125	11.834	10.545	8.332		11.687	11.937	11.75	11.935	11.955	11.925
11.571	8.312	0	0	0		8.312	8.125	8.25	8.125	0.187			11.571	11.836	-0.265		11.75	11.932	-0.182		11.375	10.562	7.812	11.837	10.539	8.29		11.562	10.437	8.687	11.834	10.604	8.627		11.625	10.187	8.125	11.833	10.545	8.33		11.687	11.937	11.75	11.935	11.955	11.925
11.571	8.312	0	0	0		8.312	8.125	8.25	8.125	0.187			11.571	11.835	-0.264		11.75	11.932	-0.182		11.375	10.562	7.812	11.836	10.538	8.287		11.562	10.437	8.687	11.833	10.603	8.625		11.625	10.187	8.125	11.833	10.544	8.327		11.687	11.937	11.75	11.934	11.954	11.925
11.571	8.312	0	0	0		8.312	8.125	8.312	8.125	0.187			11.571	11.835	-0.264		11.75	11.932	-0.182		11.375	10.562	7.812	11.836	10.538	8.284		11.562	10.437	8.687	11.833	10.603	8.622		11.625	10.187	8.125	11.832	10.544	8.324		11.687	11.937	11.75	11.934	11.954	11.925
11.571	8.312	0	0	0		8.312	8.125	8.312	8.125	0.187			11.571	11.834	-0.263		11.75	11.932	-0.182		11.375	10.562	7.812	11.835	10.537	8.281		11.562	10.437	8.687	11.832	10.602	8.62		11.625	10.187	8.125	11.832	10.543	8.321		11.687	11.937	11.75	11.933	11.954	11.925
11.571	8.312	0	0	0		8.312	8.125	8.25	8.125	0.187			11.571	11.833	-0.262		11.75	11.932	-0.182		11.375	10.562	7.812	11.835	10.536	8.278		11.562	10.437	8.687	11.832	10.602	8.618		11.625	10.187	8.125	11.831	10.542	8.318		11.687	11.937	11.75	11.933	11.954	11.925
11.571	8.312	0	0	0		8.312	8.125	8.312	8.125	0.187			11.571	11.833	-0.262		11.75	11.932	-0.182		11.375	10.5	7.812	11.834	10.536	8.275		11.562	10.437	8.687	11.832	10.601	8.616		11.625	10.187	8.125	11.831	10.542	8.316		11.687	11.937	11.75	11.932	11.954	11.925
11.571	8.312	0	0	0		8.312	8.125	8.312	8.125	0.187			11.571	11.832	-0.261		11.75	11.932	-0.182		11.375	10.562	7.812	11.834	10.535	8.272		11.562	10.437	8.687	11.831	10.601	8.613		11.625	10.187	8.187	11.831	10.541	8.313		11.687	11.937	11.75	11.932	11.954	11.925
11.571	8.312	0	0	0		8.312	8.062	8.312	8.125	0.25			11.571	11.832	-0.261		11.75	11.932	-0.182		11.375	10.5	7.812	11.833	10.535	8.269		11.562	10.437	8.687	11.831	10.6	8.611		11.625	10.187	8.187	11.83	10.54	8.31		11.687	11.937	11.75	11.932	11.954	11.925
11.571	8.25	0	0	0		8.25	8.062	8.312	8.125	0.25			11.571	11.831	-0.26		11.75	11.932	-0.182		11.375	10.562	7.812	11.833	10.534	8.266		11.562	10.437	8.687	11.83	10.6	8.609		11.625	10.187	8.125	11.83	10.54	8.307		11.687	11.937	11.75	11.931	11.953	11.925
11.571	8.312	0	0	0		8.312	8.125	8.312	8.125	0.187			11.571	11.831	-0.26		11.75	11.932	-0.182		11.375	10.5	7.812	11.833	10.533	8.263		11.562	10.437	8.687	11.83	10.6	8.607		11.625	10.187	8.187	11.829	10.539	8.305		11.687	11.937	11.75	11.931	11.953	11.925
11.571	8.312	0	0	0		8.312	8.062	8.312	8.125	0.25			11.571	11.83	-0.259		11.75	11.932	-0.182		11.375	10.5	7.812	11.832	10.533	8.26		11.562	10.437	8.687	11.829	10.599	8.605		11.625	10.187	8.187	11.829	10.539	8.302		11.687	11.875	11.75	11.93	11.953	11.925
11.571	8.312	0	0	0		8.312	8.062	8.25	8.125	0.25			11.571	11.83	-0.259		11.75	11.932	-0.182		11.375	10.5	7.812	11.832	10.532	8.257		11.562	10.437	8.687	11.829	10.599	8.602		11.625	10.125	8.187	11.828	10.538	8.299		11.687	11.875	11.75	11.93	11.953	11.925
11.571	8.312	0	0	0		8.312	8.062	8.25	8.125	0.25			11.571	11.829	-0.258		11.75	11.932	-0.182		11.375	10.5	7.812	11.831	10.531	8.254		11.562	10.437	8.687	11.828	10.598	8.6		11.625	10.187	8.125	11.828	10.537	8.296		11.687	11.937	11.75	11.929	11.953	11.925
11.571	8.312	0	0	0		8.312	8	8.25	8.125	0.312			11.571	11.829	-0.258		11.75	11.932	-0.182		11.375	10.5	7.812	11.831	10.531	8.251		11.562	10.437	8.625	11.828	10.598	8.598		11.625	10.187	8.187	11.827	10.537	8.293		11.687	11.937	11.75	11.929	11.953	11.925
11.571	8.25	0	0	0		8.25	8.062	8.25	8.062	0.188			11.571	11.828	-0.257		11.75	11.932	-0.182		11.375	10.5	7.812	11.83	10.53	8.248		11.562	10.437	8.687	11.827	10.597	8.596		11.625	10.187	8.187	11.827	10.536	8.291		11.687	11.937	11.75	11.929	11.953	11.925
11.571	8.25	0	0	0		8.25	8.062	8.25	8.062	0.188			11.571	11.828	-0.257		11.75	11.932	-0.182		11.375	10.5	7.812	11.83	10.53	8.246		11.562	10.437	8.625	11.827	10.597	8.594		11.625	10.187	8.125	11.826	10.536	8.288		11.687	11.937	11.75	11.928	11.952	11.925
11.571	8.312	0	0	0		8.312	8.062	8.25	8.062	0.25			11.571	11.827	-0.256		11.75	11.932	-0.182		11.375	10.5	7.812	11.829	10.529	8.243		11.562	10.437	8.687	11.826	10.596	8.591		11.625	10.187	8.125	11.826	10.535	8.285		11.687	11.937	11.75	11.928	11.952	11.925
11.571	8.25	0	0	0		8.25	8.062	8.25	8.062	0.188			11.571	11.827	-0.256		11.75	11.932	-0.182		11.375	10.5	7.812	11.829	10.528	8.24		11.562	10.437	8.687	11.826	10.596	8.589		11.625	10.187	8.125	11.825	10.534	8.282		11.687	11.937	11.75	11.927	11.952	11.925
11.571	8.312	0	0	0		8.312	8.062	8.25	8.062	0.25			11.571	11.826	-0.255		11.75	11.932	-0.182		11.375	10.5	7.812	11.828	10.528	8.237		11.562	10.437	8.687	11.825	10.595	8.587		11.625	10.187	8.125	11.825	10.534	8.28		11.687	11.937	11.75	11.927	11.952	11.926
11.571	8.312	0	0	0		8.312	8.062	8.25	8.062	0.25			11.571	11.826	-0.255		11.75	11.932	-0.182		11.375	10.5	7.812	11.828	10.527	8.234		11.562	10.437	8.625	11.825	10.595	8.585		11.625	10.125	8.125	11.825	10.533	8.277		11.687	11.937	11.75	11.926	11.952	11.926
11.571	8.312	0	0	0		8.312	8.062	8.25	8.062	0.25			11.571	11.825	-0.254		11.75	11.932	-0.182		11.375	10.5	7.75	11.827	10.526	8.231		11.562	10.437	8.625	11.825	10.594	8.583		11.625	10.125	8.125	11.824	10.533	8.274		11.687	11.937	11.75	11.926	11.952	11.926
11.571	8.25	0	0	0		8.25	8.062	8.25	8.062	0.188			11.571	11.825	-0.254		11.75	11.932	-0.182		11.375	10.5	7.75	11.827	10.526	8.228		11.562	10.437	8.625	11.824	10.594	8.58		11.625	10.125	8.125	11.824	10.532	8.271		11.687	11.937	11.75	11.926	11.951	11.926
11.571	8.187	0	0	0		8.187	8	8.187	8.062	0.187			11.571	11.824	-0.253		11.75	11.932	-0.182		11.375	10.5	7.75	11.827	10.525	8.225		11.562	10.437	8.687	11.824	10.593	8.578		11.625	10.125	8.125	11.823	10.531	8.268		11.687	11.937	11.75	11.925	11.951	11.926
11.571	8.25	0	0	0		8.25	8	8.187	8.062	0.25			11.571	11.824	-0.253		11.75	11.932	-0.182		11.375	10.5	7.75	11.826	10.524	8.222		11.562	10.437	8.625	11.823	10.593	8.576		11.625	10.125	8.125	11.823	10.531	8.266		11.687	11.937	11.75	11.925	11.951	11.926
11.571	8.25	0	0	0		8.25	8	8.187	8.062	0.25			11.571	11.823	-0.252		11.75	11.932	-0.182		11.375	10.5	7.75	11.826	10.524	8.219		11.562	10.437	8.625	11.823	10.592	8.574		11.625	10.125	8.125	11.822	10.53	8.263		11.687	11.937	11.75	11.924	11.951	11.926
11.571	8.25	0	0	0		8.25	8.062	8.187	8.062	0.188			11.571	11.823	-0.252		11.75	11.932	-0.182		11.375	10.5	7.75	11.825	10.523	8.216		11.562	10.437	8.625	11.822	10.592	8.572		11.625	10.125	8.125	11.822	10.53	8.26		11.687	11.937	11.75	11.924	11.951	11.926
11.571	8.25	0	0	0		8.25	8	8.187	8.062	0.25			11.571	11.822	-0.251		11.75	11.931	-0.181		11.375	10.5	7.75	11.825	10.523	8.213		11.562	10.437	8.625	11.822	10.591	8.569		11.625	10.125	8.125	11.821	10.529	8.257		11.687	11.937	11.75	11.923	11.951	11.926
11.571	8.187	0	0	0		8.187	8	8.187	8	0.187			11.571	11.822	-0.251		11.75	11.931	-0.181		11.375	10.5	7.75	11.824	10.522	8.21		11.562	10.437	8.625	11.821	10.591	8.567		11.625	10.125	8.125	11.821	10.528	8.255		11.687	11.937	11.75	11.923	11.951	11.926
11.571	8.187	0	0	0		8.187	8	8.187	8	0.187			11.571	11.821	-0.25		11.75	11.931	-0.181		11.375	10.5	7.75	11.824	10.521	8.207		11.562	10.437	8.625	11.821	10.591	8.565		11.625	10.125	8.125	11.82	10.528	8.252		11.687	11.937	11.75	11.923	11.95	11.926
11.571	8.187	0	0	0		8.187	8	8.187	8	0.187			11.571	11.821	-0.25		11.75	11.931	-0.181		11.375	10.5	7.75	11.823	10.521	8.204		11.562	10.437	8.625	11.82	10.59	8.563		11.625	10.125	8.125	11.82	10.527	8.249		11.687	11.937	11.75	11.922	11.95	11.926
11.571	8.187	0	0	0		8.187	8	8.187	8	0.187			11.571	11.82	-0.249		11.75	11.931	-0.181		11.375	10.5	7.75	11.823	10.52	8.201		11.562	10.437	8.625	11.82	10.59	8.561		11.625	10.125	8.125	11.819	10.527	8.246		11.687	11.937	11.75	11.922	11.95	11.926
11.571	8.187	0	0	0		8.187	8	8.187	8	0.187			11.571	11.819	-0.248		11.75	11.931	-0.181		11.375	10.5	7.75	11.822	10.519	8.198		11.562	10.437	8.625	11.819	10.589	8.558		11.625	10.125	8.125	11.819	10.526	8.243		11.687	11.937	11.75	11.921	11.95	11.926
11.571	8.187	0	0	0		8.187	8	8.187	8.062	0.187			11.571	11.819	-0.248		11.75	11.931	-0.181		11.375	10.5	7.75	11.822	10.519	8.195		11.562	10.437	8.625	11.819	10.589	8.556		11.625	10.125	8.125	11.818	10.525	8.241		11.687	11.937	11.75	11.921	11.95	11.926
11.571	8.187	0	0	0		8.187	8	8.187	8.062	0.187			11.571	11.818	-0.247		11.75	11.931	-0.181		11.375	10.5	7.75	11.821	10.518	8.192		11.562	10.437	8.625	11.818	10.588	8.554		11.625	10.125	8.125	11.818	10.525	8.238		11.687	11.937	11.75	11.92	11.95	11.926
11.571	8.187	0	0	0		8.187	8.062	8.187	8.062	0.125			11.571	11.818	-0.247		11.75	11.931	-0.181		11.375	10.5	7.75	11.821	10.518	8.189		11.562	10.437	8.625	11.818	10.588	8.552		11.625	10.125	8.125	11.818	10.524	8.235		11.687	11.937	11.75	11.92	11.949	11.926
11.571	8.25	0	0	0		8.25	8.062	8.187	8.062	0.188			11.571	11.817	-0.246		11.75	11.931	-0.181		11.375	10.5	7.75	11.82	10.517	8.186		11.562	10.437	8.625	11.818	10.587	8.55		11.625	10.125	8.125	11.817	10.524	8.232		11.687	11.937	11.75	11.92	11.949	11.926
11.571	8.187	0	0	0		8.187	8.062	8.187	8.062	0.125			11.571	11.817	-0.246		11.75	11.931	-0.181		11.375	10.5	7.75	11.82	10.516	8.183		11.562	10.437	8.625	11.817	10.587	8.547		11.625	10.125	8.125	11.817	10.523	8.23		11.687	11.937	11.75	11.919	11.949	11.926
11.571	8.25	0	0	0		8.25	8.062	8.187	8.062	0.188			11.571	11.816	-0.245		11.75	11.931	-0.181		11.375	10.5	7.75	11.82	10.516	8.18		11.562	10.437	8.625	11.817	10.586	8.545		11.625	10.125	8.125	11.816	10.522	8.227		11.687	11.937	11.75	11.919	11.949	11.926
11.571	8.25	0	0	0		8.25	8.062	8.187	8.062	0.188			11.571	11.816	-0.245		11.75	11.931	-0.181		11.375	10.5	7.75	11.819	10.515	8.177		11.562	10.437	8.625	11.816	10.586	8.543		11.625	10.125	8.062	11.816	10.522	8.224		11.687	11.937	11.75	11.918	11.949	11.926
11.571	8.25	0	0	0		8.25	8.062	8.25	8.062	0.188			11.571	11.815	-0.244		11.75	11.931	-0.181		11.375	10.5	7.75	11.819	10.514	8.174		11.562	10.437	8.625	11.816	10.585	8.541		11.625	10.125	8.125	11.815	10.521	8.221		11.687	11.937	11.75	11.918	11.949	11.926
11.571	8.25	0	0	0		8.25	8	8.25	8.062	0.25			11.571	11.815	-0.244		11.75	11.931	-0.181		11.375	10.5	7.75	11.818	10.514	8.172		11.562	10.437	8.625	11.815	10.585	8.539		11.625	10.125	8.062	11.815	10.521	8.218		11.687	11.937	11.75	11.917	11.949	11.927
11.571	8.25	0	0	0		8.25	8	8.25	8.062	0.25			11.571	11.814	-0.243		11.75	11.931	-0.181		11.375	10.5	7.75	11.818	10.513	8.169		11.562	10.437	8.625	11.815	10.584	8.536		11.625	10.125	8.062	11.814	10.52	8.216		11.687	11.937	11.75	11.917	11.948	11.927
11.571	8.25	0	0	0		8.25	8	8.187	8.062	0.25			11.571	11.814	-0.243		11.75	11.931	-0.181		11.375	10.5	7.75	11.817	10.513	8.166		11.562	10.437	8.625	11.814	10.584	8.534		11.625	10.125	8.125	11.814	10.519	8.213		11.687	11.937	11.75	11.916	11.948	11.927
11.571	8.187	0	0	0		8.187	8	8.187	8	0.187			11.571	11.813	-0.242		11.75	11.931	-0.181		11.375	10.5	7.75	11.817	10.512	8.163		11.562	10.437	8.625	11.814	10.583	8.532		11.625	10.125	8.062	11.813	10.519	8.21		11.687	11.937	11.75	11.916	11.948	11.927
11.571	8.187	0	0	0		8.187	8	8.187	8	0.187			11.571	11.813	-0.242		11.687	11.931	-0.244		11.375	10.5	7.75	11.816	10.511	8.16		11.562	10.437	8.625	11.813	10.583	8.53		11.625	10.125	8.062	11.813	10.518	8.207		11.687	11.937	11.75	11.916	11.948	11.927
11.58	8.125	0	0	0		8.125	7.937	8.125	8	0.188			11.58	11.812	-0.232		11.75	11.931	-0.181		11.375	10.5	7.75	11.816	10.511	8.157		11.562	10.437	8.625	11.813	10.582	8.528		11.625	10.125	8.062	11.812	10.517	8.204		11.687	11.937	11.75	11.915	11.948	11.927
11.571	8.125	0	0	0		8.125	7.937	8.125	8	0.188			11.571	11.812	-0.241		11.75	11.931	-0.181		11.375	10.5	7.75	11.815	10.51	8.154		11.562	10.437	8.625	11.812	10.582	8.525		11.625	10.125	8.062	11.812	10.517	8.202		11.687	11.937	11.75	11.915	11.948	11.927
11.571	8.125	0	0	0		8.125	7.937	8.125	8	0.188			11.571	11.811	-0.24		11.75	11.931	-0.181		11.375	10.5	7.75	11.815	10.509	8.151		11.562	10.437	8.625	11.812	10.581	8.523		11.625	10.125	8.062	11.811	10.516	8.199		11.687	11.937	11.75	11.914	11.947	11.927
11.571	8.125	0	0	0		8.125	7.937	8.125	8.062	0.188			11.571	11.811	-0.24		11.75	11.931	-0.181		11.375	10.5	7.75	11.814	10.509	8.148		11.562	10.437	8.625	11.812	10.581	8.521		11.625	10.125	8.062	11.811	10.516	8.196		11.687	11.937	11.75	11.914	11.947	11.927
11.571	8.125	0	0	0		8.125	7.937	8.125	8	0.188			11.571	11.81	-0.239		11.75	11.931	-0.181		11.375	10.5	7.75	11.814	10.508	8.145		11.562	10.437	8.625	11.811	10.58	8.519		11.625	10.125	8.062	11.811	10.515	8.193		11.687	11.937	11.75	11.914	11.947	11.927
11.571	8.062	0	0	0		8.062	7.937	8.062	8	0.125			11.571	11.81	-0.239		11.75	11.931	-0.181		11.375	10.5	7.75	11.814	10.507	8.142		11.562	10.437	8.625	11.811	10.58	8.516		11.625	10.125	8.062	11.81	10.514	8.19		11.687	11.937	11.75	11.913	11.947	11.927
11.571	8.062	0	0	0		8.062	7.937	8.062	8	0.125			11.571	11.809	-0.238		11.75	11.931	-0.181		11.375	10.5	7.75	11.813	10.507	8.139		11.562	10.375	8.625	11.81	10.579	8.514		11.625	10.125	8.062	11.81	10.514	8.187		11.687	11.937	11.75	11.913	11.947	11.927
11.571	8.062	0	0	0		8.062	7.937	8.062	8	0.125			11.571	11.809	-0.238		11.75	11.931	-0.181		11.375	10.5	7.75	11.813	10.506	8.136		11.562	10.437	8.625	11.81	10.579	8.511		11.625	10.125	8	11.809	10.513	8.184		11.687	11.937	11.75	11.912	11.947	11.927
11.571	8.062	0	0	0		8.062	7.875	8.062	8	0.187			11.571	11.808	-0.237		11.75	11.931	-0.181		11.375	10.5	7.75	11.812	10.505	8.133		11.562	10.375	8.625	11.809	10.578	8.509		11.625	10.125	8	11.809	10.512	8.181		11.687	11.937	11.75	11.912	11.946	11.927
11.571	8.062	0	0	0		8.062	7.875	8.062	8	0.187			11.571	11.807	-0.236		11.75	11.931	-0.181		11.375	10.5	7.75	11.812	10.505	8.13		11.562	10.437	8.625	11.809	10.578	8.506		11.625	10.125	8	11.808	10.512	8.178		11.687	11.937	11.75	11.911	11.946	11.927
11.571	8	0	0	0		8	7.812	8	8	0.188			11.571	11.807	-0.236		11.75	11.931	-0.181		11.375	10.5	7.75	11.811	10.504	8.127		11.562	10.375	8.625	11.808	10.577	8.504		11.625	10.125	8	11.808	10.511	8.176		11.687	11.937	11.75	11.911	11.946	11.927
11.571	8	0	0	0		8	7.812	8	8	0.188			11.571	11.806	-0.235		11.75	11.931	-0.181		11.375	10.5	7.75	11.811	10.503	8.124		11.562	10.437	8.625	11.808	10.577	8.501		11.625	10.125	8	11.807	10.51	8.173		11.687	11.937	11.75	11.91	11.946	11.927
11.571	7.937	0	0	0		7.937	7.812	8	8	0.188			11.571	11.806	-0.235		11.75	11.93	-0.18		11.375	10.5	7.75	11.81	10.502	8.121		11.562	10.437	8.625	11.807	10.576	8.499		11.625	10.125	8	11.807	10.509	8.17		11.687	11.937	11.75	11.91	11.946	11.927
11.571	8	0	0	0		8	7.812	7.937	8	0.188			11.571	11.805	-0.234		11.75	11.93	-0.18		11.375	10.5	7.75	11.81	10.502	8.118		11.562	10.437	8.625	11.807	10.575	8.496		11.625	10.125	8	11.806	10.509	8.167		11.687	11.937	11.75	11.91	11.946	11.927
11.571	7.937	0	0	0		7.937	7.812	7.937	8	0.188			11.571	11.805	-0.234		11.75	11.93	-0.18		11.375	10.5	7.75	11.809	10.501	8.115		11.562	10.437	8.625	11.806	10.575	8.494		11.625	10.125	7.937	11.806	10.508	8.164		11.687	11.937	11.75	11.909	11.945	11.927
11.571	8	0	0	0		8	7.812	7.937	7.937	0.188			11.571	11.804	-0.233		11.75	11.93	-0.18		11.375	10.5	7.75	11.809	10.5	8.112		11.562	10.375	8.625	11.806	10.574	8.492		11.625	10.125	7.937	11.805	10.507	8.161		11.687	11.937	11.75	11.909	11.945	11.927
11.571	8	0	0	0		8	7.812	7.937	7.937	0.188			11.571	11.804	-0.233		11.75	11.93	-0.18		11.375	10.5	7.75	11.808	10.5	8.109		11.562	10.437	8.625	11.805	10.574	8.489		11.625	10.125	7.937	11.805	10.507	8.158		11.687	11.937	11.75	11.908	11.945	11.927
11.571	8	0	0	0		8	7.812	7.937	7.937	0.188			11.571	11.803	-0.232		11.75	11.93	-0.18		11.375	10.5	7.75	11.808	10.499	8.106		11.562	10.437	8.625	11.805	10.573	8.487		11.625	10.125	7.937	11.804	10.506	8.155		11.687	11.937	11.75	11.908	11.945	11.927
11.571	8	0	0	0		8	7.812	7.937	7.937	0.188			11.571	11.803	-0.232		11.687	11.93	-0.243		11.375	10.5	7.75	11.807	10.498	8.103		11.562	10.437	8.625	11.804	10.573	8.484		11.625	10.125	7.937	11.804	10.505	8.152		11.687	11.937	11.75	11.907	11.945	11.927
11.571	8	0	0	0		8	7.812	7.937	7.937	0.188			11.571	11.802	-0.231		11.75	11.93	-0.18		11.375	10.5	7.75	11.807	10.497	8.1		11.562	10.375	8.625	11.804	10.572	8.482		11.625	10.125	7.937	11.803	10.505	8.149		11.687	11.937	11.75	11.907	11.945	11.927
11.571	8	0	0	0		8	7.812	7.937	7.937	0.188			11.571	11.802	-0.231		11.75	11.93	-0.18		11.375	10.5	7.75	11.806	10.497	8.097		11.562	10.437	8.625	11.803	10.572	8.479		11.625	10.125	7.937	11.803	10.504	8.146		11.687	11.937	11.75	11.906	11.944	11.927
11.571	8	0	0	0		8	7.812	7.937	7.937	0.188			11.571	11.801	-0.23		11.75	11.93	-0.18		11.375	10.5	7.75	11.806	10.496	8.094		11.562	10.437	8.562	11.803	10.571	8.477		11.625	10.125	7.937	11.802	10.503	8.143		11.687	11.937	11.75	11.906	11.944	11.927
11.571	8	0	0	0		8	7.812	7.937	7.937	0.188			11.571	11.801	-0.23		11.687	11.93	-0.243		11.375	10.5	7.687	11.805	10.495	8.091		11.562	10.437	8.562	11.802	10.57	8.474		11.625	10.125	7.937	11.802	10.502	8.14		11.687	11.937	11.75	11.906	11.944	11.927
11.571	8	0	0	0		8	7.812	7.937	7.937	0.188			11.571	11.8	-0.229		11.75	11.93	-0.18		11.375	10.5	7.687	11.805	10.495	8.088		11.562	10.437	8.562	11.802	10.57	8.472		11.625	10.125	7.875	11.801	10.502	8.137		11.687	11.937	11.75	11.905	11.944	11.927
11.571	8	0	0	0		8	7.75	7.937	7.937	0.25			11.571	11.799	-0.228		11.75	11.93	-0.18		11.375	10.5	7.687	11.804	10.494	8.085		11.562	10.437	8.562	11.801	10.569	8.469		11.625	10.125	7.875	11.801	10.501	8.134		11.687	11.937	11.75	11.905	11.944	11.927
11.571	8	0	0	0		8	7.812	7.937	7.937	0.188			11.571	11.799	-0.228		11.75	11.93	-0.18		11.375	10.5	7.687	11.804	10.493	8.082		11.562	10.375	8.562	11.801	10.569	8.467		11.625	10.125	7.875	11.8	10.5	8.131		11.687	11.937	11.75	11.904	11.944	11.927
11.571	8	0	0	0		8	7.812	7.937	7.937	0.188			11.571	11.798	-0.227		11.75	11.93	-0.18		11.375	10.5	7.687	11.803	10.492	8.079		11.562	10.375	8.562	11.801	10.568	8.464		11.625	10.125	7.875	11.8	10.5	8.128		11.687	11.937	11.75	11.904	11.943	11.927
11.571	8	0	0	0		8	7.812	7.937	7.937	0.188			11.571	11.798	-0.227		11.75	11.929	-0.179		11.375	10.5	7.687	11.803	10.492	8.076		11.562	10.375	8.562	11.8	10.568	8.462		11.625	10.125	7.875	11.799	10.499	8.125		11.687	11.937	11.75	11.903	11.943	11.927
11.571	8	0	0	0		8	7.75	7.937	7.875	0.25			11.571	11.797	-0.226		11.75	11.929	-0.179		11.375	10.5	7.687	11.803	10.491	8.073		11.562	10.375	8.562	11.8	10.567	8.46		11.625	10.125	7.875	11.799	10.498	8.122		11.687	11.937	11.75	11.903	11.943	11.927
11.571	8	0	0	0		8	7.75	7.875	7.875	0.25			11.571	11.797	-0.226		11.687	11.929	-0.242		11.375	10.5	7.687	11.802	10.49	8.07		11.562	10.437	8.562	11.799	10.567	8.457		11.625	10.125	7.875	11.799	10.498	8.12		11.687	11.937	11.75	11.902	11.943	11.927
11.571	8	0	0	0		8	7.75	7.875	7.875	0.25			11.571	11.796	-0.225		11.687	11.929	-0.242		11.375	10.5	7.687	11.802	10.49	8.067		11.562	10.375	8.562	11.799	10.566	8.455		11.625	10.125	7.875	11.798	10.497	8.117		11.687	11.937	11.75	11.902	11.943	11.927
11.571	8	0	0	0		8	7.75	7.875	7.875	0.25			11.571	11.796	-0.225		11.687	11.929	-0.242		11.375	10.437	7.687	11.801	10.489	8.064		11.562	10.437	8.562	11.798	10.565	8.452		11.625	10.125	7.875	11.798	10.496	8.114		11.687	11.937	11.75	11.902	11.943	11.927
11.571	8	0	0	0		8	7.75	7.937	7.875	0.25			11.571	11.795	-0.224		11.75	11.929	-0.179		11.375	10.5	7.687	11.801	10.488	8.061		11.562	10.375	8.562	11.798	10.565	8.45		11.625	10.125	7.875	11.797	10.496	8.111		11.687	11.937	11.75	11.901	11.942	11.927
11.571	8	0	0	0		8	7.75	7.937	7.875	0.25			11.571	11.795	-0.224		11.75	11.929	-0.179		11.375	10.437	7.687	11.8	10.487	8.058		11.562	10.437	8.562	11.797	10.564	8.447		11.625	10.125	7.875	11.797	10.495	8.108		11.687	11.937	11.75	11.901	11.942	11.927
11.571	8	0	0	0		8	7.812	7.937	7.875	0.188			11.571	11.794	-0.223		11.75	11.929	-0.179		11.312	10.5	7.687	11.8	10.487	8.055		11.562	10.375	8.562	11.797	10.564	8.445		11.625	10.125	7.875	11.796	10.494	8.105		11.687	11.937	11.75	11.9	11.942	11.927
11.571	8	0	0	0		8	7.812	7.937	7.875	0.188			11.571	11.794	-0.223		11.75	11.929	-0.179		11.375	10.437	7.687	11.799	10.486	8.052		11.562	10.375	8.562	11.796	10.563	8.442		11.625	10.125	7.875	11.796	10.493	8.102		11.687	11.937	11.75	11.9	11.942	11.927
11.571	8	0	0	0		8	7.812	7.937	7.875	0.188			11.571	11.793	-0.222		11.687	11.929	-0.242		11.375	10.5	7.687	11.799	10.485	8.049		11.562	10.375	8.562	11.796	10.563	8.44		11.625	10.125	7.875	11.795	10.493	8.099		11.687	11.937	11.75	11.899	11.942	11.927
11.571	8	0	0	0		8	7.812	7.937	7.875	0.188			11.571	11.792	-0.221		11.687	11.929	-0.242		11.375	10.437	7.687	11.798	10.485	8.046		11.562	10.375	8.562	11.795	10.562	8.437		11.625	10.125	7.875	11.795	10.492	8.096		11.687	11.937	11.75	11.899	11.942	11.927
11.571	8	0	0	0		8	7.812	7.937	7.875	0.188			11.571	11.792	-0.221		11.75	11.929	-0.179		11.375	10.437	7.687	11.798	10.484	8.043		11.562	10.375	8.562	11.795	10.562	8.435		11.625	10.125	7.875	11.794	10.491	8.093		11.687	11.937	11.75	11.898	11.941	11.927
11.571	8	0	0	0		8	7.75	7.937	7.875	0.25			11.571	11.791	-0.22		11.687	11.929	-0.242		11.375	10.437	7.687	11.797	10.483	8.04		11.562	10.375	8.562	11.794	10.561	8.433		11.625	10.125	7.875	11.794	10.491	8.09		11.687	11.937	11.75	11.898	11.941	11.927
11.571	8	0	0	0		8	7.75	7.937	7.875	0.25			11.571	11.791	-0.22		11.687	11.929	-0.242		11.375	10.437	7.625	11.797	10.482	8.037		11.562	10.375	8.562	11.794	10.56	8.43		11.625	10.125	7.875	11.793	10.49	8.087		11.687	11.937	11.75	11.898	11.941	11.927
11.571	8	0	0	0		8	7.812	7.937	7.875	0.188			11.571	11.79	-0.219		11.687	11.929	-0.242		11.375	10.437	7.625	11.796	10.482	8.034		11.562	10.375	8.562	11.793	10.56	8.428		11.625	10.125	7.812	11.793	10.489	8.084		11.687	11.937	11.75	11.897	11.941	11.927
11.571	8	0	0	0		8	7.75	7.937	7.875	0.25			11.571	11.79	-0.219		11.75	11.929	-0.179		11.375	10.437	7.625	11.796	10.481	8.031		11.562	10.375	8.562	11.793	10.559	8.425		11.625	10.125	7.875	11.792	10.489	8.081		11.687	11.937	11.75	11.897	11.941	11.927
11.571	8	0	0	0		8	7.75	7.937	7.875	0.25			11.571	11.789	-0.218		11.687	11.928	-0.241		11.375	10.437	7.625	11.795	10.48	8.028		11.562	10.437	8.562	11.792	10.559	8.423		11.625	10.125	7.875	11.792	10.488	8.078		11.687	11.937	11.75	11.896	11.941	11.927
11.571	8	0	0	0		8	7.75	7.937	7.875	0.25			11.571	11.789	-0.218		11.687	11.928	-0.241		11.375	10.437	7.625	11.795	10.48	8.025		11.562	10.375	8.562	11.792	10.558	8.42		11.625	10.125	7.875	11.791	10.487	8.075		11.687	11.937	11.75	11.896	11.94	11.928
11.571	8	0	0	0		8	7.75	7.937	7.875	0.25			11.571	11.788	-0.217		11.75	11.928	-0.178		11.375	10.437	7.625	11.794	10.479	8.022		11.562	10.375	8.562	11.791	10.558	8.418		11.625	10.125	7.875	11.791	10.487	8.072		11.687	11.937	11.75	11.895	11.94	11.928
11.571	7.937	0	0	0		7.937	7.75	7.875	7.875	0.187			11.571	11.788	-0.217		11.687	11.928	-0.241		11.375	10.437	7.625	11.794	10.478	8.019		11.562	10.375	8.562	11.791	10.557	8.415		11.625	10.125	7.812	11.79	10.486	8.069		11.687	11.937	11.75	11.895	11.94	11.928
11.571	8	0	0	0		8	7.75	7.937	7.875	0.25			11.571	11.787	-0.216		11.687	11.928	-0.241		11.375	10.437	7.625	11.793	10.477	8.016		11.562	10.375	8.562	11.79	10.557	8.413		11.625	10.125	7.812	11.79	10.485	8.066		11.687	11.937	11.75	11.895	11.94	11.928
11.571	8	0	0	0		8	7.812	7.937	7.875	0.188			11.571	11.787	-0.216		11.687	11.928	-0.241		11.375	10.437	7.625	11.793	10.477	8.013		11.562	10.375	8.562	11.79	10.556	8.41		11.625	10.125	7.812	11.789	10.484	8.063		11.687	11.937	11.75	11.894	11.94	11.928
11.571	8	0	0	0		8	7.812	7.937	7.875	0.188			11.571	11.786	-0.215		11.687	11.928	-0.241		11.375	10.437	7.625	11.792	10.476	8.01		11.562	10.375	8.5	11.789	10.555	8.408		11.625	10.125	7.812	11.789	10.484	8.061		11.687	11.937	11.75	11.894	11.94	11.928
11.571	8	0	0	0		8	7.812	7.937	7.875	0.188			11.571	11.786	-0.215		11.687	11.928	-0.241		11.375	10.437	7.625	11.792	10.475	8.007		11.562	10.375	8.5	11.789	10.555	8.405		11.625	10.125	7.812	11.788	10.483	8.058		11.687	11.937	11.75	11.893	11.939	11.928
11.571	8	0	0	0		8	7.812	7.937	7.875	0.188			11.571	11.785	-0.214		11.75	11.928	-0.178		11.375	10.437	7.625	11.792	10.475	8.004		11.562	10.375	8.562	11.789	10.554	8.403		11.625	10.125	7.812	11.788	10.482	8.055		11.687	11.937	11.75	11.893	11.939	11.928
11.571	8	0	0	0		8	7.812	7.937	7.875	0.188			11.571	11.784	-0.213		11.687	11.928	-0.241		11.375	10.437	7.625	11.791	10.474	8.001		11.562	10.375	8.5	11.788	10.554	8.401		11.625	10.125	7.812	11.788	10.482	8.052		11.687	11.937	11.75	11.892	11.939	11.928
11.571	8	0	0	0		8	7.75	7.937	7.812	0.25			11.571	11.784	-0.213		11.687	11.928	-0.241		11.375	10.437	7.625	11.791	10.473	7.998		11.562	10.375	8.5	11.788	10.553	8.398		11.625	10.062	7.812	11.787	10.481	8.049		11.75	11.937	11.75	11.892	11.939	11.928
11.571	8	0	0	0		8	7.75	7.937	7.812	0.25			11.571	11.783	-0.212		11.75	11.928	-0.178		11.375	10.437	7.625	11.79	10.472	7.995		11.562	10.375	8.5	11.787	10.553	8.396		11.625	10.125	7.875	11.787	10.48	8.046		11.687	11.937	11.75	11.891	11.939	11.928
11.571	8	0	0	0		8	7.75	7.937	7.812	0.25			11.571	11.783	-0.212		11.687	11.928	-0.241		11.375	10.437	7.625	11.79	10.472	7.992		11.562	10.375	8.5	11.787	10.552	8.393		11.625	10.125	7.875	11.786	10.48	8.043		11.687	11.937	11.75	11.891	11.939	11.928
11.571	8	0	0	0		8	7.812	7.937	7.812	0.188			11.571	11.782	-0.211		11.75	11.928	-0.178		11.375	10.437	7.562	11.789	10.471	7.989		11.562	10.375	8.5	11.786	10.552	8.391		11.625	10.125	7.812	11.786	10.479	8.04		11.687	11.937	11.75	11.891	11.938	11.928
11.571	8	0	0	0		8	7.812	7.937	7.812	0.188			11.571	11.782	-0.211		11.75	11.928	-0.178		11.375	10.437	7.625	11.789	10.47	7.986		11.562	10.375	8.5	11.786	10.551	8.388		11.625	10.062	7.812	11.785	10.478	8.037		11.687	11.937	11.75	11.89	11.938	11.928
11.571	8	0	0	0		8	7.75	7.937	7.812	0.25			11.571	11.781	-0.21		11.687	11.928	-0.241		11.375	10.437	7.562	11.788	10.47	7.983		11.562	10.375	8.5	11.785	10.55	8.386		11.625	10.125	7.812	11.785	10.478	8.034		11.687	11.937	11.75	11.89	11.938	11.928
11.571	8	0	0	0		8	7.75	7.937	7.812	0.25			11.571	11.781	-0.21		11.687	11.927	-0.24		11.375	10.437	7.562	11.788	10.469	7.98		11.562	10.375	8.5	11.785	10.55	8.383		11.625	10.062	7.812	11.784	10.477	8.031		11.687	11.937	11.75	11.889	11.938	11.928
11.571	8	0	0	0		8	7.75	7.875	7.812	0.25			11.571	11.78	-0.209		11.75	11.927	-0.177		11.375	10.437	7.562	11.787	10.468	7.977		11.562	10.375	8.5	11.784	10.549	8.381		11.625	10.125	7.812	11.784	10.476	8.028		11.687	11.937	11.75	11.889	11.938	11.928
11.571	8	0	0	0		8	7.75	7.875	7.812	0.25			11.571	11.78	-0.209		11.687	11.927	-0.24		11.375	10.437	7.562	11.787	10.467	7.974		11.562	10.375	8.5	11.784	10.549	8.378		11.625	10.062	7.812	11.783	10.475	8.025		11.687	11.937	11.75	11.888	11.938	11.928
11.571	8	0	0	0		8	7.75	7.875	7.812	0.25			11.571	11.779	-0.208		11.687	11.927	-0.24		11.375	10.437	7.562	11.786	10.467	7.971		11.562	10.375	8.5	11.783	10.548	8.376		11.625	10.125	7.812	11.783	10.475	8.022		11.687	11.937	11.75	11.888	11.937	11.928
11.571	8	0	0	0		8	7.687	7.875	7.75	0.313			11.571	11.779	-0.208		11.687	11.927	-0.24		11.312	10.437	7.562	11.786	10.466	7.968		11.562	10.375	8.5	11.783	10.548	8.374		11.625	10.125	7.812	11.782	10.474	8.019		11.687	11.937	11.75	11.887	11.937	11.928
11.571	8	0	0	0		8	7.687	7.875	7.75	0.313			11.571	11.778	-0.207		11.687	11.927	-0.24		11.375	10.437	7.562	11.785	10.465	7.965		11.562	10.375	8.5	11.782	10.547	8.371		11.625	10.062	7.812	11.782	10.473	8.016		11.687	11.937	11.75	11.887	11.937	11.928
11.571	8	0	0	0		8	7.75	7.875	7.75	0.25			11.571	11.777	-0.206		11.687	11.927	-0.24		11.375	10.437	7.562	11.785	10.464	7.962		11.562	10.375	8.5	11.782	10.547	8.369		11.625	10.125	7.812	11.781	10.473	8.013		11.687	11.937	11.75	11.887	11.937	11.928
11.571	8	0	0	0		8	7.75	7.875	7.75	0.25			11.571	11.777	-0.206		11.687	11.927	-0.24		11.375	10.437	7.562	11.784	10.464	7.959		11.562	10.375	8.5	11.781	10.546	8.366		11.625	10.125	7.812	11.781	10.472	8.01		11.687	11.937	11.75	11.886	11.937	11.928
11.571	8	0	0	0		8	7.75	7.875	7.75	0.25			11.571	11.776	-0.205		11.687	11.927	-0.24		11.375	10.437	7.5	11.784	10.463	7.956		11.562	10.375	8.5	11.781	10.545	8.364		11.625	10.062	7.812	11.78	10.471	8.007		11.687	11.937	11.75	11.886	11.937	11.928
11.571	7.937	0	0	0		7.937	7.75	7.875	7.75	0.187			11.571	11.776	-0.205		11.687	11.927	-0.24		11.375	10.437	7.5	11.783	10.462	7.953		11.562	10.375	8.5	11.78	10.545	8.361		11.625	10.062	7.812	11.78	10.471	8.004		11.687	11.937	11.75	11.885	11.936	11.928
11.571	7.937	0	0	0		7.937	7.687	7.875	7.75	0.25			11.571	11.775	-0.204		11.75	11.927	-0.177		11.375	10.437	7.5	11.783	10.462	7.95		11.562	10.375	8.5	11.78	10.544	8.359		11.625	10.062	7.812	11.779	10.47	8.002		11.687	11.937	11.75	11.885	11.936	11.928
11.571	7.937	0	0	0		7.937	7.687	7.875	7.75	0.25			11.571	11.775	-0.204		11.687	11.927	-0.24		11.375	10.437	7.5	11.782	10.461	7.948		11.562	10.375	8.5	11.779	10.544	8.357		11.625	10.062	7.812	11.779	10.469	7.999		11.687	11.937	11.75	11.884	11.936	11.928
11.571	7.937	0	0	0		7.937	7.75	7.875	7.75	0.187			11.571	11.774	-0.203		11.687	11.927	-0.24		11.375	10.437	7.5	11.782	10.46	7.945		11.562	10.375	8.5	11.779	10.543	8.354		11.625	10.062	7.812	11.778	10.468	7.997		11.687	11.937	11.75	11.884	11.936	11.928
11.571	7.937	0	0	0		7.937	7.75	7.875	7.75	0.187			11.571	11.774	-0.203		11.687	11.926	-0.239		11.312	10.437	7.5	11.781	10.459	7.943		11.562	10.375	8.5	11.778	10.542	8.352		11.625	10.062	7.812	11.778	10.467	7.995		11.687	11.937	11.75	11.883	11.936	11.928
11.571	7.937	0	0	0		7.937	7.75	7.875	7.75	0.187			11.571	11.773	-0.202		11.687	11.926	-0.239		11.375	10.437	7.5	11.781	10.458	7.941		11.562	10.375	8.5	11.778	10.541	8.35		11.625	10.062	7.812	11.777	10.466	7.992		11.687	11.937	11.75	11.883	11.935	11.928
11.571	7.937	0	0	0		7.937	7.75	7.875	7.75	0.187			11.571	11.773	-0.202		11.687	11.926	-0.239		11.375	10.437	7.5	11.78	10.457	7.939		11.562	10.375	8.5	11.777	10.541	8.347		11.625	10.062	7.812	11.777	10.466	7.99		11.687	11.937	11.75	11.883	11.935	11.928
11.571	7.937	0	0	0		7.937	7.687	7.875	7.75	0.25			11.571	11.772	-0.201		11.687	11.926	-0.239		11.375	10.437	7.5	11.78	10.456	7.936		11.562	10.375	8.437	11.777	10.54	8.345		11.625	10.062	7.812	11.776	10.465	7.988		11.687	11.937	11.75	11.882	11.935	11.928
11.571	7.937	0	0	0		7.937	7.687	7.875	7.75	0.25			11.571	11.772	-0.201		11.687	11.926	-0.239		11.375	10.437	7.5	11.779	10.456	7.934		11.562	10.375	8.437	11.776	10.539	8.343		11.625	10.062	7.812	11.776	10.464	7.985		11.687	11.937	11.75	11.882	11.935	11.928
11.571	7.937	0	0	0		7.937	7.687	7.875	7.75	0.25			11.571	11.771	-0.2		11.687	11.926	-0.239		11.375	10.437	7.5	11.779	10.455	7.932		11.562	10.375	8.437	11.776	10.539	8.34		11.625	10.062	7.812	11.775	10.463	7.983		11.687	11.937	11.75	11.881	11.935	11.927
11.571	7.937	0	0	0		7.937	7.687	7.875	7.75	0.25			11.571	11.77	-0.199		11.687	11.926	-0.239		11.375	10.437	7.5	11.778	10.454	7.929		11.562	10.375	8.437	11.775	10.538	8.338		11.625	10.062	7.75	11.775	10.462	7.981		11.687	11.937	11.75	11.881	11.934	11.927
11.571	7.937	0	0	0		7.937	7.687	7.875	7.75	0.25			11.571	11.77	-0.199		11.687	11.926	-0.239		11.375	10.437	7.5	11.778	10.453	7.927		11.562	10.375	8.437	11.775	10.537	8.336		11.625	10.062	7.75	11.774	10.461	7.978		11.687	11.937	11.75	11.88	11.934	11.927
11.571	7.937	0	0	0		7.937	7.687	7.875	7.75	0.25			11.571	11.769	-0.198		11.687	11.926	-0.239		11.375	10.437	7.5	11.777	10.452	7.925		11.562	10.375	8.437	11.774	10.536	8.333		11.625	10.062	7.812	11.774	10.461	7.976		11.687	11.937	11.75	11.88	11.934	11.927
11.571	7.937	0	0	0		7.937	7.687	7.875	7.75	0.25			11.571	11.769	-0.198		11.687	11.925	-0.238		11.375	10.437	7.5	11.777	10.451	7.923		11.562	10.375	8.437	11.774	10.536	8.331		11.625	10.062	7.812	11.773	10.46	7.974		11.687	11.937	11.75	11.879	11.934	11.927
11.571	7.937	0	0	0		7.937	7.687	7.875	7.75	0.25			11.571	11.768	-0.197		11.687	11.925	-0.238		11.375	10.437	7.5	11.776	10.45	7.92		11.562	10.375	8.437	11.773	10.535	8.329		11.625	10.062	7.75	11.773	10.459	7.971		11.687	11.937	11.75	11.879	11.934	11.927
11.571	7.937	0	0	0		7.937	7.687	7.875	7.75	0.25			11.571	11.768	-0.197		11.75	11.925	-0.175		11.375	10.437	7.5	11.776	10.45	7.918		11.562	10.375	8.437	11.773	10.534	8.326		11.625	10.062	7.75	11.772	10.458	7.969		11.687	11.937	11.75	11.878	11.933	11.927
11.571	7.875	0	0	0		7.875	7.687	7.812	7.75	0.188			11.571	11.767	-0.196		11.75	11.925	-0.175		11.312	10.437	7.5	11.775	10.449	7.916		11.562	10.375	8.5	11.772	10.534	8.324		11.625	10.062	7.75	11.772	10.457	7.967		11.687	11.937	11.75	11.878	11.933	11.927
11.571	7.937	0	0	0		7.937	7.687	7.812	7.75	0.25			11.571	11.767	-0.196		11.687	11.925	-0.238		11.312	10.437	7.5	11.775	10.448	7.913		11.562	10.375	8.437	11.772	10.533	8.322		11.625	10.062	7.75	11.771	10.456	7.964		11.75	11.937	11.75	11.877	11.933	11.927
11.571	7.937	0	0	0		7.937	7.687	7.812	7.75	0.25			11.571	11.766	-0.195		11.687	11.925	-0.238		11.375	10.437	7.5	11.774	10.447	7.911		11.562	10.375	8.437	11.771	10.532	8.319		11.625	10.062	7.75	11.771	10.455	7.962		11.687	11.937	11.75	11.877	11.933	11.927
11.571	7.875	0	0	0		7.875	7.687	7.812	7.687	0.188			11.571	11.766	-0.195		11.687	11.925	-0.238		11.375	10.437	7.5	11.774	10.446	7.909		11.562	10.375	8.437	11.771	10.532	8.317		11.625	10.062	7.75	11.77	10.455	7.96		11.687	11.937	11.75	11.876	11.932	11.927
11.571	7.875	0	0	0		7.875	7.687	7.812	7.687	0.188			11.571	11.765	-0.194		11.687	11.925	-0.238		11.375	10.437	7.5	11.773	10.445	7.907		11.562	10.375	8.437	11.77	10.531	8.315		11.625	10.062	7.75	11.77	10.454	7.957		11.687	11.937	11.75	11.876	11.932	11.927
11.571	7.875	0	0	0		7.875	7.687	7.812	7.687	0.188			11.571	11.764	-0.193		11.687	11.924	-0.237		11.375	10.437	7.5	11.773	10.444	7.904		11.562	10.375	8.437	11.77	10.53	8.312		11.625	10.062	7.75	11.769	10.453	7.955		11.687	11.937	11.75	11.876	11.932	11.927
11.571	7.875	0	0	0		7.875	7.687	7.812	7.687	0.188			11.571	11.764	-0.193		11.687	11.924	-0.237		11.375	10.437	7.437	11.772	10.443	7.902		11.562	10.375	8.437	11.769	10.529	8.31		11.625	10.062	7.75	11.769	10.452	7.953		11.687	11.937	11.75	11.875	11.932	11.927
11.571	7.937	0	0	0		7.937	7.625	7.812	7.687	0.312			11.571	11.763	-0.192		11.687	11.924	-0.237		11.375	10.437	7.437	11.772	10.443	7.9		11.562	10.375	8.437	11.769	10.529	8.308		11.625	10.062	7.75	11.768	10.451	7.95		11.687	11.937	11.75	11.875	11.932	11.927
11.571	7.937	0	0	0		7.937	7.625	7.812	7.687	0.312			11.571	11.763	-0.192		11.687	11.924	-0.237		11.375	10.437	7.437	11.771	10.442	7.897		11.562	10.375	8.437	11.768	10.528	8.305		11.625	10.062	7.75	11.768	10.45	7.948		11.687	11.937	11.75	11.874	11.931	11.927
11.571	7.937	0	0	0		7.937	7.625	7.812	7.687	0.312			11.571	11.762	-0.191		11.687	11.924	-0.237		11.375	10.437	7.437	11.771	10.441	7.895		11.562	10.375	8.437	11.768	10.527	8.303		11.625	10.062	7.75	11.767	10.45	7.946		11.687	11.937	11.75	11.874	11.931	11.927
11.571	7.937	0	0	0		7.937	7.625	7.812	7.687	0.312			11.571	11.762	-0.191		11.687	11.924	-0.237		11.375	10.437	7.437	11.77	10.44	7.893		11.562	10.375	8.437	11.767	10.527	8.301		11.625	10.062	7.75	11.767	10.449	7.943		11.687	11.937	11.75	11.873	11.931	11.927
11.571	7.937	0	0	0		7.937	7.625	7.812	7.75	0.312			11.571	11.761	-0.19		11.687	11.924	-0.237		11.375	10.437	7.437	11.77	10.439	7.891		11.562	10.375	8.437	11.767	10.526	8.298		11.625	10.062	7.75	11.766	10.448	7.941		11.687	11.937	11.75	11.873	11.931	11.927
11.571	7.937	0	0	0		7.937	7.625	7.812	7.75	0.312			11.571	11.761	-0.19		11.687	11.924	-0.237		11.375	10.437	7.437	11.769	10.438	7.888		11.562	10.375	8.437	11.766	10.525	8.296		11.625	10.062	7.75	11.766	10.447	7.939		11.687	11.937	11.75	11.872	11.931	11.927
11.571	7.937	0	0	0		7.937	7.687	7.812	7.687	0.25			11.571	11.76	-0.189		11.687	11.923	-0.236		11.375	10.437	7.437	11.769	10.437	7.886		11.562	10.375	8.437	11.766	10.524	8.294		11.625	10.062	7.75	11.765	10.446	7.936		11.687	11.937	11.75	11.872	11.93	11.927
11.571	7.875	0	0	0		7.875	7.687	7.812	7.687	0.188			11.571	11.76	-0.189		11.687	11.923	-0.236		11.375	10.437	7.437	11.768	10.437	7.884		11.562	10.375	8.437	11.765	10.524	8.291		11.625	10.062	7.75	11.765	10.445	7.934		11.687	11.937	11.75	11.871	11.93	11.927
11.571	7.875	0	0	0		7.875	7.687	7.812	7.687	0.188			11.571	11.759	-0.188		11.687	11.923	-0.236		11.375	10.437	7.437	11.768	10.436	7.881		11.562	10.375	8.437	11.765	10.523	8.289		11.625	10.062	7.75	11.764	10.444	7.932		11.687	11.937	11.75	11.871	11.93	11.926
11.571	7.875	0	0	0		7.875	7.687	7.812	7.687	0.188			11.571	11.758	-0.187		11.687	11.923	-0.236		11.375	10.437	7.437	11.767	10.435	7.879		11.562	10.375	8.437	11.764	10.522	8.287		11.625	10.062	7.75	11.764	10.444	7.929		11.687	11.937	11.75	11.87	11.93	11.926
11.571	7.875	0	0	0		7.875	7.687	7.812	7.687	0.188			11.571	11.758	-0.187		11.75	11.923	-0.173		11.375	10.437	7.437	11.767	10.434	7.877		11.562	10.375	8.437	11.764	10.522	8.284		11.625	10.062	7.75	11.763	10.443	7.927		11.687	11.937	11.75	11.87	11.93	11.926
11.571	7.875	0	0	0		7.875	7.687	7.812	7.687	0.188			11.571	11.757	-0.186		11.687	11.923	-0.236		11.375	10.437	7.437	11.766	10.433	7.875		11.562	10.375	8.437	11.763	10.521	8.282		11.625	10.062	7.75	11.763	10.442	7.925		11.687	11.937	11.75	11.87	11.929	11.926
11.571	7.875	0	0	0		7.875	7.687	7.812	7.687	0.188			11.571	11.757	-0.186		11.687	11.923	-0.236		11.375	10.375	7.437	11.766	10.432	7.872		11.562	10.375	8.437	11.763	10.52	8.28		11.625	10.062	7.75	11.762	10.441	7.922		11.687	11.937	11.75	11.869	11.929	11.926
11.571	7.875	0	0	0		7.875	7.687	7.812	7.687	0.188			11.571	11.756	-0.185		11.687	11.923	-0.236		11.375	10.437	7.437	11.765	10.431	7.87		11.562	10.375	8.375	11.762	10.519	8.277		11.625	10.062	7.75	11.762	10.44	7.92		11.687	11.937	11.75	11.869	11.929	11.926
11.571	7.937	0	0	0		7.937	7.687	7.812	7.687	0.25			11.571	11.756	-0.185		11.687	11.922	-0.235		11.375	10.437	7.437	11.765	10.431	7.868		11.562	10.375	8.375	11.762	10.519	8.275		11.625	10.062	7.75	11.761	10.439	7.918		11.687	11.937	11.75	11.868	11.929	11.926
11.571	7.937	0	0	0		7.937	7.687	7.875	7.687	0.25			11.571	11.755	-0.184		11.687	11.922	-0.235		11.375	10.437	7.437	11.764	10.43	7.866		11.562	10.375	8.437	11.761	10.518	8.273		11.625	10.062	7.75	11.761	10.439	7.915		11.687	11.937	11.75	11.868	11.929	11.926
11.571	7.937	0	0	0		7.937	7.75	7.875	7.687	0.25			11.571	11.755	-0.184		11.687	11.922	-0.235		11.375	10.375	7.437	11.764	10.429	7.863		11.562	10.375	8.375	11.761	10.517	8.27		11.625	10.062	7.75	11.76	10.438	7.913		11.687	11.937	11.75	11.867	11.928	11.926
11.58	7.937	0	0	0		7.937	7.687	7.875	7.687	0.25			11.58	11.754	-0.174		11.687	11.922	-0.235		11.375	10.437	7.437	11.763	10.428	7.861		11.562	10.375	8.375	11.76	10.517	8.268		11.625	10.062	7.75	11.759	10.437	7.911		11.687	11.937	11.75	11.867	11.928	11.926
11.571	7.937	0	0	0		7.937	7.75	7.875	7.687	0.25			11.571	11.754	-0.183		11.687	11.922	-0.235		11.375	10.375	7.437	11.763	10.427	7.859		11.562	10.375	8.375	11.76	10.516	8.266		11.625	10.062	7.75	11.759	10.436	7.908		11.687	11.937	11.75	11.866	11.928	11.926
11.571	7.937	0	0	0		7.937	7.75	7.875	7.687	0.25			11.571	11.753	-0.182		11.687	11.922	-0.235		11.375	10.437	7.437	11.762	10.426	7.856		11.562	10.375	8.375	11.759	10.515	8.263		11.625	10.062	7.75	11.758	10.435	7.906		11.687	11.937	11.75	11.866	11.928	11.926
11.571	7.875	0	0	0		7.875	7.75	7.875	7.687	0.188			11.571	11.752	-0.181		11.687	11.922	-0.235		11.375	10.375	7.437	11.762	10.425	7.854		11.562	10.375	8.375	11.759	10.515	8.261		11.625	10.062	7.75	11.758	10.434	7.904		11.687	11.937	11.687	11.865	11.928	11.926
11.571	7.875	0	0	0		7.875	7.75	7.875	7.687	0.188			11.571	11.752	-0.181		11.687	11.922	-0.235		11.375	10.375	7.437	11.761	10.424	7.852		11.562	10.375	8.375	11.758	10.514	8.259		11.625	10.062	7.75	11.757	10.434	7.901		11.687	11.937	11.75	11.865	11.927	11.926
11.571	7.937	0	0	0		7.937	7.75	7.875	7.687	0.25			11.571	11.751	-0.18		11.687	11.921	-0.234		11.312	10.375	7.437	11.761	10.424	7.85		11.562	10.375	8.375	11.758	10.513	8.256		11.625	10.062	7.75	11.757	10.433	7.899		11.687	11.937	11.75	11.864	11.927	11.926
11.571	7.937	0	0	0		7.937	7.75	7.875	7.687	0.25			11.571	11.751	-0.18		11.687	11.921	-0.234		11.375	10.375	7.437	11.76	10.423	7.847		11.562	10.375	8.375	11.757	10.512	8.254		11.625	10.062	7.75	11.756	10.432	7.897		11.687	11.937	11.75	11.864	11.927	11.926
11.571	7.937	0	0	0		7.937	7.687	7.875	7.687	0.25			11.571	11.75	-0.179		11.687	11.921	-0.234		11.375	10.375	7.437	11.76	10.422	7.845		11.562	10.375	8.375	11.757	10.512	8.252		11.625	10.062	7.75	11.756	10.431	7.894		11.687	11.937	11.75	11.863	11.927	11.926
11.571	7.937	0	0	0		7.937	7.75	7.875	7.687	0.25			11.571	11.75	-0.179		11.687	11.921	-0.234		11.312	10.375	7.437	11.759	10.421	7.843		11.562	10.375	8.375	11.756	10.511	8.249		11.625	10.062	7.75	11.755	10.43	7.892		11.687	11.937	11.75	11.863	11.927	11.926
11.571	8	0	0	0		8	7.75	7.937	7.75	0.25			11.571	11.749	-0.178		11.687	11.921	-0.234		11.375	10.375	7.437	11.759	10.42	7.84		11.562	10.375	8.375	11.756	10.51	8.247		11.625	10.062	7.75	11.755	10.429	7.89		11.687	11.937	11.75	11.863	11.926	11.926
11.571	8	0	0	0		8	7.75	7.875	7.75	0.25			11.571	11.749	-0.178		11.687	11.921	-0.234		11.375	10.375	7.437	11.758	10.419	7.838		11.562	10.375	8.375	11.755	10.51	8.245		11.625	10.062	7.75	11.754	10.428	7.887		11.687	11.937	11.687	11.862	11.926	11.926
11.571	7.937	0	0	0		7.937	7.75	7.937	7.75	0.187			11.571	11.748	-0.177		11.687	11.921	-0.234		11.375	10.375	7.437	11.758	10.418	7.836		11.562	10.375	8.375	11.755	10.509	8.242		11.625	10.062	7.75	11.754	10.428	7.885		11.687	11.937	11.75	11.862	11.926	11.926
11.571	8	0	0	0		8	7.75	7.937	7.75	0.25			11.571	11.747	-0.176		11.687	11.921	-0.234		11.375	10.375	7.437	11.757	10.418	7.834		11.562	10.375	8.375	11.754	10.508	8.24		11.625	10.062	7.75	11.753	10.427	7.883		11.687	11.937	11.75	11.861	11.926	11.925
11.571	7.937	0	0	0		7.937	7.75	7.937	7.687	0.25			11.571	11.747	-0.176		11.687	11.92	-0.233		11.375	10.375	7.437	11.757	10.417	7.831		11.562	10.375	8.375	11.754	10.507	8.238		11.625	10.062	7.75	11.753	10.426	7.88		11.687	11.937	11.75	11.861	11.926	11.925
11.571	7.937	0	0	0		7.937	7.75	7.875	7.687	0.25			11.571	11.746	-0.175		11.687	11.92	-0.233		11.375	10.375	7.437	11.756	10.416	7.829		11.562	10.375	8.375	11.753	10.507	8.235		11.625	10.062	7.75	11.752	10.425	7.878		11.687	11.937	11.75	11.86	11.925	11.925
11.571	7.937	0	0	0		7.937	7.75	7.937	7.75	0.187			11.571	11.746	-0.175		11.687	11.92	-0.233		11.375	10.375	7.437	11.756	10.415	7.827		11.562	10.375	8.375	11.753	10.506	8.233		11.625	10.062	7.75	11.752	10.424	7.876		11.687	11.937	11.687	11.86	11.925	11.925
11.571	8	0	0	0		8	7.75	7.875	7.75	0.25			11.571	11.745	-0.174		11.687	11.92	-0.233		11.375	10.375	7.437	11.755	10.414	7.824		11.562	10.375	8.375	11.752	10.505	8.231		11.625	10.062	7.75	11.751	10.423	7.873		11.687	11.937	11.75	11.859	11.925	11.925
11.571	7.937	0	0	0		7.937	7.75	7.875	7.75	0.187			11.571	11.745	-0.174		11.687	11.92	-0.233		11.375	10.375	7.437	11.755	10.413	7.822		11.562	10.375	8.375	11.752	10.505	8.228		11.625	10.062	7.75	11.751	10.423	7.871		11.687	11.937	11.75	11.859	11.925	11.925
11.571	7.937	0	0	0		7.937	7.75	7.875	7.75	0.187			11.571	11.744	-0.173		11.687	11.92	-0.233		11.375	10.375	7.437	11.754	10.412	7.82		11.562	10.375	8.375	11.751	10.504	8.226		11.625	10.062	7.75	11.75	10.422	7.869		11.687	11.937	11.75	11.858	11.924	11.925
11.571	7.937	0	0	0		7.937	7.687	7.875	7.75	0.25			11.571	11.744	-0.173		11.687	11.92	-0.233		11.375	10.375	7.437	11.754	10.412	7.818		11.562	10.375	8.375	11.751	10.503	8.224		11.625	10.062	7.75	11.75	10.421	7.866		11.687	11.937	11.75	11.858	11.924	11.925
11.571	7.937	0	0	0		7.937	7.687	7.875	7.75	0.25			11.571	11.743	-0.172		11.687	11.92	-0.233		11.375	10.375	7.437	11.753	10.411	7.815		11.562	10.375	8.375	11.75	10.502	8.221		11.625	10.062	7.75	11.749	10.42	7.864		11.687	11.937	11.687	11.857	11.924	11.925
11.571	7.937	0	0	0		7.937	7.687	7.875	7.687	0.25			11.571	11.743	-0.172		11.687	11.92	-0.233		11.375	10.375	7.437	11.753	10.41	7.813		11.562	10.375	8.375	11.75	10.502	8.219		11.625	10.062	7.75	11.749	10.419	7.862		11.687	11.937	11.75	11.857	11.924	11.925
11.58	7.937	0	0	0		7.937	7.687	7.875	7.687	0.25			11.58	11.742	-0.162		11.687	11.919	-0.232		11.375	10.375	7.437	11.752	10.409	7.811		11.562	10.375	8.375	11.749	10.501	8.217		11.625	10.062	7.75	11.748	10.418	7.859		11.687	11.937	11.687	11.857	11.924	11.925
11.571	7.875	0	0	0		7.875	7.687	7.875	7.687	0.188			11.571	11.741	-0.17		11.687	11.919	-0.232		11.375	10.375	7.437	11.752	10.408	7.808		11.562	10.375	8.375	11.749	10.5	8.214		11.625	10.062	7.75	11.748	10.417	7.857		11.687	11.937	11.75	11.856	11.923	11.925
11.571	7.875	0	0	0		7.875	7.687	7.812	7.687	0.188			11.571	11.741	-0.17		11.687	11.919	-0.232		11.375	10.375	7.375	11.751	10.407	7.806		11.562	10.375	8.375	11.748	10.5	8.212		11.625	10.062	7.75	11.747	10.417	7.855		11.687	11.937	11.75	11.856	11.923	11.925
11.571	7.875	0	0	0		7.875	7.625	7.812	7.687	0.25			11.571	11.74	-0.169		11.687	11.919	-0.232		11.312	10.375	7.437	11.751	10.406	7.804		11.562	10.375	8.375	11.748	10.499	8.21		11.625	10.062	7.75	11.747	10.416	7.853		11.687	11.937	11.75	11.855	11.923	11.925
11.58	7.875	0	0	0		7.875	7.625	7.812	7.687	0.25			11.58	11.74	-0.16		11.687	11.919	-0.232		11.375	10.375	7.375	11.75	10.406	7.802		11.562	10.375	8.375	11.747	10.498	8.207		11.625	10.062	7.75	11.746	10.415	7.85		11.687	11.937	11.75	11.855	11.923	11.925
11.571	7.875	0	0	0		7.875	7.625	7.812	7.687	0.25			11.571	11.739	-0.168		11.687	11.919	-0.232		11.312	10.375	7.375	11.75	10.405	7.799		11.562	10.375	8.375	11.746	10.497	8.205		11.625	10	7.687	11.746	10.414	7.848		11.687	11.937	11.75	11.854	11.923	11.925
11.571	7.812	0	0	0		7.812	7.562	7.812	7.625	0.25			11.571	11.739	-0.168		11.687	11.919	-0.232		11.312	10.375	7.375	11.749	10.404	7.797		11.562	10.375	8.375	11.746	10.497	8.203		11.625	10.062	7.687	11.745	10.413	7.846		11.687	11.937	11.75	11.854	11.922	11.925
11.571	7.75	0	0	0		7.75	7.562	7.75	7.625	0.188			11.571	11.738	-0.167		11.687	11.919	-0.232		11.312	10.375	7.375	11.749	10.403	7.795		11.562	10.375	8.375	11.745	10.496	8.2		11.625	10.062	7.687	11.745	10.412	7.843		11.687	11.937	11.75	11.853	11.922	11.925
11.571	7.75	0	0	0		7.75	7.562	7.75	7.625	0.188			11.571	11.738	-0.167		11.687	11.918	-0.231		11.375	10.375	7.375	11.748	10.402	7.793		11.562	10.375	8.375	11.745	10.495	8.198		11.625	10.062	7.687	11.744	10.412	7.841		11.687	11.937	11.75	11.853	11.922	11.925
11.571	7.75	0	0	0		7.75	7.562	7.75	7.625	0.188			11.571	11.737	-0.166		11.687	11.918	-0.231		11.312	10.375	7.375	11.747	10.401	7.79		11.562	10.375	8.375	11.744	10.495	8.196		11.625	10.062	7.687	11.744	10.411	7.838		11.687	11.937	11.75	11.852	11.922	11.925
11.571	7.75	0	0	0		7.75	7.562	7.75	7.625	0.188			11.571	11.737	-0.166		11.687	11.918	-0.231		11.375	10.375	7.375	11.747	10.4	7.788		11.562	10.375	8.312	11.744	10.494	8.193		11.625	10	7.687	11.743	10.41	7.836		11.687	11.937	11.75	11.852	11.922	11.925
11.571	7.812	0	0	0		7.812	7.562	7.75	7.625	0.25			11.571	11.736	-0.165		11.687	11.918	-0.231		11.375	10.375	7.375	11.746	10.399	7.786		11.562	10.375	8.312	11.743	10.493	8.191		11.625	10.062	7.687	11.743	10.409	7.834		11.687	11.937	11.75	11.851	11.921	11.924
11.571	7.75	0	0	0		7.75	7.562	7.75	7.625	0.188			11.571	11.735	-0.164		11.687	11.918	-0.231		11.375	10.375	7.375	11.746	10.399	7.783		11.562	10.375	8.312	11.743	10.493	8.189		11.625	10	7.687	11.742	10.408	7.832		11.75	11.937	11.75	11.851	11.921	11.924
11.571	7.75	0	0	0		7.75	7.5	7.687	7.625	0.25			11.571	11.735	-0.164		11.687	11.918	-0.231		11.312	10.375	7.375	11.745	10.398	7.781		11.562	10.375	8.375	11.742	10.492	8.186		11.625	10	7.687	11.742	10.407	7.829		11.687	11.937	11.687	11.851	11.921	11.924
11.571	7.687	0	0	0		7.687	7.5	7.687	7.625	0.187			11.571	11.734	-0.163		11.687	11.918	-0.231		11.375	10.375	7.375	11.745	10.397	7.779		11.562	10.375	8.312	11.742	10.491	8.184		11.625	10.062	7.687	11.741	10.407	7.827		11.687	11.937	11.75	11.85	11.921	11.924
11.571	7.687	0	0	0		7.687	7.5	7.625	7.625	0.187			11.571	11.734	-0.163		11.687	11.918	-0.231		11.375	10.375	7.375	11.744	10.396	7.777		11.562	10.375	8.312	11.741	10.49	8.182		11.625	10	7.625	11.741	10.406	7.825		11.687	11.937	11.75	11.85	11.921	11.924
11.58	7.687	0	0	0		7.687	7.5	7.625	7.625	0.187			11.58	11.733	-0.153		11.687	11.917	-0.23		11.375	10.375	7.375	11.744	10.395	7.774		11.562	10.375	8.312	11.741	10.49	8.179		11.625	10.062	7.625	11.74	10.405	7.822		11.687	11.937	11.75	11.849	11.92	11.924
11.571	7.687	0	0	0		7.687	7.437	7.625	7.625	0.25			11.571	11.733	-0.162		11.687	11.917	-0.23		11.312	10.375	7.375	11.743	10.394	7.772		11.562	10.375	8.312	11.74	10.489	8.177		11.625	10	7.625	11.74	10.404	7.82		11.687	11.937	11.75	11.849	11.92	11.924
11.571	7.625	0	0	0		7.625	7.437	7.625	7.625	0.188			11.571	11.732	-0.161		11.687	11.917	-0.23		11.312	10.375	7.375	11.743	10.393	7.77		11.562	10.375	8.312	11.74	10.488	8.175		11.625	10	7.625	11.739	10.403	7.818		11.687	11.937	11.75	11.848	11.92	11.924
11.571	7.625	0	0	0		7.625	7.437	7.625	7.625	0.188			11.571	11.732	-0.161		11.687	11.917	-0.23		11.375	10.375	7.375	11.742	10.393	7.767		11.562	10.375	8.312	11.739	10.488	8.173		11.625	10	7.625	11.739	10.402	7.815		11.687	11.937	11.75	11.848	11.92	11.924
11.571	7.625	0	0	0		7.625	7.437	7.625	7.625	0.188			11.571	11.731	-0.16		11.687	11.917	-0.23		11.312	10.375	7.375	11.742	10.392	7.765		11.562	10.375	8.312	11.739	10.487	8.17		11.625	10	7.625	11.738	10.401	7.813		11.687	11.937	11.75	11.847	11.92	11.924
11.571	7.625	0	0	0		7.625	7.437	7.625	7.625	0.188			11.571	11.731	-0.16		11.687	11.917	-0.23		11.375	10.375	7.375	11.741	10.391	7.763		11.562	10.375	8.312	11.738	10.486	8.168		11.625	10	7.562	11.738	10.401	7.811		11.687	11.937	11.75	11.847	11.919	11.924
11.571	7.687	0	0	0		7.687	7.5	7.625	7.625	0.187			11.571	11.73	-0.159		11.687	11.917	-0.23		11.375	10.375	7.375	11.741	10.39	7.761		11.562	10.375	8.312	11.738	10.485	8.166		11.625	10	7.562	11.737	10.4	7.808		11.687	11.937	11.75	11.846	11.919	11.924
11.571	7.687	0	0	0		7.687	7.5	7.625	7.625	0.187			11.571	11.729	-0.158		11.687	11.917	-0.23		11.312	10.375	7.375	11.74	10.389	7.758		11.562	10.375	8.312	11.737	10.485	8.163		11.625	10.062	7.562	11.737	10.399	7.806		11.687	11.937	11.75	11.846	11.919	11.924
11.571	7.687	0	0	0		7.687	7.5	7.625	7.625	0.187			11.571	11.729	-0.158		11.687	11.916	-0.229		11.312	10.375	7.375	11.74	10.388	7.756		11.562	10.375	8.312	11.737	10.484	8.161		11.625	10	7.562	11.736	10.398	7.804		11.687	11.937	11.687	11.845	11.919	11.924
11.571	7.687	0	0	0		7.687	7.5	7.687	7.562	0.187			11.571	11.728	-0.157		11.687	11.916	-0.229		11.312	10.375	7.375	11.739	10.387	7.754		11.562	10.375	8.312	11.736	10.483	8.159		11.625	10	7.562	11.736	10.397	7.801		11.687	11.937	11.75	11.845	11.919	11.924
11.571	7.687	0	0	0		7.687	7.5	7.625	7.625	0.187			11.571	11.728	-0.157		11.687	11.916	-0.229		11.312	10.375	7.375	11.739	10.387	7.751		11.562	10.375	8.312	11.736	10.483	8.156		11.625	10	7.562	11.735	10.396	7.799		11.687	11.937	11.75	11.845	11.918	11.924
11.571	7.687	0	0	0		7.687	7.562	7.687	7.562	0.125			11.571	11.727	-0.156		11.687	11.916	-0.229		11.312	10.375	7.375	11.738	10.386	7.749		11.562	10.375	8.312	11.735	10.482	8.154		11.625	10	7.562	11.735	10.396	7.797		11.687	11.937	11.75	11.844	11.918	11.924
11.571	7.75	0	0	0		7.75	7.562	7.687	7.625	0.188			11.571	11.727	-0.156		11.687	11.916	-0.229		11.375	10.375	7.375	11.738	10.385	7.747		11.562	10.375	8.312	11.735	10.481	8.152		11.625	10	7.562	11.734	10.395	7.794		11.687	11.937	11.75	11.844	11.918	11.924
11.571	7.687	0	0	0		7.687	7.562	7.687	7.625	0.125			11.571	11.726	-0.155		11.687	11.916	-0.229		11.312	10.375	7.375	11.737	10.384	7.745		11.562	10.375	8.312	11.734	10.48	8.149		11.625	10	7.562	11.734	10.394	7.792		11.687	11.937	11.75	11.843	11.918	11.924
11.571	7.687	0	0	0		7.687	7.5	7.687	7.625	0.187			11.571	11.726	-0.155		11.687	11.916	-0.229		11.312	10.375	7.375	11.737	10.383	7.742		11.562	10.375	8.312	11.734	10.48	8.147		11.625	10	7.562	11.733	10.393	7.79		11.687	11.937	11.687	11.843	11.917	11.924
11.571	7.687	0	0	0		7.687	7.5	7.687	7.625	0.187			11.571	11.725	-0.154		11.687	11.916	-0.229		11.375	10.312	7.375	11.736	10.382	7.74		11.562	10.375	8.312	11.733	10.479	8.145		11.625	10	7.562	11.733	10.392	7.787		11.687	11.937	11.75	11.842	11.917	11.924
11.571	7.687	0	0	0		7.687	7.562	7.687	7.625	0.125			11.571	11.725	-0.154		11.687	11.915	-0.228		11.375	10.375	7.375	11.736	10.381	7.738		11.562	10.375	8.312	11.733	10.478	8.142		11.625	10	7.625	11.732	10.391	7.785		11.687	11.937	11.75	11.842	11.917	11.923
11.571	7.75	0	0	0		7.75	7.5	7.687	7.625	0.25			11.571	11.724	-0.153		11.687	11.915	-0.228		11.312	10.375	7.375	11.735	10.381	7.735		11.562	10.375	8.312	11.732	10.478	8.14		11.625	10	7.625	11.732	10.39	7.783		11.687	11.937	11.75	11.841	11.917	11.923
11.571	7.75	0	0	0		7.75	7.562	7.687	7.625	0.188			11.571	11.723	-0.152		11.687	11.915	-0.228		11.375	10.375	7.375	11.735	10.38	7.733		11.562	10.375	8.312	11.732	10.477	8.138		11.625	10	7.562	11.731	10.39	7.78		11.687	11.937	11.75	11.841	11.917	11.923
11.571	7.75	0	0	0		7.75	7.562	7.687	7.562	0.188			11.571	11.723	-0.152		11.687	11.915	-0.228		11.375	10.312	7.375	11.734	10.379	7.731		11.562	10.375	8.312	11.731	10.476	8.135		11.625	10	7.625	11.73	10.389	7.778		11.687	11.937	11.75	11.84	11.916	11.923
11.571	7.687	0	0	0		7.687	7.562	7.75	7.562	0.188			11.571	11.722	-0.151		11.687	11.915	-0.228		11.312	10.375	7.375	11.734	10.378	7.729		11.562	10.375	8.312	11.731	10.476	8.133		11.625	10	7.625	11.73	10.388	7.776		11.687	11.937	11.75	11.84	11.916	11.923
11.571	7.75	0	0	0		7.75	7.562	7.75	7.625	0.188			11.571	11.722	-0.151		11.687	11.915	-0.228		11.312	10.312	7.375	11.733	10.377	7.726		11.562	10.375	8.312	11.73	10.475	8.131		11.625	10	7.562	11.729	10.387	7.773		11.687	11.937	11.687	11.839	11.916	11.923
11.571	7.75	0	0	0		7.75	7.562	7.75	7.625	0.188			11.571	11.721	-0.15		11.687	11.915	-0.228		11.312	10.312	7.375	11.733	10.376	7.724		11.562	10.375	8.25	11.73	10.474	8.128		11.625	10	7.625	11.729	10.386	7.771		11.687	11.937	11.75	11.839	11.916	11.923
11.571	7.75	0	0	0		7.75	7.562	7.75	7.625	0.188			11.571	11.721	-0.15		11.687	11.915	-0.228		11.375	10.312	7.375	11.732	10.375	7.722		11.562	10.312	8.312	11.729	10.473	8.126		11.625	10	7.625	11.728	10.385	7.769		11.687	11.937	11.75	11.838	11.916	11.923
11.571	7.75	0	0	0		7.75	7.562	7.75	7.562	0.188			11.571	11.72	-0.149		11.687	11.915	-0.228		11.312	10.375	7.375	11.732	10.374	7.719		11.562	10.312	8.25	11.729	10.473	8.124		11.625	10	7.625	11.728	10.385	7.766		11.687	11.937	11.75	11.838	11.915	11.923
11.571	7.75	0	0	0		7.75	7.562	7.75	7.562	0.188			11.571	11.72	-0.149		11.687	11.914	-0.227		11.312	10.312	7.375	11.731	10.374	7.717		11.562	10.312	8.25	11.728	10.472	8.121		11.625	10	7.625	11.727	10.384	7.764		11.75	11.937	11.75	11.838	11.915	11.923
11.571	7.75	0	0	0		7.75	7.562	7.75	7.625	0.188			11.571	11.719	-0.148		11.687	11.914	-0.227		11.375	10.312	7.375	11.731	10.373	7.715		11.562	10.312	8.25	11.728	10.471	8.119		11.625	10	7.625	11.727	10.383	7.762		11.687	11.937	11.687	11.837	11.915	11.923
11.571	7.812	0	0	0		7.812	7.562	7.75	7.562	0.25			11.571	11.718	-0.147		11.687	11.914	-0.227		11.312	10.312	7.375	11.73	10.372	7.713		11.562	10.312	8.25	11.727	10.471	8.117		11.625	10	7.625	11.726	10.382	7.759		11.687	11.937	11.75	11.837	11.915	11.923
11.571	7.812	0	0	0		7.812	7.562	7.75	7.625	0.25			11.571	11.718	-0.147		11.687	11.914	-0.227		11.312	10.375	7.375	11.73	10.371	7.71		11.562	10.375	8.25	11.727	10.47	8.114		11.625	10	7.625	11.726	10.381	7.757		11.687	11.937	11.75	11.836	11.915	11.923
11.571	7.812	0	0	0		7.812	7.562	7.75	7.625	0.25			11.571	11.717	-0.146		11.687	11.914	-0.227		11.312	10.312	7.312	11.729	10.37	7.708		11.562	10.375	8.25	11.726	10.469	8.112		11.625	10	7.625	11.725	10.38	7.755		11.687	11.937	11.687	11.836	11.914	11.923
11.571	7.75	0	0	0		7.75	7.5	7.75	7.562	0.25			11.571	11.717	-0.146		11.687	11.914	-0.227		11.312	10.375	7.312	11.729	10.369	7.706		11.562	10.312	8.25	11.726	10.468	8.11		11.625	10	7.625	11.725	10.38	7.752		11.687	11.937	11.687	11.835	11.914	11.923
11.571	7.75	0	0	0		7.75	7.5	7.75	7.562	0.25			11.571	11.716	-0.145		11.687	11.914	-0.227		11.375	10.312	7.312	11.728	10.368	7.704		11.562	10.312	8.25	11.725	10.468	8.107		11.625	10	7.625	11.724	10.379	7.75		11.687	11.937	11.687	11.835	11.914	11.923
11.571	7.687	0	0	0		7.687	7.5	7.687	7.562	0.187			11.571	11.716	-0.145		11.687	11.914	-0.227		11.312	10.312	7.312	11.728	10.368	7.701		11.562	10.312	8.25	11.725	10.467	8.105		11.625	10	7.625	11.724	10.378	7.748		11.687	11.937	11.687	11.834	11.914	11.923
11.571	7.687	0	0	0		7.687	7.5	7.687	7.562	0.187			11.571	11.715	-0.144		11.687	11.913	-0.226		11.312	10.312	7.312	11.727	10.367	7.699		11.562	10.312	8.25	11.724	10.466	8.103		11.625	10	7.562	11.723	10.377	7.745		11.687	11.937	11.75	11.834	11.914	11.923
11.571	7.625	0	0	0		7.625	7.5	7.625	7.562	0.125			11.571	11.715	-0.144		11.687	11.913	-0.226		11.312	10.312	7.312	11.727	10.366	7.697		11.562	10.312	8.25	11.724	10.466	8.1		11.625	10	7.562	11.723	10.376	7.743		11.687	11.937	11.75	11.833	11.913	11.923
11.571	7.625	0	0	0		7.625	7.437	7.625	7.562	0.188			11.571	11.714	-0.143		11.687	11.913	-0.226		11.312	10.312	7.312	11.726	10.365	7.694		11.562	10.312	8.25	11.723	10.465	8.098		11.625	10	7.562	11.722	10.375	7.741		11.687	11.937	11.75	11.833	11.913	11.923
11.571	7.625	0	0	0		7.625	7.437	7.625	7.562	0.188			11.571	11.714	-0.143		11.687	11.913	-0.226		11.312	10.312	7.312	11.726	10.364	7.692		11.562	10.312	8.25	11.723	10.464	8.096		11.625	10	7.562	11.722	10.374	7.738		11.75	11.937	11.75	11.832	11.913	11.923
11.571	7.625	0	0	0		7.625	7.437	7.562	7.562	0.188			11.571	11.713	-0.142		11.687	11.913	-0.226		11.312	10.312	7.312	11.725	10.363	7.69		11.562	10.312	8.25	11.722	10.463	8.093		11.625	10	7.562	11.721	10.374	7.736		11.687	11.937	11.687	11.832	11.913	11.923
11.571	7.562	0	0	0		7.562	7.375	7.562	7.562	0.187			11.571	11.712	-0.141		11.687	11.913	-0.226		11.375	10.312	7.312	11.725	10.362	7.688		11.562	10.312	8.25	11.722	10.463	8.091		11.625	10	7.562	11.721	10.373	7.734		11.75	11.937	11.687	11.832	11.913	11.922
11.571	7.562	0	0	0		7.562	7.375	7.562	7.562	0.187			11.571	11.712	-0.141		11.687	11.913	-0.226		11.312	10.312	7.312	11.724	10.362	7.685		11.562	10.312	8.25	11.721	10.462	8.089		11.625	10	7.562	11.72	10.372	7.731		11.687	11.937	11.687	11.831	11.912	11.922
11.571	7.625	0	0	0		7.625	7.437	7.562	7.562	0.188			11.571	11.711	-0.14		11.687	11.913	-0.226		11.312	10.312	7.312	11.724	10.361	7.683		11.562	10.312	8.25	11.721	10.461	8.086		11.625	10	7.562	11.72	10.371	7.729		11.687	11.937	11.687	11.831	11.912	11.922
11.571	7.625	0	0	0		7.625	7.437	7.562	7.562	0.188			11.571	11.711	-0.14		11.687	11.912	-0.225		11.312	10.312	7.312	11.723	10.36	7.681		11.562	10.312	8.25	11.72	10.461	8.084		11.625	10	7.5	11.719	10.37	7.727		11.687	11.937	11.687	11.83	11.912	11.922
11.571	7.562	0	0	0		7.562	7.437	7.562	7.562	0.125			11.571	11.71	-0.139		11.687	11.912	-0.225		11.312	10.312	7.312	11.723	10.359	7.678		11.562	10.312	8.25	11.72	10.46	8.082		11.625	10	7.562	11.719	10.369	7.724		11.687	11.937	11.687	11.83	11.912	11.922
11.571	7.562	0	0	0		7.562	7.375	7.562	7.5	0.187			11.571	11.71	-0.139		11.687	11.912	-0.225		11.312	10.312	7.312	11.722	10.358	7.676		11.562	10.312	8.25	11.719	10.459	8.079		11.625	10	7.5	11.718	10.369	7.722		11.687	11.937	11.75	11.829	11.912	11.922
11.571	7.562	0	0	0		7.562	7.375	7.562	7.5	0.187			11.571	11.709	-0.138		11.687	11.912	-0.225		11.312	10.312	7.312	11.722	10.357	7.674		11.562	10.312	8.25	11.719	10.459	8.077		11.625	10	7.5	11.718	10.368	7.72		11.687	11.937	11.687	11.829	11.911	11.922
11.571	7.562	0	0	0		7.562	7.375	7.562	7.5	0.187			11.571	11.709	-0.138		11.687	11.912	-0.225		11.312	10.312	7.312	11.721	10.356	7.672		11.562	10.312	8.25	11.718	10.458	8.075		11.625	10	7.5	11.717	10.367	7.717		11.687	11.937	11.687	11.828	11.911	11.922
11.571	7.625	0	0	0		7.625	7.437	7.562	7.5	0.188			11.571	11.708	-0.137		11.687	11.912	-0.225		11.375	10.312	7.312	11.721	10.355	7.669		11.562	10.312	8.25	11.718	10.457	8.072		11.625	10	7.5	11.717	10.366	7.715		11.687	11.937	11.75	11.828	11.911	11.922
11.571	7.625	0	0	0		7.625	7.437	7.562	7.5	0.188			11.571	11.708	-0.137		11.687	11.912	-0.225		11.312	10.312	7.312	11.72	10.355	7.667		11.562	10.312	8.25	11.717	10.456	8.07		11.625	10	7.5	11.716	10.365	7.713		11.687	11.937	11.75	11.827	11.911	11.922
11.571	7.562	0	0	0		7.562	7.437	7.562	7.5	0.125			11.571	11.707	-0.136		11.687	11.912	-0.225		11.312	10.312	7.312	11.72	10.354	7.665		11.562	10.312	8.25	11.717	10.456	8.068		11.625	10	7.5	11.716	10.364	7.71		11.687	11.937	11.687	11.827	11.91	11.922
11.571	7.562	0	0	0		7.562	7.375	7.562	7.5	0.187			11.571	11.706	-0.135		11.687	11.911	-0.224		11.312	10.312	7.312	11.719	10.353	7.662		11.562	10.312	8.187	11.716	10.455	8.065		11.625	10	7.5	11.715	10.363	7.708		11.687	11.937	11.75	11.826	11.91	11.922
11.571	7.562	0	0	0		7.562	7.375	7.562	7.5	0.187			11.571	11.706	-0.135		11.687	11.911	-0.224		11.312	10.312	7.312	11.719	10.352	7.66		11.562	10.312	8.25	11.716	10.454	8.063		11.625	10	7.5	11.715	10.363	7.706		11.687	11.937	11.687	11.826	11.91	11.922
11.571	7.562	0	0	0		7.562	7.437	7.562	7.5	0.125			11.571	11.705	-0.134		11.687	11.911	-0.224		11.312	10.312	7.312	11.718	10.351	7.658		11.562	10.312	8.187	11.715	10.454	8.061		11.625	10	7.5	11.714	10.362	7.703		11.687	11.937	11.75	11.826	11.91	11.922
11.571	7.562	0	0	0		7.562	7.437	7.562	7.5	0.125			11.571	11.705	-0.134		11.687	11.911	-0.224		11.312	10.312	7.312	11.718	10.35	7.656		11.562	10.312	8.187	11.715	10.453	8.058		11.625	10	7.5	11.714	10.361	7.701		11.687	11.937	11.687	11.825	11.91	11.922
11.571	7.625	0	0	0		7.625	7.5	7.562	7.5	0.125			11.571	11.704	-0.133		11.687	11.911	-0.224		11.312	10.312	7.312	11.717	10.349	7.653		11.562	10.312	8.187	11.714	10.452	8.056		11.625	10	7.5	11.713	10.36	7.699		11.687	11.937	11.75	11.825	11.909	11.922
11.571	7.625	0	0	0		7.625	7.437	7.562	7.5	0.188			11.571	11.704	-0.133		11.687	11.911	-0.224		11.312	10.312	7.312	11.717	10.349	7.651		11.562	10.312	8.187	11.714	10.451	8.054		11.625	10	7.5	11.713	10.359	7.696		11.687	11.937	11.687	11.824	11.909	11.922
11.571	7.625	0	0	0		7.625	7.437	7.625	7.5	0.188			11.571	11.703	-0.132		11.687	11.911	-0.224		11.312	10.312	7.312	11.716	10.348	7.65		11.562	10.312	8.187	11.713	10.451	8.052		11.625	10	7.5	11.712	10.358	7.695		11.687	11.937	11.687	11.824	11.909	11.922
11.571	7.625	0	0	0		7.625	7.437	7.625	7.5	0.188			11.571	11.703	-0.132		11.687	11.911	-0.224		11.312	10.312	7.312	11.716	10.347	7.648		11.562	10.312	8.187	11.713	10.45	8.05		11.625	10	7.5	11.712	10.357	7.693		11.687	11.937	11.687	11.823	11.909	11.922
11.571	7.625	0	0	0		7.625	7.437	7.625	7.5	0.188			11.571	11.702	-0.131		11.687	11.91	-0.223		11.312	10.312	7.312	11.715	10.346	7.647		11.562	10.312	8.187	11.712	10.449	8.048		11.625	10	7.5	11.711	10.356	7.692		11.687	11.937	11.75	11.823	11.909	11.921
11.571	7.625	0	0	0		7.625	7.437	7.625	7.5	0.188			11.571	11.702	-0.131		11.687	11.91	-0.223		11.312	10.312	7.312	11.715	10.345	7.645		11.562	10.312	8.187	11.712	10.448	8.046		11.625	10	7.5	11.711	10.356	7.69		11.687	11.937	11.687	11.822	11.908	11.921
11.571	7.625	0	0	0		7.625	7.375	7.625	7.5	0.25			11.571	11.701	-0.13		11.687	11.91	-0.223		11.312	10.312	7.312	11.714	10.344	7.643		11.562	10.312	8.187	11.711	10.447	8.044		11.625	10	7.5	11.71	10.355	7.688		11.687	11.937	11.687	11.822	11.908	11.921
11.571	7.625	0	0	0		7.625	7.437	7.625	7.5	0.188			11.571	11.7	-0.129		11.687	11.91	-0.223		11.312	10.312	7.312	11.713	10.343	7.642		11.562	10.312	8.187	11.71	10.446	8.043		11.625	10	7.5	11.709	10.354	7.687		11.687	11.937	11.687	11.821	11.908	11.921
11.571	7.625	0	0	0		7.625	7.375	7.625	7.5	0.25			11.571	11.7	-0.129		11.687	11.91	-0.223		11.312	10.312	7.25	11.713	10.342	7.64		11.562	10.312	8.187	11.71	10.446	8.041		11.625	10	7.5	11.709	10.353	7.685		11.75	11.937	11.687	11.821	11.908	11.921
11.571	7.625	0	0	0		7.625	7.375	7.625	7.5	0.25			11.571	11.699	-0.128		11.687	11.91	-0.223		11.312	10.312	7.25	11.712	10.341	7.639		11.562	10.312	8.187	11.709	10.445	8.039		11.625	10	7.5	11.708	10.352	7.684		11.687	11.937	11.687	11.82	11.907	11.921
11.571	7.625	0	0	0		7.625	7.375	7.562	7.5	0.25			11.571	11.699	-0.128		11.687	11.909	-0.222		11.312	10.312	7.25	11.712	10.34	7.637		11.562	10.312	8.187	11.709	10.444	8.037		11.625	10	7.5	11.708	10.351	7.682		11.687	11.937	11.75	11.82	11.907	11.921
11.571	7.562	0	0	0		7.562	7.375	7.562	7.5	0.187			11.571	11.698	-0.127		11.687	11.909	-0.222		11.312	10.312	7.25	11.711	10.339	7.636		11.562	10.312	8.187	11.708	10.443	8.035		11.625	10	7.5	11.707	10.35	7.68		11.75	11.937	11.687	11.819	11.907	11.921
11.5621	7.625	0	0	0		7.625	7.375	7.562	7.5	0.25			11.5621	11.698	-0.135857		11.687	11.909	-0.222		11.312	10.312	7.25	11.711	10.338	7.634		11.562	10.312	8.187	11.708	10.442	8.033		11.625	9.937	7.5	11.707	10.349	7.679		11.687	11.937	11.687	11.819	11.907	11.921
11.571	7.625	0	0	0		7.625	7.375	7.562	7.5	0.25			11.571	11.697	-0.126		11.687	11.909	-0.222		11.312	10.312	7.25	11.71	10.337	7.633		11.562	10.312	8.187	11.707	10.442	8.031		11.625	10	7.5	11.706	10.348	7.677		11.687	11.937	11.75	11.818	11.906	11.921
11.571	7.625	0	0	0		7.625	7.375	7.562	7.5	0.25			11.571	11.697	-0.126		11.687	11.909	-0.222		11.312	10.312	7.25	11.71	10.336	7.631		11.562	10.312	8.187	11.707	10.441	8.029		11.625	9.937	7.5	11.706	10.347	7.676		11.687	11.937	11.687	11.818	11.906	11.92
11.571	7.562	0	0	0		7.562	7.375	7.625	7.5	0.25			11.571	11.696	-0.125		11.687	11.909	-0.222		11.312	10.312	7.25	11.709	10.335	7.63		11.562	10.312	8.187	11.706	10.44	8.027		11.625	10	7.5	11.705	10.346	7.674		11.687	11.937	11.687	11.817	11.906	11.92
11.571	7.562	0	0	0		7.562	7.375	7.625	7.5	0.25			11.571	11.695	-0.124		11.687	11.908	-0.221		11.312	10.312	7.25	11.709	10.334	7.628		11.562	10.312	8.187	11.706	10.439	8.026		11.625	9.937	7.5	11.705	10.345	7.672		11.687	11.937	11.687	11.817	11.906	11.92
11.571	7.562	0	0	0		7.562	7.375	7.562	7.5	0.187			11.571	11.695	-0.124		11.687	11.908	-0.221		11.312	10.312	7.25	11.708	10.334	7.627		11.562	10.312	8.187	11.705	10.438	8.024		11.625	10	7.5	11.704	10.344	7.671		11.75	11.937	11.687	11.816	11.905	11.92
11.571	7.562	0	0	0		7.562	7.375	7.562	7.437	0.187			11.571	11.694	-0.123		11.687	11.908	-0.221		11.312	10.312	7.25	11.708	10.333	7.625		11.562	10.312	8.187	11.705	10.437	8.022		11.625	10	7.5	11.704	10.343	7.669		11.687	11.937	11.687	11.816	11.905	11.92
11.571	7.562	0	0	0		7.562	7.375	7.562	7.437	0.187			11.571	11.694	-0.123		11.687	11.908	-0.221		11.312	10.312	7.25	11.707	10.332	7.623		11.562	10.312	8.187	11.704	10.437	8.02		11.625	10	7.5	11.703	10.342	7.667		11.687	11.937	11.687	11.815	11.905	11.92
11.571	7.562	0	0	0		7.562	7.375	7.562	7.437	0.187			11.571	11.693	-0.122		11.687	11.908	-0.221		11.312	10.312	7.25	11.707	10.331	7.622		11.562	10.312	8.187	11.704	10.436	8.018		11.625	10	7.5	11.703	10.342	7.666		11.687	11.937	11.687	11.815	11.905	11.92
11.571	7.562	0	0	0		7.562	7.375	7.562	7.437	0.187			11.571	11.693	-0.122		11.687	11.908	-0.221		11.312	10.312	7.25	11.706	10.33	7.62		11.562	10.312	8.125	11.703	10.435	8.016		11.625	10	7.437	11.702	10.341	7.664		11.687	11.937	11.687	11.815	11.904	11.92
11.571	7.562	0	0	0		7.562	7.375	7.562	7.437	0.187			11.571	11.692	-0.121		11.687	11.907	-0.22		11.312	10.312	7.187	11.705	10.329	7.619		11.562	10.312	8.187	11.703	10.434	8.014		11.625	9.937	7.437	11.702	10.34	7.663		11.687	11.937	11.687	11.814	11.904	11.92
11.571	7.562	0	0	0		7.562	7.375	7.562	7.437	0.187			11.571	11.692	-0.121		11.687	11.907	-0.22		11.312	10.312	7.187	11.705	10.328	7.617		11.562	10.312	8.125	11.702	10.433	8.012		11.625	9.937	7.437	11.701	10.339	7.661		11.687	11.937	11.687	11.814	11.904	11.92
11.571	7.562	0	0	0		7.562	7.375	7.562	7.437	0.187			11.571	11.691	-0.12		11.687	11.907	-0.22		11.312	10.312	7.187	11.704	10.327	7.616		11.562	10.312	8.125	11.701	10.433	8.011		11.625	9.937	7.437	11.7	10.338	7.659		11.687	11.937	11.687	11.813	11.904	11.919
11.571	7.562	0	0	0		7.562	7.375	7.562	7.437	0.187			11.571	11.691	-0.12		11.687	11.907	-0.22		11.312	10.312	7.187	11.704	10.326	7.614		11.562	10.312	8.125	11.701	10.432	8.009		11.625	9.937	7.437	11.7	10.337	7.658		11.687	11.937	11.687	11.813	11.903	11.919
11.58	7.562	0	0	0		7.562	7.375	7.562	7.437	0.187			11.58	11.69	-0.11		11.687	11.907	-0.22		11.312	10.312	7.187	11.703	10.325	7.613		11.562	10.312	8.125	11.7	10.431	8.007		11.625	9.937	7.437	11.699	10.336	7.656		11.75	11.937	11.687	11.812	11.903	11.919
11.5621	7.562	0	0	0		7.562	7.375	7.562	7.437	0.187			11.5621	11.689	-0.126857		11.687	11.907	-0.22		11.312	10.312	7.187	11.703	10.324	7.611		11.562	10.312	8.125	11.7	10.43	8.005		11.625	9.937	7.437	11.699	10.335	7.655		11.687	11.937	11.687	11.812	11.903	11.919
11.571	7.562	0	0	0		7.562	7.375	7.5	7.437	0.187			11.571	11.689	-0.118		11.687	11.907	-0.22		11.312	10.312	7.187	11.702	10.323	7.61		11.562	10.312	8.125	11.699	10.429	8.003		11.625	9.937	7.437	11.698	10.334	7.653		11.687	11.937	11.687	11.811	11.903	11.919
11.571	7.562	0	0	0		7.562	7.375	7.5	7.437	0.187			11.571	11.688	-0.117		11.687	11.906	-0.219		11.312	10.312	7.187	11.702	10.322	7.608		11.562	10.312	8.125	11.699	10.428	8.001		11.625	9.937	7.437	11.698	10.333	7.651		11.687	11.937	11.687	11.811	11.902	11.919
11.571	7.5	0	0	0		7.5	7.375	7.5	7.375	0.125			11.571	11.688	-0.117		11.687	11.906	-0.219		11.312	10.312	7.187	11.701	10.321	7.607		11.562	10.312	8.125	11.698	10.428	7.999		11.625	9.937	7.437	11.697	10.332	7.65		11.687	11.937	11.687	11.81	11.902	11.919
11.571	7.562	0	0	0		7.562	7.375	7.5	7.437	0.187			11.571	11.687	-0.116		11.687	11.906	-0.219		11.312	10.312	7.187	11.701	10.32	7.605		11.562	10.312	8.125	11.698	10.427	7.997		11.625	9.937	7.437	11.697	10.331	7.648		11.687	11.937	11.687	11.81	11.902	11.919
11.571	7.562	0	0	0		7.562	7.375	7.5	7.437	0.187			11.571	11.687	-0.116		11.687	11.906	-0.219		11.312	10.312	7.187	11.7	10.319	7.603		11.562	10.312	8.125	11.697	10.426	7.996		11.625	9.937	7.437	11.696	10.33	7.647		11.687	11.937	11.687	11.809	11.902	11.919
11.571	7.562	0	0	0		7.562	7.375	7.5	7.437	0.187			11.571	11.686	-0.115		11.687	11.906	-0.219		11.312	10.312	7.187	11.7	10.318	7.602		11.562	10.312	8.125	11.697	10.425	7.994		11.625	9.937	7.437	11.696	10.329	7.645		11.687	11.937	11.687	11.809	11.901	11.919
11.571	7.5	0	0	0		7.5	7.375	7.5	7.375	0.125			11.571	11.686	-0.115		11.687	11.906	-0.219		11.312	10.312	7.187	11.699	10.317	7.6		11.562	10.312	8.125	11.696	10.424	7.992		11.625	9.937	7.437	11.695	10.329	7.643		11.687	11.937	11.687	11.808	11.901	11.918
11.5621	7.5	0	0	0		7.5	7.375	7.5	7.375	0.125			11.5621	11.685	-0.122857		11.687	11.905	-0.218		11.312	10.312	7.187	11.699	10.317	7.599		11.562	10.312	8.125	11.696	10.423	7.99		11.625	9.937	7.437	11.695	10.328	7.642		11.687	11.937	11.687	11.808	11.901	11.918
11.571	7.5	0	0	0		7.5	7.312	7.5	7.375	0.188			11.571	11.685	-0.114		11.687	11.905	-0.218		11.312	10.25	7.187	11.698	10.316	7.597		11.562	10.312	8.125	11.695	10.423	7.988		11.625	9.937	7.437	11.694	10.327	7.64		11.687	11.937	11.687	11.807	11.901	11.918
11.58	7.5	0	0	0		7.5	7.312	7.5	7.375	0.188			11.58	11.684	-0.104		11.687	11.905	-0.218		11.312	10.25	7.187	11.698	10.315	7.596		11.562	10.312	8.125	11.695	10.422	7.986		11.625	9.937	7.437	11.694	10.326	7.639		11.687	11.937	11.687	11.807	11.901	11.918
11.5621	7.5	0	0	0		7.5	7.312	7.5	7.375	0.188			11.5621	11.683	-0.120857		11.687	11.905	-0.218		11.312	10.25	7.187	11.697	10.314	7.594		11.562	10.312	8.125	11.694	10.421	7.984		11.625	9.937	7.375	11.693	10.325	7.637		11.687	11.937	11.687	11.806	11.9	11.918
11.571	7.5	0	0	0		7.5	7.312	7.5	7.375	0.188			11.571	11.683	-0.112		11.687	11.905	-0.218		11.312	10.312	7.187	11.696	10.313	7.593		11.562	10.312	8.125	11.694	10.42	7.982		11.625	9.937	7.437	11.692	10.324	7.635		11.687	11.937	11.687	11.806	11.9	11.918
11.5621	7.562	0	0	0		7.562	7.312	7.5	7.375	0.25			11.5621	11.682	-0.119857		11.687	11.905	-0.218		11.312	10.25	7.187	11.696	10.312	7.591		11.562	10.312	8.125	11.693	10.419	7.98		11.625	9.937	7.375	11.692	10.323	7.634		11.687	11.937	11.687	11.805	11.9	11.918
11.571	7.5	0	0	0		7.5	7.312	7.5	7.375	0.188			11.571	11.682	-0.111		11.687	11.904	-0.217		11.312	10.25	7.187	11.695	10.311	7.59		11.562	10.312	8.125	11.693	10.419	7.979		11.625	9.937	7.375	11.691	10.322	7.632		11.687	11.937	11.687	11.805	11.9	11.918
11.571	7.5	0	0	0		7.5	7.312	7.5	7.375	0.188			11.571	11.681	-0.11		11.687	11.904	-0.217		11.312	10.25	7.187	11.695	10.31	7.588		11.562	10.312	8.125	11.692	10.418	7.977		11.625	9.937	7.375	11.691	10.321	7.63		11.687	11.937	11.687	11.804	11.899	11.918
11.571	7.5	0	0	0		7.5	7.312	7.437	7.375	0.188			11.571	11.681	-0.11		11.687	11.904	-0.217		11.312	10.25	7.187	11.694	10.309	7.586		11.562	10.312	8.125	11.691	10.417	7.975		11.625	9.937	7.375	11.69	10.32	7.629		11.687	11.937	11.687	11.804	11.899	11.918
11.5621	7.5	0	0	0		7.5	7.312	7.437	7.375	0.188			11.5621	11.68	-0.117857		11.687	11.904	-0.217		11.375	10.25	7.125	11.694	10.308	7.585		11.562	10.312	8.125	11.691	10.416	7.973		11.625	9.937	7.375	11.69	10.319	7.627		11.687	11.937	11.687	11.803	11.899	11.917
11.571	7.5	0	0	0		7.5	7.312	7.437	7.375	0.188			11.571	11.68	-0.109		11.687	11.904	-0.217		11.312	10.25	7.187	11.693	10.307	7.583		11.562	10.312	8.125	11.69	10.415	7.971		11.625	9.937	7.375	11.689	10.318	7.626		11.687	11.937	11.687	11.803	11.899	11.917
11.571	7.437	0	0	0		7.437	7.25	7.437	7.375	0.187			11.571	11.679	-0.108		11.687	11.904	-0.217		11.312	10.25	7.125	11.693	10.306	7.582		11.562	10.312	8.125	11.69	10.414	7.969		11.625	9.937	7.375	11.689	10.317	7.624		11.75	11.937	11.687	11.803	11.898	11.917
11.571	7.437	0	0	0		7.437	7.312	7.437	7.375	0.125			11.571	11.678	-0.107		11.687	11.903	-0.216		11.312	10.25	7.125	11.692	10.305	7.58		11.562	10.312	8.125	11.689	10.414	7.967		11.625	9.937	7.375	11.688	10.316	7.622		11.687	11.937	11.687	11.802	11.898	11.917
11.5621	7.437	0	0	0		7.437	7.25	7.437	7.375	0.187			11.5621	11.678	-0.115857		11.687	11.903	-0.216		11.312	10.25	7.187	11.692	10.304	7.579		11.562	10.312	8.062	11.689	10.413	7.965		11.625	9.937	7.375	11.688	10.316	7.621		11.687	11.937	11.687	11.802	11.898	11.917
11.571	7.437	0	0	0		7.437	7.312	7.437	7.375	0.125			11.571	11.677	-0.106		11.687	11.903	-0.216		11.312	10.25	7.125	11.691	10.303	7.577		11.562	10.312	8.062	11.688	10.412	7.964		11.625	9.937	7.375	11.687	10.315	7.619		11.687	11.937	11.687	11.801	11.898	11.917
11.571	7.437	0	0	0		7.437	7.312	7.437	7.375	0.125			11.571	11.677	-0.106		11.687	11.903	-0.216		11.312	10.25	7.125	11.691	10.302	7.576		11.562	10.312	8.062	11.688	10.411	7.962		11.625	9.937	7.375	11.687	10.314	7.618		11.687	11.937	11.687	11.801	11.897	11.917
11.5621	7.437	0	0	0		7.437	7.25	7.437	7.375	0.187			11.5621	11.676	-0.113857		11.687	11.903	-0.216		11.312	10.25	7.125	11.69	10.301	7.574		11.562	10.312	8.062	11.687	10.41	7.96		11.625	9.937	7.375	11.686	10.313	7.616		11.687	11.937	11.687	11.8	11.897	11.917
11.571	7.437	0	0	0		7.437	7.25	7.437	7.375	0.187			11.571	11.676	-0.105		11.687	11.903	-0.216		11.312	10.25	7.125	11.69	10.301	7.573		11.562	10.312	8.062	11.687	10.41	7.958		11.625	9.937	7.375	11.686	10.312	7.614		11.687	11.937	11.687	11.8	11.897	11.917
11.571	7.5	0	0	0		7.5	7.25	7.437	7.375	0.25			11.571	11.675	-0.104		11.687	11.902	-0.215		11.312	10.25	7.125	11.689	10.3	7.571		11.562	10.312	8.062	11.686	10.409	7.956		11.625	9.937	7.375	11.685	10.311	7.613		11.687	11.937	11.687	11.799	11.897	11.917
11.571	7.5	0	0	0		7.5	7.312	7.437	7.375	0.188			11.571	11.675	-0.104		11.687	11.902	-0.215		11.312	10.25	7.125	11.689	10.299	7.57		11.562	10.312	8.062	11.686	10.408	7.954		11.625	9.937	7.375	11.685	10.31	7.611		11.687	11.937	11.687	11.799	11.896	11.916
11.571	7.5	0	0	0		7.5	7.312	7.437	7.375	0.188			11.571	11.674	-0.103		11.687	11.902	-0.215		11.312	10.25	7.125	11.688	10.298	7.568		11.562	10.312	8.062	11.685	10.407	7.952		11.625	9.937	7.375	11.684	10.309	7.61		11.687	11.937	11.687	11.798	11.896	11.916
11.571	7.5	0	0	0		7.5	7.312	7.437	7.375	0.188			11.571	11.673	-0.102		11.687	11.902	-0.215		11.312	10.25	7.125	11.687	10.297	7.566		11.562	10.312	8.062	11.685	10.406	7.95		11.562	9.937	7.375	11.683	10.308	7.608		11.687	11.937	11.687	11.798	11.896	11.916
11.571	7.5	0	0	0		7.5	7.312	7.437	7.375	0.188			11.571	11.673	-0.102		11.687	11.902	-0.215		11.312	10.25	7.125	11.687	10.296	7.565		11.562	10.312	8.062	11.684	10.405	7.948		11.625	9.937	7.375	11.683	10.307	7.606		11.687	11.937	11.687	11.797	11.896	11.916
11.5621	7.5	0	0	0		7.5	7.312	7.437	7.375	0.188			11.5621	11.672	-0.109857		11.687	11.902	-0.215		11.312	10.25	7.125	11.686	10.295	7.563		11.562	10.312	8.062	11.684	10.405	7.947		11.625	9.937	7.375	11.682	10.306	7.605		11.687	11.937	11.687	11.797	11.895	11.916
11.571	7.5	0	0	0		7.5	7.25	7.437	7.375	0.25			11.571	11.672	-0.101		11.687	11.902	-0.215		11.312	10.25	7.125	11.686	10.294	7.562		11.562	10.312	8.062	11.683	10.404	7.945		11.625	9.937	7.375	11.682	10.305	7.603		11.687	11.937	11.687	11.796	11.895	11.916
11.571	7.5	0	0	0		7.5	7.25	7.437	7.312	0.25			11.571	11.671	-0.1		11.625	11.901	-0.276		11.312	10.25	7.125	11.685	10.293	7.56		11.562	10.312	8.062	11.682	10.403	7.943		11.625	9.937	7.375	11.681	10.304	7.602		11.75	11.937	11.687	11.796	11.895	11.916
11.571	7.5	0	0	0		7.5	7.25	7.437	7.312	0.25			11.571	11.671	-0.1		11.687	11.901	-0.214		11.312	10.25	7.125	11.685	10.292	7.559		11.562	10.312	8.062	11.682	10.402	7.941		11.625	9.937	7.375	11.681	10.303	7.6		11.75	11.937	11.687	11.795	11.895	11.916
11.571	7.5	0	0	0		7.5	7.25	7.437	7.312	0.25			11.571	11.67	-0.099		11.687	11.901	-0.214		11.312	10.25	7.125	11.684	10.291	7.557		11.562	10.312	8.062	11.681	10.401	7.939		11.625	9.937	7.375	11.68	10.302	7.598		11.687	11.937	11.687	11.795	11.894	11.916
11.58	7.5	0	0	0		7.5	7.312	7.437	7.312	0.188			11.58	11.67	-0.09		11.687	11.901	-0.214		11.312	10.25	7.125	11.684	10.29	7.556		11.562	10.312	8.062	11.681	10.4	7.937		11.625	9.937	7.375	11.68	10.302	7.597		11.687	11.937	11.687	11.794	11.894	11.916
11.5621	7.5	0	0	0		7.5	7.312	7.437	7.312	0.188			11.5621	11.669	-0.106857		11.687	11.901	-0.214		11.312	10.25	7.125	11.683	10.289	7.554		11.562	10.312	8.062	11.68	10.4	7.935		11.625	9.937	7.375	11.679	10.301	7.595		11.687	11.937	11.687	11.794	11.894	11.915
11.571	7.5	0	0	0		7.5	7.312	7.437	7.312	0.188			11.571	11.669	-0.098		11.687	11.901	-0.214		11.312	10.25	7.125	11.683	10.288	7.553		11.562	10.312	8.062	11.68	10.399	7.933		11.625	9.937	7.375	11.679	10.3	7.593		11.75	11.937	11.687	11.793	11.894	11.915
11.571	7.5	0	0	0		7.5	7.312	7.437	7.312	0.188			11.571	11.668	-0.097		11.687	11.9	-0.213		11.312	10.25	7.125	11.682	10.287	7.551		11.562	10.312	8.062	11.679	10.398	7.932		11.625	9.937	7.375	11.678	10.299	7.592		11.687	11.937	11.687	11.793	11.893	11.915
11.5621	7.5	0	0	0		7.5	7.312	7.437	7.312	0.188			11.5621	11.667	-0.104857		11.625	11.9	-0.275		11.312	10.25	7.125	11.682	10.286	7.549		11.562	10.312	8.062	11.679	10.397	7.93		11.625	9.937	7.375	11.678	10.298	7.59		11.687	11.937	11.687	11.792	11.893	11.915
11.571	7.5	0	0	0		7.5	7.312	7.437	7.312	0.188			11.571	11.667	-0.096		11.687	11.9	-0.213		11.312	10.25	7.125	11.681	10.285	7.548		11.562	10.312	8.062	11.678	10.396	7.928		11.625	9.937	7.375	11.677	10.297	7.589		11.687	11.937	11.687	11.792	11.893	11.915
11.5621	7.5	0	0	0		7.5	7.312	7.437	7.312	0.188			11.5621	11.666	-0.103857		11.687	11.9	-0.213		11.312	10.25	7.125	11.681	10.285	7.546		11.562	10.312	8.062	11.678	10.396	7.926		11.625	9.937	7.375	11.677	10.296	7.587		11.687	11.937	11.687	11.791	11.893	11.915
11.5621	7.5	0	0	0		7.5	7.312	7.5	7.312	0.188			11.5621	11.666	-0.103857		11.687	11.9	-0.213		11.312	10.25	7.125	11.68	10.284	7.545		11.562	10.312	8.062	11.677	10.395	7.924		11.625	9.937	7.375	11.676	10.295	7.585		11.75	11.937	11.687	11.791	11.893	11.915
11.5621	7.5	0	0	0		7.5	7.312	7.5	7.312	0.188			11.5621	11.665	-0.102857		11.687	11.9	-0.213		11.312	10.25	7.125	11.68	10.283	7.543		11.562	10.312	8.062	11.677	10.394	7.922		11.625	9.937	7.375	11.675	10.294	7.584		11.687	11.937	11.687	11.791	11.892	11.915
11.5621	7.5	0	0	0		7.5	7.312	7.5	7.312	0.188			11.5621	11.665	-0.102857		11.687	11.899	-0.212		11.312	10.25	7.125	11.679	10.282	7.542		11.562	10.312	8.062	11.676	10.393	7.92		11.625	9.937	7.375	11.675	10.293	7.582		11.687	11.937	11.687	11.79	11.892	11.915
11.571	7.562	0	0	0		7.562	7.312	7.5	7.312	0.25			11.571	11.664	-0.093		11.687	11.899	-0.212		11.312	10.25	7.125	11.678	10.281	7.54		11.562	10.312	8.062	11.676	10.392	7.918		11.625	9.937	7.375	11.674	10.292	7.581		11.687	11.937	11.687	11.79	11.892	11.915
11.5621	7.562	0	0	0		7.562	7.312	7.5	7.375	0.25			11.5621	11.664	-0.101857		11.625	11.899	-0.274		11.312	10.25	7.125	11.678	10.28	7.539		11.562	10.312	8	11.675	10.391	7.916		11.562	9.937	7.375	11.674	10.291	7.579		11.687	11.937	11.687	11.789	11.892	11.914
11.5621	7.562	0	0	0		7.562	7.312	7.5	7.312	0.25			11.5621	11.663	-0.100857		11.687	11.899	-0.212		11.312	10.25	7.125	11.677	10.279	7.537		11.562	10.25	8.062	11.675	10.391	7.915		11.562	9.937	7.375	11.673	10.29	7.577		11.687	11.937	11.687	11.789	11.891	11.914
11.571	7.5	0	0	0		7.5	7.312	7.5	7.312	0.188			11.571	11.662	-0.091		11.687	11.899	-0.212		11.312	10.25	7.125	11.677	10.278	7.536		11.562	10.25	8	11.674	10.39	7.913		11.625	9.937	7.375	11.673	10.289	7.576		11.687	11.937	11.687	11.788	11.891	11.914
11.5621	7.5	0	0	0		7.5	7.312	7.5	7.312	0.188			11.5621	11.662	-0.0998571		11.687	11.899	-0.212		11.312	10.25	7.125	11.676	10.277	7.534		11.562	10.312	8	11.674	10.389	7.911		11.625	9.937	7.375	11.672	10.289	7.574		11.687	11.937	11.687	11.788	11.891	11.914
11.5621	7.5	0	0	0		7.5	7.312	7.5	7.312	0.188			11.5621	11.661	-0.0988571		11.687	11.898	-0.211		11.312	10.25	7.125	11.676	10.276	7.533		11.562	10.312	8	11.673	10.388	7.909		11.625	9.937	7.375	11.672	10.288	7.573		11.687	11.937	11.687	11.787	11.891	11.914
11.571	7.562	0	0	0		7.562	7.312	7.5	7.312	0.25			11.571	11.661	-0.09		11.687	11.898	-0.211		11.312	10.25	7.062	11.675	10.275	7.531		11.562	10.25	8	11.672	10.387	7.907		11.625	9.937	7.375	11.671	10.287	7.571		11.687	11.937	11.687	11.787	11.89	11.914
11.5621	7.562	0	0	0		7.562	7.312	7.562	7.375	0.25			11.5621	11.66	-0.0978571		11.625	11.898	-0.273		11.312	10.25	7.125	11.675	10.274	7.529		11.562	10.25	8	11.672	10.387	7.905		11.625	9.937	7.375	11.671	10.286	7.569		11.687	11.937	11.687	11.786	11.89	11.914
11.5621	7.562	0	0	0		7.562	7.312	7.5	7.375	0.25			11.5621	11.66	-0.0978571		11.625	11.898	-0.273		11.312	10.25	7.062	11.674	10.273	7.528		11.562	10.312	8	11.671	10.386	7.903		11.625	9.937	7.375	11.67	10.285	7.568		11.687	11.937	11.687	11.786	11.89	11.914
11.571	7.562	0	0	0		7.562	7.312	7.562	7.375	0.25			11.571	11.659	-0.088		11.625	11.898	-0.273		11.312	10.25	7.062	11.674	10.272	7.526		11.562	10.25	8	11.671	10.385	7.901		11.625	9.937	7.375	11.67	10.284	7.566		11.687	11.937	11.687	11.785	11.89	11.914
11.571	7.5	0	0	0		7.5	7.312	7.5	7.375	0.188			11.571	11.659	-0.088		11.625	11.898	-0.273		11.312	10.25	7.062	11.673	10.271	7.525		11.562	10.312	8	11.67	10.384	7.9		11.625	9.937	7.375	11.669	10.283	7.565		11.687	11.937	11.687	11.785	11.889	11.914
11.571	7.5	0	0	0		7.5	7.312	7.562	7.312	0.25			11.571	11.658	-0.087		11.625	11.898	-0.273		11.312	10.25	7.062	11.673	10.27	7.523		11.562	10.312	8	11.67	10.383	7.898		11.562	9.937	7.375	11.669	10.282	7.563		11.687	11.937	11.687	11.784	11.889	11.913
11.5621	7.5	0	0	0		7.5	7.25	7.562	7.312	0.312			11.5621	11.658	-0.0958571		11.625	11.897	-0.272		11.312	10.25	7.062	11.672	10.269	7.522		11.562	10.312	8	11.669	10.382	7.896		11.625	9.937	7.375	11.668	10.281	7.561		11.687	11.937	11.687	11.784	11.889	11.913
11.5621	7.5	0	0	0		7.5	7.25	7.562	7.312	0.312			11.5621	11.657	-0.0948571		11.687	11.897	-0.21		11.312	10.25	7.062	11.672	10.268	7.52		11.562	10.312	8	11.669	10.382	7.894		11.625	9.937	7.375	11.667	10.28	7.56		11.75	11.937	11.687	11.783	11.889	11.913
11.5621	7.562	0	0	0		7.562	7.312	7.562	7.312	0.25			11.5621	11.656	-0.0938571		11.625	11.897	-0.272		11.312	10.25	7.062	11.671	10.268	7.519		11.562	10.312	8	11.668	10.381	7.892		11.562	9.875	7.375	11.667	10.279	7.558		11.687	11.937	11.687	11.783	11.888	11.913
11.571	7.562	0	0	0		7.562	7.312	7.562	7.312	0.25			11.571	11.656	-0.085		11.687	11.897	-0.21		11.312	10.25	7.062	11.671	10.267	7.517		11.562	10.312	8	11.668	10.38	7.89		11.562	9.937	7.375	11.666	10.278	7.556		11.687	11.937	11.687	11.782	11.888	11.913
11.5621	7.562	0	0	0		7.562	7.312	7.562	7.312	0.25			11.5621	11.655	-0.0928571		11.625	11.897	-0.272		11.312	10.25	7.062	11.67	10.266	7.516		11.562	10.25	8	11.667	10.379	7.888		11.562	9.937	7.375	11.666	10.277	7.555		11.687	11.937	11.687	11.782	11.888	11.913
11.5621	7.562	0	0	0		7.562	7.375	7.562	7.312	0.25			11.5621	11.655	-0.0928571		11.687	11.897	-0.21		11.312	10.25	7.062	11.669	10.265	7.514		11.562	10.25	8	11.667	10.378	7.886		11.625	9.937	7.375	11.665	10.276	7.553		11.687	11.937	11.687	11.781	11.888	11.913
11.5621	7.562	0	0	0		7.562	7.375	7.5	7.312	0.25			11.5621	11.654	-0.0918571		11.625	11.896	-0.271		11.312	10.25	7.062	11.669	10.264	7.513		11.562	10.312	8	11.666	10.377	7.885		11.625	9.937	7.375	11.665	10.276	7.552		11.687	11.937	11.687	11.781	11.887	11.913
11.5621	7.562	0	0	0		7.562	7.312	7.5	7.312	0.25			11.5621	11.654	-0.0918571		11.625	11.896	-0.271		11.312	10.25	7.062	11.668	10.263	7.511		11.562	10.25	8	11.666	10.377	7.883		11.562	9.875	7.375	11.664	10.275	7.55		11.75	11.937	11.687	11.78	11.887	11.913
11.5621	7.625	0	0	0		7.625	7.312	7.5	7.312	0.313			11.5621	11.653	-0.0908571		11.625	11.896	-0.271		11.312	10.25	7.062	11.668	10.262	7.509		11.562	10.25	8	11.665	10.376	7.881		11.625	9.937	7.375	11.664	10.274	7.548		11.687	11.937	11.687	11.78	11.887	11.913
11.5621	7.562	0	0	0		7.562	7.312	7.5	7.312	0.25			11.5621	11.653	-0.0908571		11.625	11.896	-0.271		11.312	10.25	7.062	11.667	10.261	7.508		11.562	10.25	8	11.665	10.375	7.879		11.625	9.937	7.375	11.663	10.273	7.547		11.687	11.937	11.687	11.779	11.887	11.912
11.571	7.562	0	0	0		7.562	7.312	7.5	7.312	0.25			11.571	11.652	-0.081		11.625	11.896	-0.271		11.312	10.25	7.062	11.667	10.26	7.506		11.562	10.25	8	11.664	10.374	7.877		11.625	9.875	7.375	11.663	10.272	7.545		11.687	11.937	11.687	11.779	11.886	11.912
11.5621	7.562	0	0	0		7.562	7.312	7.5	7.312	0.25			11.5621	11.651	-0.0888571		11.687	11.896	-0.209		11.312	10.187	7	11.666	10.259	7.505		11.562	10.25	8	11.664	10.373	7.875		11.625	9.875	7.375	11.662	10.271	7.544		11.687	11.937	11.687	11.779	11.886	11.912
11.5621	7.5	0	0	0		7.5	7.25	7.5	7.25	0.25			11.5621	11.651	-0.0888571		11.687	11.895	-0.208		11.312	10.187	7.062	11.666	10.258	7.503		11.562	10.25	8	11.663	10.373	7.873		11.625	9.875	7.375	11.662	10.27	7.542		11.687	11.937	11.687	11.778	11.886	11.912
11.571	7.5	0	0	0		7.5	7.25	7.5	7.25	0.25			11.571	11.65	-0.079		11.625	11.895	-0.27		11.312	10.25	7	11.665	10.257	7.502		11.562	10.25	8	11.662	10.372	7.871		11.562	9.875	7.375	11.661	10.269	7.54		11.687	11.937	11.687	11.778	11.886	11.912
11.571	7.5	0	0	0		7.5	7.25	7.437	7.25	0.25			11.571	11.65	-0.079		11.625	11.895	-0.27		11.312	10.25	7	11.665	10.256	7.5		11.562	10.25	8	11.662	10.371	7.87		11.625	9.875	7.375	11.661	10.268	7.539		11.687	11.937	11.687	11.777	11.885	11.912
11.5621	7.5	0	0	0		7.5	7.25	7.437	7.25	0.25			11.5621	11.649	-0.0868571		11.625	11.895	-0.27		11.312	10.25	7	11.664	10.255	7.499		11.562	10.25	8	11.661	10.37	7.868		11.625	9.937	7.375	11.66	10.267	7.537		11.687	11.937	11.687	11.777	11.885	11.912
11.5621	7.437	0	0	0		7.437	7.25	7.437	7.25	0.187			11.5621	11.649	-0.0868571		11.625	11.895	-0.27		11.312	10.25	7	11.664	10.254	7.497		11.562	10.25	8	11.661	10.369	7.866		11.625	9.875	7.375	11.66	10.266	7.536		11.687	11.937	11.687	11.776	11.885	11.912
11.5533	7.5	0	0	0		7.5	7.312	7.437	7.25	0.25			11.5533	11.648	-0.0947143		11.625	11.895	-0.27		11.312	10.25	7	11.663	10.253	7.496		11.562	10.25	8	11.66	10.368	7.864		11.625	9.875	7.375	11.659	10.265	7.534		11.687	11.937	11.687	11.776	11.885	11.912
11.5621	7.437	0	0	0		7.437	7.25	7.437	7.25	0.187			11.5621	11.648	-0.0858571		11.625	11.894	-0.269		11.312	10.187	7	11.663	10.252	7.494		11.562	10.25	8	11.66	10.368	7.862		11.625	9.875	7.375	11.658	10.264	7.532		11.75	11.937	11.687	11.775	11.885	11.912
11.5621	7.437	0	0	0		7.437	7.25	7.437	7.25	0.187			11.5621	11.647	-0.0848571		11.625	11.894	-0.269		11.312	10.187	7	11.662	10.252	7.493		11.562	10.25	8	11.659	10.367	7.86		11.625	9.875	7.312	11.658	10.263	7.531		11.687	11.937	11.687	11.775	11.884	11.911
11.5621	7.437	0	0	0		7.437	7.25	7.375	7.25	0.187			11.5621	11.647	-0.0848571		11.625	11.894	-0.269		11.312	10.25	7	11.662	10.251	7.491		11.562	10.25	7.937	11.659	10.366	7.858		11.562	9.875	7.312	11.657	10.262	7.529		11.687	11.937	11.687	11.774	11.884	11.911
11.5621	7.437	0	0	0		7.437	7.25	7.375	7.25	0.187			11.5621	11.646	-0.0838571		11.625	11.894	-0.269		11.312	10.187	7	11.661	10.25	7.489		11.562	10.25	7.937	11.658	10.365	7.856		11.625	9.875	7.312	11.657	10.262	7.528		11.687	11.937	11.687	11.774	11.884	11.911
11.5621	7.437	0	0	0		7.437	7.25	7.375	7.25	0.187			11.5621	11.645	-0.0828571		11.625	11.894	-0.269		11.312	10.187	7	11.66	10.249	7.488		11.562	10.25	7.937	11.658	10.364	7.854		11.625	9.875	7.312	11.656	10.261	7.526		11.687	11.937	11.687	11.773	11.884	11.911
11.5621	7.375	0	0	0		7.375	7.187	7.375	7.25	0.188			11.5621	11.645	-0.0828571		11.625	11.894	-0.269		11.312	10.187	7	11.66	10.248	7.486		11.562	10.25	7.937	11.657	10.364	7.853		11.562	9.875	7.312	11.656	10.26	7.524		11.687	11.937	11.687	11.773	11.883	11.911
11.5621	7.437	0	0	0		7.437	7.25	7.375	7.25	0.187			11.5621	11.644	-0.0818571		11.625	11.894	-0.269		11.312	10.187	7	11.659	10.247	7.485		11.562	10.25	7.937	11.657	10.363	7.851		11.625	9.875	7.312	11.655	10.259	7.523		11.687	11.937	11.687	11.772	11.883	11.911
11.5621	7.437	0	0	0		7.437	7.25	7.375	7.25	0.187			11.5621	11.644	-0.0818571		11.625	11.893	-0.268		11.312	10.187	7	11.659	10.246	7.483		11.562	10.25	8	11.656	10.362	7.849		11.625	9.875	7.312	11.655	10.258	7.521		11.687	11.937	11.687	11.772	11.883	11.911
11.5711	7.437	0	0	0		7.437	7.25	7.375	7.25	0.187			11.5711	11.643	-0.0718571		11.625	11.893	-0.268		11.312	10.187	7	11.658	10.245	7.482		11.562	10.25	7.937	11.656	10.361	7.847		11.562	9.875	7.312	11.654	10.257	7.519		11.687	11.937	11.687	11.771	11.883	11.911
11.5621	7.437	0	0	0		7.437	7.25	7.375	7.25	0.187			11.5621	11.643	-0.0808571		11.625	11.893	-0.268		11.312	10.187	7	11.658	10.244	7.48		11.562	10.25	7.937	11.655	10.36	7.845		11.562	9.875	7.312	11.654	10.256	7.518		11.687	11.937	11.687	11.771	11.882	11.911
11.5621	7.437	0	0	0		7.437	7.187	7.375	7.25	0.25			11.5621	11.642	-0.0798571		11.625	11.893	-0.268		11.312	10.187	7	11.657	10.243	7.479		11.562	10.25	7.937	11.655	10.359	7.843		11.625	9.875	7.312	11.653	10.255	7.516		11.75	11.937	11.687	11.77	11.882	11.911
11.5621	7.437	0	0	0		7.437	7.187	7.375	7.25	0.25			11.5621	11.642	-0.0798571		11.625	11.893	-0.268		11.312	10.187	7	11.657	10.242	7.477		11.562	10.25	7.937	11.654	10.359	7.841		11.562	9.875	7.312	11.653	10.254	7.515		11.687	11.937	11.687	11.77	11.882	11.91
11.5533	7.437	0	0	0		7.437	7.25	7.375	7.25	0.187			11.5533	11.641	-0.0877143		11.625	11.893	-0.268		11.312	10.187	7	11.656	10.241	7.476		11.562	10.25	7.937	11.653	10.358	7.839		11.625	9.875	7.312	11.652	10.253	7.513		11.687	11.937	11.687	11.769	11.882	11.91
11.5621	7.437	0	0	0		7.437	7.25	7.375	7.25	0.187			11.5621	11.64	-0.0778571		11.625	11.892	-0.267		11.312	10.187	7	11.656	10.24	7.474		11.562	10.25	7.937	11.653	10.357	7.838		11.625	9.875	7.312	11.652	10.252	7.511		11.687	11.937	11.687	11.769	11.881	11.91
11.5533	7.437	0	0	0		7.437	7.25	7.375	7.25	0.187			11.5533	11.64	-0.0867143		11.625	11.892	-0.267		11.312	10.187	7	11.655	10.239	7.472		11.562	10.25	7.937	11.652	10.356	7.836		11.625	9.875	7.312	11.651	10.251	7.51		11.687	11.937	11.687	11.768	11.881	11.91
11.5621	7.437	0	0	0		7.437	7.25	7.375	7.25	0.187			11.5621	11.639	-0.0768571		11.687	11.892	-0.205		11.312	10.187	7	11.655	10.238	7.471		11.562	10.25	7.937	11.652	10.355	7.834		11.562	9.875	7.312	11.65	10.25	7.508		11.687	11.937	11.687	11.768	11.881	11.91
11.5621	7.437	0	0	0		7.437	7.25	7.437	7.25	0.187			11.5621	11.639	-0.0768571		11.625	11.892	-0.267		11.312	10.187	7	11.654	10.237	7.469		11.562	10.25	7.937	11.651	10.354	7.832		11.562	9.875	7.312	11.65	10.249	7.507		11.687	11.937	11.687	11.767	11.881	11.91
11.5533	7.437	0	0	0		7.437	7.25	7.437	7.25	0.187			11.5533	11.638	-0.0847143		11.625	11.892	-0.267		11.312	10.187	7	11.654	10.236	7.468		11.562	10.25	7.937	11.651	10.354	7.83		11.562	9.875	7.312	11.649	10.249	7.505		11.687	11.937	11.687	11.767	11.88	11.91
11.5621	7.437	0	0	0		7.437	7.25	7.437	7.25	0.187			11.5621	11.638	-0.0758571		11.687	11.892	-0.205		11.312	10.187	7	11.653	10.235	7.466		11.562	10.25	7.937	11.65	10.353	7.828		11.625	9.875	7.312	11.649	10.248	7.503		11.687	11.937	11.687	11.767	11.88	11.91
11.5621	7.5	0	0	0		7.5	7.25	7.375	7.25	0.25			11.5621	11.637	-0.0748571		11.625	11.891	-0.266		11.312	10.187	7	11.653	10.235	7.465		11.562	10.25	7.937	11.65	10.352	7.826		11.562	9.875	7.312	11.648	10.247	7.502		11.687	11.937	11.687	11.766	11.88	11.91
11.5621	7.5	0	0	0		7.5	7.25	7.375	7.25	0.25			11.5621	11.637	-0.0748571		11.687	11.891	-0.204		11.312	10.187	7	11.652	10.234	7.463		11.562	10.25	7.937	11.649	10.351	7.824		11.562	9.875	7.312	11.648	10.246	7.5		11.687	11.937	11.687	11.766	11.88	11.91
11.5533	7.5	0	0	0		7.5	7.25	7.375	7.25	0.25			11.5533	11.636	-0.0827143		11.625	11.891	-0.266		11.312	10.187	7	11.651	10.233	7.462		11.562	10.25	7.937	11.649	10.35	7.822		11.562	9.875	7.312	11.647	10.245	7.499		11.687	11.937	11.687	11.765	11.879	11.909
11.5621	7.5	0	0	0		7.5	7.25	7.375	7.25	0.25			11.5621	11.635	-0.0728571		11.625	11.891	-0.266		11.312	10.187	7	11.651	10.232	7.46		11.562	10.25	7.937	11.648	10.35	7.821		11.562	9.875	7.312	11.647	10.244	7.497		11.687	11.937	11.687	11.765	11.879	11.909
11.5621	7.437	0	0	0		7.437	7.187	7.375	7.25	0.25			11.5621	11.635	-0.0728571		11.625	11.891	-0.266		11.312	10.187	7	11.65	10.231	7.459		11.562	10.25	7.937	11.648	10.349	7.819		11.562	9.875	7.312	11.646	10.243	7.495		11.687	11.937	11.687	11.764	11.879	11.909
11.5621	7.375	0	0	0		7.375	7.187	7.375	7.187	0.188			11.5621	11.634	-0.0718571		11.625	11.891	-0.266		11.312	10.187	7	11.65	10.23	7.457		11.562	10.25	7.937	11.647	10.348	7.817		11.625	9.875	7.312	11.646	10.242	7.494		11.687	11.937	11.687	11.764	11.879	11.909
11.5621	7.375	0	0	0		7.375	7.187	7.375	7.187	0.188			11.5621	11.634	-0.0718571		11.625	11.89	-0.265		11.312	10.187	7	11.649	10.229	7.456		11.562	10.25	7.937	11.647	10.347	7.815		11.562	9.875	7.312	11.645	10.241	7.492		11.687	11.937	11.687	11.763	11.878	11.909
11.5621	7.375	0	0	0		7.375	7.187	7.375	7.187	0.188			11.5621	11.633	-0.0708571		11.625	11.89	-0.265		11.312	10.187	7	11.649	10.228	7.454		11.562	10.25	7.937	11.646	10.346	7.813		11.562	9.875	7.312	11.645	10.24	7.491		11.687	11.937	11.687	11.763	11.878	11.909
11.5621	7.375	0	0	0		7.375	7.187	7.375	7.187	0.188			11.5621	11.633	-0.0708571		11.625	11.89	-0.265		11.312	10.187	6.937	11.648	10.227	7.452		11.562	10.25	7.937	11.646	10.345	7.811		11.562	9.875	7.312	11.644	10.239	7.489		11.687	11.937	11.687	11.762	11.878	11.909
11.5621	7.375	0	0	0		7.375	7.25	7.375	7.187	0.188			11.5621	11.632	-0.0698571		11.625	11.89	-0.265		11.312	10.187	7	11.648	10.226	7.451		11.562	10.25	7.937	11.645	10.345	7.809		11.562	9.875	7.312	11.644	10.238	7.487		11.687	11.937	11.687	11.762	11.878	11.909
11.5533	7.437	0	0	0		7.437	7.25	7.375	7.187	0.25			11.5533	11.632	-0.0787143		11.625	11.89	-0.265		11.312	10.187	6.937	11.647	10.225	7.45		11.562	10.25	7.937	11.645	10.344	7.808		11.562	9.875	7.25	11.643	10.237	7.486		11.687	11.937	11.687	11.761	11.877	11.909
11.5621	7.437	0	0	0		7.437	7.25	7.375	7.187	0.25			11.5621	11.631	-0.0688571		11.625	11.89	-0.265		11.312	10.187	6.937	11.647	10.224	7.449		11.562	10.25	7.937	11.644	10.343	7.807		11.625	9.875	7.312	11.642	10.236	7.486		11.687	11.937	11.687	11.761	11.877	11.909
11.5533	7.437	0	0	0		7.437	7.25	7.375	7.187	0.25			11.5533	11.631	-0.0777143		11.625	11.889	-0.264		11.312	10.187	6.937	11.646	10.223	7.448		11.562	10.25	7.937	11.643	10.342	7.805		11.562	9.875	7.312	11.642	10.235	7.484		11.687	11.937	11.687	11.76	11.877	11.908
11.5444	7.437	0	0	0		7.437	7.25	7.375	7.187	0.25			11.5444	11.63	-0.0855714		11.625	11.889	-0.264		11.312	10.187	6.937	11.646	10.222	7.448		11.562	10.25	7.937	11.643	10.341	7.803		11.562	9.875	7.312	11.641	10.235	7.483		11.687	11.937	11.687	11.76	11.877	11.908
11.5621	7.437	0	0	0		7.437	7.25	7.375	7.187	0.25			11.5621	11.63	-0.0678571		11.625	11.889	-0.264		11.312	10.187	7	11.645	10.221	7.447		11.562	10.25	7.937	11.642	10.34	7.801		11.625	9.875	7.312	11.641	10.234	7.481		11.687	11.937	11.687	11.759	11.876	11.908
11.5444	7.437	0	0	0		7.437	7.25	7.375	7.187	0.25			11.5444	11.629	-0.0845714		11.625	11.889	-0.264		11.312	10.187	6.937	11.645	10.22	7.447		11.562	10.25	7.937	11.642	10.34	7.799		11.625	9.875	7.25	11.64	10.233	7.48		11.687	11.937	11.687	11.759	11.876	11.908
11.5533	7.437	0	0	0		7.437	7.25	7.375	7.187	0.25			11.5533	11.628	-0.0747143		11.625	11.889	-0.264		11.312	10.187	6.937	11.644	10.22	7.446		11.562	10.25	7.875	11.641	10.339	7.797		11.562	9.875	7.25	11.64	10.232	7.479		11.687	11.937	11.687	11.758	11.876	11.908
11.571	7.437	0	0	0		7.437	7.25	7.375	7.187	0.25			11.571	11.628	-0.057		11.625	11.889	-0.264		11.312	10.187	6.937	11.644	10.219	7.446		11.562	10.25	7.937	11.641	10.338	7.795		11.562	9.875	7.25	11.639	10.231	7.477		11.687	11.937	11.687	11.758	11.876	11.908
11.5621	7.437	0	0	0		7.437	7.25	7.375	7.187	0.25			11.5621	11.627	-0.0648571		11.625	11.889	-0.264		11.312	10.187	6.937	11.643	10.218	7.446		11.562	10.25	7.937	11.64	10.337	7.794		11.562	9.875	7.25	11.639	10.23	7.476		11.687	11.937	11.687	11.757	11.876	11.908
11.5533	7.437	0	0	0		7.437	7.312	7.375	7.187	0.25			11.5533	11.627	-0.0737143		11.625	11.888	-0.263		11.312	10.187	7	11.642	10.217	7.446		11.562	10.25	7.937	11.64	10.336	7.792		11.562	9.875	7.25	11.638	10.229	7.475		11.687	11.875	11.687	11.757	11.875	11.908
11.5533	7.437	0	0	0		7.437	7.312	7.437	7.187	0.25			11.5533	11.626	-0.0727143		11.625	11.888	-0.263		11.312	10.187	7	11.642	10.216	7.449		11.562	10.25	7.937	11.639	10.336	7.79		11.562	9.875	7.25	11.638	10.228	7.475		11.687	11.937	11.687	11.756	11.875	11.908
11.5533	7.437	0	0	0		7.437	7.312	7.437	7.187	0.25			11.5533	11.626	-0.0727143		11.625	11.888	-0.263		11.312	10.187	7	11.641	10.215	7.453		11.562	10.25	7.937	11.639	10.335	7.788		11.562	9.875	7.25	11.637	10.227	7.476		11.687	11.937	11.687	11.756	11.875	11.907
11.5444	7.437	0	0	0		7.437	7.312	7.375	7.187	0.25			11.5444	11.625	-0.0805714		11.625	11.888	-0.263		11.312	10.187	7	11.641	10.214	7.46		11.562	10.25	7.875	11.638	10.334	7.786		11.562	9.875	7.25	11.637	10.226	7.477		11.687	11.937	11.687	11.755	11.875	11.907
11.5533	7.5	0	0	0		7.5	7.312	7.437	7.187	0.313			11.5533	11.625	-0.0717143		11.625	11.888	-0.263		11.312	10.187	7	11.64	10.213	7.467		11.562	10.25	7.937	11.638	10.333	7.785		11.625	9.875	7.25	11.636	10.225	7.479		11.687	11.937	11.687	11.755	11.874	11.907
11.5533	7.5	0	0	0		7.5	7.312	7.437	7.25	0.25			11.5533	11.624	-0.0707143		11.625	11.888	-0.263		11.312	10.187	7	11.64	10.212	7.476		11.562	10.25	7.875	11.637	10.332	7.783		11.562	9.875	7.25	11.636	10.224	7.481		11.687	11.937	11.687	11.755	11.874	11.907
11.5533	7.5	0	0	0		7.5	7.312	7.437	7.25	0.25			11.5533	11.624	-0.0707143		11.625	11.888	-0.263		11.312	10.187	7	11.639	10.211	7.487		11.562	10.25	7.937	11.637	10.331	7.781		11.625	9.875	7.25	11.635	10.223	7.484		11.687	11.937	11.687	11.754	11.874	11.907
11.5533	7.5	0	0	0		7.5	7.312	7.437	7.25	0.25			11.5533	11.624	-0.0707143		11.625	11.888	-0.263		11.312	10.187	7	11.639	10.21	7.499		11.562	10.25	7.937	11.636	10.33	7.78		11.625	9.875	7.25	11.634	10.222	7.488		11.687	11.937	11.687	11.754	11.874	11.907
11.5621	7.5	0	0	0		7.5	7.312	7.437	7.312	0.188			11.5621	11.623	-0.0608571		11.625	11.887	-0.262		11.312	10.187	7	11.638	10.209	7.512		11.562	10.25	7.875	11.636	10.33	7.778		11.562	9.875	7.25	11.634	10.221	7.492		11.687	11.937	11.687	11.753	11.873	11.907
11.5533	7.5	0	0	0		7.5	7.312	7.437	7.375	0.188			11.5533	11.623	-0.0697143		11.625	11.887	-0.262		11.312	10.187	7	11.638	10.208	7.521		11.562	10.25	7.875	11.635	10.329	7.776		11.562	9.875	7.25	11.633	10.221	7.495		11.687	11.937	11.687	11.753	11.873	11.907
11.5621	7.5	0	0	0		7.5	7.25	7.437	7.375	0.25			11.5621	11.622	-0.0598571		11.625	11.887	-0.262		11.312	10.187	7	11.637	10.207	7.526		11.562	10.25	7.875	11.634	10.328	7.775		11.562	9.875	7.312	11.633	10.22	7.497		11.687	11.937	11.687	11.752	11.873	11.907
11.5533	7.5	0	0	0		7.5	7.25	7.437	7.375	0.25			11.5533	11.622	-0.0687143		11.625	11.887	-0.262		11.312	10.187	7	11.637	10.206	7.53		11.562	10.25	7.875	11.634	10.327	7.773		11.562	9.812	7.25	11.632	10.219	7.5		11.687	11.937	11.687	11.752	11.873	11.907
11.5533	7.5	0	0	0		7.5	7.25	7.437	7.312	0.25			11.5533	11.621	-0.0677143		11.625	11.887	-0.262		11.312	10.187	7	11.636	10.205	7.533		11.562	10.25	7.875	11.633	10.326	7.772		11.562	9.875	7.312	11.632	10.218	7.503		11.687	11.937	11.687	11.751	11.872	11.906
11.5444	7.5	0	0	0		7.5	7.312	7.437	7.312	0.188			11.5444	11.621	-0.0765714		11.625	11.887	-0.262		11.312	10.187	7	11.636	10.204	7.536		11.562	10.25	7.875	11.633	10.325	7.77		11.562	9.875	7.312	11.631	10.217	7.506		11.687	11.937	11.687	11.751	11.872	11.906
11.5444	7.5	0	0	0		7.5	7.312	7.437	7.25	0.25			11.5444	11.62	-0.0755714		11.625	11.887	-0.262		11.312	10.187	7	11.635	10.203	7.538		11.562	10.25	7.875	11.632	10.325	7.769		11.562	9.875	7.312	11.631	10.216	7.509		11.687	11.937	11.687	11.75	11.872	11.906
11.5533	7.5	0	0	0		7.5	7.312	7.437	7.25	0.25			11.5533	11.62	-0.0667143		11.625	11.886	-0.261		11.312	10.125	7	11.634	10.202	7.539		11.562	10.25	7.875	11.632	10.324	7.767		11.562	9.875	7.312	11.63	10.215	7.512		11.75	11.937	11.687	11.75	11.872	11.906
11.5444	7.5	0	0	0		7.5	7.25	7.437	7.25	0.25			11.5444	11.62	-0.0755714		11.625	11.886	-0.261		11.312	10.187	6.937	11.634	10.201	7.54		11.562	10.25	7.875	11.631	10.323	7.766		11.562	9.875	7.312	11.63	10.214	7.515		11.687	11.937	11.687	11.749	11.871	11.906
11.5533	7.5	0	0	0		7.5	7.312	7.437	7.25	0.25			11.5533	11.619	-0.0657143		11.625	11.886	-0.261		11.312	10.125	6.937	11.633	10.2	7.538		11.562	10.25	7.875	11.631	10.322	7.765		11.562	9.875	7.312	11.629	10.213	7.516		11.687	11.937	11.687	11.749	11.871	11.906
11.5533	7.5	0	0	0		7.5	7.312	7.437	7.187	0.313			11.5533	11.618	-0.0647143		11.625	11.886	-0.261		11.312	10.187	6.937	11.633	10.2	7.532		11.562	10.25	7.875	11.63	10.321	7.764		11.562	9.812	7.312	11.629	10.212	7.514		11.687	11.937	11.687	11.748	11.871	11.906
11.5533	7.5	0	0	0		7.5	7.312	7.5	7.25	0.25			11.5533	11.618	-0.0647143		11.625	11.886	-0.261		11.312	10.125	6.937	11.632	10.199	7.527		11.562	10.25	7.875	11.63	10.32	7.762		11.625	9.812	7.312	11.628	10.211	7.512		11.687	11.937	11.687	11.748	11.871	11.906
11.5444	7.5	0	0	0		7.5	7.25	7.5	7.25	0.25			11.5444	11.617	-0.0725714		11.625	11.886	-0.261		11.312	10.125	6.937	11.632	10.198	7.522		11.562	10.25	7.875	11.629	10.32	7.761		11.562	9.812	7.312	11.627	10.21	7.51		11.687	11.937	11.687	11.747	11.87	11.906
11.5444	7.5	0	0	0		7.5	7.25	7.5	7.25	0.25			11.5444	11.617	-0.0725714		11.625	11.886	-0.261		11.312	10.187	6.937	11.631	10.197	7.517		11.562	10.25	7.875	11.629	10.319	7.76		11.562	9.812	7.312	11.627	10.209	7.509		11.687	11.937	11.687	11.747	11.87	11.905
11.5444	7.562	0	0	0		7.562	7.25	7.437	7.25	0.312			11.5444	11.616	-0.0715714		11.625	11.885	-0.26		11.312	10.125	6.937	11.631	10.196	7.511		11.562	10.25	7.875	11.628	10.318	7.759		11.562	9.812	7.312	11.626	10.208	7.507		11.687	11.937	11.687	11.746	11.87	11.905
11.5444	7.5	0	0	0		7.5	7.25	7.437	7.25	0.25			11.5444	11.616	-0.0715714		11.625	11.885	-0.26		11.312	10.125	6.937	11.63	10.195	7.506		11.562	10.25	7.875	11.628	10.317	7.758		11.562	9.812	7.312	11.626	10.207	7.505		11.687	11.937	11.687	11.746	11.87	11.905
11.5444	7.5	0	0	0		7.5	7.312	7.437	7.187	0.313			11.5444	11.615	-0.0705714		11.625	11.885	-0.26		11.312	10.125	6.937	11.63	10.194	7.501		11.562	10.25	7.875	11.627	10.316	7.757		11.562	9.875	7.312	11.625	10.206	7.503		11.687	11.937	11.687	11.745	11.869	11.905
11.5533	7.5	0	0	0		7.5	7.25	7.437	7.187	0.313			11.5533	11.614	-0.0607143		11.625	11.885	-0.26		11.312	10.187	6.937	11.629	10.193	7.496		11.562	10.25	7.875	11.627	10.315	7.755		11.562	9.812	7.312	11.625	10.205	7.501		11.687	11.937	11.687	11.745	11.869	11.905
11.5444	7.5	0	0	0		7.5	7.25	7.437	7.187	0.313			11.5444	11.614	-0.0695714		11.625	11.885	-0.26		11.312	10.125	6.937	11.629	10.192	7.49		11.562	10.25	7.875	11.626	10.314	7.754		11.562	9.812	7.312	11.624	10.204	7.5		11.687	11.937	11.687	11.744	11.869	11.905
11.5444	7.5	0	0	0		7.5	7.312	7.437	7.187	0.313			11.5444	11.613	-0.0685714		11.625	11.884	-0.259		11.312	10.125	6.937	11.628	10.191	7.485		11.562	10.187	7.875	11.625	10.314	7.753		11.562	9.812	7.312	11.624	10.203	7.498		11.687	11.937	11.687	11.744	11.869	11.905
11.5356	7.5	0	0	0		7.5	7.312	7.437	7.187	0.313			11.5356	11.613	-0.0774286		11.625	11.884	-0.259		11.312	10.125	6.937	11.627	10.19	7.48		11.562	10.25	7.875	11.625	10.313	7.752		11.562	9.812	7.312	11.623	10.203	7.496		11.687	11.937	11.687	11.743	11.868	11.905
11.5533	7.5	0	0	0		7.5	7.25	7.437	7.187	0.313			11.5533	11.612	-0.0587143		11.625	11.884	-0.259		11.312	10.125	6.937	11.627	10.189	7.474		11.562	10.187	7.875	11.624	10.312	7.751		11.562	9.812	7.312	11.623	10.202	7.494		11.687	11.937	11.687	11.743	11.868	11.905
11.5356	7.437	0	0	0		7.437	7.25	7.437	7.187	0.25			11.5356	11.611	-0.0754286		11.625	11.884	-0.259		11.312	10.125	6.937	11.626	10.188	7.469		11.562	10.25	7.875	11.624	10.311	7.75		11.562	9.812	7.312	11.622	10.201	7.493		11.687	11.937	11.687	11.742	11.868	11.904
11.5444	7.437	0	0	0		7.437	7.25	7.437	7.187	0.25			11.5444	11.611	-0.0665714		11.625	11.884	-0.259		11.312	10.125	6.937	11.626	10.187	7.464		11.562	10.25	7.875	11.623	10.31	7.749		11.562	9.812	7.312	11.622	10.2	7.491		11.687	11.937	11.687	11.742	11.868	11.904
11.5356	7.437	0	0	0		7.437	7.25	7.375	7.125	0.312			11.5356	11.61	-0.0744286		11.625	11.884	-0.259		11.312	10.125	6.937	11.625	10.186	7.459		11.562	10.25	7.875	11.623	10.309	7.747		11.562	9.812	7.312	11.621	10.199	7.489		11.687	11.937	11.687	11.741	11.867	11.904
11.5356	7.437	0	0	0		7.437	7.25	7.375	7.125	0.312			11.5356	11.61	-0.0744286		11.625	11.883	-0.258		11.312	10.125	6.937	11.625	10.185	7.454		11.562	10.187	7.875	11.622	10.308	7.746		11.562	9.812	7.312	11.621	10.198	7.487		11.687	11.937	11.687	11.741	11.867	11.904
11.5444	7.5	0	0	0		7.5	7.25	7.375	7.187	0.313			11.5444	11.609	-0.0645714		11.625	11.883	-0.258		11.312	10.125	6.937	11.624	10.184	7.456		11.562	10.25	7.875	11.622	10.308	7.745		11.562	9.812	7.312	11.62	10.197	7.488		11.687	11.937	11.687	11.741	11.867	11.904
11.5444	7.5	0	0	0		7.5	7.25	7.375	7.187	0.313			11.5444	11.609	-0.0645714		11.625	11.883	-0.258		11.312	10.125	6.937	11.624	10.183	7.459		11.562	10.187	7.875	11.621	10.307	7.744		11.562	9.812	7.312	11.619	10.196	7.489		11.687	11.937	11.687	11.74	11.866	11.904
11.5444	7.5	0	0	0		7.5	7.25	7.375	7.125	0.375			11.5444	11.608	-0.0635714		11.625	11.883	-0.258		11.312	10.125	6.937	11.623	10.182	7.462		11.562	10.187	7.875	11.621	10.306	7.743		11.562	9.812	7.312	11.619	10.195	7.491		11.687	11.937	11.687	11.74	11.866	11.904
11.5444	7.5	0	0	0		7.5	7.187	7.375	7.187	0.313			11.5444	11.608	-0.0635714		11.625	11.883	-0.258		11.312	10.125	6.937	11.623	10.181	7.465		11.562	10.25	7.875	11.62	10.305	7.743		11.562	9.812	7.312	11.618	10.194	7.492		11.687	11.875	11.687	11.739	11.866	11.904
11.5444	7.5	0	0	0		7.5	7.187	7.375	7.187	0.313			11.5444	11.607	-0.0625714		11.625	11.883	-0.258		11.312	10.125	6.875	11.622	10.18	7.468		11.562	10.187	7.875	11.62	10.304	7.742		11.562	9.812	7.312	11.618	10.193	7.493		11.687	11.937	11.687	11.739	11.866	11.903
11.5444	7.5	0	0	0		7.5	7.187	7.375	7.187	0.313			11.5444	11.607	-0.0625714		11.625	11.883	-0.258		11.312	10.125	6.875	11.622	10.179	7.471		11.562	10.25	7.875	11.619	10.303	7.741		11.562	9.812	7.312	11.617	10.192	7.494		11.687	11.937	11.687	11.738	11.865	11.903
11.5356	7.5	0	0	0		7.5	7.187	7.375	7.187	0.313			11.5356	11.606	-0.0704286		11.625	11.883	-0.258		11.312	10.125	6.875	11.621	10.178	7.474		11.562	10.187	7.875	11.619	10.302	7.74		11.562	9.812	7.312	11.617	10.191	7.495		11.687	11.937	11.687	11.738	11.865	11.903
11.5444	7.5	0	0	0		7.5	7.187	7.375	7.187	0.313			11.5444	11.606	-0.0615714		11.625	11.882	-0.257		11.312	10.125	6.875	11.621	10.177	7.477		11.562	10.187	7.875	11.618	10.302	7.739		11.562	9.812	7.312	11.616	10.19	7.496		11.687	11.937	11.687	11.737	11.865	11.903
11.5444	7.5	0	0	0		7.5	7.187	7.375	7.187	0.313			11.5444	11.605	-0.0605714		11.625	11.882	-0.257		11.312	10.125	6.875	11.62	10.177	7.48		11.562	10.187	7.875	11.617	10.301	7.738		11.562	9.812	7.312	11.616	10.189	7.497		11.687	11.937	11.687	11.737	11.865	11.903
11.5356	7.5	0	0	0		7.5	7.187	7.375	7.125	0.375			11.5356	11.605	-0.0694286		11.625	11.882	-0.257		11.312	10.125	6.875	11.619	10.176	7.483		11.562	10.187	7.875	11.617	10.3	7.737		11.562	9.812	7.312	11.615	10.188	7.498		11.687	11.937	11.687	11.736	11.864	11.903
11.5356	7.5	0	0	0		7.5	7.187	7.375	7.125	0.375			11.5356	11.604	-0.0684286		11.625	11.882	-0.257		11.312	10.125	6.875	11.619	10.175	7.486		11.562	10.187	7.875	11.616	10.299	7.736		11.562	9.812	7.312	11.615	10.187	7.499		11.687	11.937	11.687	11.736	11.864	11.903
11.5533	7.5	0	0	0		7.5	7.187	7.437	7.125	0.375			11.5533	11.604	-0.0507143		11.625	11.882	-0.257		11.312	10.125	6.875	11.618	10.174	7.488		11.562	10.25	7.875	11.616	10.298	7.735		11.562	9.812	7.312	11.614	10.186	7.5		11.687	11.937	11.687	11.735	11.864	11.903
11.5356	7.5	0	0	0		7.5	7.25	7.437	7.125	0.375			11.5356	11.603	-0.0674286		11.625	11.882	-0.257		11.312	10.125	6.875	11.618	10.173	7.491		11.562	10.187	7.875	11.615	10.297	7.734		11.562	9.812	7.312	11.614	10.185	7.501		11.687	11.937	11.687	11.735	11.864	11.902
11.5267	7.5	0	0	0		7.5	7.25	7.437	7.125	0.375			11.5267	11.603	-0.0762857		11.625	11.882	-0.257		11.312	10.125	6.875	11.617	10.172	7.494		11.562	10.187	7.875	11.615	10.296	7.734		11.562	9.812	7.312	11.613	10.184	7.502		11.687	11.937	11.687	11.734	11.863	11.902
11.5267	7.5	0	0	0		7.5	7.25	7.437	7.125	0.375			11.5267	11.602	-0.0752857		11.625	11.881	-0.256		11.312	10.125	6.875	11.617	10.171	7.497		11.562	10.187	7.875	11.614	10.295	7.733		11.562	9.812	7.312	11.612	10.183	7.503		11.75	11.937	11.687	11.734	11.863	11.902
11.5267	7.5	0	0	0		7.5	7.25	7.437	7.125	0.375			11.5267	11.602	-0.0752857		11.625	11.881	-0.256		11.312	10.125	6.812	11.616	10.17	7.5		11.562	10.187	7.875	11.614	10.295	7.732		11.562	9.812	7.312	11.612	10.182	7.504		11.687	11.937	11.687	11.733	11.863	11.902
11.5356	7.437	0	0	0		7.437	7.187	7.375	7.062	0.375			11.5356	11.601	-0.0654286		11.625	11.881	-0.256		11.312	10.125	6.812	11.616	10.169	7.502		11.562	10.187	7.812	11.613	10.294	7.731		11.562	9.812	7.312	11.611	10.182	7.506		11.687	11.937	11.687	11.733	11.863	11.902
11.5267	7.437	0	0	0		7.437	7.187	7.375	7.062	0.375			11.5267	11.601	-0.0742857		11.625	11.881	-0.256		11.312	10.125	6.812	11.615	10.168	7.504		11.562	10.187	7.875	11.613	10.293	7.73		11.562	9.812	7.312	11.611	10.181	7.507		11.687	11.937	11.687	11.732	11.862	11.902
11.5356	7.375	0	0	0		7.375	7.125	7.375	7.062	0.313			11.5356	11.6	-0.0644286		11.625	11.881	-0.256		11.312	10.125	6.812	11.615	10.167	7.506		11.562	10.187	7.812	11.612	10.292	7.73		11.562	9.812	7.312	11.61	10.18	7.509		11.687	11.937	11.687	11.732	11.862	11.902
11.5444	7.375	0	0	0		7.375	7.125	7.375	7.062	0.313			11.5444	11.6	-0.0555714		11.625	11.881	-0.256		11.312	10.125	6.812	11.614	10.166	7.509		11.562	10.187	7.812	11.612	10.291	7.729		11.562	9.812	7.312	11.61	10.179	7.51		11.687	11.937	11.687	11.731	11.862	11.902
11.5356	7.375	0	0	0		7.375	7.125	7.312	7.062	0.313			11.5356	11.599	-0.0634286		11.625	11.881	-0.256		11.312	10.125	6.812	11.614	10.165	7.511		11.562	10.187	7.812	11.611	10.29	7.729		11.562	9.812	7.25	11.609	10.178	7.512		11.687	11.937	11.687	11.731	11.862	11.902
11.5267	7.375	0	0	0		7.375	7.125	7.312	7.062	0.313			11.5267	11.599	-0.0722857		11.625	11.881	-0.256		11.312	10.125	6.812	11.613	10.164	7.513		11.562	10.187	7.812	11.611	10.289	7.728		11.562	9.812	7.25	11.609	10.177	7.513		11.687	11.937	11.687	11.73	11.861	11.901
11.5267	7.375	0	0	0		7.375	7.187	7.312	7.062	0.313			11.5267	11.599	-0.0722857		11.625	11.88	-0.255		11.312	10.125	6.812	11.613	10.163	7.515		11.562	10.187	7.812	11.61	10.288	7.728		11.562	9.812	7.25	11.608	10.176	7.515		11.687	11.937	11.687	11.73	11.861	11.901
11.5267	7.437	0	0	0		7.437	7.187	7.312	7.062	0.375			11.5267	11.598	-0.0712857		11.625	11.88	-0.255		11.312	10.125	6.812	11.612	10.162	7.517		11.562	10.187	7.812	11.61	10.288	7.727		11.562	9.812	7.25	11.608	10.175	7.517		11.687	11.937	11.687	11.729	11.861	11.901
11.5356	7.437	0	0	0		7.437	7.187	7.375	7.125	0.312			11.5356	11.598	-0.0624286		11.625	11.88	-0.255		11.312	10.125	6.812	11.611	10.161	7.519		11.562	10.187	7.812	11.609	10.287	7.727		11.562	9.812	7.25	11.607	10.174	7.518		11.687	11.937	11.687	11.729	11.86	11.901
11.5356	7.437	0	0	0		7.437	7.187	7.375	7.062	0.375			11.5356	11.597	-0.0614286		11.625	11.88	-0.255		11.312	10.125	6.812	11.611	10.16	7.521		11.562	10.187	7.812	11.608	10.286	7.726		11.562	9.812	7.25	11.607	10.173	7.52		11.687	11.937	11.687	11.728	11.86	11.901
11.5267	7.437	0	0	0		7.437	7.187	7.375	7.062	0.375			11.5267	11.597	-0.0702857		11.625	11.88	-0.255		11.312	10.125	6.812	11.61	10.159	7.523		11.562	10.187	7.812	11.608	10.285	7.725		11.562	9.812	7.25	11.606	10.172	7.521		11.687	11.937	11.687	11.728	11.86	11.901
11.5356	7.5	0	0	0		7.5	7.187	7.375	7.062	0.438			11.5356	11.596	-0.0604286		11.625	11.88	-0.255		11.312	10.125	6.812	11.61	10.158	7.525		11.562	10.187	7.812	11.607	10.284	7.725		11.562	9.812	7.25	11.605	10.171	7.523		11.687	11.937	11.687	11.728	11.86	11.901
11.5356	7.5	0	0	0		7.5	7.187	7.375	7.062	0.438			11.5356	11.596	-0.0604286		11.625	11.88	-0.255		11.312	10.125	6.812	11.609	10.157	7.527		11.562	10.187	7.812	11.607	10.283	7.724		11.562	9.812	7.25	11.605	10.17	7.524		11.687	11.937	11.687	11.727	11.859	11.901
11.5356	7.5	0	0	0		7.5	7.187	7.375	7.062	0.438			11.5356	11.595	-0.0594286		11.625	11.88	-0.255		11.312	10.125	6.812	11.609	10.156	7.529		11.562	10.187	7.812	11.606	10.282	7.724		11.562	9.812	7.25	11.604	10.169	7.526		11.687	11.937	11.687	11.727	11.859	11.9
11.5267	7.5	0	0	0		7.5	7.25	7.437	7.062	0.438			11.5267	11.595	-0.0682857		11.625	11.879	-0.254		11.312	10.125	6.812	11.608	10.155	7.531		11.562	10.187	7.812	11.606	10.281	7.723		11.562	9.812	7.25	11.604	10.168	7.528		11.687	11.937	11.687	11.726	11.859	11.9
11.5267	7.5	0	0	0		7.5	7.187	7.437	7.062	0.438			11.5267	11.594	-0.0672857		11.625	11.879	-0.254		11.312	10.125	6.812	11.608	10.155	7.533		11.562	10.187	7.812	11.605	10.281	7.723		11.562	9.812	7.25	11.603	10.167	7.529		11.687	11.937	11.687	11.726	11.859	11.9
11.5356	7.5	0	0	0		7.5	7.25	7.375	7.062	0.438			11.5356	11.594	-0.0584286		11.625	11.879	-0.254		11.312	10.125	6.812	11.607	10.154	7.534		11.562	10.187	7.812	11.605	10.28	7.722		11.562	9.812	7.25	11.603	10.166	7.53		11.687	11.937	11.687	11.725	11.858	11.9
11.5356	7.5	0	0	0		7.5	7.25	7.375	7.062	0.438			11.5356	11.593	-0.0574286		11.625	11.879	-0.254		11.312	10.125	6.812	11.607	10.153	7.531		11.562	10.187	7.812	11.604	10.279	7.721		11.562	9.812	7.25	11.602	10.165	7.528		11.687	11.937	11.687	11.725	11.858	11.9
11.5267	7.5	0	0	0		7.5	7.25	7.437	7.062	0.438			11.5267	11.592	-0.0652857		11.625	11.879	-0.254		11.312	10.125	6.812	11.606	10.152	7.529		11.562	10.187	7.812	11.604	10.278	7.72		11.562	9.812	7.25	11.602	10.164	7.527		11.687	11.875	11.687	11.724	11.858	11.9
11.5267	7.5	0	0	0		7.5	7.25	7.375	7.062	0.438			11.5267	11.592	-0.0652857		11.625	11.879	-0.254		11.312	10.125	6.812	11.606	10.151	7.526		11.562	10.187	7.812	11.603	10.277	7.72		11.562	9.812	7.25	11.601	10.163	7.525		11.687	11.937	11.687	11.724	11.858	11.9
11.5267	7.5	0	0	0		7.5	7.25	7.375	7.062	0.438			11.5267	11.591	-0.0642857		11.625	11.879	-0.254		11.312	10.125	6.812	11.605	10.15	7.523		11.562	10.187	7.812	11.603	10.276	7.719		11.562	9.812	7.25	11.601	10.163	7.524		11.687	11.937	11.687	11.723	11.857	11.9
11.5356	7.5	0	0	0		7.5	7.25	7.375	7	0.5			11.5356	11.591	-0.0554286		11.625	11.878	-0.253		11.312	10.125	6.812	11.604	10.149	7.521		11.562	10.187	7.812	11.602	10.275	7.718		11.562	9.812	7.25	11.6	10.162	7.522		11.687	11.937	11.687	11.723	11.857	11.899
11.5356	7.437	0	0	0		7.437	7.25	7.375	7	0.437			11.5356	11.59	-0.0544286		11.625	11.878	-0.253		11.312	10.125	6.75	11.604	10.148	7.518		11.562	10.187	7.812	11.602	10.274	7.717		11.562	9.812	7.25	11.6	10.161	7.52		11.687	11.937	11.687	11.722	11.857	11.899
11.5356	7.5	0	0	0		7.5	7.25	7.375	7	0.5			11.5356	11.59	-0.0544286		11.625	11.878	-0.253		11.312	10.062	6.75	11.603	10.147	7.515		11.562	10.187	7.812	11.601	10.274	7.717		11.562	9.812	7.25	11.599	10.16	7.519		11.687	11.875	11.687	11.722	11.857	11.899
11.5267	7.5	0	0	0		7.5	7.25	7.375	7	0.5			11.5267	11.589	-0.0622857		11.625	11.878	-0.253		11.312	10.125	6.75	11.603	10.146	7.512		11.562	10.187	7.812	11.601	10.273	7.716		11.562	9.812	7.25	11.599	10.159	7.517		11.687	11.937	11.687	11.721	11.856	11.899
11.5267	7.5	0	0	0		7.5	7.25	7.375	7	0.5			11.5267	11.589	-0.0622857		11.625	11.878	-0.253		11.312	10.125	6.75	11.602	10.145	7.51		11.562	10.187	7.812	11.6	10.272	7.715		11.562	9.812	7.25	11.598	10.158	7.516		11.687	11.937	11.687	11.721	11.856	11.899
11.5267	7.437	0	0	0		7.437	7.25	7.375	7	0.437			11.5267	11.588	-0.0612857		11.625	11.878	-0.253		11.312	10.125	6.75	11.602	10.144	7.507		11.562	10.187	7.812	11.599	10.271	7.714		11.562	9.812	7.25	11.597	10.157	7.514		11.687	11.937	11.687	11.72	11.856	11.899
11.5356	7.437	0	0	0		7.437	7.187	7.375	7	0.437			11.5356	11.588	-0.0524286		11.625	11.877	-0.252		11.312	10.062	6.75	11.601	10.143	7.504		11.562	10.187	7.812	11.599	10.27	7.714		11.562	9.812	7.25	11.597	10.156	7.513		11.687	11.937	11.687	11.72	11.855	11.899
11.5356	7.437	0	0	0		7.437	7.187	7.375	7.062	0.375			11.5356	11.587	-0.0514286		11.625	11.877	-0.252		11.312	10.125	6.75	11.601	10.142	7.502		11.562	10.187	7.812	11.598	10.269	7.713		11.562	9.812	7.25	11.596	10.155	7.511		11.687	11.937	11.687	11.719	11.855	11.898
11.5267	7.437	0	0	0		7.437	7.187	7.375	7.062	0.375			11.5267	11.586	-0.0592857		11.625	11.877	-0.252		11.312	10.125	6.75	11.6	10.141	7.499		11.562	10.187	7.812	11.598	10.268	7.712		11.562	9.812	7.25	11.596	10.154	7.51		11.687	11.937	11.687	11.719	11.855	11.898
11.5267	7.437	0	0	0		7.437	7.187	7.375	7.062	0.375			11.5267	11.586	-0.0592857		11.625	11.877	-0.252		11.312	10.125	6.75	11.6	10.14	7.496		11.562	10.187	7.812	11.597	10.267	7.711		11.562	9.812	7.25	11.595	10.153	7.508		11.687	11.875	11.687	11.718	11.855	11.898
11.5267	7.437	0	0	0		7.437	7.187	7.312	7.062	0.375			11.5267	11.585	-0.0582857		11.625	11.877	-0.252		11.312	10.062	6.75	11.599	10.139	7.494		11.562	10.187	7.812	11.597	10.266	7.711		11.562	9.812	7.25	11.595	10.152	7.506		11.687	11.937	11.687	11.718	11.854	11.898
11.5267	7.437	0	0	0		7.437	7.187	7.375	7.062	0.375			11.5267	11.585	-0.0582857		11.625	11.877	-0.252		11.312	10.125	6.75	11.599	10.139	7.491		11.562	10.187	7.812	11.596	10.266	7.71		11.562	9.812	7.25	11.594	10.151	7.505		11.687	11.937	11.687	11.717	11.854	11.898
11.5267	7.437	0	0	0		7.437	7.125	7.312	7.125	0.312			11.5267	11.584	-0.0572857		11.625	11.876	-0.251		11.312	10.062	6.75	11.598	10.138	7.488		11.562	10.187	7.812	11.596	10.265	7.709		11.562	9.812	7.25	11.594	10.15	7.503		11.687	11.937	11.687	11.717	11.854	11.898
11.5267	7.375	0	0	0		7.375	7.187	7.312	7.187	0.188			11.5267	11.584	-0.0572857		11.625	11.876	-0.251		11.312	10.062	6.75	11.597	10.137	7.486		11.562	10.187	7.812	11.595	10.264	7.708		11.562	9.812	7.25	11.593	10.149	7.502		11.687	11.875	11.687	11.716	11.854	11.898
11.5267	7.437	0	0	0		7.437	7.125	7.312	7.187	0.312			11.5267	11.583	-0.0562857		11.625	11.876	-0.251		11.312	10.062	6.812	11.597	10.136	7.483		11.562	10.187	7.812	11.595	10.263	7.708		11.562	9.812	7.25	11.593	10.148	7.5		11.687	11.937	11.687	11.716	11.853	11.898
11.5267	7.375	0	0	0		7.375	7.125	7.312	7.187	0.25			11.5267	11.583	-0.0562857		11.625	11.876	-0.251		11.312	10.062	6.812	11.596	10.135	7.48		11.562	10.187	7.812	11.594	10.262	7.707		11.562	9.812	7.25	11.592	10.147	7.499		11.687	11.875	11.687	11.715	11.853	11.897
11.5267	7.437	0	0	0		7.437	7.125	7.312	7.187	0.312			11.5267	11.582	-0.0552857		11.625	11.876	-0.251		11.312	10.062	6.812	11.596	10.134	7.478		11.562	10.187	7.812	11.594	10.261	7.706		11.562	9.812	7.25	11.592	10.147	7.497		11.687	11.875	11.687	11.715	11.853	11.897
11.5267	7.437	0	0	0		7.437	7.125	7.312	7.187	0.312			11.5267	11.581	-0.0542857		11.625	11.876	-0.251		11.312	10.062	6.812	11.595	10.133	7.475		11.562	10.187	7.812	11.593	10.26	7.705		11.562	9.812	7.25	11.591	10.146	7.496		11.687	11.875	11.687	11.715	11.852	11.897
11.5267	7.437	0	0	0		7.437	7.125	7.312	7.187	0.312			11.5267	11.581	-0.0542857		11.625	11.875	-0.25		11.312	10.062	6.812	11.595	10.132	7.472		11.562	10.187	7.812	11.593	10.259	7.705		11.562	9.812	7.25	11.59	10.145	7.494		11.687	11.937	11.687	11.714	11.852	11.897
11.5267	7.437	0	0	0		7.437	7.125	7.312	7.125	0.312			11.5267	11.58	-0.0532857		11.625	11.875	-0.25		11.312	10.062	6.812	11.594	10.131	7.47		11.562	10.187	7.812	11.592	10.259	7.704		11.562	9.812	7.25	11.59	10.144	7.492		11.687	11.875	11.687	11.714	11.852	11.897
11.5267	7.437	0	0	0		7.437	7.187	7.312	7.125	0.312			11.5267	11.58	-0.0532857		11.625	11.875	-0.25		11.312	10.062	6.812	11.594	10.13	7.467		11.562	10.187	7.812	11.591	10.258	7.703		11.562	9.812	7.25	11.589	10.143	7.491		11.687	11.937	11.687	11.713	11.852	11.897
11.5267	7.437	0	0	0		7.437	7.25	7.375	7.125	0.312			11.5267	11.579	-0.0522857		11.625	11.875	-0.25		11.312	10.062	6.812	11.593	10.129	7.464		11.562	10.187	7.812	11.591	10.257	7.702		11.562	9.812	7.25	11.589	10.142	7.489		11.687	11.875	11.687	11.713	11.851	11.897
11.5267	7.437	0	0	0		7.437	7.25	7.375	7.125	0.312			11.5267	11.579	-0.0522857		11.625	11.875	-0.25		11.312	10.062	6.812	11.593	10.128	7.462		11.562	10.187	7.812	11.59	10.256	7.702		11.562	9.75	7.25	11.588	10.141	7.488		11.687	11.937	11.687	11.712	11.851	11.897
11.5267	7.437	0	0	0		7.437	7.312	7.375	7.187	0.25			11.5267	11.578	-0.0512857		11.625	11.875	-0.25		11.312	10.062	6.812	11.592	10.127	7.459		11.562	10.187	7.812	11.59	10.255	7.701		11.562	9.812	7.25	11.588	10.14	7.486		11.687	11.937	11.687	11.712	11.851	11.896
11.5267	7.437	0	0	0		7.437	7.25	7.375	7.187	0.25			11.5267	11.578	-0.0512857		11.625	11.875	-0.25		11.312	10.062	6.812	11.592	10.126	7.456		11.562	10.187	7.812	11.589	10.254	7.7		11.562	9.812	7.25	11.587	10.139	7.485		11.687	11.937	11.687	11.711	11.851	11.896
11.5267	7.437	0	0	0		7.437	7.25	7.375	7.187	0.25			11.5267	11.577	-0.0502857		11.625	11.874	-0.249		11.312	10.062	6.875	11.591	10.125	7.453		11.562	10.187	7.812	11.589	10.253	7.699		11.562	9.812	7.25	11.587	10.138	7.483		11.687	11.875	11.687	11.711	11.85	11.896
11.5267	7.437	0	0	0		7.437	7.25	7.375	7.187	0.25			11.5267	11.576	-0.0492857		11.625	11.874	-0.249		11.312	10.062	6.875	11.59	10.124	7.451		11.562	10.187	7.812	11.588	10.252	7.699		11.562	9.75	7.25	11.586	10.137	7.482		11.687	11.937	11.687	11.71	11.85	11.896
11.5356	7.375	0	0	0		7.375	7.25	7.375	7.187	0.188			11.5356	11.576	-0.0404286		11.625	11.874	-0.249		11.312	10.062	6.875	11.59	10.123	7.448		11.562	10.187	7.812	11.588	10.251	7.698		11.562	9.75	7.25	11.586	10.136	7.48		11.687	11.937	11.687	11.71	11.85	11.896
11.5267	7.375	0	0	0		7.375	7.187	7.375	7.25	0.188			11.5267	11.575	-0.0482857		11.625	11.874	-0.249		11.312	10.062	6.875	11.589	10.123	7.447		11.562	10.187	7.812	11.587	10.251	7.697		11.562	9.75	7.25	11.585	10.135	7.479		11.687	11.875	11.687	11.709	11.85	11.896
11.5267	7.375	0	0	0		7.375	7.187	7.312	7.25	0.188			11.5267	11.575	-0.0482857		11.625	11.874	-0.249		11.312	10.062	6.875	11.589	10.122	7.446		11.562	10.187	7.812	11.587	10.25	7.696		11.562	9.75	7.25	11.584	10.134	7.478		11.687	11.937	11.687	11.709	11.849	11.896
11.5267	7.375	0	0	0		7.375	7.187	7.312	7.25	0.188			11.5267	11.574	-0.0472857		11.625	11.874	-0.249		11.312	10.062	6.875	11.588	10.121	7.446		11.562	10.187	7.812	11.586	10.249	7.696		11.562	9.75	7.25	11.584	10.133	7.478		11.687	11.875	11.687	11.708	11.849	11.895
11.5267	7.375	0	0	0		7.375	7.187	7.312	7.25	0.188			11.5267	11.574	-0.0472857		11.625	11.873	-0.248		11.312	10.062	6.875	11.588	10.12	7.446		11.562	10.187	7.812	11.586	10.248	7.695		11.562	9.75	7.25	11.583	10.132	7.477		11.687	11.937	11.687	11.708	11.849	11.895
11.5267	7.375	0	0	0		7.375	7.187	7.312	7.25	0.188			11.5267	11.573	-0.0462857		11.625	11.873	-0.248		11.312	10.062	6.937	11.587	10.119	7.446		11.562	10.187	7.812	11.585	10.247	7.694		11.562	9.75	7.25	11.583	10.132	7.477		11.687	11.937	11.687	11.707	11.848	11.895
11.5267	7.375	0	0	0		7.375	7.25	7.375	7.25	0.125			11.5267	11.573	-0.0462857		11.625	11.873	-0.248		11.312	10.062	6.937	11.587	10.118	7.446		11.562	10.187	7.812	11.585	10.246	7.693		11.562	9.75	7.25	11.582	10.131	7.476		11.687	11.937	11.687	11.707	11.848	11.895
11.5267	7.375	0	0	0		7.375	7.25	7.375	7.312	0.125			11.5267	11.572	-0.0452857		11.625	11.873	-0.248		11.312	10.062	6.937	11.586	10.117	7.446		11.562	10.187	7.812	11.584	10.245	7.693		11.562	9.75	7.25	11.582	10.13	7.476		11.687	11.937	11.687	11.706	11.848	11.895
11.5267	7.375	0	0	0		7.375	7.187	7.312	7.312	0.188			11.5267	11.572	-0.0452857		11.625	11.873	-0.248		11.312	10.062	6.937	11.586	10.116	7.445		11.562	10.187	7.812	11.583	10.244	7.692		11.562	9.75	7.25	11.581	10.129	7.475		11.687	11.875	11.687	11.706	11.848	11.895
11.5267	7.375	0	0	0		7.375	7.187	7.312	7.312	0.188			11.5267	11.571	-0.0442857		11.625	11.873	-0.248		11.312	10.062	6.937	11.585	10.115	7.445		11.562	10.187	7.812	11.583	10.243	7.691		11.562	9.75	7.25	11.581	10.128	7.475		11.687	11.875	11.687	11.705	11.847	11.895
11.5267	7.375	0	0	0		7.375	7.187	7.375	7.312	0.188			11.5267	11.571	-0.0442857		11.625	11.872	-0.247		11.312	10.062	6.937	11.585	10.114	7.445		11.562	10.187	7.812	11.582	10.243	7.69		11.562	9.75	7.25	11.58	10.127	7.474		11.687	11.937	11.625	11.705	11.847	11.895
11.5267	7.375	0	0	0		7.375	7.187	7.312	7.312	0.188			11.5267	11.57	-0.0432857		11.625	11.872	-0.247		11.312	10.062	6.937	11.584	10.113	7.445		11.562	10.187	7.812	11.582	10.242	7.69		11.562	9.75	7.25	11.58	10.126	7.474		11.687	11.937	11.687	11.704	11.847	11.894
11.5267	7.375	0	0	0		7.375	7.25	7.312	7.312	0.125			11.5267	11.569	-0.0422857		11.625	11.872	-0.247		11.25	10.062	6.937	11.583	10.112	7.445		11.562	10.187	7.812	11.581	10.241	7.689		11.562	9.75	7.25	11.579	10.125	7.473		11.687	11.875	11.687	11.704	11.846	11.894
11.5267	7.375	0	0	0		7.375	7.187	7.312	7.375	0.188			11.5267	11.569	-0.0422857		11.625	11.872	-0.247		11.312	10.062	7	11.583	10.111	7.445		11.562	10.187	7.812	11.581	10.24	7.688		11.562	9.75	7.25	11.579	10.124	7.473		11.687	11.937	11.625	11.703	11.846	11.894
11.5267	7.375	0	0	0		7.375	7.187	7.312	7.375	0.188			11.5267	11.568	-0.0412857		11.625	11.872	-0.247		11.25	10.062	7	11.582	10.111	7.444		11.562	10.187	7.812	11.58	10.239	7.688		11.562	9.75	7.187	11.578	10.123	7.472		11.687	11.875	11.687	11.703	11.846	11.894
11.5267	7.375	0	0	0		7.375	7.187	7.312	7.437	0.25			11.5267	11.568	-0.0412857		11.625	11.872	-0.247		11.312	10.062	7	11.582	10.11	7.444		11.562	10.187	7.812	11.58	10.238	7.687		11.562	9.75	7.25	11.577	10.122	7.472		11.687	11.937	11.687	11.702	11.846	11.894
11.5267	7.375	0	0	0		7.375	7.187	7.312	7.437	0.25			11.5267	11.567	-0.0402857		11.625	11.871	-0.246		11.312	10.062	7	11.581	10.109	7.444		11.562	10.187	7.812	11.579	10.237	7.686		11.562	9.75	7.25	11.577	10.121	7.471		11.687	11.875	11.625	11.702	11.845	11.894
11.5267	7.375	0	0	0		7.375	7.187	7.312	7.437	0.25			11.5267	11.567	-0.0402857		11.625	11.871	-0.246		11.312	10.062	7	11.581	10.108	7.444		11.562	10.187	7.812	11.579	10.236	7.685		11.562	9.75	7.187	11.576	10.12	7.471		11.687	11.937	11.687	11.702	11.845	11.894
11.5267	7.375	0	0	0		7.375	7.187	7.312	7.437	0.25			11.5267	11.566	-0.0392857		11.625	11.871	-0.246		11.312	10.062	7	11.58	10.107	7.444		11.562	10.187	7.812	11.578	10.235	7.685		11.562	9.75	7.187	11.576	10.119	7.47		11.687	11.937	11.625	11.701	11.845	11.893
11.5267	7.375	0	0	0		7.375	7.187	7.312	7.437	0.25			11.5267	11.566	-0.0392857		11.562	11.871	-0.309		11.312	10.062	7	11.58	10.106	7.444		11.562	10.187	7.812	11.578	10.235	7.684		11.562	9.75	7.187	11.575	10.119	7.47		11.687	11.875	11.687	11.701	11.845	11.893
11.5267	7.375	0	0	0		7.375	7.187	7.312	7.437	0.25			11.5267	11.565	-0.0382857		11.625	11.871	-0.246		11.312	10.062	7.062	11.579	10.105	7.443		11.562	10.187	7.75	11.577	10.234	7.683		11.562	9.75	7.187	11.575	10.118	7.469		11.687	11.937	11.687	11.7	11.844	11.893
11.5267	7.375	0	0	0		7.375	7.187	7.312	7.437	0.25			11.5267	11.565	-0.0382857		11.625	11.871	-0.246		11.312	10.062	7.062	11.579	10.104	7.443		11.562	10.187	7.812	11.577	10.233	7.682		11.562	9.75	7.187	11.574	10.117	7.468		11.687	11.875	11.687	11.7	11.844	11.893
11.5267	7.375	0	0	0		7.375	7.187	7.312	7.5	0.313			11.5267	11.564	-0.0372857		11.625	11.871	-0.246		11.25	10.062	7.062	11.578	10.103	7.443		11.562	10.125	7.75	11.576	10.232	7.682		11.562	9.75	7.187	11.574	10.116	7.468		11.687	11.937	11.687	11.699	11.844	11.893
11.5267	7.375	0	0	0		7.375	7.187	7.375	7.5	0.313			11.5267	11.564	-0.0372857		11.625	11.87	-0.245		11.312	10.062	7.062	11.577	10.102	7.443		11.562	10.187	7.812	11.575	10.231	7.681		11.562	9.75	7.25	11.573	10.115	7.467		11.687	11.875	11.687	11.699	11.843	11.893
11.5267	7.437	0	0	0		7.437	7.187	7.375	7.5	0.313			11.5267	11.563	-0.0362857		11.625	11.87	-0.245		11.312	10.062	7.062	11.577	10.101	7.443		11.562	10.187	7.75	11.575	10.23	7.68		11.562	9.75	7.25	11.573	10.114	7.467		11.687	11.875	11.625	11.698	11.843	11.893
11.5267	7.437	0	0	0		7.437	7.187	7.375	7.5	0.313			11.5267	11.563	-0.0362857		11.562	11.87	-0.308		11.312	10.062	7.125	11.576	10.1	7.442		11.562	10.187	7.75	11.574	10.229	7.679		11.562	9.75	7.25	11.572	10.113	7.466		11.687	11.875	11.625	11.698	11.843	11.892
11.5267	7.437	0	0	0		7.437	7.25	7.375	7.562	0.312			11.5267	11.562	-0.0352857		11.625	11.87	-0.245		11.25	10.062	7.125	11.576	10.099	7.442		11.562	10.187	7.75	11.574	10.228	7.679		11.562	9.75	7.25	11.571	10.112	7.466		11.687	11.875	11.625	11.697	11.843	11.892
11.5267	7.437	0	0	0		7.437	7.187	7.375	7.562	0.375			11.5267	11.562	-0.0352857		11.562	11.87	-0.308		11.312	10.062	7.125	11.575	10.099	7.442		11.562	10.187	7.75	11.573	10.227	7.678		11.562	9.75	7.25	11.571	10.111	7.465		11.687	11.875	11.625	11.697	11.842	11.892
11.5267	7.437	0	0	0		7.437	7.25	7.375	7.562	0.312			11.5267	11.561	-0.0342857		11.562	11.87	-0.308		11.25	10.062	7.125	11.575	10.098	7.442		11.562	10.187	7.75	11.573	10.227	7.677		11.562	9.75	7.25	11.57	10.11	7.465		11.687	11.875	11.625	11.696	11.842	11.892
11.5267	7.437	0	0	0		7.437	7.25	7.375	7.562	0.312			11.5267	11.56	-0.0332857		11.625	11.869	-0.244		11.25	10.062	7.187	11.574	10.097	7.442		11.562	10.187	7.75	11.572	10.226	7.676		11.562	9.75	7.25	11.57	10.109	7.464		11.687	11.875	11.625	11.696	11.842	11.892
11.5177	7.375	0	0	0		7.375	7.25	7.375	7.625	0.375			11.5177	11.56	-0.0422857		11.625	11.869	-0.244		11.312	10.062	7.187	11.574	10.096	7.442		11.562	10.125	7.75	11.572	10.225	7.676		11.562	9.75	7.25	11.569	10.108	7.464		11.687	11.937	11.625	11.695	11.841	11.892
11.5267	7.437	0	0	0		7.437	7.25	7.437	7.625	0.375			11.5267	11.559	-0.0322857		11.562	11.869	-0.307		11.312	10.062	7.187	11.573	10.095	7.441		11.562	10.187	7.75	11.571	10.224	7.675		11.562	9.75	7.25	11.569	10.107	7.463		11.687	11.937	11.625	11.695	11.841	11.892
11.5267	7.375	0	0	0		7.375	7.25	7.437	7.687	0.437			11.5267	11.559	-0.0322857		11.625	11.869	-0.244		11.25	10.062	7.187	11.573	10.094	7.441		11.562	10.125	7.75	11.571	10.223	7.674		11.562	9.75	7.312	11.568	10.107	7.463		11.687	11.875	11.687	11.694	11.841	11.892
11.5267	7.437	0	0	0		7.437	7.312	7.437	7.687	0.375			11.5267	11.558	-0.0312857		11.562	11.869	-0.307		11.312	10.062	7.25	11.572	10.093	7.441		11.562	10.187	7.75	11.57	10.222	7.673		11.562	9.75	7.25	11.568	10.106	7.462		11.687	11.875	11.687	11.694	11.841	11.891
11.5267	7.437	0	0	0		7.437	7.375	7.437	7.687	0.312			11.5267	11.558	-0.0312857		11.562	11.869	-0.307		11.25	10.062	7.25	11.572	10.092	7.443		11.562	10.125	7.75	11.57	10.221	7.673		11.562	9.75	7.25	11.567	10.105	7.463		11.687	11.875	11.625	11.693	11.84	11.891
11.5267	7.5	0	0	0		7.5	7.375	7.437	7.75	0.375			11.5267	11.557	-0.0302857		11.625	11.869	-0.244		11.312	10.062	7.25	11.571	10.091	7.446		11.562	10.187	7.75	11.569	10.22	7.673		11.562	9.75	7.312	11.567	10.104	7.465		11.687	11.937	11.687	11.693	11.84	11.891
11.5177	7.5	0	0	0		7.5	7.375	7.437	7.75	0.375			11.5177	11.557	-0.0392857		11.562	11.868	-0.306		11.25	10.062	7.312	11.57	10.09	7.449		11.562	10.125	7.75	11.569	10.219	7.673		11.562	9.75	7.312	11.566	10.103	7.467		11.687	11.875	11.625	11.692	11.84	11.891
11.5267	7.562	0	0	0		7.562	7.375	7.5	7.812	0.437			11.5267	11.556	-0.0292857		11.625	11.868	-0.243		11.312	10.062	7.312	11.57	10.089	7.451		11.562	10.187	7.75	11.568	10.219	7.673		11.562	9.75	7.312	11.566	10.102	7.469		11.687	11.875	11.625	11.692	11.84	11.891
11.5267	7.5	0	0	0		7.5	7.375	7.5	7.812	0.437			11.5267	11.556	-0.0292857		11.562	11.868	-0.306		11.312	10.062	7.312	11.569	10.088	7.454		11.562	10.125	7.75	11.567	10.218	7.672		11.562	9.75	7.312	11.565	10.101	7.471		11.687	11.875	11.625	11.691	11.839	11.891
11.5267	7.5	0	0	0		7.5	7.437	7.5	7.812	0.375			11.5267	11.555	-0.0282857		11.562	11.868	-0.306		11.312	10.062	7.312	11.569	10.088	7.457		11.562	10.125	7.75	11.567	10.217	7.672		11.562	9.75	7.312	11.564	10.1	7.473		11.687	11.875	11.687	11.691	11.839	11.89
11.5267	7.5	0	0	0		7.5	7.437	7.5	7.875	0.438			11.5267	11.555	-0.0282857		11.625	11.868	-0.243		11.25	10.062	7.375	11.568	10.087	7.459		11.562	10.125	7.75	11.566	10.216	7.672		11.562	9.75	7.312	11.564	10.099	7.474		11.687	11.937	11.625	11.69	11.839	11.89
11.5267	7.5	0	0	0		7.5	7.437	7.5	7.875	0.438			11.5267	11.555	-0.0282857		11.625	11.868	-0.243		11.25	10.062	7.375	11.568	10.086	7.462		11.562	10.125	7.75	11.566	10.215	7.672		11.562	9.75	7.375	11.563	10.098	7.476		11.687	11.875	11.625	11.69	11.838	11.89
11.5267	7.5	0	0	0		7.5	7.375	7.5	7.875	0.5			11.5267	11.554	-0.0272857		11.625	11.868	-0.243		11.312	10	7.437	11.567	10.085	7.465		11.562	10.125	7.75	11.565	10.214	7.672		11.562	9.75	7.375	11.563	10.097	7.478		11.687	11.875	11.625	11.689	11.838	11.89
11.5177	7.437	0	0	0		7.437	7.375	7.5	7.875	0.5			11.5177	11.554	-0.0362857		11.562	11.867	-0.305		11.312	10.062	7.437	11.567	10.084	7.468		11.562	10.125	7.75	11.565	10.213	7.672		11.562	9.75	7.375	11.562	10.097	7.48		11.687	11.937	11.625	11.689	11.838	11.89
11.5267	7.437	0	0	0		7.437	7.312	7.5	7.875	0.563			11.5267	11.553	-0.0262857		11.625	11.867	-0.242		11.25	10.062	7.437	11.566	10.083	7.47		11.562	10.125	7.75	11.564	10.212	7.672		11.562	9.75	7.375	11.562	10.096	7.482		11.687	11.937	11.687	11.688	11.838	11.89
11.5267	7.375	0	0	0		7.375	7.25	7.5	7.875	0.625			11.5267	11.553	-0.0262857		11.625	11.867	-0.242		11.25	10	7.437	11.566	10.082	7.473		11.562	10.125	7.75	11.564	10.211	7.671		11.562	9.75	7.375	11.561	10.095	7.484		11.687	11.875	11.625	11.688	11.837	11.89
11.5267	7.375	0	0	0		7.375	7.25	7.437	7.812	0.562			11.5267	11.552	-0.0252857		11.625	11.867	-0.242		11.312	10	7.437	11.565	10.081	7.476		11.562	10.125	7.75	11.563	10.211	7.671		11.562	9.75	7.375	11.561	10.094	7.485		11.687	11.937	11.625	11.688	11.837	11.889
11.5267	7.375	0	0	0		7.375	7.25	7.375	7.812	0.562			11.5267	11.552	-0.0252857		11.562	11.867	-0.305		11.312	10	7.5	11.565	10.08	7.479		11.562	10.125	7.75	11.563	10.21	7.671		11.562	9.75	7.375	11.56	10.093	7.487		11.687	11.937	11.687	11.687	11.837	11.889
11.5267	7.375	0	0	0		7.375	7.25	7.375	7.875	0.625			11.5267	11.551	-0.0242857		11.562	11.867	-0.305		11.25	10.062	7.437	11.564	10.08	7.481		11.562	10.125	7.75	11.562	10.209	7.671		11.562	9.75	7.375	11.56	10.092	7.489		11.687	11.875	11.625	11.687	11.836	11.889
11.5267	7.375	0	0	0		7.375	7.312	7.375	7.875	0.563			11.5267	11.551	-0.0242857		11.625	11.867	-0.242		11.25	10	7.5	11.563	10.079	7.484		11.562	10.125	7.75	11.562	10.208	7.671		11.562	9.75	7.375	11.559	10.091	7.491		11.687	11.875	11.625	11.686	11.836	11.889
11.5267	7.375	0	0	0		7.375	7.312	7.375	7.937	0.625			11.5267	11.55	-0.0232857		11.562	11.867	-0.305		11.312	10	7.5	11.563	10.078	7.487		11.562	10.125	7.75	11.561	10.207	7.671		11.562	9.75	7.375	11.559	10.09	7.493		11.687	11.875	11.625	11.686	11.836	11.889
11.5267	7.375	0	0	0		7.375	7.312	7.437	7.937	0.625			11.5267	11.55	-0.0232857		11.562	11.866	-0.304		11.25	10	7.5	11.562	10.077	7.49		11.562	10.125	7.75	11.561	10.206	7.671		11.562	9.75	7.375	11.558	10.089	7.495		11.687	11.875	11.625	11.685	11.836	11.889
11.5177	7.375	0	0	0		7.375	7.375	7.437	7.875	0.5			11.5177	11.549	-0.0312857		11.562	11.866	-0.304		11.312	10	7.5	11.562	10.076	7.492		11.562	10.125	7.75	11.56	10.205	7.67		11.562	9.75	7.375	11.557	10.088	7.496		11.687	11.937	11.625	11.685	11.835	11.889
11.5267	7.375	0	0	0		7.375	7.375	7.437	7.937	0.562			11.5267	11.549	-0.0222857		11.625	11.866	-0.241		11.25	10	7.5	11.561	10.075	7.495		11.562	10.125	7.75	11.559	10.204	7.67		11.562	9.75	7.375	11.557	10.088	7.498		11.687	11.937	11.625	11.684	11.835	11.889
11.5177	7.375	0	0	0		7.375	7.375	7.437	7.875	0.5			11.5177	11.548	-0.0302857		11.625	11.866	-0.241		11.25	10	7.5	11.561	10.074	7.498		11.562	10.125	7.75	11.559	10.203	7.67		11.562	9.75	7.375	11.556	10.087	7.5		11.687	11.875	11.625	11.684	11.835	11.888
11.5267	7.375	0	0	0		7.375	7.375	7.437	7.812	0.437			11.5267	11.548	-0.0212857		11.562	11.866	-0.304		11.25	10	7.562	11.56	10.073	7.5		11.562	10.125	7.75	11.558	10.203	7.67		11.562	9.75	7.375	11.556	10.086	7.502		11.687	11.937	11.625	11.683	11.834	11.888
11.5267	7.437	0	0	0		7.437	7.375	7.375	7.812	0.437			11.5267	11.547	-0.0202857		11.562	11.866	-0.304		11.25	10	7.562	11.56	10.072	7.503		11.562	10.125	7.75	11.558	10.202	7.67		11.562	9.75	7.375	11.555	10.085	7.504		11.687	11.875	11.625	11.683	11.834	11.888
11.5267	7.437	0	0	0		7.437	7.375	7.437	7.875	0.5			11.5267	11.547	-0.0202857		11.562	11.866	-0.304		11.25	10	7.562	11.559	10.071	7.506		11.562	10.125	7.75	11.557	10.201	7.67		11.562	9.75	7.375	11.555	10.084	7.506		11.687	11.875	11.687	11.682	11.834	11.888
11.5267	7.437	0	0	0		7.437	7.375	7.375	7.812	0.437			11.5267	11.546	-0.0192857		11.562	11.866	-0.304		11.25	10	7.562	11.559	10.071	7.509		11.562	10.125	7.75	11.557	10.2	7.669		11.562	9.75	7.375	11.554	10.083	7.507		11.687	11.875	11.625	11.682	11.834	11.888
11.5267	7.375	0	0	0		7.375	7.312	7.437	7.875	0.563			11.5267	11.546	-0.0192857		11.562	11.865	-0.303		11.25	10	7.562	11.558	10.07	7.511		11.562	10.125	7.75	11.556	10.199	7.669		11.562	9.75	7.375	11.554	10.082	7.509		11.687	11.875	11.625	11.681	11.833	11.888
11.5267	7.375	0	0	0		7.375	7.312	7.437	7.937	0.625			11.5267	11.545	-0.0182857		11.562	11.865	-0.303		11.312	10	7.562	11.557	10.069	7.514		11.562	10.125	7.75	11.556	10.198	7.669		11.562	9.75	7.375	11.553	10.081	7.511		11.687	11.875	11.625	11.681	11.833	11.888
11.5267	7.437	0	0	0		7.437	7.375	7.437	7.937	0.562			11.5267	11.545	-0.0182857		11.562	11.865	-0.303		11.25	10	7.625	11.557	10.068	7.517		11.562	10.125	7.75	11.555	10.197	7.669		11.562	9.75	7.375	11.553	10.08	7.513		11.687	11.875	11.625	11.68	11.833	11.887
11.5267	7.437	0	0	0		7.437	7.437	7.5	8	0.563			11.5267	11.544	-0.0172857		11.562	11.865	-0.303		11.25	10	7.625	11.556	10.067	7.52		11.562	10.125	7.75	11.555	10.196	7.669		11.562	9.75	7.437	11.552	10.079	7.515		11.687	11.875	11.625	11.68	11.832	11.887
11.5267	7.5	0	0	0		7.5	7.437	7.5	8	0.563			11.5267	11.544	-0.0172857		11.562	11.865	-0.303		11.25	10	7.625	11.556	10.066	7.522		11.562	10.125	7.75	11.554	10.195	7.669		11.562	9.75	7.437	11.551	10.078	7.517		11.687	11.875	11.625	11.679	11.832	11.887
11.5267	7.5	0	0	0		7.5	7.437	7.5	8	0.563			11.5267	11.543	-0.0162857		11.562	11.865	-0.303		11.25	10	7.625	11.555	10.065	7.525		11.562	10.125	7.75	11.554	10.195	7.669		11.562	9.75	7.437	11.551	10.078	7.518		11.687	11.875	11.625	11.679	11.832	11.887
11.5267	7.5	0	0	0		7.5	7.437	7.5	8	0.563			11.5267	11.543	-0.0162857		11.562	11.865	-0.303		11.25	10	7.687	11.555	10.064	7.528		11.562	10.125	7.75	11.553	10.194	7.668		11.562	9.75	7.437	11.55	10.077	7.52		11.687	11.875	11.625	11.678	11.832	11.887
11.5267	7.5	0	0	0		7.5	7.437	7.562	8.125	0.688			11.5267	11.543	-0.0162857		11.562	11.864	-0.302		11.25	10	7.687	11.554	10.063	7.53		11.562	10.125	7.75	11.553	10.193	7.668		11.562	9.75	7.437	11.55	10.076	7.522		11.687	11.875	11.625	11.678	11.831	11.887
11.5267	7.5	0	0	0		7.5	7.5	7.562	8.187	0.687			11.5267	11.542	-0.0152857		11.562	11.864	-0.302		11.25	10	7.687	11.554	10.063	7.536		11.562	10.125	7.75	11.552	10.192	7.669		11.562	9.75	7.437	11.549	10.075	7.526		11.687	11.875	11.625	11.677	11.831	11.887
11.5267	7.5	0	0	0		7.5	7.5	7.625	8.25	0.75			11.5267	11.542	-0.0152857		11.562	11.864	-0.302		11.25	10	7.75	11.553	10.062	7.541		11.562	10.125	7.75	11.551	10.191	7.67		11.562	9.687	7.437	11.549	10.074	7.53		11.687	11.875	11.625	11.677	11.831	11.886
11.5267	7.5	0	0	0		7.5	7.437	7.562	8.25	0.813			11.5267	11.541	-0.0142857		11.562	11.864	-0.302		11.25	10	7.75	11.553	10.061	7.538		11.562	10.125	7.75	11.551	10.19	7.67		11.562	9.75	7.5	11.548	10.073	7.532		11.687	11.875	11.625	11.676	11.83	11.886
11.5267	7.5	0	0	0		7.5	7.5	7.562	8.312	0.812			11.5267	11.541	-0.0142857		11.562	11.864	-0.302		11.25	10	7.812	11.552	10.06	7.538		11.562	10.125	7.75	11.55	10.189	7.67		11.562	9.687	7.5	11.548	10.072	7.533		11.687	11.875	11.625	11.676	11.83	11.886
11.5267	7.562	0	0	0		7.562	7.562	7.625	8.375	0.813			11.5267	11.54	-0.0132857		11.562	11.864	-0.302		11.25	10	7.812	11.552	10.059	7.561		11.562	10.125	7.75	11.55	10.188	7.67		11.562	9.75	7.5	11.547	10.071	7.539		11.687	11.875	11.625	11.676	11.83	11.886
11.5267	7.562	0	0	0		7.562	7.562	7.625	8.437	0.875			11.5267	11.54	-0.0132857		11.562	11.864	-0.302		11.25	10	7.812	11.551	10.058	7.586		11.562	10.125	7.75	11.549	10.188	7.67		11.562	9.75	7.5	11.547	10.07	7.544		11.687	11.875	11.625	11.675	11.83	11.886
11.5177	7.562	0	0	0		7.562	7.562	7.687	8.437	0.875			11.5177	11.54	-0.0222857		11.562	11.864	-0.302		11.25	10	7.875	11.55	10.057	7.58		11.562	10.125	7.75	11.549	10.187	7.67		11.562	9.75	7.5	11.546	10.07	7.545		11.687	11.875	11.625	11.675	11.829	11.886
11.5267	7.5	0	0	0		7.5	7.562	7.687	8.5	1			11.5267	11.539	-0.0122857		11.562	11.864	-0.302		11.25	10	7.875	11.55	10.056	7.571		11.562	10.125	7.75	11.548	10.186	7.67		11.562	9.75	7.562	11.546	10.069	7.546		11.687	11.875	11.625	11.674	11.829	11.886
11.5267	7.5	0	0	0		7.5	7.562	7.687	8.5	1			11.5267	11.538	-0.0112857		11.562	11.863	-0.301		11.25	10	7.937	11.549	10.055	7.562		11.562	10.125	7.75	11.548	10.185	7.67		11.562	9.75	7.562	11.545	10.068	7.547		11.687	11.875	11.625	11.674	11.829	11.885
11.5267	7.5	0	0	0		7.5	7.562	7.687	8.562	1.062			11.5267	11.538	-0.0112857		11.562	11.863	-0.301		11.25	10	7.937	11.549	10.055	7.553		11.562	10.125	7.75	11.547	10.184	7.67		11.562	9.75	7.562	11.544	10.067	7.548		11.687	11.875	11.625	11.673	11.828	11.885
11.5267	7.5	0	0	0		7.5	7.5	7.625	8.562	1.062			11.5267	11.537	-0.0102857		11.562	11.863	-0.301		11.25	10	8	11.548	10.054	7.562		11.562	10.125	7.75	11.547	10.183	7.67		11.562	9.687	7.562	11.544	10.066	7.552		11.687	11.875	11.625	11.673	11.828	11.885
11.5177	7.5	0	0	0		7.5	7.5	7.625	8.625	1.125			11.5177	11.537	-0.0192857		11.562	11.863	-0.301		11.25	10	8	11.548	10.053	7.576		11.562	10.125	7.75	11.546	10.182	7.671		11.562	9.687	7.562	11.543	10.065	7.557		11.687	11.875	11.625	11.672	11.828	11.885
11.5267	7.562	0	0	0		7.562	7.5	7.687	8.687	1.187			11.5267	11.537	-0.0102857		11.562	11.863	-0.301		11.25	10	8.062	11.547	10.052	7.589		11.562	10.125	7.75	11.546	10.181	7.671		11.562	9.687	7.562	11.543	10.064	7.561		11.687	11.875	11.625	11.672	11.828	11.885
11.5177	7.562	0	0	0		7.562	7.5	7.687	8.625	1.125			11.5177	11.536	-0.0182857		11.562	11.863	-0.301		11.25	10	8.062	11.547	10.051	7.603		11.562	10.125	7.75	11.545	10.18	7.671		11.562	9.687	7.562	11.542	10.063	7.566		11.687	11.875	11.625	11.671	11.827	11.885
11.5177	7.562	0	0	0		7.562	7.562	7.687	8.625	1.063			11.5177	11.536	-0.0182857		11.562	11.863	-0.301		11.25	10	8.125	11.546	10.05	7.609		11.562	10.125	7.75	11.545	10.18	7.671		11.562	9.75	7.562	11.542	10.062	7.57		11.687	11.875	11.625	11.671	11.827	11.885
11.5267	7.562	0	0	0		7.562	7.562	7.687	8.687	1.125			11.5267	11.535	-0.00828571		11.562	11.863	-0.301		11.25	10	8.125	11.546	10.049	7.611		11.562	10.125	7.75	11.544	10.179	7.672		11.562	9.687	7.625	11.541	10.062	7.573		11.687	11.875	11.625	11.67	11.827	11.884
11.5177	7.562	0	0	0		7.562	7.562	7.687	8.687	1.125			11.5177	11.535	-0.0172857		11.562	11.863	-0.301		11.25	10	8.125	11.545	10.048	7.613		11.562	10.125	7.75	11.543	10.178	7.672		11.562	9.687	7.625	11.541	10.061	7.577		11.687	11.875	11.625	11.67	11.826	11.884
11.5267	7.562	0	0	0		7.562	7.5	7.687	8.75	1.25			11.5267	11.534	-0.00728571		11.562	11.862	-0.3		11.25	10	8.187	11.544	10.048	7.616		11.562	10.125	7.75	11.543	10.177	7.673		11.562	9.687	7.625	11.54	10.06	7.58		11.687	11.875	11.625	11.669	11.826	11.884
11.5177	7.5	0	0	0		7.5	7.562	7.687	8.75	1.25			11.5177	11.534	-0.0162857		11.562	11.862	-0.3		11.25	10	8.187	11.544	10.047	7.618		11.562	10.125	7.75	11.542	10.176	7.673		11.562	9.687	7.625	11.54	10.059	7.584		11.687	11.875	11.625	11.669	11.826	11.884
11.5087	7.562	0	0	0		7.562	7.562	7.687	8.812	1.25			11.5087	11.534	-0.0252857		11.562	11.862	-0.3		11.25	10	8.187	11.543	10.046	7.62		11.562	10.125	7.75	11.542	10.175	7.674		11.562	9.687	7.625	11.539	10.058	7.587		11.687	11.875	11.625	11.668	11.826	11.884
11.5267	7.625	0	0	0		7.625	7.625	7.75	8.812	1.187			11.5267	11.533	-0.00628571		11.562	11.862	-0.3		11.25	10	8.25	11.543	10.045	7.623		11.562	10.125	7.75	11.541	10.174	7.674		11.562	9.687	7.625	11.539	10.057	7.591		11.687	11.875	11.625	11.668	11.825	11.884
11.5177	7.625	0	0	0		7.625	7.687	7.75	8.812	1.187			11.5177	11.533	-0.0152857		11.562	11.862	-0.3		11.25	10	8.25	11.542	10.044	7.625		11.562	10.125	7.75	11.541	10.173	7.675		11.562	9.75	7.625	11.538	10.056	7.594		11.687	11.875	11.625	11.667	11.825	11.884
11.5177	7.625	0	0	0		7.625	7.687	7.812	8.875	1.25			11.5177	11.532	-0.0142857		11.562	11.862	-0.3		11.25	10	8.25	11.542	10.043	7.627		11.562	10.125	7.75	11.54	10.172	7.675		11.562	9.687	7.687	11.537	10.055	7.597		11.687	11.875	11.625	11.667	11.825	11.883
11.5267	7.625	0	0	0		7.625	7.687	7.875	8.937	1.312			11.5267	11.532	-0.00528571		11.562	11.862	-0.3		11.25	10	8.312	11.541	10.042	7.627		11.562	10.125	7.75	11.54	10.172	7.676		11.562	9.687	7.687	11.537	10.054	7.599		11.687	11.875	11.625	11.666	11.824	11.883
11.5267	7.625	0	0	0		7.625	7.687	7.812	9	1.375			11.5267	11.531	-0.00428571		11.562	11.862	-0.3		11.25	10	8.312	11.541	10.041	7.627		11.562	10.125	7.75	11.539	10.171	7.677		11.562	9.687	7.687	11.536	10.054	7.601		11.687	11.875	11.625	11.666	11.824	11.883
11.5267	7.687	0	0	0		7.687	7.75	7.812	9	1.313			11.5267	11.531	-0.00428571		11.562	11.861	-0.299		11.25	10	8.375	11.54	10.041	7.628		11.562	10.125	7.75	11.539	10.17	7.677		11.562	9.687	7.687	11.536	10.053	7.603		11.687	11.875	11.625	11.665	11.824	11.883
11.5177	7.687	0	0	0		7.687	7.75	7.812	9.062	1.375			11.5177	11.53	-0.0122857		11.562	11.861	-0.299		11.25	10	8.375	11.54	10.04	7.628		11.562	10.125	7.75	11.538	10.169	7.678		11.562	9.687	7.687	11.535	10.052	7.605		11.687	11.875	11.625	11.665	11.824	11.883
11.5177	7.625	0	0	0		7.625	7.687	7.875	9.062	1.437			11.5177	11.53	-0.0122857		11.562	11.861	-0.299		11.25	10	8.437	11.539	10.039	7.629		11.562	10.125	7.75	11.538	10.168	7.679		11.562	9.687	7.687	11.535	10.051	7.608		11.687	11.875	11.625	11.664	11.823	11.883
11.5267	7.625	0	0	0		7.625	7.687	7.812	9.125	1.5			11.5267	11.529	-0.00228571		11.562	11.861	-0.299		11.25	10	8.437	11.539	10.038	7.629		11.562	10.125	7.687	11.537	10.167	7.679		11.562	9.687	7.75	11.534	10.05	7.61		11.687	11.875	11.625	11.664	11.823	11.882
11.5177	7.562	0	0	0		7.562	7.625	7.75	9.125	1.563			11.5177	11.529	-0.0112857		11.562	11.861	-0.299		11.25	10	8.5	11.538	10.037	7.63		11.562	10.125	7.687	11.537	10.166	7.68		11.562	9.687	7.75	11.534	10.049	7.612		11.687	11.875	11.625	11.664	11.823	11.882
11.5267	7.625	0	0	0		7.625	7.687	7.75	9.187	1.562			11.5267	11.528	-0.00128571		11.562	11.861	-0.299		11.25	10	8.5	11.538	10.036	7.63		11.562	10.125	7.75	11.536	10.165	7.681		11.562	9.687	7.75	11.533	10.048	7.614		11.687	11.875	11.625	11.663	11.822	11.882
11.5267	7.625	0	0	0		7.625	7.687	7.812	9.187	1.562			11.5267	11.528	-0.00128571		11.562	11.861	-0.299		11.25	10	8.5	11.537	10.035	7.643		11.562	10.125	7.75	11.536	10.165	7.681		11.562	9.687	7.75	11.533	10.047	7.618		11.687	11.875	11.625	11.663	11.822	11.882
11.5087	7.687	0	0	0		7.687	7.75	7.812	9.187	1.5			11.5087	11.528	-0.0192857		11.562	11.861	-0.299		11.25	10	8.562	11.536	10.035	7.67		11.562	10.125	7.75	11.535	10.164	7.682		11.562	9.687	7.75	11.532	10.047	7.623		11.687	11.875	11.625	11.662	11.822	11.882
11.5087	7.687	0	0	0		7.687	7.812	7.875	9.187	1.5			11.5087	11.527	-0.0182857		11.562	11.861	-0.299		11.25	10	8.562	11.536	10.034	7.681		11.562	10.125	7.75	11.534	10.163	7.683		11.562	9.687	7.812	11.532	10.046	7.63		11.687	11.875	11.625	11.662	11.822	11.882
11.5087	7.75	0	0	0		7.75	7.812	7.875	9.187	1.437			11.5087	11.527	-0.0182857		11.562	11.861	-0.299		11.25	10	8.625	11.535	10.033	7.69		11.562	10.125	7.75	11.534	10.162	7.684		11.562	9.687	7.812	11.531	10.045	7.636		11.687	11.875	11.625	11.661	11.821	11.882
11.5267	7.687	0	0	0		7.687	7.75	7.875	9.312	1.625			11.5267	11.527	-0.000285714		11.562	11.861	-0.299		11.25	10	8.625	11.535	10.032	7.699		11.562	10.125	7.75	11.533	10.161	7.685		11.562	9.687	7.812	11.53	10.044	7.642		11.687	11.875	11.625	11.661	11.821	11.881
11.5087	7.687	0	0	0		7.687	7.75	7.875	9.312	1.625			11.5087	11.526	-0.0172857		11.562	11.861	-0.299		11.25	10	8.687	11.534	10.031	7.708		11.562	10.125	7.75	11.533	10.16	7.686		11.562	9.687	7.812	11.53	10.043	7.648		11.687	11.875	11.625	11.66	11.821	11.881
11.5267	7.687	0	0	0		7.687	7.75	7.875	9.312	1.625			11.5267	11.526	0.000714286		11.562	11.86	-0.298		11.25	10	8.687	11.534	10.03	7.719		11.562	10.125	7.75	11.532	10.159	7.687		11.562	9.687	7.812	11.529	10.042	7.656		11.687	11.875	11.625	11.66	11.82	11.881
11.5177	7.625	0	0	0		7.625	7.687	7.812	9.25	1.625			11.5177	11.525	-0.00728571		11.562	11.86	-0.298		11.25	10	8.687	11.533	10.029	7.73		11.562	10.125	7.75	11.532	10.158	7.688		11.562	9.687	7.812	11.529	10.041	7.664		11.687	11.875	11.625	11.659	11.82	11.881
11.5177	7.625	0	0	0		7.625	7.75	7.812	9.312	1.687			11.5177	11.525	-0.00728571		11.562	11.86	-0.298		11.25	10	8.75	11.533	10.029	7.742		11.562	10.125	7.75	11.531	10.158	7.69		11.562	9.687	7.812	11.528	10.041	7.672		11.687	11.875	11.625	11.659	11.82	11.881
11.5087	7.625	0	0	0		7.625	7.75	7.875	9.312	1.687			11.5087	11.525	-0.0162857		11.562	11.86	-0.298		11.25	10	8.75	11.532	10.028	7.753		11.562	10.125	7.75	11.531	10.157	7.691		11.562	9.687	7.812	11.528	10.04	7.68		11.687	11.875	11.625	11.658	11.82	11.881
11.5087	7.625	0	0	0		7.625	7.75	7.875	9.375	1.75			11.5087	11.524	-0.0152857		11.562	11.86	-0.298		11.25	10	8.812	11.532	10.027	7.764		11.562	10.125	7.75	11.53	10.156	7.692		11.562	9.687	7.812	11.527	10.039	7.689		11.687	11.875	11.625	11.658	11.819	11.881
11.5087	7.687	0	0	0		7.687	7.812	7.937	9.25	1.563			11.5087	11.524	-0.0152857		11.562	11.86	-0.298		11.25	10	8.812	11.531	10.026	7.775		11.562	10.125	7.75	11.53	10.155	7.694		11.562	9.687	7.812	11.527	10.038	7.697		11.687	11.875	11.625	11.657	11.819	11.88
11.5177	7.75	0	0	0		7.75	7.875	7.875	9.187	1.437			11.5177	11.524	-0.00628571		11.562	11.86	-0.298		11.25	10	8.812	11.531	10.025	7.786		11.562	10.125	7.75	11.529	10.154	7.695		11.562	9.687	7.875	11.526	10.037	7.705		11.687	11.875	11.625	11.657	11.819	11.88
11.5177	7.75	0	0	0		7.75	7.875	7.875	9.125	1.375			11.5177	11.523	-0.00528571		11.562	11.86	-0.298		11.25	10	8.875	11.53	10.024	7.798		11.562	10.125	7.75	11.529	10.153	7.696		11.562	9.687	7.875	11.526	10.036	7.713		11.687	11.875	11.625	11.656	11.818	11.88
11.5177	7.812	0	0	0		7.812	7.937	7.875	9.187	1.375			11.5177	11.523	-0.00528571		11.562	11.86	-0.298		11.25	10	8.875	11.529	10.024	7.809		11.562	10.125	7.75	11.528	10.152	7.698		11.562	9.687	7.875	11.525	10.035	7.722		11.687	11.875	11.625	11.656	11.818	11.88
11.5087	7.875	0	0	0		7.875	8	7.875	9.187	1.312			11.5087	11.523	-0.0142857		11.562	11.86	-0.298		11.25	10	8.937	11.529	10.023	7.821		11.562	10.125	7.75	11.528	10.151	7.7		11.562	9.687	7.875	11.525	10.035	7.731		11.687	11.875	11.625	11.655	11.818	11.88
11.5267	7.875	0	0	0		7.875	7.937	7.937	9.312	1.437			11.5267	11.522	0.00471429		11.562	11.86	-0.298		11.25	10	8.937	11.528	10.022	7.832		11.562	10.125	7.75	11.527	10.151	7.702		11.562	9.687	7.875	11.524	10.034	7.741		11.687	11.875	11.625	11.655	11.817	11.88
11.5087	7.812	0	0	0		7.812	7.937	7.875	9.5	1.688			11.5087	11.522	-0.0132857		11.562	11.86	-0.298		11.25	10	9	11.528	10.021	7.844		11.562	10.062	7.75	11.527	10.15	7.704		11.562	9.687	7.875	11.524	10.033	7.75		11.687	11.875	11.625	11.655	11.817	11.88
11.5177	7.75	0	0	0		7.75	7.937	7.875	9.625	1.875			11.5177	11.522	-0.00428571		11.562	11.86	-0.298		11.25	10	9	11.527	10.02	7.855		11.562	10.125	7.75	11.526	10.149	7.706		11.562	9.687	7.875	11.523	10.032	7.759		11.687	11.875	11.625	11.654	11.817	11.879
11.5267	7.812	0	0	0		7.812	7.937	7.937	9.687	1.875			11.5267	11.522	0.00471429		11.562	11.86	-0.298		11.25	10	9.062	11.527	10.019	7.867		11.5	10.125	7.75	11.526	10.148	7.708		11.562	9.687	7.937	11.522	10.031	7.769		11.687	11.875	11.625	11.654	11.817	11.879
11.5177	7.812	0	0	0		7.812	8	7.937	9.5	1.688			11.5177	11.521	-0.00328571		11.562	11.86	-0.298		11.25	10	9.062	11.526	10.019	7.879		11.5	10.125	7.75	11.525	10.147	7.71		11.562	9.687	7.937	11.522	10.03	7.778		11.687	11.875	11.625	11.653	11.816	11.879
11.5177	7.875	0	0	0		7.875	8	7.937	9.5	1.625			11.5177	11.521	-0.00328571		11.562	11.86	-0.298		11.25	10	9.125	11.526	10.018	7.89		11.562	10.125	7.75	11.524	10.146	7.712		11.562	9.687	7.937	11.521	10.029	7.788		11.687	11.875	11.625	11.653	11.816	11.879
11.5177	7.875	0	0	0		7.875	8	8	9.625	1.75			11.5177	11.52	-0.00228571		11.562	11.86	-0.298		11.25	10	9.125	11.525	10.017	7.895		11.5	10.125	7.75	11.524	10.145	7.714		11.562	9.687	7.937	11.521	10.029	7.794		11.687	11.875	11.625	11.652	11.816	11.879
11.5087	7.812	0	0	0		7.812	7.812	8	9.625	1.813			11.5087	11.52	-0.0112857		11.562	11.86	-0.298		11.25	10	9.187	11.525	10.016	7.891		11.562	10.125	7.75	11.523	10.144	7.716		11.562	9.687	7.937	11.52	10.028	7.795		11.687	11.875	11.625	11.652	11.815	11.879
11.5087	7.687	0	0	0		7.687	7.687	7.875	9.562	1.875			11.5087	11.519	-0.0102857		11.562	11.86	-0.298		11.25	10	9.187	11.524	10.015	7.887		11.562	10.125	7.75	11.523	10.144	7.718		11.562	9.687	7.937	11.52	10.027	7.796		11.687	11.875	11.625	11.651	11.815	11.879
11.5087	7.687	0	0	0		7.687	7.75	7.812	9.5	1.813			11.5087	11.519	-0.0102857		11.562	11.86	-0.298		11.25	10	9.187	11.524	10.015	7.882		11.562	10.062	7.75	11.522	10.143	7.72		11.562	9.687	7.937	11.519	10.026	7.797		11.687	11.875	11.625	11.651	11.815	11.878
11.5089	7.75	0	0	0		7.75	7.875	7.875	9.562	1.812			11.5089	11.518	-0.00914286		11.562	11.859	-0.297		11.25	10	9.187	11.523	10.014	7.878		11.562	10.062	7.75	11.522	10.142	7.722		11.562	9.687	7.937	11.519	10.025	7.799		11.687	11.875	11.625	11.65	11.815	11.878
11.5087	7.812	0	0	0		7.812	7.937	7.812	9.312	1.5			11.5087	11.518	-0.00928571		11.562	11.859	-0.297		11.25	10	9.187	11.523	10.013	7.874		11.562	10.062	7.75	11.521	10.141	7.724		11.562	9.687	7.937	11.518	10.025	7.8		11.687	11.875	11.625	11.65	11.814	11.878
11.5087	7.812	0	0	0		7.812	7.875	7.875	9.437	1.625			11.5087	11.517	-0.00828571		11.562	11.859	-0.297		11.25	10	9.187	11.522	10.012	7.87		11.562	10.125	7.75	11.521	10.14	7.726		11.562	9.687	7.937	11.518	10.024	7.801		11.687	11.875	11.625	11.649	11.814	11.878
11.5177	7.812	0	0	0		7.812	7.875	7.812	9.25	1.438			11.5177	11.517	0.000714286		11.562	11.859	-0.297		11.25	10	9.25	11.521	10.011	7.865		11.5	10.062	7.75	11.52	10.139	7.729		11.562	9.687	7.937	11.517	10.023	7.803		11.687	11.875	11.625	11.649	11.814	11.878
11.4999	7.812	0	0	0		7.812	7.875	7.812	9.375	1.563			11.4999	11.516	-0.0161429		11.562	11.859	-0.297		11.25	10	9.25	11.521	10.011	7.861		11.5	10.125	7.75	11.52	10.138	7.731		11.562	9.687	7.937	11.517	10.022	7.804		11.687	11.875	11.625	11.648	11.813	11.878
11.5087	7.75	0	0	0		7.75	7.875	7.937	9.562	1.812			11.5087	11.516	-0.00728571		11.562	11.859	-0.297		11.25	10	9.25	11.52	10.01	7.857		11.562	10.062	7.75	11.519	10.138	7.733		11.562	9.687	7.937	11.516	10.021	7.805		11.687	11.875	11.625	11.648	11.813	11.878
11.4999	7.687	0	0	0		7.687	7.75	7.937	9.75	2.063			11.4999	11.515	-0.0151429		11.562	11.859	-0.297		11.25	10	9.25	11.52	10.009	7.853		11.562	10.125	7.75	11.519	10.137	7.735		11.562	9.687	7.937	11.516	10.02	7.807		11.687	11.875	11.625	11.648	11.813	11.877
11.5087	7.687	0	0	0		7.687	7.75	7.875	9.875	2.188			11.5087	11.515	-0.00628571		11.562	11.859	-0.297		11.25	10	9.312	11.519	10.008	7.848		11.5	10.062	7.75	11.518	10.136	7.737		11.562	9.687	7.937	11.515	10.02	7.808		11.687	11.875	11.625	11.647	11.813	11.877
11.5087	7.75	0	0	0		7.75	7.812	7.875	9.875	2.125			11.5087	11.514	-0.00528571		11.562	11.859	-0.297		11.25	10	9.312	11.519	10.007	7.844		11.562	10.125	7.75	11.518	10.135	7.739		11.562	9.687	7.937	11.515	10.019	7.809		11.687	11.875	11.625	11.647	11.812	11.877
11.5177	7.687	0	0	0		7.687	7.812	7.875	9.937	2.25			11.5177	11.514	0.00371429		11.562	11.859	-0.297		11.25	10	9.375	11.518	10.007	7.84		11.5	10.062	7.75	11.517	10.134	7.741		11.562	9.687	8	11.514	10.018	7.81		11.687	11.875	11.625	11.646	11.812	11.877
11.5087	7.625	0	0	0		7.625	7.812	7.937	10	2.375			11.5087	11.513	-0.00428571		11.562	11.859	-0.297		11.25	10	9.375	11.518	10.006	7.835		11.562	10.125	7.75	11.517	10.133	7.743		11.562	9.687	8	11.514	10.017	7.812		11.687	11.875	11.625	11.646	11.812	11.877
11.5087	7.687	0	0	0		7.687	7.875	8	10	2.313			11.5087	11.513	-0.00428571		11.562	11.859	-0.297		11.25	10	9.437	11.517	10.005	7.831		11.562	10.062	7.75	11.516	10.132	7.746		11.562	9.687	8	11.513	10.016	7.813		11.687	11.875	11.625	11.645	11.811	11.877
11.5087	7.75	0	0	0		7.75	7.937	8	10.125	2.375			11.5087	11.512	-0.00328571		11.562	11.858	-0.296		11.25	10	9.437	11.517	10.004	7.827		11.562	10.062	7.75	11.516	10.132	7.748		11.562	9.687	8	11.513	10.016	7.814		11.687	11.875	11.625	11.645	11.811	11.877
11.5087	7.75	0	0	0		7.75	7.875	8.062	10.25	2.5			11.5087	11.512	-0.00328571		11.562	11.858	-0.296		11.25	10	9.5	11.516	10.003	7.827		11.562	10.125	7.75	11.515	10.131	7.75		11.562	9.687	8	11.512	10.015	7.815		11.687	11.875	11.625	11.644	11.811	11.876
11.5177	7.75	0	0	0		7.75	7.812	8	10.25	2.5			11.5177	11.511	0.00671429		11.562	11.858	-0.296		11.25	10	9.5	11.516	10.003	7.827		11.5	10.062	7.75	11.515	10.13	7.751		11.562	9.687	8	11.511	10.014	7.816		11.687	11.875	11.625	11.644	11.81	11.876
11.5087	7.75	0	0	0		7.75	7.812	7.937	10.25	2.5			11.5087	11.511	-0.00228571		11.562	11.858	-0.296		11.25	10	9.5	11.515	10.002	7.827		11.5	10.062	7.75	11.514	10.129	7.753		11.562	9.687	8	11.511	10.013	7.816		11.687	11.875	11.625	11.643	11.81	11.876
11.5087	7.687	0	0	0		7.687	7.75	7.937	10.312	2.625			11.5087	11.51	-0.00128571		11.562	11.858	-0.296		11.25	10	9.562	11.515	10.001	7.827		11.5	10.062	7.75	11.514	10.128	7.755		11.562	9.687	8	11.51	10.012	7.817		11.687	11.875	11.625	11.643	11.81	11.876
11.5087	7.687	0	0	0		7.687	7.812	7.875	10.25	2.563			11.5087	11.51	-0.00128571		11.562	11.858	-0.296		11.25	10	9.562	11.514	10	7.785		11.5	10.062	7.75	11.513	10.127	7.757		11.5	9.687	8	11.51	10.012	7.815		11.687	11.875	11.625	11.642	11.81	11.876
11.5087	7.687	0	0	0		7.687	7.75	7.875	10.187	2.5			11.5087	11.509	-0.000285714		11.562	11.858	-0.296		11.25	10	9.562	11.514	10	7.763		11.5	10.062	7.75	11.513	10.126	7.759		11.562	9.687	8	11.509	10.011	7.81		11.687	11.875	11.625	11.642	11.809	11.876
11.5087	7.625	0	0	0		7.625	7.812	7.875	10.125	2.5			11.5087	11.508	0.000714286		11.562	11.858	-0.296		11.25	10	9.562	11.513	9.999	7.726		11.5	10.062	7.75	11.512	10.126	7.762		11.5	9.687	8	11.509	10.01	7.804		11.687	11.875	11.625	11.642	11.809	11.876
11.4999	7.687	0	0	0		7.687	7.812	7.875	10.062	2.375			11.4999	11.508	-0.00814286		11.562	11.857	-0.295		11.25	10	9.5	11.513	9.998	7.718		11.562	10.062	7.75	11.512	10.125	7.764		11.562	9.687	8	11.508	10.009	7.797		11.687	11.875	11.625	11.641	11.809	11.876
11.4997	7.75	0	0	0		7.75	7.937	7.937	10.062	2.312			11.4997	11.507	-0.00728571		11.562	11.857	-0.295		11.25	10	9.5	11.512	9.997	7.746		11.562	10.062	7.75	11.511	10.124	7.766		11.562	9.687	8	11.508	10.008	7.797		11.687	11.875	11.625	11.641	11.808	11.875
11.4909	7.812	0	0	0		7.812	8	8	10.125	2.313			11.4909	11.507	-0.0161429		11.562	11.858	-0.296		11.25	10	9.562	11.511	9.997	7.774		11.5	10.125	7.812	11.511	10.123	7.767		11.562	9.687	8	11.507	10.008	7.797		11.687	11.875	11.625	11.64	11.808	11.875
11.5087	7.812	0	0	0		7.812	8	8.062	10.125	2.313			11.5087	11.507	0.00171429		11.562	11.857	-0.295		11.25	10	9.562	11.511	9.996	7.784		11.5	10.062	7.75	11.51	10.122	7.769		11.5	9.687	8.062	11.507	10.007	7.799		11.687	11.875	11.625	11.64	11.808	11.875
11.5087	7.812	0	0	0		7.812	8.062	8.062	10.062	2.25			11.5087	11.506	0.00271429		11.562	11.857	-0.295		11.25	10	9.562	11.51	9.995	7.793		11.5	10.062	7.75	11.51	10.121	7.771		11.5	9.687	8.062	11.506	10.006	7.8		11.687	11.875	11.625	11.639	11.808	11.875
11.5087	7.875	0	0	0		7.875	8.125	8.062	9.875	2			11.5087	11.506	0.00271429		11.562	11.857	-0.295		11.25	10	9.562	11.51	9.994	7.801		11.5	10.062	7.75	11.509	10.12	7.773		11.562	9.687	8.062	11.506	10.005	7.802		11.687	11.875	11.625	11.639	11.807	11.875
11.5087	7.75	0	0	0		7.75	8.062	8.062	10.062	2.312			11.5087	11.505	0.00371429		11.562	11.857	-0.295		11.25	10	9.625	11.509	9.993	7.809		11.5	10.062	7.812	11.509	10.12	7.775		11.562	9.687	8.062	11.505	10.005	7.804		11.687	11.875	11.625	11.638	11.807	11.875
11.5087	7.812	0	0	0		7.812	8	8.062	10.125	2.313			11.5087	11.505	0.00371429		11.562	11.857	-0.295		11.25	10	9.625	11.509	9.993	7.82		11.5	10.062	7.812	11.508	10.119	7.776		11.5	9.687	8.125	11.505	10.004	7.809		11.687	11.875	11.625	11.638	11.807	11.875
11.5087	7.875	0	0	0		7.875	8.062	8.125	10.062	2.187			11.5087	11.505	0.00371429		11.562	11.857	-0.295		11.25	10	9.625	11.508	9.992	7.831		11.5	10.062	7.812	11.508	10.118	7.778		11.5	9.687	8.125	11.504	10.003	7.814		11.687	11.875	11.625	11.637	11.806	11.874
11.5087	7.937	0	0	0		7.937	8.125	8.187	10.125	2.188			11.5087	11.504	0.00471429		11.562	11.857	-0.295		11.25	10	9.625	11.508	9.991	7.842		11.5	10.062	7.812	11.507	10.117	7.78		11.562	9.687	8.125	11.504	10.002	7.82		11.687	11.875	11.625	11.637	11.806	11.874
11.5087	7.875	0	0	0		7.875	8.062	8.187	10.125	2.25			11.5087	11.504	0.00471429		11.562	11.857	-0.295		11.25	10	9.687	11.507	9.991	7.853		11.5	10.062	7.812	11.507	10.116	7.782		11.5	9.687	8.125	11.503	10.001	7.825		11.687	11.875	11.625	11.636	11.806	11.874
11.4909	7.812	0	0	0		7.812	8	8.125	10.187	2.375			11.4909	11.504	-0.0131429		11.562	11.857	-0.295		11.25	10	9.687	11.507	9.99	7.864		11.5	10.062	7.812	11.506	10.115	7.784		11.5	9.687	8.187	11.503	10.001	7.83		11.687	11.875	11.625	11.636	11.805	11.874
11.5087	7.875	0	0	0		7.875	8.125	8.187	10.062	2.187			11.5087	11.503	0.00571429		11.562	11.857	-0.295		11.25	10	9.687	11.506	9.989	7.875		11.5	10.062	7.812	11.506	10.115	7.785		11.5	9.687	8.125	11.502	10	7.836		11.687	11.875	11.625	11.636	11.805	11.874
11.4999	7.937	0	0	0		7.937	8.062	8.125	10.062	2.125			11.4999	11.503	-0.00314286		11.562	11.857	-0.295		11.25	10	9.687	11.506	9.988	7.886		11.5	10.062	7.812	11.505	10.114	7.787		11.5	9.687	8.187	11.502	9.999	7.841		11.687	11.875	11.625	11.635	11.805	11.874
11.4997	7.937	0	0	0		7.937	8.062	8.125	10.062	2.125			11.4997	11.503	-0.00328571		11.562	11.857	-0.295		11.25	10	9.687	11.505	9.988	7.897		11.5	10.062	7.812	11.504	10.113	7.789		11.562	9.687	8.187	11.501	9.998	7.847		11.687	11.875	11.625	11.635	11.805	11.874
11.5087	7.875	0	0	0		7.875	8	8.062	10.125	2.25			11.5087	11.502	0.00671429		11.562	11.857	-0.295		11.25	10	9.687	11.505	9.987	7.902		11.562	10.062	7.812	11.504	10.112	7.791		11.5	9.687	8.187	11.501	9.998	7.851		11.687	11.875	11.625	11.634	11.804	11.873
11.4997	7.875	0	0	0		7.875	8.062	8	10	2.125			11.4997	11.502	-0.00228571		11.562	11.857	-0.295		11.25	10	9.687	11.504	9.986	7.905		11.5	10.062	7.812	11.503	10.111	7.793		11.5	9.687	8.187	11.5	9.997	7.854		11.687	11.875	11.625	11.634	11.804	11.873
11.4907	7.937	0	0	0		7.937	8.062	7.937	9.687	1.75			11.4907	11.501	-0.0102857		11.562	11.857	-0.295		11.25	10	9.687	11.504	9.985	7.907		11.5	10.062	7.812	11.503	10.11	7.795		11.5	9.687	8.187	11.499	9.996	7.858		11.687	11.875	11.625	11.633	11.804	11.873
11.5177	7.937	0	0	0		7.937	8.125	8.062	9.937	2			11.5177	11.501	0.0167143		11.562	11.857	-0.295		11.25	10	9.687	11.503	9.985	7.909		11.5	10.062	7.812	11.502	10.11	7.797		11.5	9.687	8.187	11.499	9.995	7.861		11.687	11.875	11.625	11.633	11.803	11.873
11.5087	7.937	0	0	0		7.937	8.125	8.062	10.125	2.188			11.5087	11.5	0.00871429		11.562	11.857	-0.295		11.25	10	9.687	11.503	9.984	7.912		11.5	10.062	7.812	11.502	10.109	7.799		11.5	9.687	8.187	11.498	9.995	7.864		11.687	11.875	11.625	11.632	11.803	11.873
11.5087	7.812	0	0	0		7.812	8	8.062	10.25	2.438			11.5087	11.5	0.00871429		11.562	11.857	-0.295		11.25	10	9.75	11.502	9.983	7.914		11.5	10.062	7.812	11.501	10.108	7.801		11.562	9.687	8.187	11.498	9.994	7.868		11.687	11.875	11.625	11.632	11.803	11.873
11.5087	7.812	0	0	0		7.812	8.062	8.062	10.375	2.563			11.5087	11.5	0.00871429		11.562	11.857	-0.295		11.25	10	9.75	11.502	9.983	7.916		11.5	10.062	7.812	11.501	10.107	7.803		11.5	9.687	8.187	11.497	9.993	7.871		11.687	11.875	11.625	11.631	11.803	11.873
11.4997	7.875	0	0	0		7.875	8.062	8.125	10.437	2.562			11.4997	11.499	0.000714286		11.562	11.857	-0.295		11.25	10	9.812	11.501	9.982	7.919		11.5	10.062	7.812	11.5	10.106	7.805		11.5	9.687	8.187	11.497	9.993	7.875		11.687	11.875	11.625	11.631	11.802	11.873
11.4819	7.875	0	0	0		7.875	8.187	8.187	10.5	2.625			11.4819	11.499	-0.0171429		11.562	11.857	-0.295		11.25	10	9.812	11.501	9.981	7.921		11.5	10.062	7.812	11.5	10.105	7.807		11.562	9.687	8.187	11.496	9.992	7.878		11.687	11.875	11.625	11.631	11.802	11.872
11.4997	7.875	0	0	0		7.875	8.25	8.25	10.562	2.687			11.4997	11.498	0.00171429		11.562	11.857	-0.295		11.25	10	9.875	11.5	9.981	7.923		11.5	10.062	7.812	11.499	10.105	7.809		11.5	9.687	8.25	11.496	9.991	7.881		11.687	11.875	11.625	11.63	11.802	11.872
11.4997	7.937	0	0	0		7.937	8.25	8.187	10.312	2.375			11.4997	11.498	0.00171429		11.562	11.857	-0.295		11.25	10	9.875	11.499	9.98	7.926		11.5	10.062	7.812	11.499	10.104	7.811		11.5	9.687	8.25	11.495	9.99	7.885		11.687	11.875	11.625	11.63	11.801	11.872
11.5087	7.937	0	0	0		7.937	8.187	8.125	10.312	2.375			11.5087	11.497	0.0117143		11.562	11.857	-0.295		11.25	10	9.937	11.499	9.979	7.928		11.5	10.062	7.812	11.498	10.103	7.813		11.5	9.687	8.25	11.495	9.99	7.888		11.687	11.875	11.625	11.629	11.801	11.872
11.4997	7.937	0	0	0		7.937	8.187	8.187	10.25	2.313			11.4997	11.497	0.00271429		11.562	11.856	-0.294		11.25	10	9.937	11.498	9.979	7.931		11.562	10.062	7.812	11.498	10.102	7.815		11.562	9.687	8.25	11.494	9.989	7.892		11.687	11.875	11.625	11.629	11.801	11.872
11.4997	7.937	0	0	0		7.937	8.187	8.187	10.187	2.25			11.4997	11.497	0.00271429		11.562	11.856	-0.294		11.25	10	9.937	11.498	9.978	7.933		11.562	10.062	7.812	11.497	10.101	7.817		11.5	9.687	8.25	11.494	9.988	7.895		11.687	11.875	11.625	11.628	11.8	11.872
11.4819	8	0	0	0		8	8.25	8.187	10.312	2.312			11.4819	11.496	-0.0141429		11.562	11.856	-0.294		11.25	10	9.937	11.497	9.977	7.935		11.5	10.062	7.812	11.497	10.101	7.819		11.5	9.687	8.25	11.493	9.987	7.898		11.687	11.875	11.625	11.628	11.8	11.872
11.4909	8	0	0	0		8	8.25	8.187	10.437	2.437			11.4909	11.496	-0.00514286		11.562	11.856	-0.294		11.25	10	10	11.497	9.976	7.937		11.5	10.062	7.812	11.496	10.1	7.821		11.5	9.687	8.312	11.493	9.987	7.902		11.687	11.875	11.625	11.627	11.8	11.871
11.4909	7.937	0	0	0		7.937	8.25	8.25	10.625	2.688			11.4909	11.495	-0.00414286		11.562	11.856	-0.294		11.25	10	10	11.496	9.976	7.942		11.5	10.062	7.812	11.496	10.099	7.823		11.5	9.687	8.312	11.492	9.986	7.906		11.687	11.875	11.625	11.627	11.8	11.871
11.4909	7.875	0	0	0		7.875	8.125	8.312	10.75	2.875			11.4909	11.495	-0.00414286		11.562	11.856	-0.294		11.25	10	10.062	11.496	9.975	7.951		11.5	10.062	7.812	11.495	10.098	7.826		11.5	9.687	8.312	11.492	9.985	7.913		11.687	11.875	11.625	11.626	11.799	11.871
11.4819	7.937	0	0	0		7.937	8.062	8.312	10.75	2.813			11.4819	11.495	-0.0131429		11.562	11.856	-0.294		11.25	10	10.062	11.495	9.974	7.961		11.562	10.062	7.812	11.495	10.097	7.829		11.5	9.687	8.312	11.491	9.985	7.92		11.687	11.875	11.625	11.626	11.799	11.871
11.4999	8	0	0	0		8	8.187	8.312	10.625	2.625			11.4999	11.494	0.00585714		11.562	11.856	-0.294		11.25	10	10.125	11.495	9.974	7.97		11.5	10.062	7.812	11.494	10.097	7.831		11.5	9.687	8.375	11.491	9.984	7.927		11.687	11.875	11.625	11.626	11.799	11.871
11.4909	8.062	0	0	0		8.062	8.312	8.375	10.812	2.75			11.4909	11.494	-0.00314286		11.562	11.856	-0.294		11.25	10	10.125	11.494	9.973	7.98		11.5	10.062	7.812	11.494	10.096	7.834		11.5	9.687	8.375	11.49	9.983	7.934		11.687	11.875	11.625	11.625	11.798	11.871
11.4997	8.125	0	0	0		8.125	8.375	8.437	10.937	2.812			11.4997	11.494	0.00571429		11.562	11.856	-0.294		11.25	10	10.187	11.494	9.973	7.989		11.5	10.062	7.875	11.493	10.095	7.837		11.562	9.687	8.375	11.49	9.983	7.941		11.687	11.875	11.625	11.625	11.798	11.871
11.4999	8.125	0	0	0		8.125	8.375	8.5	10.937	2.812			11.4999	11.493	0.00685714		11.562	11.856	-0.294		11.25	10	10.25	11.493	9.972	7.999		11.562	10.062	7.812	11.493	10.094	7.839		11.5	9.687	8.375	11.489	9.982	7.948		11.687	11.875	11.625	11.624	11.798	11.871
11.4909	8.125	0	0	0		8.125	8.312	8.5	11	2.875			11.4909	11.493	-0.00214286		11.562	11.856	-0.294		11.25	10	10.25	11.493	9.971	8.009		11.5	10.062	7.812	11.492	10.093	7.842		11.562	9.687	8.437	11.489	9.981	7.955		11.687	11.875	11.625	11.624	11.798	11.87
11.4819	8.062	0	0	0		8.062	8.312	8.437	11.125	3.063			11.4819	11.493	-0.0111429		11.562	11.856	-0.294		11.25	10	10.312	11.492	9.971	8.018		11.5	10.062	7.875	11.492	10.092	7.844		11.5	9.687	8.437	11.488	9.981	7.962		11.687	11.875	11.625	11.623	11.797	11.87
11.4819	8	0	0	0		8	8.187	8.375	11.187	3.187			11.4819	11.492	-0.0101429		11.562	11.856	-0.294		11.25	10	10.312	11.492	9.97	8.028		11.5	10.062	7.875	11.491	10.092	7.847		11.5	9.687	8.437	11.488	9.98	7.969		11.687	11.875	11.625	11.623	11.797	11.87
11.4909	8	0	0	0		8	8.187	8.312	11.312	3.312			11.4909	11.492	-0.00114286		11.562	11.856	-0.294		11.25	10	10.375	11.491	9.969	8.037		11.5	10.062	7.875	11.491	10.091	7.85		11.5	9.687	8.437	11.487	9.979	7.976		11.687	11.875	11.625	11.622	11.797	11.87
11.4909	8.062	0	0	0		8.062	8.25	8.375	11.375	3.313			11.4909	11.492	-0.00114286		11.562	11.856	-0.294		11.25	10	10.437	11.491	9.969	8.047		11.5	10.062	7.875	11.49	10.09	7.852		11.5	9.687	8.437	11.487	9.979	7.983		11.687	11.875	11.625	11.622	11.796	11.87
11.4819	8	0	0	0		8	8.187	8.312	11.375	3.375			11.4819	11.491	-0.00914286		11.562	11.856	-0.294		11.25	10	10.437	11.49	9.968	8.056		11.5	10.062	7.875	11.49	10.089	7.855		11.562	9.687	8.437	11.486	9.978	7.99		11.687	11.875	11.625	11.622	11.796	11.87
11.4819	7.937	0	0	0		7.937	8.125	8.25	11.375	3.438			11.4819	11.491	-0.00914286		11.562	11.856	-0.294		11.25	10	10.5	11.49	9.967	8.066		11.5	10.062	7.875	11.489	10.088	7.858		11.5	9.687	8.437	11.486	9.977	7.997		11.687	11.875	11.625	11.621	11.796	11.87
11.4819	8.062	0	0	0		8.062	8.312	8.312	11.437	3.375			11.4819	11.491	-0.00914286		11.562	11.856	-0.294		11.25	10	10.5	11.489	9.967	8.076		11.5	10.062	7.875	11.489	10.088	7.86		11.5	9.687	8.437	11.485	9.976	8.004		11.687	11.875	11.625	11.621	11.795	11.87
11.4909	8.125	0	0	0		8.125	8.375	8.25	11.437	3.312			11.4909	11.49	0.000857143		11.562	11.856	-0.294		11.25	10	10.5	11.489	9.966	8.085		11.5	10.062	7.875	11.488	10.087	7.863		11.5	9.687	8.437	11.485	9.976	8.011		11.687	11.875	11.625	11.62	11.795	11.869
11.4997	8.125	0	0	0		8.125	8.437	8.25	11.437	3.312			11.4997	11.49	0.00971429		11.562	11.856	-0.294		11.25	10	10.562	11.488	9.965	8.095		11.5	10.062	7.875	11.488	10.086	7.866		11.5	9.687	8.437	11.484	9.975	8.018		11.687	11.875	11.625	11.62	11.795	11.869
11.5087	8.125	0	0	0		8.125	8.5	8.187	11.5	3.375			11.5087	11.49	0.0187143		11.562	11.856	-0.294		11.25	10	10.562	11.488	9.965	8.095		11.5	10.062	7.875	11.487	10.085	7.868		11.5	9.687	8.437	11.484	9.974	8.021		11.687	11.875	11.625	11.619	11.795	11.869
11.4819	8.062	0	0	0		8.062	8.5	8.187	11.562	3.5			11.4819	11.489	-0.00714286		11.562	11.856	-0.294		11.25	10	10.625	11.487	9.964	8.094		11.5	10.062	7.875	11.487	10.085	7.871		11.5	9.687	8.437	11.483	9.974	8.023		11.687	11.875	11.625	11.619	11.794	11.869
11.4819	8.062	0	0	0		8.062	8.5	8.187	11.562	3.5			11.4819	11.489	-0.00714286		11.562	11.856	-0.294		11.25	10	10.625	11.487	9.964	8.092		11.5	10.062	7.875	11.486	10.084	7.873		11.5	9.687	8.437	11.483	9.973	8.025		11.687	11.875	11.625	11.618	11.794	11.869
11.4819	8.062	0	0	0		8.062	8.5	8.187	11.562	3.5			11.4819	11.488	-0.00614286		11.562	11.856	-0.294		11.25	10	10.687	11.486	9.963	8.091		11.5	10.062	7.875	11.486	10.083	7.876		11.5	9.687	8.437	11.482	9.973	8.027		11.687	11.875	11.625	11.618	11.794	11.869
11.4729	8.062	0	0	0		8.062	8.312	8.187	11.562	3.5			11.4729	11.488	-0.0151429		11.562	11.856	-0.294		11.25	10	10.687	11.486	9.962	8.089		11.5	10.062	7.875	11.485	10.082	7.879		11.5	9.687	8.437	11.482	9.972	8.029		11.687	11.875	11.625	11.618	11.793	11.869
11.4729	7.937	0	0	0		7.937	8.25	8.25	11.562	3.625			11.4729	11.487	-0.0141429		11.562	11.856	-0.294		11.25	10	10.75	11.485	9.962	8.088		11.5	10.062	7.875	11.485	10.081	7.881		11.5	9.687	8.437	11.481	9.971	8.031		11.687	11.875	11.625	11.617	11.793	11.868
11.4729	7.875	0	0	0		7.875	8.187	8.312	11.562	3.687			11.4729	11.487	-0.0141429		11.562	11.856	-0.294		11.25	10	10.75	11.485	9.961	8.086		11.5	10.062	7.937	11.484	10.081	7.884		11.5	9.687	8.437	11.481	9.971	8.033		11.687	11.875	11.625	11.617	11.793	11.868
11.4819	7.875	0	0	0		7.875	8.125	8.312	11.5	3.625			11.4819	11.486	-0.00414286		11.562	11.856	-0.294		11.25	10	10.75	11.484	9.961	8.085		11.5	10.062	7.875	11.484	10.08	7.887		11.5	9.687	8.437	11.48	9.97	8.035		11.687	11.875	11.625	11.616	11.793	11.868
11.4817	7.875	0	0	0		7.875	8.125	8.312	11.5	3.625			11.4817	11.486	-0.00428571		11.562	11.856	-0.294		11.25	10	10.75	11.484	9.96	8.084		11.5	10.062	7.875	11.483	10.079	7.889		11.5	9.687	8.437	11.48	9.969	8.036		11.687	11.875	11.625	11.616	11.792	11.868
11.4729	7.812	0	0	0		7.812	8.062	8.312	11.437	3.625			11.4729	11.486	-0.0131429		11.562	11.856	-0.294		11.25	10	10.75	11.483	9.959	8.082		11.5	10.062	7.875	11.483	10.078	7.892		11.5	9.687	8.437	11.479	9.969	8.038		11.687	11.875	11.625	11.615	11.792	11.868
11.4909	7.937	0	0	0		7.937	8.25	8.312	11.375	3.438			11.4909	11.485	0.00585714		11.562	11.856	-0.294		11.25	10	10.687	11.483	9.959	8.081		11.5	10.062	7.875	11.482	10.078	7.895		11.5	9.687	8.437	11.479	9.968	8.04		11.687	11.875	11.625	11.615	11.792	11.868
11.4819	8	0	0	0		8	8.312	8.312	11.375	3.375			11.4819	11.485	-0.00314286		11.562	11.856	-0.294		11.25	10	10.687	11.482	9.958	8.079		11.5	10.062	7.875	11.482	10.077	7.898		11.5	9.687	8.437	11.478	9.967	8.042		11.687	11.875	11.625	11.614	11.791	11.868
11.4909	8.062	0	0	0		8.062	8.375	8.25	11.312	3.25			11.4909	11.484	0.00685714		11.562	11.856	-0.294		11.25	10	10.687	11.482	9.958	8.078		11.5	10.062	7.937	11.481	10.076	7.9		11.5	9.687	8.5	11.478	9.967	8.044		11.687	11.875	11.625	11.614	11.791	11.868
11.4909	8	0	0	0		8	8.375	8.125	11.375	3.375			11.4909	11.484	0.00685714		11.562	11.856	-0.294		11.25	10	10.687	11.481	9.957	8.077		11.5	10.062	7.875	11.481	10.075	7.903		11.5	9.687	8.437	11.477	9.966	8.046		11.687	11.875	11.625	11.614	11.791	11.868
11.4729	8	0	0	0		8	8.437	8.125	11.375	3.375			11.4729	11.483	-0.0101429		11.562	11.856	-0.294		11.25	10.062	10.687	11.48	9.956	8.075		11.5	10.062	7.875	11.48	10.074	7.906		11.5	9.687	8.437	11.477	9.966	8.048		11.687	11.875	11.625	11.613	11.79	11.867
11.4729	8	0	0	0		8	8.375	8.125	11.375	3.375			11.4729	11.483	-0.0101429		11.562	11.856	-0.294		11.25	10	10.687	11.48	9.956	8.074		11.5	10.062	7.937	11.48	10.074	7.908		11.5	9.687	8.437	11.476	9.965	8.05		11.687	11.875	11.625	11.613	11.79	11.867
11.4729	8.062	0	0	0		8.062	8.437	8.125	11.375	3.313			11.4729	11.482	-0.00914286		11.562	11.856	-0.294		11.25	10	10.75	11.479	9.955	8.074		11.5	10.062	7.937	11.479	10.073	7.911		11.5	9.687	8.437	11.476	9.964	8.052		11.687	11.875	11.625	11.612	11.79	11.867
11.4729	7.937	0	0	0		7.937	8.312	8.062	11.187	3.25			11.4729	11.482	-0.00914286		11.562	11.856	-0.294		11.25	10.062	10.75	11.479	9.955	8.076		11.5	10.062	7.937	11.479	10.072	7.913		11.5	9.687	8.437	11.475	9.964	8.055		11.687	11.875	11.625	11.612	11.79	11.867
11.4729	7.937	0	0	0		7.937	8.375	8	11.187	3.25			11.4729	11.482	-0.00914286		11.562	11.856	-0.294		11.25	10	10.75	11.478	9.954	8.079		11.5	10.062	7.937	11.479	10.071	7.916		11.5	9.687	8.375	11.475	9.963	8.057		11.687	11.875	11.625	11.611	11.789	11.867
11.4819	7.937	0	0	0		7.937	8.312	8.062	11.25	3.313			11.4819	11.481	0.000857143		11.562	11.856	-0.294		11.25	10	10.75	11.478	9.954	8.081		11.5	10.062	7.937	11.478	10.071	7.918		11.5	9.687	8.375	11.474	9.963	8.059		11.687	11.875	11.625	11.611	11.789	11.867
11.4729	7.875	0	0	0		7.875	8.187	8.187	11.312	3.437			11.4729	11.481	-0.00814286		11.562	11.856	-0.294		11.25	10.062	10.75	11.477	9.953	8.084		11.5	10.062	7.937	11.478	10.07	7.921		11.5	9.687	8.437	11.474	9.962	8.062		11.687	11.875	11.625	11.61	11.789	11.867
11.4639	7.937	0	0	0		7.937	8.25	8.062	11.375	3.438			11.4639	11.48	-0.0161429		11.562	11.856	-0.294		11.25	10.062	10.75	11.477	9.953	8.086		11.5	10.062	7.937	11.477	10.069	7.924		11.5	9.687	8.437	11.473	9.961	8.064		11.687	11.875	11.625	11.61	11.788	11.867
11.4819	8	0	0	0		8	8.375	8.187	11.375	3.375			11.4819	11.48	0.00185714		11.562	11.856	-0.294		11.25	10.062	10.812	11.476	9.952	8.088		11.5	10.062	7.937	11.477	10.068	7.926		11.5	9.687	8.437	11.473	9.961	8.066		11.687	11.875	11.625	11.61	11.788	11.866
11.4729	8	0	0	0		8	8.375	8.312	11.5	3.5			11.4729	11.479	-0.00614286		11.562	11.855	-0.293		11.25	10	10.812	11.476	9.951	8.091		11.5	10.062	7.937	11.476	10.068	7.929		11.5	9.687	8.437	11.472	9.96	8.069		11.687	11.875	11.625	11.609	11.788	11.866
11.4729	7.937	0	0	0		7.937	8.312	8.375	11.625	3.688			11.4729	11.479	-0.00614286		11.562	11.855	-0.293		11.25	10.062	10.875	11.475	9.951	8.093		11.5	10.062	7.937	11.476	10.067	7.931		11.5	9.687	8.5	11.472	9.96	8.071		11.687	11.875	11.625	11.609	11.788	11.866
11.4639	8	0	0	0		8	8.375	8.437	11.75	3.75			11.4639	11.479	-0.0151429		11.562	11.855	-0.293		11.25	10.062	10.875	11.475	9.95	8.096		11.5	10.062	7.937	11.475	10.066	7.934		11.5	9.687	8.5	11.471	9.959	8.073		11.687	11.875	11.625	11.608	11.787	11.866
11.4729	8.062	0	0	0		8.062	8.5	8.375	11.812	3.75			11.4729	11.478	-0.00514286		11.562	11.855	-0.293		11.25	10.062	10.937	11.474	9.95	8.098		11.5	10.062	7.937	11.475	10.065	7.936		11.5	9.687	8.5	11.471	9.958	8.075		11.625	11.875	11.625	11.608	11.787	11.866
11.4729	8	0	0	0		8	8.562	8.125	11.937	3.937			11.4729	11.478	-0.00514286		11.562	11.855	-0.293		11.25	10.062	11	11.474	9.949	8.1		11.5	10.062	7.937	11.474	10.065	7.939		11.5	9.687	8.5	11.47	9.958	8.078		11.687	11.875	11.625	11.607	11.787	11.866
11.4729	8.062	0	0	0		8.062	8.437	8.062	11.312	3.25			11.4729	11.477	-0.00414286		11.562	11.855	-0.293		11.25	10.062	11.062	11.473	9.949	8.103		11.5	10.062	7.937	11.474	10.064	7.942		11.5	9.687	8.5	11.47	9.957	8.08		11.687	11.875	11.625	11.607	11.786	11.866
11.4639	8	0	0	0		8	8.375	8.125	10.875	2.875			11.4639	11.477	-0.0131429		11.562	11.855	-0.293		11.25	10.062	11.062	11.473	9.948	8.105		11.5	10.062	7.937	11.473	10.063	7.944		11.5	9.687	8.5	11.469	9.957	8.082		11.687	11.875	11.625	11.607	11.786	11.866
11.4819	8	0	0	0		8	8.437	8.125	10.562	2.562			11.4819	11.477	0.00485714		11.562	11.855	-0.293		11.25	10.062	11.062	11.472	9.948	8.107		11.5	10.062	7.937	11.473	10.062	7.947		11.5	9.687	8.5	11.469	9.956	8.085		11.687	11.875	11.625	11.606	11.786	11.865
11.4729	8.062	0	0	0		8.062	8.437	8.25	10.375	2.313			11.4729	11.476	-0.00314286		11.562	11.855	-0.293		11.25	10.062	11.062	11.472	9.947	8.11		11.5	10.062	7.937	11.472	10.062	7.949		11.5	9.687	8.5	11.468	9.955	8.087		11.687	11.875	11.625	11.606	11.785	11.865
11.4729	8.125	0	0	0		8.125	8.5	8.312	10.562	2.437			11.4729	11.476	-0.00314286		11.562	11.855	-0.293		11.25	10.062	11.062	11.471	9.946	8.113		11.5	10.062	7.937	11.472	10.061	7.952		11.5	9.687	8.562	11.468	9.955	8.09		11.687	11.875	11.625	11.605	11.785	11.865
11.4729	8.187	0	0	0		8.187	8.5	8.312	10.812	2.625			11.4729	11.475	-0.00214286		11.562	11.855	-0.293		11.25	10.062	11.062	11.471	9.946	8.124		11.5	10.062	7.937	11.471	10.06	7.955		11.5	9.687	8.562	11.467	9.954	8.097		11.687	11.875	11.625	11.605	11.785	11.865
11.4729	8.062	0	0	0		8.062	8.5	8.125	11.25	3.188			11.4729	11.475	-0.00214286		11.562	11.855	-0.293		11.25	10.062	11.062	11.47	9.945	8.135		11.5	10.062	7.937	11.471	10.06	7.958		11.5	9.687	8.5	11.467	9.954	8.104		11.687	11.875	11.625	11.604	11.785	11.865
11.4639	8.062	0	0	0		8.062	8.625	8.062	11.437	3.375			11.4639	11.475	-0.0111429		11.562	11.855	-0.293		11.25	10.062	11.125	11.47	9.945	8.145		11.5	10.062	7.937	11.47	10.059	7.961		11.5	9.687	8.5	11.466	9.953	8.111		11.687	11.875	11.625	11.604	11.784	11.865
11.4819	8.125	0	0	0		8.125	8.625	8.125	11.562	3.437			11.4819	11.475	0.00685714		11.562	11.855	-0.293		11.25	10.062	11.125	11.469	9.944	8.156		11.5	10.062	8	11.47	10.058	7.964		11.5	9.687	8.5	11.466	9.953	8.119		11.687	11.875	11.625	11.604	11.784	11.865
11.4729	8	0	0	0		8	8.437	8.125	11.75	3.75			11.4729	11.474	-0.00114286		11.562	11.855	-0.293		11.25	10.062	11.187	11.469	9.944	8.167		11.5	10.062	8	11.469	10.057	7.967		11.5	9.687	8.5	11.465	9.952	8.126		11.687	11.875	11.625	11.603	11.784	11.865
11.4729	7.937	0	0	0		7.937	8.312	8.25	11.812	3.875			11.4729	11.474	-0.00114286		11.562	11.856	-0.294		11.25	10.062	11.187	11.468	9.943	8.178		11.5	10.062	8	11.469	10.057	7.97		11.5	9.687	8.562	11.465	9.952	8.133		11.687	11.875	11.625	11.603	11.783	11.865
11.4729	8	0	0	0		8	8.437	8.312	11.875	3.875			11.4729	11.474	-0.00114286		11.562	11.856	-0.294		11.25	10.062	11.187	11.468	9.943	8.189		11.5	10.062	7.937	11.468	10.056	7.973		11.5	9.687	8.562	11.464	9.951	8.14		11.687	11.875	11.625	11.602	11.783	11.864
11.4639	8.187	0	0	0		8.187	8.625	8.437	11.75	3.563			11.4639	11.473	-0.00914286		11.562	11.856	-0.294		11.25	10.062	11.25	11.467	9.942	8.199		11.5	10.062	8	11.468	10.055	7.976		11.5	9.687	8.625	11.464	9.951	8.148		11.687	11.875	11.625	11.602	11.783	11.864
11.4729	8.187	0	0	0		8.187	8.75	8.312	11.937	3.75			11.4729	11.473	-0.000142857		11.5	11.856	-0.356		11.25	10.062	11.312	11.467	9.942	8.21		11.5	10.062	8	11.467	10.055	7.979		11.5	9.687	8.625	11.463	9.95	8.155		11.625	11.875	11.625	11.601	11.782	11.864
11.4639	8.187	0	0	0		8.187	8.75	8.312	12.062	3.875			11.4639	11.473	-0.00914286		11.5	11.856	-0.356		11.25	10.062	11.312	11.466	9.941	8.221		11.5	10.062	8	11.467	10.054	7.982		11.5	9.687	8.625	11.463	9.95	8.162		11.625	11.875	11.625	11.601	11.782	11.864
11.4819	8.187	0	0	0		8.187	8.75	8.187	12.062	3.875			11.4819	11.472	0.00985714		11.5	11.856	-0.356		11.25	10.062	11.375	11.466	9.941	8.232		11.5	10.062	8	11.466	10.053	7.985		11.5	9.687	8.625	11.462	9.949	8.169		11.687	11.875	11.625	11.6	11.782	11.864
11.4639	8.25	0	0	0		8.25	8.75	8.312	12.187	3.937			11.4639	11.472	-0.00814286		11.562	11.856	-0.294		11.25	10.062	11.437	11.465	9.941	8.243		11.5	10.062	8	11.466	10.052	7.988		11.5	9.687	8.625	11.462	9.948	8.177		11.687	11.875	11.625	11.6	11.782	11.864
11.4729	8.312	0	0	0		8.312	8.812	8.437	12.187	3.875			11.4729	11.472	0.000857143		11.562	11.856	-0.294		11.25	10.062	11.437	11.465	9.94	8.253		11.5	10.062	8	11.465	10.052	7.991		11.5	9.687	8.625	11.461	9.948	8.184		11.687	11.875	11.625	11.6	11.781	11.864
11.4639	8.312	0	0	0		8.312	8.875	8.437	12	3.688			11.4639	11.472	-0.00814286		11.5	11.856	-0.356		11.25	10.062	11.5	11.464	9.94	8.264		11.5	10.062	8	11.465	10.051	7.994		11.5	9.687	8.687	11.461	9.947	8.191		11.687	11.875	11.625	11.599	11.781	11.864
11.4639	8.312	0	0	0		8.312	8.75	8.5	12.187	3.875			11.4639	11.471	-0.00714286		11.562	11.856	-0.294		11.25	10.062	11.562	11.464	9.939	8.275		11.5	10.062	8	11.464	10.05	7.997		11.5	9.687	8.687	11.46	9.947	8.198		11.625	11.875	11.625	11.599	11.781	11.864
11.4639	8.25	0	0	0		8.25	8.812	8.437	12.187	3.937			11.4639	11.471	-0.00714286		11.562	11.856	-0.294		11.25	10.062	11.562	11.463	9.939	8.286		11.5	10.062	8	11.464	10.05	8.001		11.5	9.687	8.687	11.46	9.946	8.206		11.625	11.875	11.625	11.598	11.78	11.863
11.4729	8.25	0	0	0		8.25	8.812	8.375	12.187	3.937			11.4729	11.471	0.00185714		11.562	11.856	-0.294		11.25	10.062	11.625	11.463	9.938	8.301		11.5	10.062	8	11.463	10.049	8.004		11.5	9.687	8.687	11.459	9.946	8.217		11.687	11.875	11.625	11.598	11.78	11.863
11.4729	8.25	0	0	0		8.25	8.812	8.437	12.25	4			11.4729	11.471	0.00185714		11.5	11.856	-0.356		11.25	10.062	11.687	11.462	9.938	8.318		11.5	10.062	8	11.463	10.048	8.009		11.5	9.687	8.687	11.459	9.945	8.229		11.687	11.875	11.625	11.597	11.78	11.863
11.4729	8.312	0	0	0		8.312	8.812	8.5	12.312	4			11.4729	11.47	0.00285714		11.562	11.856	-0.294		11.25	10.062	11.687	11.462	9.937	8.335		11.5	10.062	8	11.462	10.048	8.013		11.5	9.687	8.75	11.458	9.945	8.242		11.625	11.875	11.625	11.597	11.78	11.863
11.4729	8.312	0	0	0		8.312	8.875	8.562	12.062	3.75			11.4729	11.47	0.00285714		11.5	11.856	-0.356		11.25	10.062	11.687	11.461	9.937	8.352		11.5	10.062	8	11.462	10.047	8.017		11.5	9.687	8.75	11.458	9.944	8.255		11.625	11.875	11.625	11.597	11.779	11.863
11.4639	8.375	0	0	0		8.375	8.875	8.625	12.187	3.812			11.4639	11.47	-0.00614286		11.5	11.856	-0.356		11.25	10.125	11.75	11.461	9.936	8.369		11.5	10.062	8	11.462	10.046	8.022		11.5	9.687	8.75	11.457	9.944	8.268		11.687	11.875	11.625	11.596	11.779	11.863
11.4639	8.375	0	0	0		8.375	8.75	8.562	12.187	3.812			11.4639	11.47	-0.00614286		11.562	11.857	-0.295		11.25	10.062	11.75	11.46	9.936	8.386		11.5	10.062	8	11.461	10.045	8.026		11.5	9.687	8.812	11.457	9.943	8.28		11.687	11.875	11.625	11.596	11.779	11.863
11.4729	8.312	0	0	0		8.312	8.75	8.562	12.5	4.188			11.4729	11.47	0.00285714		11.5	11.857	-0.357		11.25	10.062	11.75	11.46	9.935	8.402		11.5	10.062	8	11.461	10.045	8.03		11.5	9.687	8.812	11.456	9.943	8.293		11.687	11.875	11.625	11.595	11.778	11.863
11.4639	8.312	0	0	0		8.312	8.812	8.625	12.562	4.25			11.4639	11.469	-0.00514286		11.5	11.857	-0.357		11.25	10.062	11.812	11.459	9.935	8.419		11.5	10.062	8	11.46	10.044	8.034		11.5	9.687	8.812	11.456	9.942	8.306		11.687	11.875	11.625	11.595	11.778	11.863
11.4639	8.375	0	0	0		8.375	8.875	8.687	12.125	3.75			11.4639	11.469	-0.00514286		11.562	11.857	-0.295		11.25	10.062	11.812	11.459	9.935	8.436		11.5	10.062	8	11.46	10.043	8.039		11.5	9.687	8.875	11.455	9.942	8.319		11.625	11.875	11.625	11.595	11.778	11.862
11.4639	8.375	0	0	0		8.375	8.937	8.625	12.25	3.875			11.4639	11.469	-0.00514286		11.5	11.857	-0.357		11.25	10.062	11.812	11.458	9.934	8.453		11.5	10.062	8	11.459	10.043	8.043		11.5	9.687	8.875	11.455	9.941	8.331		11.687	11.875	11.625	11.594	11.778	11.862
11.4729	8.375	0	0	0		8.375	8.812	8.562	12.375	4			11.4729	11.469	0.00385714		11.5	11.857	-0.357		11.25	10.062	11.812	11.458	9.934	8.47		11.5	10.062	8	11.459	10.042	8.047		11.5	9.687	8.875	11.454	9.941	8.344		11.625	11.875	11.625	11.594	11.777	11.862
11.4639	8.375	0	0	0		8.375	8.812	8.5	12.5	4.125			11.4639	11.469	-0.00514286		11.5	11.857	-0.357		11.25	10.125	11.812	11.457	9.933	8.487		11.5	10.062	8	11.458	10.041	8.051		11.5	9.687	8.875	11.454	9.941	8.357		11.687	11.875	11.625	11.593	11.777	11.862
11.4639	8.5	0	0	0		8.5	8.875	8.625	12.5	4			11.4639	11.468	-0.00414286		11.5	11.857	-0.357		11.187	10.125	11.875	11.457	9.933	8.504		11.5	10.062	8	11.458	10.041	8.056		11.5	9.687	8.875	11.453	9.94	8.37		11.687	11.875	11.625	11.593	11.777	11.862
11.4639	8.562	0	0	0		8.562	9	8.562	12.625	4.063			11.4639	11.468	-0.00414286		11.5	11.857	-0.357		11.25	10.125	11.875	11.457	9.932	8.521		11.5	10.062	8.062	11.457	10.04	8.06		11.5	9.687	8.875	11.453	9.94	8.382		11.687	11.875	11.625	11.592	11.776	11.862
11.4639	8.562	0	0	0		8.562	9	8.625	12.687	4.125			11.4639	11.468	-0.00414286		11.5	11.858	-0.358		11.25	10.125	11.937	11.456	9.932	8.538		11.5	10.062	8	11.457	10.039	8.064		11.5	9.687	8.937	11.452	9.939	8.395		11.687	11.875	11.625	11.592	11.776	11.862
11.4639	8.625	0	0	0		8.625	9.062	8.75	12.625	4			11.4639	11.468	-0.00414286		11.5	11.858	-0.358		11.25	10.125	11.937	11.456	9.931	8.555		11.5	10.062	8.062	11.456	10.039	8.069		11.5	9.687	8.937	11.452	9.939	8.408		11.625	11.875	11.625	11.592	11.776	11.862
11.4639	8.625	0	0	0		8.625	9.062	8.812	12.687	4.062			11.4639	11.468	-0.00414286		11.5	11.858	-0.358		11.25	10.125	12	11.455	9.931	8.562		11.5	10.062	8.062	11.456	10.038	8.073		11.5	9.687	8.937	11.451	9.938	8.416		11.625	11.875	11.562	11.591	11.776	11.862
11.4639	8.5	0	0	0		8.5	8.937	8.875	12.75	4.25			11.4639	11.467	-0.00314286		11.5	11.858	-0.358		11.25	10.125	12	11.455	9.931	8.548		11.5	10.062	8.062	11.455	10.037	8.076		11.5	9.687	9	11.451	9.938	8.412		11.687	11.875	11.625	11.591	11.775	11.862
11.4639	8.375	0	0	0		8.375	8.75	8.875	12.875	4.5			11.4639	11.467	-0.00314286		11.5	11.858	-0.358		11.25	10.125	12.062	11.454	9.93	8.534		11.5	10.062	8.062	11.455	10.037	8.08		11.5	9.687	9	11.45	9.937	8.409		11.625	11.875	11.625	11.59	11.775	11.861
11.4639	8.312	0	0	0		8.312	8.687	8.875	13	4.688			11.4639	11.466	-0.00214286		11.5	11.858	-0.358		11.25	10.125	12.125	11.454	9.93	8.52		11.5	10.062	8.062	11.454	10.036	8.084		11.5	9.687	9	11.45	9.937	8.406		11.625	11.875	11.625	11.59	11.775	11.861
11.4639	8.312	0	0	0		8.312	8.625	8.812	12.937	4.625			11.4639	11.465	-0.00114286		11.5	11.858	-0.358		11.25	10.125	12.125	11.453	9.93	8.506		11.5	10.062	8.062	11.454	10.035	8.087		11.5	9.687	9	11.45	9.936	8.403		11.625	11.875	11.562	11.59	11.774	11.861
11.4729	8.375	0	0	0		8.375	8.625	8.687	12.812	4.437			11.4729	11.465	0.00785714		11.5	11.858	-0.358		11.25	10.125	12.125	11.453	9.929	8.492		11.5	10.062	8.062	11.454	10.035	8.091		11.5	9.687	9	11.449	9.936	8.4		11.625	11.875	11.625	11.589	11.774	11.861
11.4639	8.375	0	0	0		8.375	8.562	8.687	12.812	4.437			11.4639	11.464	-0.000142857		11.562	11.858	-0.296		11.25	10.125	12.125	11.452	9.929	8.478		11.5	10.062	8.062	11.453	10.034	8.095		11.5	9.687	9	11.449	9.936	8.397		11.625	11.875	11.562	11.589	11.774	11.861
11.4639	8.312	0	0	0		8.312	8.5	8.687	12.875	4.563			11.4639	11.464	-0.000142857		11.5	11.858	-0.358		11.25	10.125	12.062	11.452	9.928	8.464		11.5	10.062	8.062	11.453	10.034	8.098		11.5	9.687	9	11.448	9.935	8.394		11.625	11.875	11.625	11.588	11.773	11.861
11.4729	8.312	0	0	0		8.312	8.5	8.562	12.625	4.313			11.4729	11.463	0.00985714		11.5	11.858	-0.358		11.25	10.125	12.062	11.451	9.928	8.45		11.5	10.062	8.062	11.452	10.033	8.102		11.5	9.687	9	11.448	9.935	8.391		11.625	11.875	11.625	11.588	11.773	11.861
11.4639	8.25	0	0	0		8.25	8.625	8.5	12.562	4.312			11.4639	11.463	0.000857143		11.562	11.857	-0.295		11.25	10.125	12.062	11.451	9.928	8.436		11.5	10.062	8.062	11.452	10.032	8.106		11.5	9.687	9	11.447	9.934	8.388		11.625	11.875	11.562	11.587	11.773	11.861
11.4639	8.25	0	0	0		8.25	8.625	8.5	12.625	4.375			11.4639	11.462	0.00185714		11.5	11.857	-0.357		11.25	10.125	12.062	11.45	9.927	8.422		11.5	10.062	8.062	11.451	10.032	8.109		11.5	9.687	8.937	11.447	9.934	8.385		11.687	11.875	11.562	11.587	11.773	11.861
11.4639	8.25	0	0	0		8.25	8.562	8.562	12.625	4.375			11.4639	11.462	0.00185714		11.5	11.857	-0.357		11.25	10.125	12.062	11.45	9.927	8.408		11.5	10.062	8.062	11.451	10.031	8.113		11.5	9.687	8.937	11.446	9.933	8.382		11.625	11.875	11.562	11.587	11.772	11.861
11.4639	8.25	0	0	0		8.25	8.562	8.625	12.75	4.5			11.4639	11.461	0.00285714		11.5	11.857	-0.357		11.25	10.125	12.062	11.449	9.927	8.394		11.5	10.062	8.062	11.45	10.03	8.117		11.5	9.687	9	11.446	9.933	8.379		11.625	11.875	11.625	11.586	11.772	11.86
11.4639	8.125	0	0	0		8.125	8.375	8.562	12.687	4.562			11.4639	11.46	0.00385714		11.5	11.857	-0.357		11.25	10.125	12.062	11.449	9.926	8.38		11.5	10.062	8.062	11.45	10.03	8.12		11.5	9.687	8.937	11.445	9.933	8.376		11.687	11.875	11.625	11.586	11.772	11.86
11.4639	8.187	0	0	0		8.187	8.437	8.625	12.625	4.438			11.4639	11.46	0.00385714		11.5	11.857	-0.357		11.25	10.125	12.062	11.448	9.926	8.366		11.5	10.062	8.062	11.449	10.029	8.124		11.5	9.687	8.937	11.445	9.932	8.373		11.625	11.875	11.562	11.585	11.771	11.86
11.4639	8.25	0	0	0		8.25	8.437	8.625	12.187	3.937			11.4639	11.459	0.00485714		11.562	11.857	-0.295		11.25	10.125	12	11.448	9.925	8.352		11.5	10.062	8.062	11.449	10.028	8.128		11.5	9.687	8.937	11.444	9.932	8.37		11.625	11.875	11.562	11.585	11.771	11.86
11.4639	8.312	0	0	0		8.312	8.5	8.562	12	3.688			11.4639	11.459	0.00485714		11.5	11.857	-0.357		11.25	10.125	12	11.447	9.925	8.338		11.5	10.062	8.062	11.448	10.028	8.132		11.5	9.687	8.937	11.444	9.931	8.367		11.625	11.875	11.625	11.585	11.771	11.86
11.4639	8.312	0	0	0		8.312	8.625	8.625	12.187	3.875			11.4639	11.458	0.00585714		11.5	11.857	-0.357		11.25	10.125	12	11.447	9.925	8.342		11.5	10.062	8.125	11.448	10.027	8.135		11.5	9.687	8.937	11.443	9.931	8.368		11.625	11.875	11.562	11.584	11.771	11.86
11.4639	8.375	0	0	0		8.375	8.625	8.687	12.312	3.937			11.4639	11.458	0.00585714		11.562	11.857	-0.295		11.25	10.125	12	11.446	9.924	8.347		11.5	10.062	8.062	11.448	10.026	8.138		11.5	9.687	8.937	11.443	9.931	8.37		11.625	11.875	11.562	11.584	11.77	11.86
11.4639	8.375	0	0	0		8.375	8.625	8.562	12.312	3.937			11.4639	11.458	0.00585714		11.5	11.857	-0.357		11.25	10.125	12	11.446	9.924	8.352		11.5	10	8.125	11.447	10.026	8.141		11.5	9.687	8.937	11.442	9.93	8.371		11.625	11.875	11.625	11.583	11.77	11.86
11.4639	8.312	0	0	0		8.312	8.562	8.562	12.375	4.063			11.4639	11.457	0.00685714		11.5	11.857	-0.357		11.25	10.125	12	11.445	9.924	8.357		11.5	10.062	8.125	11.447	10.025	8.144		11.5	9.687	8.937	11.442	9.93	8.373		11.625	11.875	11.625	11.583	11.77	11.86
11.4639	8.375	0	0	0		8.375	8.625	8.562	12.375	4			11.4639	11.457	0.00685714		11.5	11.858	-0.358		11.25	10.125	11.937	11.445	9.923	8.362		11.5	10.062	8.125	11.446	10.025	8.148		11.5	9.687	8.937	11.441	9.929	8.375		11.687	11.875	11.625	11.582	11.769	11.86
11.4639	8.375	0	0	0		8.375	8.75	8.562	12.375	4			11.4639	11.457	0.00685714		11.5	11.858	-0.358		11.25	10.187	11.937	11.444	9.923	8.367		11.5	10.062	8.125	11.446	10.024	8.151		11.5	9.687	8.937	11.441	9.929	8.376		11.625	11.875	11.625	11.582	11.769	11.86
11.4639	8.375	0	0	0		8.375	8.687	8.5	12.312	3.937			11.4639	11.456	0.00785714		11.5	11.858	-0.358		11.187	10.125	11.937	11.444	9.923	8.372		11.5	10.062	8.125	11.445	10.023	8.154		11.5	9.687	8.937	11.441	9.929	8.378		11.625	11.875	11.562	11.582	11.769	11.859
11.4639	8.312	0	0	0		8.312	8.687	8.5	12.375	4.063			11.4639	11.456	0.00785714		11.5	11.858	-0.358		11.25	10.187	11.937	11.443	9.922	8.377		11.5	10.062	8.125	11.445	10.023	8.157		11.5	9.687	8.875	11.44	9.928	8.38		11.625	11.875	11.562	11.581	11.769	11.859
11.4639	8.375	0	0	0		8.375	8.75	8.5	12.375	4			11.4639	11.455	0.00885714		11.5	11.858	-0.358		11.25	10.187	11.937	11.443	9.922	8.382		11.5	10.062	8.125	11.444	10.022	8.161		11.5	9.687	8.875	11.44	9.928	8.381		11.625	11.875	11.562	11.581	11.768	11.859
11.4639	8.375	0	0	0		8.375	8.687	8.562	12.375	4			11.4639	11.455	0.00885714		11.5	11.858	-0.358		11.187	10.187	11.937	11.443	9.922	8.387		11.5	10.062	8.125	11.444	10.022	8.164		11.5	9.687	8.875	11.439	9.927	8.383		11.625	11.875	11.562	11.58	11.768	11.859
11.4639	8.375	0	0	0		8.375	8.687	8.5	12.312	3.937			11.4639	11.455	0.00885714		11.5	11.858	-0.358		11.25	10.187	11.875	11.442	9.921	8.392		11.5	10.062	8.125	11.443	10.021	8.167		11.5	9.687	8.875	11.439	9.927	8.384		11.625	11.875	11.562	11.58	11.768	11.859
11.4639	8.375	0	0	0		8.375	8.687	8.5	12.25	3.875			11.4639	11.454	0.00985714		11.5	11.858	-0.358		11.25	10.187	11.875	11.442	9.921	8.397		11.5	10.062	8.125	11.443	10.02	8.17		11.5	9.687	8.875	11.438	9.927	8.386		11.625	11.875	11.625	11.58	11.767	11.859
11.4639	8.312	0	0	0		8.312	8.687	8.437	12.062	3.75			11.4639	11.454	0.00985714		11.5	11.858	-0.358		11.25	10.187	11.812	11.441	9.921	8.391		11.5	10.062	8.125	11.442	10.02	8.173		11.5	9.687	8.875	11.438	9.926	8.383		11.625	11.875	11.625	11.579	11.767	11.859
11.4639	8.312	0	0	0		8.312	8.687	8.437	12.062	3.75			11.4639	11.453	0.0108571		11.5	11.858	-0.358		11.25	10.187	11.812	11.441	9.92	8.385		11.5	10.062	8.125	11.442	10.019	8.176		11.5	9.687	8.812	11.437	9.926	8.381		11.625	11.875	11.562	11.579	11.767	11.859
11.4639	8.25	0	0	0		8.25	8.625	8.437	12	3.75			11.4639	11.453	0.0108571		11.5	11.858	-0.358		11.25	10.187	11.75	11.44	9.92	8.379		11.5	10.062	8.125	11.441	10.019	8.178		11.5	9.687	8.875	11.437	9.926	8.378		11.625	11.875	11.625	11.578	11.767	11.859
11.4639	8.25	0	0	0		8.25	8.687	8.437	12.062	3.812			11.4639	11.452	0.0118571		11.5	11.858	-0.358		11.25	10.187	11.75	11.44	9.92	8.374		11.5	10.062	8.125	11.441	10.018	8.181		11.5	9.687	8.812	11.436	9.925	8.376		11.625	11.875	11.562	11.578	11.766	11.859
11.4639	8.312	0	0	0		8.312	8.625	8.437	12.125	3.813			11.4639	11.452	0.0118571		11.5	11.858	-0.358		11.25	10.187	11.75	11.439	9.919	8.368		11.5	10.062	8.187	11.441	10.017	8.184		11.5	9.687	8.812	11.436	9.925	8.373		11.625	11.875	11.625	11.578	11.766	11.859
11.4639	8.25	0	0	0		8.25	8.5	8.375	12.062	3.812			11.4639	11.451	0.0128571		11.5	11.858	-0.358		11.25	10.187	11.75	11.439	9.919	8.362		11.5	10.062	8.125	11.44	10.017	8.186		11.5	9.687	8.812	11.435	9.925	8.371		11.625	11.875	11.562	11.577	11.766	11.858
11.4639	8.187	0	0	0		8.187	8.5	8.187	11.875	3.688			11.4639	11.451	0.0128571		11.5	11.858	-0.358		11.25	10.187	11.687	11.438	9.919	8.356		11.5	10.062	8.125	11.44	10.016	8.189		11.5	9.687	8.75	11.435	9.924	8.368		11.625	11.875	11.562	11.577	11.765	11.858
11.4639	8.187	0	0	0		8.187	8.562	8.187	11.937	3.75			11.4639	11.45	0.0138571		11.5	11.858	-0.358		11.25	10.187	11.687	11.438	9.919	8.351		11.5	10.062	8.187	11.439	10.016	8.192		11.5	9.687	8.75	11.434	9.924	8.366		11.625	11.875	11.562	11.576	11.765	11.858
11.4639	8.187	0	0	0		8.187	8.687	8.25	11.875	3.688			11.4639	11.45	0.0138571		11.5	11.858	-0.358		11.25	10.187	11.687	11.437	9.918	8.345		11.5	10.062	8.187	11.439	10.015	8.194		11.5	9.687	8.75	11.434	9.924	8.363		11.625	11.875	11.562	11.576	11.765	11.858
11.4639	8.187	0	0	0		8.187	8.625	8.312	11.937	3.75			11.4639	11.449	0.0148571		11.5	11.858	-0.358		11.187	10.187	11.687	11.437	9.918	8.339		11.5	10.062	8.187	11.438	10.014	8.197		11.5	9.687	8.75	11.433	9.923	8.361		11.625	11.875	11.562	11.575	11.765	11.858
11.4639	8.25	0	0	0		8.25	8.625	8.437	12.062	3.812			11.4639	11.449	0.0148571		11.5	11.858	-0.358		11.25	10.187	11.687	11.436	9.918	8.333		11.5	10.062	8.187	11.438	10.014	8.2		11.5	9.687	8.75	11.433	9.923	8.358		11.625	11.875	11.562	11.575	11.764	11.858
11.4639	8.312	0	0	0		8.312	8.687	8.437	12.125	3.813			11.4639	11.448	0.0158571		11.5	11.858	-0.358		11.25	10.187	11.687	11.436	9.917	8.327		11.5	10.062	8.187	11.437	10.013	8.202		11.5	9.687	8.75	11.433	9.923	8.356		11.625	11.875	11.625	11.575	11.764	11.858
11.4639	8.312	0	0	0		8.312	8.687	8.375	12.062	3.75			11.4639	11.448	0.0158571		11.5	11.858	-0.358		11.25	10.187	11.687	11.435	9.917	8.321		11.5	10.062	8.187	11.437	10.013	8.204		11.5	9.687	8.75	11.432	9.922	8.351		11.625	11.875	11.562	11.574	11.764	11.858
11.4639	8.312	0	0	0		8.312	8.687	8.312	11.937	3.625			11.4639	11.447	0.0168571		11.5	11.858	-0.358		11.187	10.187	11.687	11.435	9.917	8.314		11.5	10.062	8.187	11.436	10.012	8.206		11.5	9.687	8.75	11.432	9.922	8.347		11.625	11.875	11.625	11.574	11.763	11.858
11.4639	8.25	0	0	0		8.25	8.75	8.25	11.875	3.625			11.4639	11.447	0.0168571		11.5	11.858	-0.358		11.187	10.187	11.625	11.434	9.917	8.308		11.5	10.062	8.187	11.436	10.012	8.208		11.5	9.687	8.75	11.431	9.922	8.343		11.625	11.875	11.562	11.573	11.763	11.858
11.4729	8.187	0	0	0		8.187	8.625	8.187	11.937	3.75			11.4729	11.446	0.0268571		11.5	11.858	-0.358		11.187	10.187	11.687	11.434	9.916	8.301		11.5	10.062	8.187	11.436	10.011	8.21		11.5	9.687	8.687	11.431	9.921	8.339		11.625	11.875	11.562	11.573	11.763	11.858
11.4639	8.187	0	0	0		8.187	8.625	8.25	12	3.813			11.4639	11.446	0.0178571		11.5	11.857	-0.357		11.25	10.187	11.625	11.433	9.916	8.295		11.5	10.062	8.187	11.435	10.011	8.212		11.5	9.687	8.75	11.43	9.921	8.334		11.625	11.875	11.562	11.573	11.763	11.857
11.4639	8.312	0	0	0		8.312	8.562	8.375	12.125	3.813			11.4639	11.445	0.0188571		11.5	11.857	-0.357		11.25	10.187	11.687	11.433	9.916	8.289		11.5	10.062	8.187	11.435	10.01	8.214		11.5	9.687	8.75	11.43	9.921	8.33		11.625	11.875	11.562	11.572	11.762	11.857
11.4639	8.25	0	0	0		8.25	8.625	8.312	12	3.75			11.4639	11.445	0.0188571		11.5	11.857	-0.357		11.187	10.25	11.687	11.433	9.916	8.282		11.5	10.062	8.187	11.434	10.009	8.215		11.5	9.687	8.75	11.429	9.92	8.326		11.625	11.875	11.562	11.572	11.762	11.857
11.4639	8.25	0	0	0		8.25	8.5	8.375	12.125	3.875			11.4639	11.444	0.0198571		11.5	11.857	-0.357		11.187	10.187	11.687	11.432	9.915	8.276		11.5	10.062	8.187	11.434	10.009	8.217		11.5	9.687	8.75	11.429	9.92	8.321		11.625	11.875	11.562	11.571	11.762	11.857
11.4639	8.187	0	0	0		8.187	8.375	8.437	12.187	4			11.4639	11.444	0.0198571		11.5	11.857	-0.357		11.187	10.187	11.687	11.432	9.915	8.269		11.5	10.062	8.187	11.433	10.008	8.219		11.5	9.687	8.75	11.428	9.92	8.317		11.625	11.812	11.562	11.571	11.761	11.857
11.4639	8.187	0	0	0		8.187	8.375	8.5	12.25	4.063			11.4639	11.443	0.0208571		11.5	11.857	-0.357		11.25	10.187	11.687	11.431	9.915	8.263		11.5	10.062	8.187	11.433	10.008	8.221		11.5	9.687	8.75	11.428	9.92	8.313		11.625	11.875	11.562	11.571	11.761	11.857
11.4639	8.25	0	0	0		8.25	8.5	8.375	12.187	3.937			11.4639	11.443	0.0208571		11.5	11.857	-0.357		11.25	10.25	11.687	11.431	9.915	8.256		11.5	10.062	8.187	11.432	10.007	8.223		11.5	9.687	8.75	11.427	9.919	8.309		11.625	11.875	11.562	11.57	11.761	11.857
11.4639	8.187	0	0	0		8.187	8.437	8.437	12.25	4.063			11.4639	11.442	0.0218571		11.5	11.857	-0.357		11.25	10.187	11.687	11.43	9.914	8.25		11.5	10.062	8.187	11.432	10.007	8.225		11.5	9.687	8.75	11.427	9.919	8.304		11.625	11.875	11.562	11.57	11.761	11.857
11.4639	8.25	0	0	0		8.25	8.5	8.437	12	3.75			11.4639	11.442	0.0218571		11.5	11.857	-0.357		11.25	10.25	11.687	11.43	9.914	8.245		11.5	10.062	8.187	11.431	10.006	8.225		11.5	9.687	8.75	11.426	9.919	8.3		11.625	11.875	11.562	11.569	11.76	11.857
11.4639	8.25	0	0	0		8.25	8.5	8.562	11.937	3.687			11.4639	11.441	0.0228571		11.5	11.857	-0.357		11.25	10.25	11.687	11.429	9.914	8.24		11.5	10.062	8.25	11.431	10.006	8.226		11.5	9.687	8.75	11.426	9.919	8.295		11.625	11.875	11.562	11.569	11.76	11.857
11.4639	8.125	0	0	0		8.125	8.5	8.625	12.062	3.937			11.4639	11.441	0.0228571		11.5	11.857	-0.357		11.25	10.25	11.687	11.429	9.914	8.235		11.5	10.062	8.25	11.43	10.005	8.226		11.5	9.687	8.812	11.425	9.918	8.291		11.625	11.875	11.562	11.569	11.76	11.857
11.4639	8.125	0	0	0		8.125	8.562	8.562	12.187	4.062			11.4639	11.44	0.0238571		11.5	11.857	-0.357		11.25	10.25	11.687	11.428	9.914	8.23		11.5	10.062	8.25	11.43	10.005	8.227		11.5	9.687	8.812	11.425	9.918	8.286		11.625	11.875	11.562	11.568	11.76	11.857
11.4639	8.25	0	0	0		8.25	8.562	8.562	12.312	4.062			11.4639	11.44	0.0238571		11.562	11.857	-0.295		11.25	10.25	11.75	11.428	9.913	8.225		11.5	10.062	8.25	11.429	10.004	8.227		11.5	9.687	8.812	11.425	9.918	8.281		11.625	11.875	11.562	11.568	11.759	11.856
11.4639	8.312	0	0	0		8.312	8.625	8.5	12.375	4.063			11.4639	11.439	0.0248571		11.5	11.857	-0.357		11.25	10.25	11.75	11.427	9.913	8.22		11.5	10.062	8.25	11.429	10.004	8.228		11.5	9.687	8.812	11.424	9.918	8.277		11.625	11.875	11.562	11.567	11.759	11.856
11.4639	8.25	0	0	0		8.25	8.625	8.375	12.187	3.937			11.4639	11.439	0.0248571		11.5	11.857	-0.357		11.25	10.25	11.75	11.427	9.913	8.215		11.5	10.062	8.25	11.429	10.003	8.228		11.5	9.687	8.75	11.424	9.917	8.272		11.625	11.875	11.562	11.567	11.759	11.856
11.4639	8.187	0	0	0		8.187	8.562	8.375	12.062	3.875			11.4639	11.438	0.0258571		11.562	11.857	-0.295		11.25	10.25	11.75	11.426	9.913	8.21		11.5	10.062	8.25	11.428	10.003	8.229		11.5	9.687	8.75	11.423	9.917	8.268		11.625	11.875	11.562	11.566	11.758	11.856
11.4639	8.187	0	0	0		8.187	8.437	8.437	12.062	3.875			11.4639	11.438	0.0258571		11.5	11.857	-0.357		11.25	10.25	11.687	11.426	9.912	8.206		11.5	10.062	8.25	11.428	10.002	8.229		11.5	9.687	8.75	11.423	9.917	8.263		11.625	11.875	11.562	11.566	11.758	11.856
11.4639	8.125	0	0	0		8.125	8.375	8.437	12.125	4			11.4639	11.437	0.0268571		11.5	11.857	-0.357		11.25	10.25	11.687	11.425	9.912	8.201		11.5	10	8.25	11.427	10.002	8.23		11.5	9.687	8.75	11.422	9.917	8.259		11.625	11.875	11.562	11.566	11.758	11.856
11.4639	8.187	0	0	0		8.187	8.375	8.437	12.125	3.938			11.4639	11.437	0.0268571		11.5	11.856	-0.356		11.187	10.25	11.687	11.425	9.912	8.196		11.5	10.062	8.25	11.427	10.001	8.23		11.5	9.687	8.75	11.422	9.916	8.254		11.625	11.875	11.562	11.565	11.758	11.856
11.4639	8.25	0	0	0		8.25	8.437	8.437	12.062	3.812			11.4639	11.436	0.0278571		11.5	11.856	-0.356		11.25	10.25	11.625	11.424	9.912	8.191		11.5	10.062	8.25	11.426	10.001	8.231		11.5	9.687	8.75	11.421	9.916	8.25		11.625	11.875	11.562	11.565	11.757	11.856
11.4639	8.25	0	0	0		8.25	8.312	8.5	12.062	3.812			11.4639	11.435	0.0288571		11.5	11.856	-0.356		11.25	10.25	11.625	11.424	9.912	8.186		11.5	10.062	8.25	11.426	10	8.231		11.5	9.687	8.75	11.421	9.916	8.245		11.625	11.875	11.562	11.564	11.757	11.856
11.4639	8.125	0	0	0		8.125	8.312	8.5	12.125	4			11.4639	11.435	0.0288571		11.5	11.856	-0.356		11.25	10.25	11.625	11.423	9.911	8.181		11.5	10.062	8.25	11.425	10	8.232		11.5	9.75	8.75	11.42	9.916	8.24		11.625	11.875	11.562	11.564	11.757	11.856
11.4639	8.125	0	0	0		8.125	8.312	8.562	12.062	3.937			11.4639	11.434	0.0298571		11.5	11.856	-0.356		11.25	10.25	11.562	11.423	9.911	8.176		11.5	10.062	8.25	11.425	9.999	8.232		11.5	9.75	8.812	11.42	9.915	8.236		11.625	11.875	11.562	11.564	11.756	11.856
11.4639	8.125	0	0	0		8.125	8.437	8.562	12	3.875			11.4639	11.434	0.0298571		11.5	11.856	-0.356		11.25	10.25	11.562	11.423	9.911	8.171		11.5	10.062	8.25	11.424	9.999	8.233		11.5	9.687	8.812	11.419	9.915	8.231		11.625	11.812	11.562	11.563	11.756	11.856
11.4639	8.25	0	0	0		8.25	8.562	8.437	11.937	3.687			11.4639	11.433	0.0308571		11.5	11.856	-0.356		11.25	10.25	11.562	11.422	9.911	8.166		11.5	10.062	8.25	11.424	9.998	8.233		11.5	9.687	8.75	11.419	9.915	8.227		11.625	11.875	11.562	11.563	11.756	11.855
11.4639	8.187	0	0	0		8.187	8.625	8.375	11.875	3.688			11.4639	11.433	0.0308571		11.5	11.856	-0.356		11.25	10.25	11.5	11.422	9.911	8.161		11.5	10.062	8.25	11.423	9.998	8.234		11.5	9.75	8.75	11.418	9.915	8.222		11.625	11.875	11.562	11.562	11.756	11.855
11.4639	8.187	0	0	0		8.187	8.562	8.312	11.812	3.625			11.4639	11.432	0.0318571		11.5	11.856	-0.356		11.25	10.25	11.5	11.421	9.91	8.156		11.5	10.062	8.25	11.423	9.997	8.234		11.5	9.687	8.75	11.418	9.914	8.218		11.625	11.875	11.562	11.562	11.755	11.855
11.4639	8.125	0	0	0		8.125	8.625	8.25	11.75	3.625			11.4639	11.432	0.0318571		11.5	11.856	-0.356		11.25	10.25	11.5	11.421	9.91	8.151		11.5	10	8.25	11.423	9.997	8.235		11.5	9.75	8.75	11.417	9.914	8.213		11.625	11.812	11.562	11.561	11.755	11.855
11.4639	8.25	0	0	0		8.25	8.625	8.375	11.75	3.5			11.4639	11.431	0.0328571		11.5	11.856	-0.356		11.25	10.25	11.5	11.42	9.91	8.146		11.5	10	8.25	11.422	9.996	8.235		11.5	9.75	8.75	11.417	9.914	8.208		11.625	11.875	11.562	11.561	11.755	11.855
11.4639	8.062	0	0	0		8.062	8.437	8.437	11.875	3.813			11.4639	11.431	0.0328571		11.5	11.856	-0.356		11.25	10.25	11.5	11.42	9.91	8.141		11.5	10.062	8.25	11.422	9.996	8.236		11.5	9.75	8.75	11.417	9.914	8.204		11.625	11.875	11.562	11.561	11.755	11.855
11.4639	8.062	0	0	0		8.062	8.375	8.5	11.937	3.875			11.4639	11.43	0.0338571		11.5	11.856	-0.356		11.187	10.25	11.5	11.419	9.91	8.136		11.5	10.062	8.25	11.421	9.995	8.236		11.5	9.75	8.75	11.416	9.913	8.199		11.625	11.812	11.562	11.56	11.754	11.855
11.4639	8.125	0	0	0		8.125	8.375	8.5	12	3.875			11.4639	11.43	0.0338571		11.5	11.856	-0.356		11.25	10.25	11.5	11.419	9.909	8.135		11.5	10.062	8.312	11.421	9.995	8.237		11.5	9.75	8.75	11.416	9.913	8.197		11.625	11.875	11.562	11.56	11.754	11.855
11.4639	8.25	0	0	0		8.25	8.437	8.437	11.562	3.312			11.4639	11.429	0.0348571		11.5	11.855	-0.355		11.187	10.25	11.5	11.418	9.909	8.138		11.5	10.062	8.25	11.42	9.994	8.237		11.5	9.687	8.75	11.415	9.913	8.198		11.625	11.875	11.562	11.559	11.754	11.855
11.4639	8.312	0	0	0		8.312	8.5	8.437	11.187	2.875			11.4639	11.429	0.0348571		11.5	11.855	-0.355		11.25	10.312	11.5	11.418	9.909	8.141		11.5	10.062	8.25	11.42	9.994	8.237		11.5	9.687	8.75	11.415	9.913	8.198		11.625	11.875	11.562	11.559	11.753	11.855
11.4639	8.375	0	0	0		8.375	8.5	8.5	11.5	3.125			11.4639	11.429	0.0348571		11.5	11.855	-0.355		11.187	10.312	11.5	11.417	9.909	8.144		11.5	10.062	8.312	11.419	9.994	8.237		11.5	9.687	8.75	11.414	9.913	8.199		11.625	11.875	11.562	11.559	11.753	11.855
11.4639	8.312	0	0	0		8.312	8.5	8.5	11.75	3.438			11.4639	11.428	0.0358571		11.5	11.855	-0.355		11.25	10.312	11.562	11.417	9.909	8.147		11.5	10.062	8.25	11.419	9.993	8.238		11.5	9.687	8.75	11.414	9.912	8.2		11.625	11.875	11.562	11.558	11.753	11.855
11.4639	8.312	0	0	0		8.312	8.437	8.5	11.875	3.563			11.4639	11.428	0.0358571		11.5	11.855	-0.355		11.25	10.312	11.562	11.416	9.909	8.151		11.5	10.062	8.312	11.418	9.993	8.238		11.5	9.687	8.812	11.413	9.912	8.201		11.625	11.875	11.562	11.558	11.753	11.855
11.4639	8.375	0	0	0		8.375	8.5	8.5	11.937	3.562			11.4639	11.427	0.0368571		11.5	11.855	-0.355		11.25	10.312	11.562	11.416	9.908	8.154		11.5	10.062	8.312	11.418	9.992	8.238		11.5	9.75	8.75	11.413	9.912	8.201		11.625	11.875	11.562	11.557	11.752	11.854
11.4639	8.25	0	0	0		8.25	8.5	8.375	11.875	3.625			11.4639	11.427	0.0368571		11.5	11.855	-0.355		11.25	10.312	11.562	11.415	9.908	8.157		11.5	10.062	8.312	11.417	9.992	8.239		11.5	9.75	8.75	11.412	9.912	8.202		11.625	11.875	11.562	11.557	11.752	11.854
11.4639	8.187	0	0	0		8.187	8.562	8.312	11.812	3.625			11.4639	11.427	0.0368571		11.5	11.855	-0.355		11.25	10.312	11.562	11.415	9.908	8.16		11.5	10.062	8.312	11.417	9.991	8.239		11.5	9.75	8.75	11.412	9.912	8.203		11.625	11.875	11.562	11.556	11.752	11.854
11.4639	8.25	0	0	0		8.25	8.375	8.375	11.812	3.562			11.4639	11.426	0.0378571		11.5	11.855	-0.355		11.25	10.312	11.5	11.414	9.908	8.163		11.5	10.062	8.312	11.416	9.991	8.239		11.5	9.687	8.75	11.411	9.911	8.204		11.625	11.875	11.562	11.556	11.751	11.854
11.4639	8.25	0	0	0		8.25	8.5	8.375	11.812	3.562			11.4639	11.426	0.0378571		11.5	11.855	-0.355		11.25	10.312	11.5	11.414	9.908	8.167		11.5	10.062	8.312	11.416	9.99	8.24		11.5	9.75	8.75	11.411	9.911	8.205		11.625	11.812	11.562	11.556	11.751	11.854
11.4639	8.25	0	0	0		8.25	8.562	8.375	11.812	3.562			11.4639	11.425	0.0388571		11.5	11.855	-0.355		11.25	10.312	11.5	11.413	9.907	8.17		11.5	10.062	8.312	11.415	9.99	8.24		11.5	9.75	8.75	11.41	9.911	8.205		11.625	11.812	11.562	11.555	11.751	11.854
11.4639	8.25	0	0	0		8.25	8.562	8.375	11.75	3.5			11.4639	11.425	0.0388571		11.5	11.855	-0.355		11.25	10.312	11.437	11.413	9.907	8.173		11.5	10.062	8.312	11.415	9.99	8.24		11.5	9.75	8.75	11.41	9.911	8.206		11.625	11.812	11.562	11.555	11.751	11.854
11.4639	8.312	0	0	0		8.312	8.625	8.437	11.812	3.5			11.4639	11.425	0.0388571		11.5	11.855	-0.355		11.25	10.312	11.437	11.412	9.907	8.176		11.5	10.062	8.312	11.415	9.989	8.241		11.5	9.75	8.75	11.409	9.911	8.207		11.625	11.812	11.562	11.554	11.75	11.854
11.4639	8.375	0	0	0		8.375	8.687	8.5	11.875	3.5			11.4639	11.424	0.0398571		11.5	11.855	-0.355		11.187	10.312	11.437	11.412	9.907	8.18		11.5	10.062	8.312	11.414	9.989	8.241		11.5	9.75	8.75	11.409	9.91	8.208		11.625	11.875	11.562	11.554	11.75	11.854
11.4639	8.375	0	0	0		8.375	8.687	8.5	11.937	3.562			11.4639	11.424	0.0398571		11.5	11.855	-0.355		11.25	10.312	11.437	11.412	9.907	8.183		11.5	10.062	8.312	11.414	9.988	8.241		11.5	9.75	8.75	11.408	9.91	8.208		11.625	11.875	11.562	11.554	11.75	11.854
11.4639	8.437	0	0	0		8.437	8.562	8.562	11.937	3.5			11.4639	11.423	0.0408571		11.5	11.855	-0.355		11.187	10.312	11.437	11.411	9.907	8.186		11.5	10.062	8.312	11.413	9.988	8.242		11.5	9.75	8.75	11.408	9.91	8.209		11.625	11.812	11.562	11.553	11.75	11.854
11.4639	8.375	0	0	0		8.375	8.625	8.5	11.937	3.562			11.4639	11.423	0.0408571		11.5	11.855	-0.355		11.25	10.312	11.5	11.411	9.906	8.189		11.5	10.062	8.312	11.413	9.987	8.242		11.5	9.75	8.75	11.408	9.91	8.21		11.625	11.875	11.562	11.553	11.749	11.854
11.4639	8.312	0	0	0		8.312	8.562	8.375	11.75	3.438			11.4639	11.423	0.0408571		11.5	11.855	-0.355		11.187	10.312	11.437	11.41	9.906	8.257		11.5	10.062	8.312	11.412	9.987	8.242		11.5	9.75	8.687	11.407	9.91	8.214		11.625	11.812	11.562	11.552	11.749	11.853
11.4639	8.312	0	0	0		8.312	8.625	8.375	11.625	3.313			11.4639	11.423	0.0408571		11.5	11.855	-0.355		11.25	10.312	11.437	11.41	9.906	8.278		11.5	10.062	8.312	11.412	9.987	8.243		11.5	9.75	8.687	11.407	9.909	8.222		11.625	11.812	11.562	11.552	11.749	11.853
11.4639	8.312	0	0	0		8.312	8.625	8.375	11.687	3.375			11.4639	11.423	0.0408571		11.5	11.855	-0.355		11.25	10.312	11.437	11.409	9.906	8.288		11.5	10.062	8.312	11.411	9.986	8.243		11.5	9.75	8.687	11.406	9.909	8.228		11.625	11.875	11.562	11.551	11.748	11.853
11.4639	8.312	0	0	0		8.312	8.625	8.375	11.5	3.188			11.4639	11.422	0.0418571		11.5	11.855	-0.355		11.25	10.312	11.375	11.409	9.906	8.298		11.5	10.062	8.312	11.411	9.986	8.244		11.5	9.75	8.687	11.406	9.909	8.235		11.625	11.812	11.562	11.551	11.748	11.853
11.4639	8.25	0	0	0		8.25	8.5	8.312	11.5	3.25			11.4639	11.422	0.0418571		11.5	11.855	-0.355		11.25	10.312	11.375	11.408	9.906	8.298		11.5	10.062	8.312	11.41	9.985	8.244		11.5	9.75	8.687	11.405	9.909	8.239		11.625	11.812	11.625	11.551	11.748	11.853
11.4639	8.187	0	0	0		8.187	8.437	8.25	11.437	3.25			11.4639	11.421	0.0428571		11.5	11.855	-0.355		11.25	10.312	11.312	11.408	9.905	8.298		11.5	10.062	8.312	11.41	9.985	8.245		11.5	9.75	8.625	11.405	9.909	8.243		11.625	11.812	11.562	11.55	11.748	11.853
11.4639	8.187	0	0	0		8.187	8.375	8.25	11.437	3.25			11.4639	11.421	0.0428571		11.5	11.855	-0.355		11.25	10.312	11.312	11.407	9.905	8.298		11.5	10.062	8.312	11.409	9.984	8.245		11.5	9.75	8.625	11.404	9.908	8.248		11.625	11.812	11.562	11.55	11.747	11.853
11.4639	8.25	0	0	0		8.25	8.312	8.312	11.5	3.25			11.4639	11.421	0.0428571		11.5	11.855	-0.355		11.25	10.312	11.312	11.407	9.905	8.297		11.5	10.062	8.312	11.409	9.984	8.246		11.5	9.75	8.625	11.404	9.908	8.252		11.625	11.812	11.562	11.549	11.747	11.853
11.4639	8.187	0	0	0		8.187	8.375	8.25	11.375	3.188			11.4639	11.42	0.0438571		11.5	11.855	-0.355		11.25	10.312	11.25	11.406	9.905	8.283		11.5	10.062	8.312	11.408	9.983	8.246		11.5	9.75	8.625	11.403	9.908	8.249		11.625	11.875	11.562	11.549	11.747	11.853
11.4639	8.187	0	0	0		8.187	8.312	8.187	11.312	3.125			11.4639	11.419	0.0448571		11.5	11.855	-0.355		11.187	10.312	11.25	11.406	9.905	8.266		11.5	10.062	8.312	11.408	9.983	8.247		11.5	9.75	8.625	11.403	9.908	8.244		11.625	11.812	11.562	11.549	11.747	11.853
11.4639	8.187	0	0	0		8.187	8.312	8.187	11.312	3.125			11.4639	11.419	0.0448571		11.5	11.855	-0.355		11.25	10.312	11.187	11.405	9.905	8.249		11.5	10.062	8.312	11.408	9.983	8.247		11.5	9.75	8.562	11.402	9.908	8.239		11.625	11.875	11.562	11.548	11.746	11.853
11.4639	8.125	0	0	0		8.125	8.25	8.062	11.125	3.063			11.4639	11.418	0.0458571		11.5	11.854	-0.354		11.25	10.312	11.125	11.405	9.904	8.231		11.5	10.062	8.312	11.407	9.982	8.247		11.5	9.75	8.562	11.402	9.907	8.234		11.625	11.875	11.562	11.548	11.746	11.853
11.4639	8.187	0	0	0		8.187	8.25	8.062	11.187	3.125			11.4639	11.418	0.0458571		11.5	11.854	-0.354		11.25	10.312	11.125	11.404	9.904	8.214		11.5	10.062	8.312	11.407	9.982	8.248		11.5	9.75	8.562	11.401	9.907	8.229		11.625	11.812	11.562	11.547	11.746	11.853
11.4639	8.187	0	0	0		8.187	8.312	8.125	11.187	3.062			11.4639	11.417	0.0468571		11.5	11.854	-0.354		11.25	10.375	11.125	11.404	9.904	8.197		11.5	10.062	8.312	11.406	9.981	8.248		11.5	9.75	8.562	11.401	9.907	8.224		11.625	11.812	11.562	11.547	11.745	11.852
11.4639	8.187	0	0	0		8.187	8.25	8.25	11.25	3.063			11.4639	11.416	0.0478571		11.5	11.854	-0.354		11.25	10.312	11.062	11.403	9.904	8.179		11.5	10.062	8.312	11.406	9.981	8.249		11.5	9.75	8.562	11.4	9.907	8.219		11.625	11.812	11.562	11.546	11.745	11.852
11.4639	8.062	0	0	0		8.062	8.125	8.25	11.25	3.188			11.4639	11.416	0.0478571		11.5	11.854	-0.354		11.187	10.375	11.062	11.403	9.904	8.162		11.5	10.062	8.312	11.405	9.981	8.249		11.5	9.75	8.562	11.4	9.907	8.214		11.625	11.875	11.562	11.546	11.745	11.852
11.4639	8.125	0	0	0		8.125	8.187	8.312	11.125	3			11.4639	11.415	0.0488571		11.5	11.854	-0.354		11.25	10.375	11	11.402	9.904	8.165		11.5	10.062	8.312	11.405	9.98	8.25		11.5	9.75	8.562	11.399	9.906	8.215		11.625	11.875	11.562	11.546	11.745	11.852
11.4639	8.125	0	0	0		8.125	8.25	8.375	11.25	3.125			11.4639	11.415	0.0488571		11.5	11.854	-0.354		11.25	10.375	11	11.402	9.903	8.181		11.5	10.062	8.312	11.404	9.98	8.25		11.5	9.75	8.562	11.399	9.906	8.219		11.625	11.812	11.562	11.545	11.744	11.852
11.4639	8.125	0	0	0		8.125	8.25	8.375	11.312	3.187			11.4639	11.415	0.0488571		11.5	11.854	-0.354		11.187	10.375	11	11.402	9.903	8.198		11.5	10.062	8.312	11.404	9.979	8.251		11.5	9.75	8.562	11.399	9.906	8.224		11.625	11.812	11.562	11.545	11.744	11.852
11.4639	8.125	0	0	0		8.125	8.312	8.375	11.375	3.25			11.4639	11.415	0.0488571		11.5	11.854	-0.354		11.187	10.375	11	11.401	9.903	8.214		11.5	10.062	8.312	11.403	9.979	8.251		11.5	9.75	8.625	11.398	9.906	8.228		11.625	11.812	11.562	11.544	11.744	11.852
11.4639	8.187	0	0	0		8.187	8.25	8.312	11.375	3.188			11.4639	11.414	0.0498571		11.5	11.854	-0.354		11.187	10.375	11	11.401	9.903	8.23		11.5	10.062	8.312	11.403	9.979	8.252		11.5	9.75	8.625	11.398	9.906	8.233		11.625	11.812	11.562	11.544	11.744	11.852
11.4639	8.187	0	0	0		8.187	8.375	8.25	11.375	3.188			11.4639	11.414	0.0498571		11.5	11.854	-0.354		11.25	10.375	11	11.4	9.903	8.246		11.5	10.062	8.375	11.402	9.978	8.253		11.5	9.75	8.625	11.397	9.906	8.237		11.625	11.812	11.562	11.544	11.743	11.852
11.4639	8.187	0	0	0		8.187	8.375	8.312	11.25	3.063			11.4639	11.414	0.0498571		11.5	11.854	-0.354		11.25	10.375	11	11.4	9.903	8.262		11.5	10.062	8.312	11.402	9.978	8.253		11.5	9.75	8.625	11.397	9.905	8.242		11.625	11.812	11.562	11.543	11.743	11.852
11.4639	8.25	0	0	0		8.25	8.437	8.375	11.25	3			11.4639	11.414	0.0498571		11.5	11.854	-0.354		11.25	10.375	11	11.399	9.902	8.278		11.5	10.062	8.312	11.401	9.977	8.254		11.5	9.75	8.625	11.396	9.905	8.246		11.625	11.812	11.562	11.543	11.743	11.852
11.455	8.312	0	0	0		8.312	8.5	8.375	11.375	3.063			11.455	11.413	0.042		11.5	11.854	-0.354		11.25	10.375	11	11.399	9.902	8.288		11.5	10.062	8.312	11.401	9.977	8.254		11.5	9.75	8.625	11.396	9.905	8.25		11.625	11.812	11.562	11.542	11.742	11.852
11.4639	8.25	0	0	0		8.25	8.5	8.375	11.25	3			11.4639	11.413	0.0508571		11.5	11.854	-0.354		11.187	10.375	11	11.398	9.902	8.289		11.5	10.062	8.375	11.401	9.977	8.255		11.5	9.75	8.625	11.395	9.905	8.252		11.625	11.812	11.562	11.542	11.742	11.851
11.4639	8.25	0	0	0		8.25	8.5	8.312	11.187	2.937			11.4639	11.412	0.0518571		11.5	11.854	-0.354		11.25	10.375	10.937	11.398	9.902	8.289		11.5	10.062	8.375	11.4	9.976	8.256		11.5	9.75	8.625	11.395	9.905	8.254		11.625	11.875	11.562	11.541	11.742	11.851
11.4639	8.25	0	0	0		8.25	8.375	8.25	11.125	2.875			11.4639	11.412	0.0518571		11.5	11.854	-0.354		11.25	10.375	10.937	11.397	9.902	8.29		11.5	10.062	8.375	11.4	9.976	8.256		11.5	9.75	8.562	11.394	9.905	8.257		11.625	11.812	11.562	11.541	11.742	11.851
11.4639	8.187	0	0	0		8.187	8.375	8.187	11.125	2.938			11.4639	11.412	0.0518571		11.5	11.854	-0.354		11.187	10.375	10.937	11.397	9.902	8.29		11.5	10.062	8.375	11.399	9.976	8.257		11.5	9.75	8.562	11.394	9.904	8.259		11.625	11.812	11.562	11.541	11.741	11.851
11.4639	8.187	0	0	0		8.187	8.25	8.187	10.937	2.75			11.4639	11.411	0.0528571		11.5	11.854	-0.354		11.25	10.375	10.937	11.396	9.901	8.291		11.5	10.062	8.375	11.399	9.975	8.258		11.5	9.75	8.562	11.393	9.904	8.262		11.625	11.812	11.562	11.54	11.741	11.851
11.4639	8.187	0	0	0		8.187	8.25	8.25	11	2.813			11.4639	11.411	0.0528571		11.5	11.854	-0.354		11.25	10.375	10.875	11.396	9.901	8.291		11.5	10.062	8.312	11.398	9.975	8.259		11.5	9.75	8.562	11.393	9.904	8.264		11.625	11.812	11.562	11.54	11.741	11.851
11.4639	8.187	0	0	0		8.187	8.312	8.375	11.125	2.938			11.4639	11.41	0.0538571		11.5	11.854	-0.354		11.25	10.375	10.875	11.395	9.901	8.292		11.5	10.062	8.375	11.398	9.974	8.259		11.5	9.75	8.562	11.392	9.904	8.267		11.625	11.812	11.562	11.539	11.741	11.851
11.455	8.25	0	0	0		8.25	8.312	8.437	11.187	2.937			11.455	11.41	0.045		11.5	11.854	-0.354		11.25	10.375	10.937	11.395	9.901	8.293		11.5	10.062	8.375	11.397	9.974	8.26		11.5	9.75	8.625	11.392	9.904	8.269		11.625	11.812	11.562	11.539	11.74	11.851
11.4639	8.25	0	0	0		8.25	8.437	8.437	11.25	3			11.4639	11.41	0.0538571		11.5	11.854	-0.354		11.25	10.375	10.875	11.394	9.901	8.295		11.5	10.062	8.375	11.397	9.974	8.261		11.5	9.75	8.625	11.392	9.903	8.271		11.625	11.812	11.562	11.539	11.74	11.851
11.4639	8.25	0	0	0		8.25	8.5	8.375	11.187	2.937			11.4639	11.409	0.0548571		11.5	11.854	-0.354		11.187	10.375	10.937	11.394	9.901	8.297		11.5	10.062	8.375	11.396	9.973	8.262		11.5	9.75	8.625	11.391	9.903	8.274		11.625	11.812	11.562	11.538	11.74	11.851
11.4639	8.25	0	0	0		8.25	8.5	8.375	11.25	3			11.4639	11.409	0.0548571		11.5	11.854	-0.354		11.25	10.375	10.875	11.393	9.901	8.299		11.5	10.062	8.375	11.396	9.973	8.263		11.5	9.75	8.625	11.391	9.903	8.276		11.625	11.812	11.562	11.538	11.74	11.851
11.4639	8.25	0	0	0		8.25	8.5	8.375	11.25	3			11.4639	11.408	0.0558571		11.5	11.854	-0.354		11.25	10.375	10.937	11.393	9.9	8.301		11.5	10.062	8.375	11.395	9.973	8.264		11.5	9.75	8.625	11.39	9.903	8.278		11.625	11.812	11.562	11.537	11.739	11.851
11.4639	8.25	0	0	0		8.25	8.375	8.375	11.25	3			11.4639	11.408	0.0558571		11.5	11.854	-0.354		11.25	10.375	10.937	11.393	9.9	8.303		11.5	10.062	8.375	11.395	9.972	8.264		11.5	9.75	8.625	11.39	9.903	8.28		11.625	11.875	11.562	11.537	11.739	11.85
11.4639	8.25	0	0	0		8.25	8.375	8.375	11.25	3			11.4639	11.408	0.0558571		11.5	11.854	-0.354		11.25	10.375	10.875	11.392	9.9	8.305		11.5	10.062	8.375	11.394	9.972	8.265		11.5	9.75	8.625	11.389	9.903	8.283		11.625	11.812	11.562	11.536	11.739	11.85
11.4639	8.187	0	0	0		8.187	8.375	8.312	11.187	3			11.4639	11.407	0.0568571		11.5	11.854	-0.354		11.187	10.375	10.875	11.392	9.9	8.307		11.5	10.062	8.375	11.394	9.971	8.266		11.5	9.75	8.562	11.389	9.902	8.285		11.625	11.812	11.562	11.536	11.738	11.85
11.4461	8.25	0	0	0		8.25	8.437	8.312	11.187	2.937			11.4461	11.407	0.0391429		11.5	11.854	-0.354		11.187	10.375	10.875	11.391	9.9	8.309		11.5	10.062	8.375	11.393	9.971	8.267		11.5	9.75	8.562	11.388	9.902	8.287		11.625	11.812	11.562	11.536	11.738	11.85
11.4639	8.25	0	0	0		8.25	8.375	8.312	11.25	3			11.4639	11.407	0.0568571		11.5	11.854	-0.354		11.25	10.375	10.875	11.391	9.9	8.315		11.5	10.062	8.312	11.393	9.971	8.268		11.5	9.75	8.562	11.388	9.902	8.291		11.625	11.812	11.562	11.535	11.738	11.85
11.4639	8.25	0	0	0		8.25	8.312	8.375	11.25	3			11.4639	11.406	0.0578571		11.5	11.854	-0.354		11.25	10.437	10.875	11.39	9.9	8.32		11.5	10.062	8.375	11.393	9.97	8.27		11.5	9.75	8.625	11.387	9.902	8.296		11.625	11.812	11.562	11.535	11.738	11.85
11.4639	8.25	0	0	0		8.25	8.375	8.437	11.312	3.062			11.4639	11.406	0.0578571		11.5	11.854	-0.354		11.25	10.437	10.875	11.39	9.899	8.326		11.5	10.062	8.375	11.392	9.97	8.271		11.5	9.75	8.625	11.387	9.902	8.3		11.625	11.875	11.562	11.534	11.737	11.85
11.455	8.312	0	0	0		8.312	8.375	8.5	11.312	3			11.455	11.406	0.049		11.5	11.854	-0.354		11.25	10.437	10.875	11.389	9.899	8.332		11.5	10.062	8.375	11.392	9.97	8.272		11.5	9.75	8.625	11.386	9.902	8.304		11.625	11.812	11.562	11.534	11.737	11.85
11.455	8.312	0	0	0		8.312	8.375	8.5	11.25	2.938			11.455	11.405	0.05		11.5	11.854	-0.354		11.25	10.437	10.875	11.389	9.899	8.337		11.5	10.062	8.375	11.391	9.969	8.274		11.5	9.75	8.625	11.386	9.902	8.308		11.625	11.812	11.562	11.534	11.737	11.85
11.455	8.25	0	0	0		8.25	8.312	8.5	11.25	3			11.455	11.405	0.05		11.5	11.854	-0.354		11.187	10.437	10.812	11.388	9.899	8.343		11.5	10.062	8.375	11.391	9.969	8.275		11.5	9.75	8.625	11.385	9.901	8.313		11.625	11.812	11.562	11.533	11.737	11.85
11.455	8.25	0	0	0		8.25	8.312	8.5	11.25	3			11.455	11.405	0.05		11.5	11.854	-0.354		11.187	10.437	10.875	11.388	9.899	8.349		11.5	10.062	8.375	11.39	9.969	8.276		11.5	9.75	8.625	11.385	9.901	8.317		11.625	11.812	11.562	11.533	11.736	11.85
11.4639	8.187	0	0	0		8.187	8.312	8.5	11.25	3.063			11.4639	11.404	0.0598571		11.5	11.854	-0.354		11.25	10.437	10.812	11.387	9.899	8.354		11.5	10.062	8.375	11.39	9.968	8.278		11.5	9.75	8.625	11.385	9.901	8.321		11.625	11.875	11.562	11.532	11.736	11.85
11.455	8.25	0	0	0		8.25	8.312	8.5	11.25	3			11.455	11.404	0.051		11.5	11.854	-0.354		11.25	10.437	10.812	11.387	9.899	8.36		11.5	10.062	8.375	11.389	9.968	8.279		11.5	9.75	8.687	11.384	9.901	8.325		11.625	11.812	11.562	11.532	11.736	11.85
11.4639	8.25	0	0	0		8.25	8.312	8.5	11.25	3			11.4639	11.404	0.0598571		11.5	11.854	-0.354		11.187	10.437	10.812	11.386	9.898	8.366		11.5	10.062	8.375	11.389	9.968	8.28		11.5	9.75	8.687	11.384	9.901	8.33		11.625	11.812	11.562	11.532	11.736	11.849
11.4639	8.25	0	0	0		8.25	8.312	8.375	11.25	3			11.4639	11.403	0.0608571		11.5	11.854	-0.354		11.187	10.437	10.812	11.386	9.898	8.372		11.5	10.062	8.375	11.388	9.967	8.282		11.5	9.75	8.625	11.383	9.901	8.334		11.625	11.812	11.562	11.531	11.735	11.849
11.4639	8.312	0	0	0		8.312	8.375	8.375	11.25	2.938			11.4639	11.403	0.0608571		11.5	11.854	-0.354		11.187	10.437	10.812	11.386	9.898	8.377		11.5	10.062	8.375	11.388	9.967	8.283		11.5	9.75	8.625	11.383	9.901	8.338		11.625	11.812	11.562	11.531	11.735	11.849
11.4639	8.312	0	0	0		8.312	8.437	8.437	11.312	3			11.4639	11.403	0.0608571		11.5	11.854	-0.354		11.187	10.437	10.812	11.385	9.898	8.383		11.5	10.062	8.375	11.388	9.967	8.284		11.5	9.75	8.687	11.382	9.9	8.342		11.625	11.812	11.562	11.53	11.735	11.849
11.455	8.375	0	0	0		8.375	8.437	8.5	11.312	2.937			11.455	11.402	0.053		11.5	11.854	-0.354		11.25	10.437	10.812	11.385	9.898	8.389		11.5	10.062	8.375	11.387	9.966	8.286		11.5	9.75	8.687	11.382	9.9	8.347		11.625	11.812	11.562	11.53	11.734	11.849
11.455	8.312	0	0	0		8.312	8.437	8.437	11.312	3			11.455	11.402	0.053		11.5	11.854	-0.354		11.25	10.437	10.812	11.384	9.898	8.394		11.5	10.062	8.375	11.387	9.966	8.287		11.5	9.75	8.687	11.381	9.9	8.351		11.625	11.812	11.562	11.53	11.734	11.849
11.455	8.375	0	0	0		8.375	8.375	8.437	11	2.625			11.455	11.402	0.053		11.5	11.854	-0.354		11.25	10.437	10.812	11.384	9.898	8.4		11.5	10.062	8.375	11.386	9.966	8.288		11.5	9.75	8.687	11.381	9.9	8.355		11.625	11.812	11.562	11.529	11.734	11.849
11.4639	8.375	0	0	0		8.375	8.375	8.437	11.062	2.687			11.4639	11.401	0.0628571		11.5	11.854	-0.354		11.25	10.437	10.812	11.383	9.898	8.402		11.5	10.062	8.375	11.386	9.965	8.29		11.5	9.75	8.687	11.38	9.9	8.358		11.625	11.812	11.562	11.529	11.734	11.849
11.4639	8.312	0	0	0		8.312	8.312	8.5	11.125	2.813			11.4639	11.401	0.0628571		11.5	11.854	-0.354		11.187	10.437	10.812	11.383	9.897	8.403		11.5	10.062	8.375	11.385	9.965	8.291		11.5	9.75	8.687	11.38	9.9	8.36		11.625	11.812	11.562	11.528	11.733	11.849
11.455	8.25	0	0	0		8.25	8.312	8.5	11.187	2.937			11.455	11.401	0.054		11.5	11.854	-0.354		11.25	10.437	10.812	11.382	9.897	8.404		11.5	10.062	8.375	11.385	9.965	8.293		11.5	9.75	8.687	11.379	9.899	8.362		11.625	11.812	11.562	11.528	11.733	11.849
11.4639	8.312	0	0	0		8.312	8.312	8.437	11.187	2.875			11.4639	11.4	0.0638571		11.5	11.854	-0.354		11.25	10.437	10.812	11.382	9.897	8.404		11.5	10.062	8.375	11.384	9.965	8.294		11.5	9.75	8.687	11.379	9.899	8.364		11.625	11.812	11.562	11.527	11.733	11.849
11.455	8.25	0	0	0		8.25	8.312	8.562	11.25	3			11.455	11.4	0.055		11.5	11.854	-0.354		11.25	10.437	10.812	11.381	9.897	8.405		11.5	10.062	8.375	11.384	9.964	8.296		11.5	9.75	8.687	11.379	9.899	8.366		11.625	11.812	11.562	11.527	11.733	11.849
11.455	8.312	0	0	0		8.312	8.312	8.5	11.25	2.938			11.455	11.399	0.056		11.5	11.854	-0.354		11.25	10.437	10.812	11.381	9.897	8.405		11.5	10.062	8.375	11.383	9.964	8.298		11.5	9.75	8.687	11.378	9.899	8.368		11.625	11.812	11.562	11.527	11.732	11.849
11.4639	8.312	0	0	0		8.312	8.375	8.5	11.25	2.938			11.4639	11.399	0.0648571		11.5	11.854	-0.354		11.25	10.437	10.812	11.38	9.897	8.406		11.5	10.062	8.375	11.383	9.964	8.299		11.5	9.75	8.687	11.378	9.899	8.37		11.625	11.812	11.562	11.526	11.732	11.848
11.455	8.312	0	0	0		8.312	8.312	8.5	11.125	2.813			11.455	11.399	0.056		11.5	11.854	-0.354		11.25	10.437	10.812	11.38	9.897	8.407		11.5	10.062	8.375	11.383	9.963	8.301		11.5	9.75	8.687	11.377	9.899	8.372		11.625	11.812	11.562	11.526	11.732	11.848
11.455	8.25	0	0	0		8.25	8.25	8.437	11.125	2.875			11.455	11.398	0.057		11.5	11.854	-0.354		11.187	10.437	10.812	11.38	9.897	8.407		11.5	10.062	8.375	11.382	9.963	8.302		11.5	9.75	8.687	11.377	9.899	8.374		11.625	11.812	11.562	11.525	11.732	11.848
11.4639	8.187	0	0	0		8.187	8.312	8.437	11.062	2.875			11.4639	11.398	0.0658571		11.5	11.854	-0.354		11.187	10.437	10.75	11.379	9.896	8.408		11.5	10.062	8.375	11.382	9.963	8.304		11.5	9.75	8.687	11.376	9.899	8.376		11.625	11.812	11.562	11.525	11.731	11.848
11.455	8.25	0	0	0		8.25	8.312	8.437	11.062	2.812			11.455	11.398	0.057		11.5	11.854	-0.354		11.187	10.437	10.75	11.379	9.896	8.408		11.5	10.062	8.375	11.381	9.962	8.305		11.5	9.75	8.687	11.376	9.898	8.378		11.625	11.812	11.562	11.525	11.731	11.848
11.455	8.25	0	0	0		8.25	8.312	8.437	11	2.75			11.455	11.397	0.058		11.5	11.854	-0.354		11.25	10.437	10.687	11.378	9.896	8.409		11.5	10.062	8.375	11.381	9.962	8.307		11.5	9.75	8.625	11.375	9.898	8.38		11.625	11.812	11.562	11.524	11.731	11.848
11.455	8.25	0	0	0		8.25	8.312	8.437	11	2.75			11.455	11.397	0.058		11.5	11.854	-0.354		11.25	10.437	10.687	11.378	9.896	8.41		11.5	10.062	8.375	11.38	9.962	8.308		11.5	9.75	8.687	11.375	9.898	8.383		11.625	11.812	11.562	11.524	11.73	11.848
11.455	8.312	0	0	0		8.312	8.375	8.5	10.937	2.625			11.455	11.396	0.059		11.5	11.854	-0.354		11.25	10.437	10.687	11.377	9.896	8.41		11.5	10.062	8.375	11.38	9.961	8.31		11.5	9.75	8.687	11.374	9.898	8.385		11.625	11.812	11.562	11.523	11.73	11.848
11.4639	8.312	0	0	0		8.312	8.375	8.562	10.937	2.625			11.4639	11.396	0.0678571		11.5	11.854	-0.354		11.187	10.437	10.687	11.377	9.896	8.411		11.5	10.062	8.375	11.379	9.961	8.311		11.5	9.75	8.687	11.374	9.898	8.387		11.625	11.812	11.562	11.523	11.73	11.848
11.455	8.375	0	0	0		8.375	8.437	8.562	11	2.625			11.455	11.396	0.059		11.5	11.854	-0.354		11.187	10.437	10.687	11.376	9.896	8.411		11.5	10.062	8.375	11.379	9.961	8.313		11.5	9.75	8.687	11.374	9.898	8.389		11.625	11.812	11.562	11.523	11.73	11.848
11.455	8.437	0	0	0		8.437	8.437	8.625	11	2.563			11.455	11.395	0.06		11.5	11.854	-0.354		11.187	10.5	10.687	11.376	9.896	8.411		11.5	10.062	8.375	11.378	9.961	8.314		11.5	9.75	8.687	11.373	9.898	8.39		11.625	11.812	11.562	11.522	11.729	11.848
11.455	8.437	0	0	0		8.437	8.437	8.625	11.062	2.625			11.455	11.395	0.06		11.5	11.854	-0.354		11.25	10.437	10.687	11.375	9.895	8.405		11.5	10.062	8.375	11.378	9.96	8.315		11.5	9.75	8.687	11.373	9.897	8.388		11.625	11.812	11.562	11.522	11.729	11.848
11.4461	8.437	0	0	0		8.437	8.437	8.437	10.375	1.938			11.4461	11.394	0.0521429		11.5	11.853	-0.353		11.25	10.437	10.687	11.375	9.895	8.4		11.5	10.062	8.375	11.378	9.96	8.316		11.5	9.75	8.687	11.372	9.897	8.385		11.625	11.812	11.562	11.521	11.729	11.848
11.455	8.375	0	0	0		8.375	8.437	8.375	10.187	1.812			11.455	11.394	0.061		11.5	11.853	-0.353		11.25	10.5	10.687	11.375	9.895	8.395		11.5	10.062	8.375	11.377	9.96	8.317		11.5	9.75	8.687	11.372	9.897	8.383		11.625	11.812	11.562	11.521	11.729	11.847
11.455	8.312	0	0	0		8.312	8.375	8.437	10.375	2.063			11.455	11.393	0.062		11.5	11.853	-0.353		11.25	10.5	10.687	11.374	9.895	8.39		11.5	10.062	8.375	11.377	9.959	8.319		11.5	9.75	8.687	11.371	9.897	8.381		11.625	11.812	11.562	11.521	11.728	11.847
11.455	8.312	0	0	0		8.312	8.312	8.437	10.5	2.188			11.455	11.393	0.062		11.5	11.853	-0.353		11.25	10.437	10.625	11.374	9.895	8.385		11.5	10.062	8.375	11.376	9.959	8.32		11.5	9.75	8.687	11.371	9.897	8.379		11.625	11.812	11.562	11.52	11.728	11.847
11.4639	8.312	0	0	0		8.312	8.25	8.437	10.562	2.312			11.4639	11.392	0.0718571		11.5	11.853	-0.353		11.25	10.5	10.625	11.373	9.895	8.38		11.5	10.062	8.375	11.376	9.959	8.321		11.5	9.75	8.625	11.37	9.897	8.377		11.625	11.812	11.562	11.52	11.728	11.847
11.4639	8.312	0	0	0		8.312	8.25	8.437	10.437	2.187			11.4639	11.392	0.0718571		11.5	11.853	-0.353		11.187	10.5	10.562	11.373	9.895	8.375		11.5	10.062	8.375	11.375	9.959	8.322		11.5	9.75	8.625	11.37	9.897	8.375		11.625	11.812	11.562	11.519	11.728	11.847
11.455	8.25	0	0	0		8.25	8.25	8.312	9.812	1.562			11.455	11.392	0.063		11.5	11.853	-0.353		11.25	10.5	10.5	11.372	9.895	8.369		11.5	10.062	8.375	11.375	9.958	8.323		11.5	9.75	8.625	11.37	9.897	8.373		11.625	11.812	11.562	11.519	11.727	11.847
11.455	8.312	0	0	0		8.312	8.25	8.312	9.937	1.687			11.455	11.391	0.064		11.5	11.853	-0.353		11.25	10.5	10.5	11.372	9.895	8.364		11.5	10.062	8.375	11.374	9.958	8.324		11.5	9.75	8.625	11.369	9.896	8.371		11.625	11.812	11.562	11.519	11.727	11.847
11.4639	8.312	0	0	0		8.312	8.25	8.375	10.062	1.812			11.4639	11.391	0.0728571		11.5	11.853	-0.353		11.187	10.5	10.437	11.371	9.894	8.359		11.5	10.062	8.375	11.374	9.958	8.325		11.5	9.75	8.625	11.369	9.896	8.369		11.625	11.812	11.562	11.518	11.727	11.847
11.4639	8.25	0	0	0		8.25	8.187	8.312	10.062	1.875			11.4639	11.39	0.0738571		11.5	11.853	-0.353		11.187	10.5	10.375	11.371	9.894	8.354		11.5	10.062	8.437	11.373	9.957	8.326		11.5	9.75	8.562	11.368	9.896	8.366		11.625	11.812	11.562	11.518	11.727	11.847
11.4461	8.125	0	0	0		8.125	8.187	8.312	10	1.875			11.4461	11.39	0.0561429		11.5	11.853	-0.353		11.187	10.5	10.312	11.37	9.894	8.349		11.5	10.062	8.437	11.373	9.957	8.327		11.5	9.75	8.562	11.368	9.896	8.364		11.625	11.812	11.562	11.517	11.726	11.847
11.455	8.187	0	0	0		8.187	8.187	8.375	9.875	1.688			11.455	11.389	0.066		11.5	11.853	-0.353		11.187	10.5	10.25	11.37	9.894	8.344		11.5	10.062	8.375	11.373	9.957	8.329		11.5	9.75	8.562	11.367	9.896	8.362		11.625	11.812	11.562	11.517	11.726	11.847
11.455	8.187	0	0	0		8.187	8.25	8.375	9.562	1.375			11.455	11.389	0.066		11.5	11.853	-0.353		11.25	10.5	10.187	11.37	9.894	8.339		11.5	10.062	8.375	11.372	9.957	8.33		11.5	9.75	8.562	11.367	9.896	8.36		11.625	11.812	11.562	11.517	11.726	11.847
11.4639	8.25	0	0	0		8.25	8.25	8.375	9.625	1.375			11.4639	11.388	0.0758571		11.5	11.853	-0.353		11.187	10.5	10.125	11.369	9.894	8.333		11.5	10.062	8.375	11.372	9.956	8.331		11.5	9.75	8.562	11.366	9.896	8.358		11.625	11.812	11.562	11.516	11.726	11.847
11.455	8.25	0	0	0		8.25	8.25	8.375	9.75	1.5			11.455	11.388	0.067		11.5	11.853	-0.353		11.25	10.5	10.125	11.369	9.894	8.328		11.5	10.062	8.437	11.371	9.956	8.332		11.5	9.75	8.562	11.366	9.896	8.356		11.625	11.812	11.562	11.516	11.725	11.847
11.4461	8.25	0	0	0		8.25	8.187	8.312	9.562	1.375			11.4461	11.387	0.0591429		11.5	11.853	-0.353		11.187	10.5	10.062	11.368	9.894	8.318		11.5	10.062	8.437	11.371	9.956	8.332		11.5	9.75	8.562	11.365	9.895	8.349		11.625	11.812	11.562	11.515	11.725	11.846
11.4639	8.187	0	0	0		8.187	8.187	8.25	9.562	1.375			11.4639	11.387	0.0768571		11.5	11.853	-0.353		11.25	10.5	10.062	11.368	9.894	8.307		11.5	10.062	8.375	11.37	9.955	8.332		11.5	9.75	8.562	11.365	9.895	8.342		11.625	11.812	11.562	11.515	11.725	11.846
11.4639	8.125	0	0	0		8.125	8.062	8.25	9.75	1.688			11.4639	11.386	0.0778571		11.5	11.853	-0.353		11.25	10.5	10	11.367	9.893	8.296		11.5	10.062	8.437	11.37	9.955	8.332		11.5	9.75	8.562	11.365	9.895	8.335		11.625	11.812	11.562	11.515	11.724	11.846
11.455	8.125	0	0	0		8.125	8	8.187	9.687	1.687			11.455	11.386	0.069		11.5	11.853	-0.353		11.187	10.5	10	11.367	9.893	8.285		11.5	10.062	8.437	11.369	9.955	8.332		11.5	9.75	8.5	11.364	9.895	8.328		11.625	11.812	11.562	11.514	11.724	11.846
11.455	8	0	0	0		8	8	8.187	9.75	1.75			11.455	11.385	0.07		11.5	11.853	-0.353		11.187	10.5	10	11.366	9.893	8.274		11.5	10.062	8.437	11.369	9.955	8.332		11.5	9.75	8.5	11.364	9.895	8.321		11.625	11.812	11.562	11.514	11.724	11.846
11.455	8	0	0	0		8	8	8.25	9.875	1.875			11.455	11.385	0.07		11.5	11.852	-0.352		11.25	10.5	9.937	11.366	9.893	8.263		11.5	10.062	8.437	11.369	9.954	8.332		11.5	9.75	8.5	11.363	9.895	8.313		11.625	11.812	11.562	11.513	11.724	11.846
11.4639	8	0	0	0		8	8	8.187	9.625	1.625			11.4639	11.384	0.0798571		11.5	11.852	-0.352		11.25	10.5	9.937	11.365	9.893	8.252		11.5	10.062	8.437	11.368	9.954	8.332		11.5	9.75	8.5	11.363	9.895	8.306		11.625	11.812	11.562	11.513	11.723	11.846
11.4461	8.062	0	0	0		8.062	8	8.125	9.312	1.312			11.4461	11.383	0.0631429		11.5	11.852	-0.352		11.187	10.5	9.875	11.365	9.893	8.241		11.437	10.062	8.437	11.368	9.954	8.332		11.5	9.75	8.5	11.362	9.895	8.299		11.625	11.812	11.562	11.513	11.723	11.846
11.455	8.125	0	0	0		8.125	8.125	8.187	9.375	1.25			11.455	11.383	0.072		11.5	11.852	-0.352		11.187	10.5	9.875	11.364	9.893	8.23		11.5	10.062	8.437	11.367	9.954	8.332		11.5	9.75	8.5	11.362	9.895	8.292		11.625	11.812	11.562	11.512	11.723	11.846
11.455	8.125	0	0	0		8.125	8.125	8.062	9.625	1.563			11.455	11.382	0.073		11.5	11.852	-0.352		11.25	10.5	9.875	11.364	9.893	8.219		11.5	10.062	8.437	11.367	9.953	8.332		11.5	9.75	8.437	11.361	9.894	8.285		11.625	11.812	11.562	11.512	11.723	11.846
11.455	8.062	0	0	0		8.062	8.062	8.062	9.812	1.75			11.455	11.382	0.073		11.5	11.852	-0.352		11.187	10.5	9.812	11.364	9.893	8.208		11.5	10.062	8.437	11.366	9.953	8.332		11.5	9.75	8.437	11.361	9.894	8.278		11.625	11.812	11.562	11.511	11.722	11.846
11.4461	8.062	0	0	0		8.062	8	8.062	9.812	1.812			11.4461	11.381	0.0651429		11.5	11.852	-0.352		11.25	10.5	9.875	11.363	9.893	8.197		11.5	10.062	8.437	11.366	9.953	8.332		11.5	9.75	8.437	11.36	9.894	8.271		11.625	11.812	11.562	11.511	11.722	11.846
11.4461	8	0	0	0		8	8	8.062	9.937	1.937			11.4461	11.381	0.0651429		11.5	11.852	-0.352		11.187	10.5	9.875	11.363	9.892	8.186		11.5	10.062	8.437	11.365	9.953	8.332		11.5	9.75	8.375	11.36	9.894	8.263		11.625	11.812	11.562	11.511	11.722	11.846
11.455	8.062	0	0	0		8.062	8.062	8.062	10	1.938			11.455	11.38	0.075		11.5	11.852	-0.352		11.187	10.5	9.875	11.362	9.892	8.175		11.5	10.062	8.437	11.365	9.952	8.332		11.5	9.75	8.375	11.36	9.894	8.256		11.625	11.812	11.562	11.51	11.722	11.845
11.455	8.062	0	0	0		8.062	8.125	8.125	10	1.938			11.455	11.38	0.075		11.5	11.852	-0.352		11.187	10.5	9.875	11.362	9.892	8.164		11.5	10.062	8.437	11.364	9.952	8.332		11.5	9.75	8.375	11.359	9.894	8.249		11.625	11.812	11.562	11.51	11.721	11.845
11.455	8.125	0	0	0		8.125	8.187	8.125	10	1.875			11.455	11.379	0.076		11.5	11.851	-0.351		11.187	10.5	9.875	11.361	9.892	8.153		11.5	10.062	8.437	11.364	9.952	8.332		11.5	9.75	8.375	11.359	9.894	8.242		11.625	11.812	11.562	11.509	11.721	11.845
11.455	8.125	0	0	0		8.125	8.187	8.125	10	1.875			11.455	11.379	0.076		11.5	11.851	-0.351		11.187	10.5	9.875	11.361	9.892	8.147		11.5	10.062	8.437	11.364	9.951	8.332		11.5	9.75	8.375	11.358	9.894	8.237		11.625	11.812	11.562	11.509	11.721	11.845
11.455	8.25	0	0	0		8.25	8.312	8.25	10.062	1.812			11.455	11.378	0.077		11.5	11.851	-0.351		11.187	10.5	9.875	11.36	9.892	8.146		11.5	10.062	8.437	11.363	9.951	8.331		11.5	9.75	8.375	11.358	9.894	8.233		11.625	11.812	11.562	11.509	11.721	11.845
11.455	8.312	0	0	0		8.312	8.312	8.312	10	1.688			11.455	11.378	0.077		11.5	11.851	-0.351		11.187	10.5	9.875	11.36	9.892	8.145		11.5	10.062	8.437	11.363	9.951	8.33		11.5	9.75	8.375	11.357	9.893	8.23		11.625	11.812	11.562	11.508	11.72	11.845
11.4639	8.312	0	0	0		8.312	8.312	8.312	9.937	1.625			11.4639	11.377	0.0868571		11.5	11.851	-0.351		11.187	10.5	9.875	11.36	9.892	8.144		11.5	10.062	8.437	11.362	9.951	8.33		11.5	9.75	8.437	11.357	9.893	8.226		11.625	11.812	11.562	11.508	11.72	11.845
11.455	8.312	0	0	0		8.312	8.312	8.375	10.062	1.75			11.455	11.377	0.078		11.5	11.851	-0.351		11.187	10.5	9.875	11.359	9.892	8.143		11.5	10.062	8.437	11.362	9.95	8.329		11.5	9.75	8.437	11.356	9.893	8.223		11.625	11.812	11.562	11.507	11.72	11.845
11.4461	8.25	0	0	0		8.25	8.25	8.375	10.125	1.875			11.4461	11.376	0.0701429		11.5	11.851	-0.351		11.187	10.5	9.875	11.359	9.891	8.142		11.5	10.062	8.437	11.361	9.95	8.328		11.5	9.75	8.437	11.356	9.893	8.219		11.625	11.812	11.562	11.507	11.72	11.845
11.4639	8.25	0	0	0		8.25	8.25	8.375	9.812	1.562			11.4639	11.376	0.0878571		11.5	11.851	-0.351		11.187	10.5	9.875	11.358	9.891	8.14		11.5	10.062	8.437	11.361	9.95	8.328		11.5	9.75	8.437	11.356	9.893	8.216		11.625	11.812	11.562	11.506	11.719	11.845
11.455	8.312	0	0	0		8.312	8.312	8.312	9.5	1.188			11.455	11.375	0.08		11.5	11.851	-0.351		11.187	10.5	9.875	11.358	9.891	8.139		11.5	10.062	8.437	11.36	9.95	8.327		11.5	9.75	8.437	11.355	9.893	8.212		11.625	11.812	11.562	11.506	11.719	11.845
11.4461	8.25	0	0	0		8.25	8.312	8.312	9.25	1			11.4461	11.375	0.0711429		11.5	11.851	-0.351		11.25	10.5	9.875	11.357	9.891	8.138		11.5	10.062	8.437	11.36	9.95	8.326		11.5	9.75	8.437	11.355	9.893	8.209		11.625	11.812	11.562	11.506	11.719	11.845
11.4461	8.187	0	0	0		8.187	8.187	8.187	9.062	0.875			11.4461	11.374	0.0721429		11.5	11.851	-0.351		11.187	10.5	9.812	11.357	9.891	8.137		11.5	10.062	8.437	11.359	9.949	8.326		11.5	9.75	8.437	11.354	9.893	8.206		11.625	11.812	11.562	11.505	11.718	11.845
11.4461	8.187	0	0	0		8.187	8.125	8.187	9.062	0.937			11.4461	11.374	0.0721429		11.5	11.851	-0.351		11.25	10.5	9.812	11.356	9.891	8.136		11.5	10.062	8.437	11.359	9.949	8.325		11.437	9.75	8.375	11.354	9.893	8.202		11.625	11.812	11.562	11.505	11.718	11.845
11.4461	8.187	0	0	0		8.187	8.125	8.187	9	0.875			11.4461	11.374	0.0721429		11.5	11.851	-0.351		11.187	10.562	9.75	11.356	9.891	8.135		11.5	10.062	8.437	11.359	9.949	8.324		11.5	9.75	8.375	11.353	9.892	8.199		11.625	11.812	11.562	11.504	11.718	11.844
11.455	8.187	0	0	0		8.187	8.062	8.187	8.937	0.875			11.455	11.373	0.082		11.5	11.85	-0.35		11.25	10.562	9.687	11.355	9.891	8.134		11.5	10.062	8.437	11.358	9.949	8.324		11.5	9.75	8.375	11.353	9.892	8.195		11.625	11.812	11.562	11.504	11.718	11.844
11.455	8.187	0	0	0		8.187	8.062	8.125	8.875	0.813			11.455	11.373	0.082		11.5	11.85	-0.35		11.187	10.5	9.625	11.355	9.891	8.133		11.5	10.062	8.437	11.358	9.948	8.323		11.5	9.75	8.375	11.352	9.892	8.192		11.625	11.812	11.562	11.504	11.717	11.844
11.455	8.125	0	0	0		8.125	8	8.125	8.812	0.812			11.455	11.372	0.083		11.5	11.85	-0.35		11.187	10.5	9.562	11.355	9.891	8.132		11.5	10.062	8.437	11.357	9.948	8.322		11.5	9.75	8.312	11.352	9.892	8.188		11.625	11.812	11.562	11.503	11.717	11.844
11.4461	8.125	0	0	0		8.125	7.937	8	8.875	0.938			11.4461	11.372	0.0741429		11.5	11.85	-0.35		11.187	10.562	9.562	11.354	9.89	8.131		11.5	10.062	8.437	11.357	9.948	8.322		11.5	9.75	8.312	11.352	9.892	8.185		11.625	11.812	11.562	11.503	11.717	11.844
11.4639	8.125	0	0	0		8.125	7.937	8.062	9	1.063			11.4639	11.371	0.0928571		11.5	11.85	-0.35		11.187	10.5	9.5	11.354	9.89	8.13		11.5	10.062	8.437	11.356	9.948	8.321		11.5	9.75	8.312	11.351	9.892	8.182		11.625	11.812	11.562	11.502	11.717	11.844
11.455	8.125	0	0	0		8.125	8	8.062	9	1			11.455	11.371	0.084		11.5	11.85	-0.35		11.25	10.562	9.437	11.353	9.89	8.129		11.5	10.062	8.437	11.356	9.947	8.32		11.5	9.75	8.312	11.351	9.892	8.18		11.625	11.812	11.562	11.502	11.716	11.844
11.455	8.125	0	0	0		8.125	8	8.062	8.812	0.812			11.455	11.37	0.085		11.5	11.85	-0.35		11.187	10.562	9.437	11.353	9.89	8.129		11.5	10.062	8.437	11.355	9.947	8.319		11.5	9.75	8.312	11.35	9.892	8.178		11.625	11.812	11.562	11.502	11.716	11.844
11.446	8.125	0	0	0		8.125	7.937	8.062	8.937	1			11.446	11.37	0.076		11.5	11.85	-0.35		11.187	10.562	9.375	11.352	9.89	8.129		11.5	10.062	8.437	11.355	9.947	8.318		11.5	9.75	8.312	11.35	9.892	8.177		11.625	11.812	11.562	11.501	11.716	11.844
11.455	8	0	0	0		8	7.937	8.125	9.062	1.125			11.455	11.37	0.085		11.5	11.85	-0.35		11.25	10.562	9.375	11.352	9.89	8.129		11.5	10.062	8.437	11.355	9.947	8.317		11.5	9.75	8.25	11.349	9.891	8.175		11.625	11.812	11.562	11.501	11.716	11.844
11.455	8	0	0	0		8	8	8.125	9.125	1.125			11.455	11.369	0.086		11.5	11.85	-0.35		11.187	10.562	9.375	11.351	9.89	8.129		11.5	10.062	8.437	11.354	9.946	8.316		11.5	9.75	8.25	11.349	9.891	8.173		11.625	11.812	11.562	11.5	11.715	11.844
11.455	8.062	0	0	0		8.062	8	8.125	9.187	1.187			11.455	11.369	0.086		11.5	11.85	-0.35		11.187	10.562	9.312	11.351	9.89	8.129		11.5	10.062	8.437	11.354	9.946	8.316		11.5	9.75	8.25	11.348	9.891	8.172		11.625	11.812	11.562	11.5	11.715	11.844
11.455	8.125	0	0	0		8.125	8.062	8.125	9.125	1.063			11.455	11.368	0.087		11.5	11.85	-0.35		11.187	10.562	9.312	11.35	9.89	8.128		11.5	10.062	8.437	11.353	9.946	8.315		11.5	9.75	8.25	11.348	9.891	8.17		11.625	11.812	11.562	11.5	11.715	11.844
11.455	8.125	0	0	0		8.125	8.062	8.125	9.062	1			11.455	11.368	0.087		11.5	11.849	-0.349		11.187	10.562	9.25	11.35	9.89	8.128		11.5	10.062	8.437	11.353	9.946	8.314		11.437	9.75	8.25	11.347	9.891	8.169		11.625	11.812	11.562	11.499	11.715	11.843
11.4461	8.125	0	0	0		8.125	8	8.125	9.062	1.062			11.4461	11.367	0.0791429		11.5	11.849	-0.349		11.25	10.562	9.25	11.35	9.889	8.128		11.5	10.062	8.437	11.352	9.946	8.313		11.437	9.75	8.25	11.347	9.891	8.167		11.625	11.812	11.562	11.499	11.714	11.843
11.455	8.125	0	0	0		8.125	7.937	8.062	8.812	0.875			11.455	11.367	0.088		11.5	11.849	-0.349		11.187	10.562	9.25	11.349	9.889	8.128		11.5	10.062	8.437	11.352	9.945	8.312		11.5	9.75	8.25	11.347	9.891	8.165		11.625	11.812	11.562	11.498	11.714	11.843
11.455	8.062	0	0	0		8.062	7.937	8	8.625	0.688			11.455	11.367	0.088		11.5	11.849	-0.349		11.187	10.562	9.187	11.349	9.889	8.128		11.5	10.062	8.437	11.351	9.945	8.311		11.5	9.75	8.25	11.346	9.891	8.164		11.625	11.812	11.562	11.498	11.714	11.843
11.455	8.125	0	0	0		8.125	7.937	8	8.75	0.813			11.455	11.366	0.089		11.5	11.849	-0.349		11.25	10.562	9.187	11.348	9.889	8.128		11.5	10.062	8.437	11.351	9.945	8.31		11.5	9.75	8.187	11.346	9.891	8.162		11.625	11.812	11.562	11.498	11.714	11.843
11.4461	8.125	0	0	0		8.125	7.937	8.062	8.75	0.813			11.4461	11.366	0.0801429		11.5	11.849	-0.349		11.187	10.562	9.125	11.348	9.889	8.127		11.437	10.062	8.437	11.35	9.945	8.309		11.5	9.75	8.187	11.345	9.89	8.16		11.625	11.812	11.562	11.497	11.713	11.843
11.455	8.062	0	0	0		8.062	7.937	8.062	8.937	1			11.455	11.365	0.09		11.5	11.849	-0.349		11.25	10.562	9.125	11.347	9.889	8.127		11.5	10.062	8.437	11.35	9.944	8.308		11.437	9.75	8.187	11.345	9.89	8.159		11.625	11.812	11.562	11.497	11.713	11.843
11.4461	8.062	0	0	0		8.062	7.875	8.062	8.937	1.062			11.4461	11.365	0.0811429		11.5	11.849	-0.349		11.25	10.562	9.062	11.347	9.889	8.126		11.5	10.062	8.437	11.35	9.944	8.308		11.5	9.75	8.187	11.344	9.89	8.157		11.625	11.812	11.562	11.496	11.713	11.843
11.4639	8.062	0	0	0		8.062	7.875	8.062	9	1.125			11.4639	11.364	0.0998571		11.5	11.849	-0.349		11.187	10.562	9.062	11.346	9.889	8.122		11.5	10.062	8.437	11.349	9.944	8.306		11.437	9.75	8.187	11.344	9.89	8.154		11.625	11.812	11.562	11.496	11.713	11.843
11.4371	8.062	0	0	0		8.062	7.812	8	8.812	1			11.4371	11.364	0.0731429		11.5	11.849	-0.349		11.187	10.562	9.062	11.346	9.889	8.118		11.5	10.062	8.437	11.349	9.944	8.305		11.5	9.75	8.187	11.343	9.89	8.151		11.625	11.812	11.562	11.495	11.712	11.843
11.455	8.062	0	0	0		8.062	7.812	7.937	8.812	1			11.455	11.363	0.092		11.5	11.849	-0.349		11.187	10.562	9	11.345	9.888	8.115		11.437	10.062	8.437	11.348	9.944	8.304		11.437	9.75	8.187	11.343	9.89	8.148		11.625	11.812	11.562	11.495	11.712	11.843
11.455	8	0	0	0		8	7.812	7.937	8.937	1.125			11.455	11.363	0.092		11.5	11.848	-0.348		11.187	10.562	9	11.345	9.888	8.111		11.437	10.062	8.437	11.348	9.943	8.303		11.5	9.75	8.125	11.342	9.89	8.145		11.625	11.812	11.562	11.495	11.712	11.843
11.455	8	0	0	0		8	7.812	7.937	8.937	1.125			11.455	11.362	0.093		11.5	11.848	-0.348		11.25	10.562	9	11.345	9.888	8.107		11.437	10.062	8.437	11.347	9.943	8.302		11.437	9.75	8.187	11.342	9.89	8.142		11.625	11.812	11.562	11.494	11.712	11.843
11.455	8.062	0	0	0		8.062	7.75	7.937	9	1.25			11.455	11.362	0.093		11.5	11.848	-0.348		11.187	10.562	8.937	11.344	9.888	8.104		11.5	10.062	8.437	11.347	9.943	8.301		11.437	9.75	8.125	11.342	9.89	8.14		11.625	11.812	11.562	11.494	11.711	11.842
11.455	8.062	0	0	0		8.062	7.75	7.937	9	1.25			11.455	11.362	0.093		11.5	11.848	-0.348		11.187	10.562	8.937	11.344	9.888	8.1		11.5	10.062	8.437	11.346	9.943	8.3		11.5	9.75	8.125	11.341	9.889	8.137		11.625	11.812	11.562	11.493	11.711	11.842
11.455	8	0	0	0		8	7.75	7.937	9	1.25			11.455	11.361	0.094		11.5	11.848	-0.348		11.187	10.562	8.937	11.343	9.888	8.096		11.437	10.062	8.437	11.346	9.942	8.299		11.437	9.75	8.125	11.341	9.889	8.134		11.625	11.812	11.562	11.493	11.711	11.842
11.4639	7.937	0	0	0		7.937	7.75	7.937	9	1.25			11.4639	11.361	0.102857		11.5	11.848	-0.348		11.187	10.562	8.875	11.343	9.888	8.092		11.437	10.062	8.437	11.345	9.942	8.298		11.437	9.75	8.125	11.34	9.889	8.131		11.625	11.812	11.562	11.493	11.711	11.842
11.4371	7.875	0	0	0		7.875	7.75	7.937	9	1.25			11.4371	11.36	0.0771429		11.5	11.848	-0.348		11.187	10.562	8.875	11.342	9.888	8.089		11.5	10.062	8.437	11.345	9.942	8.297		11.437	9.75	8.125	11.34	9.889	8.128		11.625	11.812	11.562	11.492	11.71	11.842
11.4461	7.875	0	0	0		7.875	7.75	8	9	1.25			11.4461	11.36	0.0861429		11.5	11.848	-0.348		11.187	10.562	8.875	11.342	9.888	8.085		11.5	10.062	8.437	11.345	9.942	8.295		11.437	9.75	8.125	11.339	9.889	8.125		11.625	11.812	11.562	11.492	11.71	11.842
11.4461	7.937	0	0	0		7.937	7.75	7.937	8.937	1.187			11.4461	11.359	0.0871429		11.5	11.848	-0.348		11.25	10.562	8.875	11.341	9.887	8.081		11.5	10.062	8.437	11.344	9.942	8.294		11.437	9.75	8.125	11.339	9.889	8.123		11.625	11.812	11.562	11.491	11.71	11.842
11.455	8	0	0	0		8	7.812	8	8.75	0.938			11.455	11.359	0.096		11.5	11.848	-0.348		11.187	10.562	8.875	11.341	9.887	8.078		11.5	10.062	8.437	11.344	9.941	8.293		11.437	9.75	8.125	11.338	9.889	8.12		11.625	11.812	11.562	11.491	11.71	11.842
11.4371	8	0	0	0		8	7.875	8	8.687	0.812			11.4371	11.358	0.0791429		11.5	11.847	-0.347		11.187	10.562	8.812	11.34	9.887	8.074		11.5	10.062	8.437	11.343	9.941	8.292		11.437	9.75	8.062	11.338	9.889	8.117		11.625	11.812	11.562	11.491	11.709	11.842
11.455	8.062	0	0	0		8.062	7.875	8	8.75	0.875			11.455	11.358	0.097		11.5	11.847	-0.347		11.187	10.562	8.812	11.34	9.887	8.075		11.5	10.062	8.437	11.343	9.941	8.291		11.5	9.75	8.062	11.338	9.889	8.116		11.625	11.812	11.562	11.49	11.709	11.842
11.4461	8.062	0	0	0		8.062	7.875	8	8.75	0.875			11.4461	11.357	0.0891429		11.5	11.847	-0.347		11.187	10.562	8.75	11.34	9.887	8.078		11.5	10.062	8.437	11.342	9.941	8.29		11.437	9.75	8.062	11.337	9.888	8.117		11.625	11.812	11.562	11.49	11.709	11.842
11.4461	8.062	0	0	0		8.062	7.875	8	8.75	0.875			11.4461	11.357	0.0891429		11.5	11.847	-0.347		11.187	10.562	8.75	11.339	9.887	8.081		11.5	10.062	8.437	11.342	9.94	8.289		11.437	9.75	8.062	11.337	9.888	8.117		11.625	11.812	11.562	11.489	11.709	11.842
11.4461	8.125	0	0	0		8.125	7.875	8.062	8.812	0.937			11.4461	11.357	0.0891429		11.5	11.847	-0.347		11.187	10.562	8.75	11.339	9.887	8.084		11.5	10.062	8.437	11.341	9.94	8.288		11.437	9.75	8.062	11.336	9.888	8.118		11.625	11.812	11.562	11.489	11.708	11.841
11.4461	8.125	0	0	0		8.125	7.875	8	8.812	0.937			11.4461	11.356	0.0901429		11.5	11.847	-0.347		11.187	10.562	8.75	11.338	9.887	8.087		11.5	10.062	8.437	11.341	9.94	8.287		11.437	9.75	8.062	11.336	9.888	8.119		11.625	11.812	11.562	11.489	11.708	11.841
11.4461	8.125	0	0	0		8.125	7.875	8	8.75	0.875			11.4461	11.356	0.0901429		11.5	11.847	-0.347		11.187	10.562	8.75	11.338	9.886	8.091		11.5	10.062	8.437	11.34	9.94	8.286		11.437	9.75	8.062	11.335	9.888	8.119		11.625	11.812	11.562	11.488	11.708	11.841
11.455	8.125	0	0	0		8.125	7.875	8.062	8.75	0.875			11.455	11.356	0.099		11.5	11.847	-0.347		11.187	10.562	8.687	11.337	9.886	8.094		11.5	10.062	8.437	11.34	9.94	8.285		11.437	9.75	8.062	11.335	9.888	8.12		11.625	11.812	11.562	11.488	11.708	11.841
11.455	8.125	0	0	0		8.125	7.875	8.062	8.75	0.875			11.455	11.355	0.1		11.5	11.847	-0.347		11.187	10.562	8.687	11.337	9.886	8.097		11.5	10.062	8.437	11.34	9.939	8.285		11.5	9.75	8.062	11.334	9.888	8.12		11.625	11.812	11.562	11.487	11.707	11.841
11.4461	8.125	0	0	0		8.125	7.812	8	8.687	0.875			11.4461	11.355	0.0911429		11.5	11.847	-0.347		11.187	10.562	8.687	11.336	9.886	8.1		11.5	10.062	8.437	11.339	9.939	8.284		11.437	9.75	8.062	11.334	9.888	8.121		11.625	11.812	11.562	11.487	11.707	11.841
11.4371	8.125	0	0	0		8.125	7.875	8	8.562	0.687			11.4371	11.354	0.0831429		11.5	11.847	-0.347		11.187	10.562	8.687	11.336	9.886	8.103		11.5	10.062	8.437	11.339	9.939	8.283		11.437	9.75	8.062	11.334	9.887	8.121		11.625	11.812	11.562	11.486	11.707	11.841
11.4461	8.125	0	0	0		8.125	7.875	7.937	8.562	0.687			11.4461	11.354	0.0921429		11.5	11.847	-0.347		11.187	10.562	8.687	11.336	9.886	8.106		11.5	10.062	8.437	11.338	9.939	8.282		11.437	9.75	8.062	11.333	9.887	8.122		11.625	11.812	11.562	11.486	11.707	11.841
11.4461	8.062	0	0	0		8.062	7.875	7.937	8.5	0.625			11.4461	11.354	0.0921429		11.5	11.846	-0.346		11.187	10.562	8.625	11.335	9.886	8.11		11.5	10.062	8.375	11.338	9.939	8.281		11.5	9.75	8.062	11.333	9.887	8.123		11.625	11.812	11.562	11.486	11.706	11.841
11.4461	8.062	0	0	0		8.062	7.875	7.937	8.5	0.625			11.4461	11.353	0.0931429		11.5	11.846	-0.346		11.187	10.562	8.625	11.335	9.886	8.113		11.437	10.062	8.437	11.337	9.938	8.28		11.437	9.75	8.062	11.332	9.887	8.123		11.625	11.812	11.562	11.485	11.706	11.841
11.4461	8.062	0	0	0		8.062	7.875	7.937	8.5	0.625			11.4461	11.353	0.0931429		11.5	11.846	-0.346		11.187	10.562	8.625	11.334	9.885	8.116		11.5	10.062	8.437	11.337	9.938	8.279		11.437	9.75	8	11.332	9.887	8.124		11.625	11.812	11.562	11.485	11.706	11.841
11.4461	8.062	0	0	0		8.062	7.875	7.937	8.5	0.625			11.4461	11.353	0.0931429		11.5	11.846	-0.346		11.187	10.562	8.625	11.334	9.885	8.119		11.5	10.062	8.375	11.336	9.938	8.278		11.437	9.75	8	11.331	9.887	8.124		11.625	11.812	11.562	11.484	11.705	11.841
11.4461	8.062	0	0	0		8.062	7.875	7.937	8.375	0.5			11.4461	11.352	0.0941429		11.5	11.846	-0.346		11.187	10.562	8.562	11.333	9.885	8.115		11.5	10.062	8.437	11.336	9.938	8.277		11.437	9.75	8	11.331	9.887	8.122		11.625	11.812	11.562	11.484	11.705	11.841
11.4461	8.062	0	0	0		8.062	7.875	7.937	8.375	0.5			11.4461	11.352	0.0941429		11.5	11.846	-0.346		11.187	10.562	8.562	11.333	9.885	8.109		11.5	10.062	8.437	11.335	9.938	8.276		11.437	9.75	8	11.33	9.887	8.119		11.625	11.812	11.562	11.484	11.705	11.84
11.4461	8.062	0	0	0		8.062	7.937	8	8.312	0.375			11.4461	11.351	0.0951429		11.5	11.846	-0.346		11.187	10.562	8.562	11.332	9.885	8.104		11.5	10.062	8.375	11.335	9.937	8.275		11.437	9.75	8	11.33	9.886	8.116		11.625	11.812	11.562	11.483	11.705	11.84
11.4371	8.062	0	0	0		8.062	7.937	8	8.312	0.375			11.4371	11.351	0.0861429		11.5	11.846	-0.346		11.187	10.562	8.5	11.332	9.885	8.098		11.437	10.062	8.375	11.335	9.937	8.274		11.5	9.75	8	11.329	9.886	8.113		11.625	11.812	11.562	11.483	11.704	11.84
11.4371	8.062	0	0	0		8.062	7.875	8	8.25	0.375			11.4371	11.35	0.0871429		11.5	11.846	-0.346		11.187	10.562	8.5	11.331	9.885	8.093		11.5	10.062	8.375	11.334	9.937	8.273		11.5	9.75	8	11.329	9.886	8.11		11.625	11.812	11.562	11.482	11.704	11.84
11.4461	8.062	0	0	0		8.062	7.875	7.937	8.25	0.375			11.4461	11.35	0.0961429		11.5	11.846	-0.346		11.187	10.562	8.5	11.331	9.884	8.088		11.5	10.062	8.375	11.334	9.937	8.271		11.437	9.75	8	11.329	9.886	8.107		11.625	11.812	11.562	11.482	11.704	11.84
11.4371	8.062	0	0	0		8.062	7.875	7.937	8.25	0.375			11.4371	11.349	0.0881429		11.5	11.845	-0.345		11.187	10.562	8.5	11.331	9.884	8.082		11.437	10.062	8.375	11.333	9.937	8.27		11.5	9.75	7.937	11.328	9.886	8.105		11.625	11.812	11.562	11.482	11.704	11.84
11.4461	8.062	0	0	0		8.062	7.875	7.937	8.25	0.375			11.4461	11.349	0.0971429		11.5	11.845	-0.345		11.187	10.562	8.437	11.33	9.884	8.077		11.5	10.062	8.375	11.333	9.936	8.269		11.437	9.75	8	11.328	9.886	8.102		11.625	11.812	11.562	11.481	11.703	11.84
11.4461	8.062	0	0	0		8.062	7.875	7.937	8.187	0.312			11.4461	11.348	0.0981429		11.5	11.845	-0.345		11.187	10.562	8.437	11.33	9.884	8.071		11.5	10.062	8.375	11.332	9.936	8.268		11.5	9.75	7.937	11.327	9.886	8.099		11.625	11.812	11.562	11.481	11.703	11.84
11.4461	8	0	0	0		8	7.812	7.937	8.187	0.375			11.4461	11.348	0.0981429		11.5	11.845	-0.345		11.187	10.562	8.437	11.329	9.884	8.066		11.437	10.062	8.375	11.332	9.936	8.267		11.437	9.75	7.937	11.327	9.886	8.096		11.625	11.812	11.562	11.48	11.703	11.84
11.4371	8	0	0	0		8	7.875	7.937	8.25	0.375			11.4371	11.347	0.0901429		11.5	11.845	-0.345		11.187	10.562	8.437	11.329	9.884	8.06		11.5	10.062	8.375	11.331	9.936	8.266		11.437	9.75	7.937	11.326	9.885	8.093		11.625	11.812	11.562	11.48	11.703	11.84
11.4461	8	0	0	0		8	7.812	7.937	8.187	0.375			11.4461	11.347	0.0991429		11.5	11.845	-0.345		11.187	10.562	8.375	11.328	9.884	8.055		11.437	10.062	8.375	11.331	9.936	8.265		11.437	9.75	7.937	11.326	9.885	8.09		11.625	11.812	11.562	11.48	11.702	11.84
11.4461	8	0	0	0		8	7.875	7.937	8.187	0.312			11.4461	11.346	0.100143		11.5	11.845	-0.345		11.187	10.562	8.375	11.328	9.883	8.049		11.5	10.062	8.375	11.33	9.935	8.264		11.5	9.75	7.937	11.325	9.885	8.087		11.625	11.812	11.562	11.479	11.702	11.839
11.4461	8	0	0	0		8	7.812	7.937	8.187	0.375			11.4461	11.346	0.100143		11.5	11.845	-0.345		11.187	10.562	8.375	11.327	9.883	8.044		11.5	10.062	8.375	11.33	9.935	8.263		11.5	9.75	7.937	11.325	9.885	8.084		11.625	11.812	11.562	11.479	11.702	11.839
11.4461	8	0	0	0		8	7.812	7.937	8.187	0.375			11.4461	11.345	0.101143		11.5	11.845	-0.345		11.187	10.562	8.375	11.327	9.883	8.039		11.5	10.062	8.375	11.33	9.935	8.262		11.437	9.75	7.937	11.325	9.885	8.082		11.625	11.812	11.562	11.478	11.702	11.839
11.4461	8	0	0	0		8	7.812	7.937	8.187	0.375			11.4461	11.345	0.101143		11.5	11.844	-0.344		11.187	10.562	8.312	11.327	9.883	8.039		11.437	10.062	8.375	11.329	9.935	8.261		11.5	9.75	7.937	11.324	9.885	8.08		11.625	11.812	11.562	11.478	11.701	11.839
11.4461	8	0	0	0		8	7.812	7.875	8.125	0.313			11.4461	11.345	0.101143		11.5	11.844	-0.344		11.187	10.625	8.312	11.326	9.883	8.038		11.5	10.062	8.375	11.329	9.935	8.259		11.437	9.75	7.937	11.324	9.885	8.079		11.625	11.812	11.562	11.477	11.701	11.839
11.4461	8	0	0	0		8	7.812	7.875	8.125	0.313			11.4461	11.344	0.102143		11.5	11.844	-0.344		11.25	10.562	8.312	11.326	9.883	8.037		11.5	10.062	8.375	11.328	9.934	8.258		11.437	9.75	7.937	11.323	9.884	8.077		11.625	11.812	11.562	11.477	11.701	11.839
11.4371	8	0	0	0		8	7.812	7.875	8.125	0.313			11.4371	11.344	0.0931429		11.5	11.844	-0.344		11.187	10.625	8.25	11.325	9.883	8.037		11.5	10.062	8.375	11.328	9.934	8.257		11.437	9.75	7.937	11.323	9.884	8.076		11.625	11.812	11.562	11.477	11.701	11.839
11.4461	8.062	0	0	0		8.062	7.812	7.875	8.125	0.313			11.4461	11.343	0.103143		11.5	11.844	-0.344		11.187	10.625	8.25	11.325	9.882	8.036		11.5	10.062	8.375	11.327	9.934	8.256		11.437	9.75	7.875	11.322	9.884	8.074		11.625	11.812	11.562	11.476	11.7	11.839
11.4461	8.062	0	0	0		8.062	7.812	7.937	8.187	0.375			11.4461	11.343	0.103143		11.5	11.844	-0.344		11.187	10.562	8.25	11.324	9.882	8.035		11.5	10.062	8.375	11.327	9.934	8.255		11.5	9.75	7.875	11.322	9.884	8.073		11.625	11.812	11.562	11.476	11.7	11.839
11.4461	8	0	0	0		8	7.812	7.937	8.187	0.375			11.4461	11.342	0.104143		11.5	11.844	-0.344		11.187	10.625	8.25	11.324	9.882	8.035		11.437	10.062	8.375	11.326	9.934	8.254		11.437	9.75	7.875	11.321	9.884	8.071		11.625	11.812	11.562	11.475	11.7	11.839
11.4461	8	0	0	0		8	7.75	7.875	8.125	0.375			11.4461	11.342	0.104143		11.5	11.844	-0.344		11.187	10.562	8.25	11.323	9.882	8.034		11.5	10.062	8.375	11.326	9.933	8.253		11.437	9.75	7.875	11.321	9.884	8.069		11.625	11.812	11.562	11.475	11.7	11.839
11.4461	8	0	0	0		8	7.75	7.875	8.125	0.375			11.4461	11.342	0.104143		11.5	11.844	-0.344		11.187	10.625	8.187	11.323	9.882	8.034		11.5	10.062	8.375	11.325	9.933	8.251		11.437	9.75	7.875	11.321	9.884	8.068		11.625	11.812	11.562	11.475	11.699	11.839
11.4461	8	0	0	0		8	7.812	7.875	8.125	0.313			11.4461	11.341	0.105143		11.5	11.843	-0.343		11.25	10.625	8.187	11.322	9.882	8.033		11.5	10.062	8.375	11.325	9.933	8.25		11.437	9.75	7.875	11.32	9.883	8.066		11.625	11.812	11.562	11.474	11.699	11.838
11.4461	8	0	0	0		8	7.75	7.875	8.125	0.375			11.4461	11.341	0.105143		11.5	11.843	-0.343		11.187	10.625	8.187	11.322	9.881	8.032		11.5	10.062	8.375	11.325	9.933	8.249		11.437	9.75	7.875	11.32	9.883	8.065		11.625	11.812	11.562	11.474	11.699	11.838
11.4371	8	0	0	0		8	7.75	7.875	8.125	0.375			11.4371	11.34	0.0971429		11.5	11.843	-0.343		11.187	10.562	8.187	11.322	9.881	8.032		11.5	10.062	8.375	11.324	9.933	8.248		11.437	9.75	7.875	11.319	9.883	8.063		11.625	11.812	11.562	11.473	11.699	11.838
11.4461	8	0	0	0		8	7.812	7.875	8.125	0.313			11.4461	11.34	0.106143		11.5	11.843	-0.343		11.187	10.625	8.187	11.321	9.881	8.031		11.437	10.062	8.375	11.324	9.932	8.247		11.437	9.75	7.875	11.319	9.883	8.062		11.625	11.812	11.562	11.473	11.698	11.838
11.4371	8	0	0	0		8	7.812	7.875	8.062	0.25			11.4371	11.339	0.0981429		11.5	11.843	-0.343		11.187	10.625	8.187	11.321	9.881	8.03		11.5	10.062	8.375	11.323	9.932	8.246		11.437	9.75	7.875	11.318	9.883	8.06		11.625	11.812	11.562	11.473	11.698	11.838
11.4371	8	0	0	0		8	7.75	7.812	8.062	0.312			11.4371	11.339	0.0981429		11.5	11.843	-0.343		11.187	10.625	8.125	11.32	9.881	8.028		11.5	10.062	8.375	11.323	9.932	8.244		11.5	9.75	7.875	11.318	9.883	8.057		11.625	11.812	11.562	11.472	11.698	11.838
11.4371	8	0	0	0		8	7.75	7.875	8.062	0.312			11.4371	11.338	0.0991429		11.5	11.843	-0.343		11.187	10.625	8.125	11.32	9.881	8.021		11.5	10.062	8.375	11.322	9.932	8.242		11.437	9.75	7.875	11.317	9.882	8.053		11.625	11.812	11.562	11.472	11.698	11.838
11.4371	8	0	0	0		8	7.75	7.875	8.062	0.312			11.4371	11.338	0.0991429		11.5	11.843	-0.343		11.187	10.562	8.125	11.319	9.88	8.015		11.437	10.062	8.375	11.322	9.932	8.24		11.437	9.75	7.875	11.317	9.882	8.048		11.625	11.812	11.562	11.471	11.697	11.838
11.4371	8	0	0	0		8	7.75	7.875	8.062	0.312			11.4371	11.337	0.100143		11.5	11.842	-0.342		11.187	10.625	8.125	11.319	9.88	8.009		11.5	10.062	8.375	11.321	9.931	8.238		11.437	9.75	7.875	11.317	9.882	8.043		11.625	11.812	11.562	11.471	11.697	11.838
11.4461	8	0	0	0		8	7.75	7.875	8.062	0.312			11.4461	11.337	0.109143		11.5	11.842	-0.342		11.187	10.625	8.125	11.318	9.88	8.003		11.5	10.062	8.375	11.321	9.931	8.237		11.437	9.75	7.812	11.316	9.882	8.038		11.625	11.812	11.562	11.47	11.697	11.838
11.4461	8	0	0	0		8	7.75	7.875	8.062	0.312			11.4461	11.336	0.110143		11.5	11.842	-0.342		11.187	10.625	8.062	11.318	9.88	7.997		11.437	10.062	8.375	11.321	9.931	8.235		11.437	9.75	7.812	11.316	9.882	8.033		11.625	11.812	11.562	11.47	11.697	11.838
11.4461	8	0	0	0		8	7.75	7.875	8	0.25			11.4461	11.336	0.110143		11.5	11.842	-0.342		11.187	10.625	8.062	11.318	9.88	7.99		11.437	10.062	8.375	11.32	9.931	8.233		11.437	9.75	7.812	11.315	9.881	8.028		11.625	11.812	11.562	11.47	11.696	11.837
11.4461	7.937	0	0	0		7.937	7.75	7.875	8	0.25			11.4461	11.335	0.111143		11.5	11.842	-0.342		11.187	10.625	8.062	11.317	9.879	7.984		11.437	10.062	8.375	11.32	9.931	8.231		11.437	9.75	7.812	11.315	9.881	8.024		11.625	11.812	11.562	11.469	11.696	11.837
11.4371	7.937	0	0	0		7.937	7.687	7.875	8	0.313			11.4371	11.335	0.102143		11.5	11.842	-0.342		11.187	10.625	8.062	11.317	9.879	7.978		11.437	10.062	8.375	11.319	9.93	8.229		11.437	9.75	7.812	11.314	9.881	8.019		11.625	11.812	11.562	11.469	11.696	11.837
11.4461	7.937	0	0	0		7.937	7.687	7.875	8	0.313			11.4461	11.334	0.112143		11.5	11.842	-0.342		11.187	10.562	8.062	11.316	9.879	7.972		11.5	10.062	8.375	11.319	9.93	8.227		11.437	9.75	7.812	11.314	9.881	8.014		11.625	11.812	11.562	11.468	11.696	11.837
11.4371	7.937	0	0	0		7.937	7.75	7.812	8	0.25			11.4371	11.334	0.103143		11.5	11.841	-0.341		11.187	10.625	8	11.316	9.879	7.966		11.5	10.062	8.375	11.318	9.93	8.225		11.5	9.75	7.812	11.313	9.881	8.009		11.625	11.812	11.562	11.468	11.695	11.837
11.4461	7.937	0	0	0		7.937	7.687	7.75	7.937	0.25			11.4461	11.333	0.113143		11.5	11.841	-0.341		11.187	10.562	8	11.315	9.879	7.959		11.5	10.062	8.375	11.318	9.93	8.223		11.437	9.75	7.812	11.313	9.881	8.004		11.625	11.812	11.562	11.468	11.695	11.837
11.4373	7.937	0	0	0		7.937	7.625	7.75	7.937	0.312			11.4373	11.333	0.104286		11.5	11.841	-0.341		11.25	10.625	8	11.315	9.878	7.953		11.437	10.062	8.375	11.317	9.93	8.221		11.437	9.75	7.75	11.312	9.88	7.999		11.625	11.812	11.562	11.467	11.695	11.837
11.4461	7.937	0	0	0		7.937	7.625	7.75	7.937	0.312			11.4461	11.332	0.114143		11.5	11.841	-0.341		11.187	10.562	8	11.314	9.878	7.947		11.5	10.062	8.375	11.317	9.929	8.219		11.437	9.75	7.75	11.312	9.88	7.995		11.625	11.812	11.562	11.467	11.695	11.837
11.4461	7.875	0	0	0		7.875	7.625	7.687	7.875	0.25			11.4461	11.332	0.114143		11.5	11.841	-0.341		11.187	10.625	8	11.314	9.878	7.941		11.437	10.062	8.375	11.316	9.929	8.217		11.437	9.75	7.75	11.312	9.88	7.99		11.625	11.812	11.562	11.466	11.694	11.837
11.4461	7.875	0	0	0		7.875	7.625	7.75	7.875	0.25			11.4461	11.331	0.115143		11.5	11.841	-0.341		11.187	10.625	7.937	11.314	9.878	7.935		11.437	10.062	8.375	11.316	9.929	8.216		11.437	9.75	7.75	11.311	9.88	7.985		11.625	11.812	11.562	11.466	11.694	11.837
11.4461	7.937	0	0	0		7.937	7.625	7.75	7.875	0.312			11.4461	11.331	0.115143		11.5	11.84	-0.34		11.25	10.625	7.937	11.313	9.878	7.928		11.437	10.062	8.375	11.316	9.929	8.214		11.437	9.75	7.75	11.311	9.88	7.98		11.625	11.812	11.562	11.466	11.694	11.836
11.455	7.937	0	0	0		7.937	7.625	7.75	7.875	0.312			11.455	11.33	0.125		11.5	11.84	-0.34		11.187	10.625	7.937	11.313	9.877	7.922		11.437	10.062	8.375	11.315	9.929	8.212		11.437	9.75	7.75	11.31	9.879	7.975		11.625	11.812	11.562	11.465	11.694	11.836
11.4461	7.937	0	0	0		7.937	7.687	7.75	7.875	0.25			11.4461	11.33	0.116143		11.5	11.84	-0.34		11.187	10.562	7.937	11.312	9.877	7.916		11.437	10.062	8.375	11.315	9.928	8.21		11.437	9.75	7.75	11.31	9.879	7.97		11.625	11.812	11.562	11.465	11.693	11.836
11.4461	7.875	0	0	0		7.875	7.687	7.75	7.875	0.188			11.4461	11.329	0.117143		11.5	11.84	-0.34		11.187	10.625	7.937	11.312	9.877	7.91		11.5	10.062	8.375	11.314	9.928	8.208		11.437	9.75	7.687	11.309	9.879	7.966		11.625	11.812	11.562	11.464	11.693	11.836
11.455	7.875	0	0	0		7.875	7.562	7.75	7.875	0.313			11.455	11.329	0.126		11.5	11.84	-0.34		11.187	10.625	7.875	11.311	9.877	7.904		11.5	10.062	8.375	11.314	9.928	8.206		11.437	9.75	7.687	11.309	9.879	7.961		11.625	11.812	11.562	11.464	11.693	11.836
11.4371	7.812	0	0	0		7.812	7.562	7.75	7.875	0.313			11.4371	11.328	0.109143		11.5	11.84	-0.34		11.187	10.625	7.875	11.311	9.877	7.897		11.437	10.062	8.375	11.313	9.928	8.204		11.5	9.75	7.687	11.308	9.879	7.956		11.625	11.812	11.562	11.463	11.693	11.836
11.4371	7.812	0	0	0		7.812	7.5	7.687	7.875	0.375			11.4371	11.328	0.109143		11.5	11.839	-0.339		11.187	10.625	7.812	11.31	9.876	7.891		11.437	10.062	8.375	11.313	9.928	8.202		11.437	9.75	7.687	11.308	9.879	7.951		11.625	11.812	11.562	11.463	11.692	11.836
11.4461	7.812	0	0	0		7.812	7.5	7.687	7.812	0.312			11.4461	11.327	0.119143		11.5	11.839	-0.339		11.187	10.625	7.812	11.31	9.876	7.885		11.437	10.062	8.375	11.312	9.928	8.2		11.437	9.75	7.687	11.308	9.878	7.946		11.625	11.812	11.562	11.463	11.692	11.836
11.4461	7.812	0	0	0		7.812	7.562	7.687	7.812	0.25			11.4461	11.327	0.119143		11.5	11.839	-0.339		11.187	10.625	7.812	11.309	9.876	7.879		11.437	10.062	8.375	11.312	9.927	8.198		11.437	9.75	7.687	11.307	9.878	7.941		11.625	11.812	11.562	11.462	11.692	11.836
11.4283	7.875	0	0	0		7.875	7.562	7.687	7.812	0.313			11.4283	11.326	0.102286		11.5	11.839	-0.339		11.187	10.625	7.75	11.309	9.876	7.873		11.437	10.062	8.375	11.311	9.927	8.196		11.437	9.75	7.687	11.307	9.878	7.937		11.625	11.812	11.562	11.462	11.692	11.836
11.4461	7.875	0	0	0		7.875	7.562	7.687	7.812	0.313			11.4461	11.326	0.120143		11.5	11.839	-0.339		11.187	10.625	7.75	11.309	9.876	7.867		11.437	10.062	8.375	11.311	9.927	8.194		11.437	9.75	7.687	11.306	9.878	7.932		11.625	11.812	11.562	11.461	11.691	11.836
11.4371	7.875	0	0	0		7.875	7.562	7.687	7.812	0.313			11.4371	11.325	0.112143		11.5	11.839	-0.339		11.187	10.625	7.75	11.308	9.875	7.86		11.437	10.062	8.312	11.311	9.927	8.193		11.437	9.75	7.687	11.306	9.878	7.927		11.625	11.812	11.562	11.461	11.691	11.835
11.4371	7.812	0	0	0		7.812	7.562	7.687	7.812	0.25			11.4371	11.325	0.112143		11.5	11.838	-0.338		11.187	10.625	7.75	11.308	9.875	7.854		11.437	10.062	8.312	11.31	9.927	8.191		11.437	9.75	7.687	11.305	9.877	7.922		11.625	11.812	11.562	11.461	11.691	11.835
11.4371	7.812	0	0	0		7.812	7.562	7.687	7.75	0.25			11.4371	11.324	0.113143		11.5	11.838	-0.338		11.187	10.562	7.75	11.307	9.875	7.848		11.437	10.062	8.312	11.31	9.926	8.189		11.437	9.75	7.687	11.305	9.877	7.917		11.625	11.812	11.562	11.46	11.691	11.835
11.4371	7.812	0	0	0		7.812	7.562	7.625	7.812	0.25			11.4371	11.324	0.113143		11.5	11.838	-0.338		11.187	10.625	7.75	11.307	9.875	7.844		11.437	10.062	8.312	11.309	9.926	8.186		11.437	9.75	7.687	11.304	9.877	7.913		11.625	11.812	11.562	11.46	11.69	11.835
11.4371	7.812	0	0	0		7.812	7.5	7.625	7.75	0.312			11.4371	11.323	0.114143		11.5	11.838	-0.338		11.187	10.625	7.687	11.306	9.874	7.841		11.5	10.062	8.312	11.309	9.926	8.184		11.437	9.75	7.625	11.304	9.877	7.91		11.625	11.812	11.562	11.459	11.69	11.835
11.4461	7.812	0	0	0		7.812	7.5	7.625	7.75	0.312			11.4461	11.323	0.123143		11.5	11.838	-0.338		11.187	10.625	7.75	11.306	9.874	7.837		11.437	10.062	8.312	11.308	9.926	8.182		11.437	9.75	7.625	11.304	9.876	7.906		11.625	11.812	11.562	11.459	11.69	11.835
11.4371	7.812	0	0	0		7.812	7.5	7.625	7.75	0.312			11.4371	11.322	0.115143		11.5	11.838	-0.338		11.187	10.625	7.687	11.305	9.874	7.834		11.437	10.062	8.312	11.308	9.925	8.179		11.437	9.75	7.625	11.303	9.876	7.902		11.625	11.812	11.562	11.458	11.69	11.835
11.4283	7.875	0	0	0		7.875	7.5	7.687	7.812	0.375			11.4283	11.322	0.106286		11.5	11.837	-0.337		11.187	10.562	7.687	11.305	9.874	7.83		11.437	10.062	8.312	11.307	9.925	8.177		11.437	9.75	7.625	11.303	9.876	7.898		11.625	11.812	11.562	11.458	11.689	11.835
11.4373	7.875	0	0	0		7.875	7.5	7.687	7.812	0.375			11.4373	11.321	0.116286		11.5	11.837	-0.337		11.187	10.562	7.687	11.305	9.873	7.827		11.437	10.062	8.312	11.307	9.925	8.175		11.437	9.75	7.625	11.302	9.876	7.894		11.625	11.812	11.562	11.458	11.689	11.835
11.4461	7.875	0	0	0		7.875	7.562	7.687	7.812	0.313			11.4461	11.321	0.125143		11.5	11.837	-0.337		11.187	10.562	7.687	11.304	9.873	7.823		11.437	10.062	8.312	11.306	9.925	8.172		11.437	9.75	7.625	11.302	9.876	7.89		11.625	11.812	11.562	11.457	11.689	11.834
11.4373	7.875	0	0	0		7.875	7.562	7.687	7.812	0.313			11.4373	11.32	0.117286		11.5	11.837	-0.337		11.187	10.562	7.687	11.304	9.873	7.82		11.5	10.062	8.312	11.306	9.925	8.17		11.437	9.75	7.625	11.301	9.875	7.887		11.625	11.812	11.562	11.457	11.689	11.834
11.4371	7.875	0	0	0		7.875	7.562	7.75	7.75	0.313			11.4371	11.32	0.117143		11.5	11.837	-0.337		11.187	10.625	7.687	11.303	9.873	7.816		11.437	10.062	8.312	11.306	9.924	8.168		11.437	9.75	7.625	11.301	9.875	7.883		11.625	11.812	11.562	11.456	11.688	11.834
11.4371	7.875	0	0	0		7.875	7.562	7.687	7.75	0.313			11.4371	11.319	0.118143		11.5	11.837	-0.337		11.187	10.625	7.687	11.303	9.872	7.813		11.437	10.062	8.312	11.305	9.924	8.165		11.437	9.75	7.625	11.3	9.875	7.879		11.625	11.812	11.562	11.456	11.688	11.834
11.4461	7.875	0	0	0		7.875	7.5	7.687	7.75	0.375			11.4461	11.319	0.127143		11.5	11.836	-0.336		11.187	10.625	7.625	11.302	9.872	7.809		11.437	10.062	8.312	11.305	9.924	8.163		11.437	9.75	7.625	11.3	9.875	7.875		11.625	11.812	11.562	11.456	11.688	11.834
11.4371	7.875	0	0	0		7.875	7.5	7.687	7.75	0.375			11.4371	11.318	0.119143		11.5	11.836	-0.336		11.187	10.625	7.625	11.302	9.872	7.806		11.5	10.062	8.312	11.304	9.924	8.16		11.437	9.75	7.625	11.299	9.874	7.871		11.625	11.812	11.562	11.455	11.688	11.834
11.4371	7.875	0	0	0		7.875	7.5	7.687	7.75	0.375			11.4371	11.318	0.119143		11.5	11.836	-0.336		11.187	10.625	7.625	11.301	9.872	7.802		11.5	10.062	8.312	11.304	9.924	8.158		11.437	9.75	7.625	11.299	9.874	7.868		11.625	11.812	11.562	11.455	11.687	11.834
11.4371	7.875	0	0	0		7.875	7.5	7.687	7.687	0.375			11.4371	11.317	0.120143		11.5	11.836	-0.336		11.187	10.625	7.625	11.301	9.871	7.799		11.437	10.062	8.312	11.303	9.923	8.156		11.437	9.75	7.625	11.299	9.874	7.864		11.625	11.812	11.562	11.454	11.687	11.834
11.4283	7.875	0	0	0		7.875	7.5	7.687	7.687	0.375			11.4283	11.317	0.111286		11.5	11.836	-0.336		11.187	10.625	7.625	11.301	9.871	7.795		11.437	10.062	8.312	11.303	9.923	8.153		11.437	9.75	7.625	11.298	9.874	7.86		11.625	11.812	11.562	11.454	11.687	11.834
11.4371	7.812	0	0	0		7.812	7.5	7.687	7.687	0.312			11.4371	11.316	0.121143		11.5	11.836	-0.336		11.187	10.625	7.625	11.3	9.871	7.792		11.437	10.062	8.312	11.302	9.923	8.151		11.437	9.75	7.625	11.298	9.873	7.856		11.625	11.812	11.562	11.453	11.687	11.833
11.4371	7.812	0	0	0		7.812	7.5	7.687	7.687	0.312			11.4371	11.316	0.121143		11.5	11.835	-0.335		11.187	10.562	7.562	11.3	9.871	7.788		11.437	10.062	8.312	11.302	9.923	8.149		11.437	9.75	7.625	11.297	9.873	7.852		11.625	11.812	11.562	11.453	11.686	11.833
11.4371	7.812	0	0	0		7.812	7.437	7.625	7.625	0.375			11.4371	11.316	0.121143		11.5	11.835	-0.335		11.187	10.562	7.562	11.299	9.87	7.785		11.437	10.062	8.312	11.301	9.923	8.146		11.437	9.75	7.625	11.297	9.873	7.849		11.625	11.812	11.562	11.453	11.686	11.833
11.4371	7.812	0	0	0		7.812	7.437	7.625	7.687	0.375			11.4371	11.315	0.122143		11.5	11.835	-0.335		11.187	10.625	7.562	11.299	9.87	7.781		11.437	10.062	8.312	11.301	9.922	8.144		11.437	9.75	7.625	11.296	9.873	7.845		11.625	11.812	11.562	11.452	11.686	11.833
11.4373	7.75	0	0	0		7.75	7.437	7.562	7.687	0.313			11.4373	11.315	0.122286		11.5	11.835	-0.335		11.187	10.625	7.562	11.298	9.87	7.778		11.437	10.062	8.312	11.301	9.922	8.141		11.437	9.75	7.562	11.296	9.872	7.841		11.625	11.812	11.562	11.452	11.686	11.833
11.4371	7.75	0	0	0		7.75	7.437	7.562	7.687	0.313			11.4371	11.314	0.123143		11.5	11.835	-0.335		11.187	10.562	7.562	11.298	9.87	7.775		11.437	10.062	8.312	11.3	9.922	8.139		11.437	9.75	7.562	11.295	9.872	7.837		11.625	11.812	11.562	11.451	11.685	11.833
11.4284	7.75	0	0	0		7.75	7.437	7.562	7.625	0.313			11.4284	11.314	0.114429		11.5	11.834	-0.334		11.187	10.562	7.562	11.297	9.869	7.771		11.5	10.062	8.312	11.3	9.922	8.137		11.437	9.75	7.562	11.295	9.872	7.833		11.625	11.812	11.562	11.451	11.685	11.833
11.4283	7.75	0	0	0		7.75	7.437	7.562	7.625	0.313			11.4283	11.313	0.115286		11.5	11.834	-0.334		11.187	10.625	7.5	11.297	9.869	7.768		11.437	10.062	8.312	11.299	9.921	8.134		11.437	9.75	7.562	11.295	9.872	7.83		11.625	11.812	11.562	11.451	11.685	11.833
11.4373	7.75	0	0	0		7.75	7.437	7.562	7.625	0.313			11.4373	11.313	0.124286		11.5	11.834	-0.334		11.187	10.562	7.5	11.296	9.869	7.764		11.437	10.062	8.312	11.299	9.921	8.132		11.437	9.75	7.562	11.294	9.872	7.826		11.625	11.812	11.562	11.45	11.685	11.833
11.4283	7.75	0	0	0		7.75	7.437	7.625	7.687	0.313			11.4283	11.312	0.116286		11.5	11.834	-0.334		11.187	10.562	7.5	11.296	9.868	7.761		11.437	10.062	8.312	11.298	9.921	8.13		11.437	9.75	7.562	11.294	9.871	7.822		11.625	11.812	11.562	11.45	11.684	11.833
11.4371	7.75	0	0	0		7.75	7.375	7.562	7.625	0.375			11.4371	11.312	0.125143		11.5	11.834	-0.334		11.187	10.562	7.5	11.296	9.868	7.757		11.437	10.062	8.312	11.298	9.921	8.127		11.437	9.75	7.5	11.293	9.871	7.818		11.625	11.812	11.562	11.449	11.684	11.832
11.4371	7.75	0	0	0		7.75	7.375	7.5	7.625	0.375			11.4371	11.311	0.126143		11.5	11.834	-0.334		11.187	10.562	7.5	11.295	9.868	7.754		11.437	10.062	8.312	11.297	9.921	8.125		11.437	9.75	7.5	11.293	9.871	7.814		11.625	11.812	11.562	11.449	11.684	11.832
11.4283	7.687	0	0	0		7.687	7.375	7.5	7.625	0.312			11.4283	11.311	0.117286		11.5	11.833	-0.333		11.187	10.625	7.5	11.295	9.868	7.75		11.437	10.062	8.312	11.297	9.92	8.123		11.437	9.75	7.5	11.292	9.871	7.81		11.625	11.812	11.562	11.448	11.684	11.832
11.4461	7.687	0	0	0		7.687	7.312	7.437	7.562	0.375			11.4461	11.31	0.136143		11.5	11.833	-0.333		11.187	10.625	7.5	11.294	9.867	7.747		11.437	10.062	8.312	11.296	9.92	8.12		11.437	9.75	7.437	11.292	9.87	7.807		11.625	11.812	11.562	11.448	11.683	11.832
11.4371	7.687	0	0	0		7.687	7.312	7.437	7.562	0.375			11.4371	11.31	0.127143		11.5	11.833	-0.333		11.187	10.562	7.5	11.294	9.867	7.743		11.437	10.062	8.312	11.296	9.92	8.118		11.437	9.75	7.437	11.291	9.87	7.802		11.625	11.812	11.562	11.448	11.683	11.832
11.4283	7.687	0	0	0		7.687	7.25	7.437	7.5	0.437			11.4283	11.309	0.119286		11.5	11.833	-0.333		11.187	10.562	7.5	11.293	9.867	7.738		11.437	10.062	8.312	11.295	9.92	8.114		11.437	9.75	7.437	11.291	9.87	7.798		11.625	11.812	11.562	11.447	11.683	11.832
11.4371	7.625	0	0	0		7.625	7.25	7.375	7.5	0.375			11.4371	11.309	0.128143		11.5	11.833	-0.333		11.187	10.562	7.5	11.293	9.866	7.733		11.437	10.062	8.312	11.295	9.919	8.111		11.437	9.75	7.375	11.29	9.869	7.793		11.625	11.812	11.562	11.447	11.683	11.832
11.4371	7.625	0	0	0		7.625	7.187	7.375	7.437	0.438			11.4371	11.308	0.129143		11.5	11.832	-0.332		11.187	10.562	7.437	11.292	9.866	7.728		11.437	10.062	8.25	11.295	9.919	8.108		11.437	9.75	7.375	11.29	9.869	7.788		11.625	11.812	11.562	11.446	11.682	11.832
11.4283	7.625	0	0	0		7.625	7.187	7.312	7.437	0.438			11.4283	11.308	0.120286		11.5	11.832	-0.332		11.187	10.562	7.437	11.292	9.866	7.723		11.5	10.062	8.25	11.294	9.919	8.105		11.437	9.75	7.375	11.29	9.869	7.784		11.625	11.812	11.562	11.446	11.682	11.831
11.4284	7.625	0	0	0		7.625	7.125	7.312	7.437	0.5			11.4284	11.307	0.121429		11.5	11.832	-0.332		11.187	10.562	7.375	11.291	9.865	7.718		11.5	10.062	8.25	11.294	9.919	8.102		11.437	9.75	7.312	11.289	9.868	7.779		11.625	11.812	11.562	11.445	11.682	11.831
11.4461	7.625	0	0	0		7.625	7.062	7.312	7.375	0.563			11.4461	11.307	0.139143		11.5	11.832	-0.332		11.187	10.562	7.375	11.291	9.865	7.713		11.437	10.062	8.312	11.293	9.918	8.099		11.437	9.75	7.312	11.289	9.868	7.774		11.625	11.812	11.562	11.445	11.681	11.831
11.4371	7.625	0	0	0		7.625	7.062	7.25	7.312	0.563			11.4371	11.306	0.131143		11.5	11.831	-0.331		11.187	10.562	7.312	11.291	9.864	7.708		11.437	10.062	8.25	11.293	9.918	8.095		11.437	9.75	7.25	11.288	9.867	7.77		11.625	11.812	11.562	11.445	11.681	11.831
11.4461	7.625	0	0	0		7.625	7.062	7.25	7.312	0.563			11.4461	11.306	0.140143		11.5	11.831	-0.331		11.187	10.562	7.312	11.29	9.864	7.703		11.437	10.062	8.25	11.292	9.918	8.092		11.437	9.75	7.25	11.288	9.867	7.765		11.625	11.812	11.562	11.444	11.681	11.831
11.4461	7.625	0	0	0		7.625	7	7.25	7.25	0.625			11.4461	11.305	0.141143		11.5	11.831	-0.331		11.187	10.562	7.25	11.29	9.864	7.698		11.437	10.062	8.25	11.292	9.917	8.089		11.437	9.75	7.25	11.287	9.867	7.76		11.625	11.812	11.562	11.444	11.681	11.831
11.4283	7.562	0	0	0		7.562	6.937	7.25	7.187	0.625			11.4283	11.304	0.124286		11.5	11.831	-0.331		11.187	10.562	7.25	11.289	9.863	7.693		11.437	10.062	8.25	11.291	9.917	8.086		11.437	9.75	7.187	11.287	9.866	7.755		11.625	11.812	11.562	11.443	11.68	11.831
11.4371	7.562	0	0	0		7.562	6.937	7.187	7.187	0.625			11.4371	11.304	0.133143		11.5	11.83	-0.33		11.187	10.562	7.25	11.289	9.863	7.688		11.437	10.062	8.25	11.291	9.917	8.083		11.437	9.75	7.125	11.286	9.866	7.751		11.625	11.812	11.562	11.443	11.68	11.83
11.4371	7.562	0	0	0		7.562	6.875	7.187	7.125	0.687			11.4371	11.303	0.134143		11.5	11.83	-0.33		11.187	10.562	7.187	11.288	9.862	7.684		11.437	10.062	8.25	11.29	9.917	8.08		11.437	9.75	7.125	11.286	9.866	7.746		11.625	11.812	11.562	11.442	11.68	11.83
11.4283	7.562	0	0	0		7.562	6.875	7.125	7.125	0.687			11.4283	11.303	0.125286		11.5	11.83	-0.33		11.187	10.562	7.125	11.288	9.862	7.679		11.437	10.062	8.25	11.29	9.916	8.076		11.437	9.75	7.062	11.285	9.865	7.741		11.562	11.812	11.562	11.442	11.68	11.83
11.4283	7.5	0	0	0		7.5	6.812	7.125	7.125	0.688			11.4283	11.302	0.126286		11.5	11.83	-0.33		11.187	10.562	7.125	11.287	9.862	7.674		11.437	10.062	8.25	11.289	9.916	8.073		11.437	9.75	7.062	11.285	9.865	7.737		11.562	11.812	11.562	11.442	11.679	11.83
11.4461	7.5	0	0	0		7.5	6.75	7.062	7	0.75			11.4461	11.302	0.144143		11.5	11.83	-0.33		11.187	10.562	7.062	11.287	9.861	7.669		11.437	10.062	8.25	11.289	9.916	8.07		11.437	9.75	7	11.285	9.864	7.732		11.625	11.812	11.562	11.441	11.679	11.83
11.4283	7.5	0	0	0		7.5	6.75	7.062	7	0.75			11.4283	11.301	0.127286		11.5	11.829	-0.329		11.187	10.562	7	11.286	9.861	7.664		11.5	10.062	8.25	11.288	9.915	8.067		11.437	9.75	7	11.284	9.864	7.727		11.625	11.812	11.562	11.441	11.679	11.83
11.4283	7.5	0	0	0		7.5	6.75	7.062	6.937	0.75			11.4283	11.301	0.127286		11.5	11.829	-0.329		11.187	10.562	7	11.286	9.86	7.659		11.437	10.062	8.25	11.288	9.915	8.064		11.437	9.75	6.937	11.284	9.864	7.723		11.625	11.812	11.562	11.44	11.679	11.83
11.4283	7.5	0	0	0		7.5	6.75	7.062	7	0.75			11.4283	11.3	0.128286		11.5	11.829	-0.329		11.187	10.562	6.937	11.286	9.86	7.654		11.437	10.062	8.25	11.288	9.915	8.061		11.437	9.75	6.937	11.283	9.863	7.718		11.625	11.812	11.562	11.44	11.678	11.83
11.4283	7.5	0	0	0		7.5	6.687	7	6.937	0.813			11.4283	11.3	0.128286		11.5	11.829	-0.329		11.187	10.562	6.937	11.285	9.859	7.649		11.437	10.062	8.25	11.287	9.915	8.057		11.437	9.75	6.875	11.283	9.863	7.713		11.625	11.812	11.562	11.439	11.678	11.829
11.4371	7.5	0	0	0		7.5	6.687	7	6.875	0.813			11.4371	11.299	0.138143		11.5	11.828	-0.328		11.187	10.562	6.875	11.285	9.859	7.644		11.437	10.062	8.25	11.287	9.914	8.054		11.437	9.75	6.875	11.282	9.863	7.708		11.625	11.812	11.562	11.439	11.678	11.829
11.4283	7.5	0	0	0		7.5	6.687	7	6.937	0.813			11.4283	11.299	0.129286		11.5	11.828	-0.328		11.187	10.562	6.812	11.284	9.859	7.639		11.437	10.062	8.25	11.286	9.914	8.051		11.437	9.75	6.875	11.282	9.862	7.704		11.625	11.812	11.562	11.439	11.678	11.829
11.4371	7.5	0	0	0		7.5	6.687	7	6.875	0.813			11.4371	11.298	0.139143		11.5	11.828	-0.328		11.187	10.562	6.812	11.284	9.858	7.634		11.5	10.062	8.25	11.286	9.914	8.048		11.437	9.75	6.812	11.281	9.862	7.699		11.625	11.812	11.562	11.438	11.677	11.829
11.4283	7.5	0	0	0		7.5	6.687	7	6.875	0.813			11.4283	11.298	0.130286		11.5	11.828	-0.328		11.187	10.562	6.75	11.283	9.858	7.629		11.437	10.062	8.25	11.285	9.914	8.045		11.437	9.75	6.812	11.281	9.861	7.694		11.625	11.812	11.5	11.438	11.677	11.829
11.4371	7.437	0	0	0		7.437	6.687	7	6.875	0.75			11.4371	11.297	0.140143		11.5	11.827	-0.327		11.187	10.562	6.75	11.283	9.857	7.625		11.437	10.062	8.25	11.285	9.913	8.042		11.437	9.75	6.812	11.28	9.861	7.69		11.625	11.812	11.562	11.437	11.677	11.829
11.4371	7.437	0	0	0		7.437	6.687	7	6.812	0.75			11.4371	11.297	0.140143		11.5	11.827	-0.327		11.187	10.562	6.75	11.282	9.857	7.62		11.437	10.062	8.187	11.284	9.913	8.039		11.437	9.75	6.812	11.28	9.861	7.685		11.562	11.812	11.562	11.437	11.677	11.829
11.4194	7.5	0	0	0		7.5	6.75	7	6.75	0.75			11.4194	11.296	0.123429		11.5	11.827	-0.327		11.187	10.562	6.687	11.282	9.857	7.615		11.437	10.062	8.25	11.284	9.913	8.035		11.437	9.75	6.812	11.279	9.86	7.68		11.625	11.812	11.562	11.436	11.676	11.828
11.4283	7.5	0	0	0		7.5	6.75	7	6.687	0.813			11.4283	11.296	0.132286		11.5	11.827	-0.327		11.187	10.562	6.687	11.281	9.856	7.61		11.437	10.062	8.25	11.283	9.912	8.032		11.437	9.75	6.812	11.279	9.86	7.676		11.562	11.812	11.5	11.436	11.676	11.828
11.4371	7.5	0	0	0		7.5	6.75	7	6.75	0.75			11.4371	11.295	0.142143		11.5	11.826	-0.326		11.187	10.562	6.687	11.281	9.856	7.605		11.437	10.062	8.187	11.283	9.912	8.029		11.437	9.687	6.812	11.279	9.86	7.671		11.625	11.812	11.5	11.436	11.676	11.828
11.4371	7.5	0	0	0		7.5	6.75	7	6.75	0.75			11.4371	11.294	0.143143		11.5	11.826	-0.326		11.187	10.562	6.625	11.28	9.855	7.6		11.437	10.062	8.25	11.282	9.912	8.026		11.437	9.75	6.812	11.278	9.859	7.666		11.625	11.812	11.562	11.435	11.676	11.828
11.4106	7.5	0	0	0		7.5	6.75	7.062	6.875	0.75			11.4106	11.294	0.116571		11.5	11.826	-0.326		11.187	10.562	6.625	11.28	9.855	7.595		11.437	10.062	8.187	11.282	9.912	8.023		11.437	9.687	6.812	11.278	9.859	7.662		11.625	11.812	11.562	11.435	11.675	11.828
11.4371	7.5	0	0	0		7.5	6.812	7.062	6.937	0.688			11.4371	11.293	0.144143		11.5	11.826	-0.326		11.187	10.562	6.625	11.28	9.855	7.59		11.437	10.062	8.187	11.281	9.911	8.02		11.437	9.75	6.812	11.277	9.859	7.657		11.625	11.812	11.562	11.434	11.675	11.828
11.4283	7.5	0	0	0		7.5	6.812	7.062	6.937	0.688			11.4283	11.293	0.135286		11.5	11.826	-0.326		11.187	10.562	6.625	11.279	9.854	7.585		11.437	10.062	8.187	11.281	9.911	8.016		11.437	9.75	6.875	11.277	9.858	7.652		11.625	11.812	11.562	11.434	11.675	11.828
11.4283	7.5	0	0	0		7.5	6.875	7.062	6.937	0.625			11.4283	11.292	0.136286		11.437	11.825	-0.388		11.187	10.562	6.625	11.279	9.854	7.58		11.437	10.062	8.187	11.281	9.911	8.013		11.437	9.75	6.875	11.276	9.858	7.647		11.625	11.812	11.5	11.433	11.674	11.827
11.4283	7.5	0	0	0		7.5	6.875	7.125	6.937	0.625			11.4283	11.292	0.136286		11.437	11.825	-0.388		11.187	10.562	6.625	11.278	9.853	7.575		11.437	10.062	8.187	11.28	9.91	8.01		11.437	9.687	6.875	11.276	9.857	7.643		11.562	11.812	11.562	11.433	11.674	11.827
11.4283	7.5	0	0	0		7.5	6.875	7.125	7	0.625			11.4283	11.291	0.137286		11.5	11.825	-0.325		11.187	10.562	6.625	11.278	9.853	7.57		11.437	10.062	8.187	11.28	9.91	8.007		11.437	9.75	6.875	11.275	9.857	7.638		11.562	11.812	11.5	11.432	11.674	11.827
11.4371	7.5	0	0	0		7.5	6.937	7.125	6.937	0.563			11.4371	11.291	0.146143		11.5	11.825	-0.325		11.187	10.562	6.625	11.277	9.853	7.565		11.5	10.062	8.187	11.279	9.91	8.004		11.437	9.687	6.937	11.275	9.857	7.633		11.625	11.812	11.562	11.432	11.674	11.827
11.4283	7.5	0	0	0		7.5	6.937	7.125	6.937	0.563			11.4283	11.29	0.138286		11.5	11.824	-0.324		11.187	10.562	6.625	11.277	9.852	7.561		11.437	10.062	8.187	11.279	9.91	8.001		11.437	9.75	6.937	11.274	9.856	7.629		11.625	11.812	11.5	11.432	11.673	11.827
11.4283	7.5	0	0	0		7.5	6.937	7.125	6.937	0.563			11.4283	11.29	0.138286		11.5	11.824	-0.324		11.187	10.562	6.625	11.276	9.852	7.556		11.437	10.062	8.187	11.278	9.909	7.997		11.437	9.687	6.937	11.274	9.856	7.624		11.562	11.812	11.5	11.431	11.673	11.827
11.4194	7.5	0	0	0		7.5	6.937	7.125	6.937	0.563			11.4194	11.289	0.130429		11.5	11.824	-0.324		11.187	10.562	6.625	11.276	9.851	7.551		11.437	10.062	8.187	11.278	9.909	7.994		11.437	9.687	6.937	11.274	9.856	7.619		11.562	11.812	11.562	11.431	11.673	11.827
11.4283	7.437	0	0	0		7.437	6.937	7.125	7	0.5			11.4283	11.289	0.139286		11.5	11.824	-0.324		11.187	10.562	6.625	11.275	9.851	7.546		11.437	10.062	8.187	11.277	9.909	7.991		11.437	9.687	6.937	11.273	9.855	7.615		11.625	11.812	11.5	11.43	11.673	11.827
11.4283	7.437	0	0	0		7.437	6.937	7.125	6.937	0.5			11.4283	11.288	0.140286		11.5	11.823	-0.323		11.187	10.562	6.625	11.275	9.851	7.541		11.437	10.062	8.187	11.277	9.909	7.988		11.437	9.687	6.937	11.273	9.855	7.61		11.625	11.812	11.562	11.43	11.672	11.826
11.4283	7.437	0	0	0		7.437	6.937	7.125	7	0.5			11.4283	11.288	0.140286		11.5	11.823	-0.323		11.187	10.562	6.625	11.275	9.85	7.536		11.437	10.062	8.187	11.276	9.908	7.985		11.437	9.687	7	11.272	9.854	7.605		11.625	11.812	11.562	11.429	11.672	11.826
11.4283	7.437	0	0	0		7.437	6.937	7.125	7	0.5			11.4283	11.287	0.141286		11.5	11.823	-0.323		11.187	10.562	6.687	11.274	9.85	7.531		11.437	10.062	8.187	11.276	9.908	7.982		11.437	9.687	7	11.272	9.854	7.6		11.562	11.812	11.562	11.429	11.672	11.826
11.4194	7.437	0	0	0		7.437	7	7.125	7	0.437			11.4194	11.287	0.132429		11.5	11.823	-0.323		11.187	10.562	6.687	11.274	9.849	7.526		11.437	10.062	8.187	11.275	9.908	7.979		11.437	9.687	7	11.271	9.854	7.596		11.625	11.812	11.562	11.429	11.672	11.826
11.4283	7.5	0	0	0		7.5	6.937	7.125	6.937	0.563			11.4283	11.286	0.142286		11.5	11.822	-0.322		11.187	10.562	6.687	11.273	9.849	7.521		11.437	10.062	8.187	11.275	9.907	7.975		11.437	9.687	7	11.271	9.853	7.591		11.625	11.812	11.562	11.428	11.671	11.826
11.4283	7.5	0	0	0		7.5	6.937	7.125	6.937	0.563			11.4283	11.286	0.142286		11.437	11.822	-0.385		11.187	10.562	6.687	11.273	9.849	7.516		11.437	10.062	8.187	11.274	9.907	7.972		11.437	9.75	7	11.27	9.853	7.586		11.625	11.812	11.562	11.428	11.671	11.826
11.4283	7.5	0	0	0		7.5	6.937	7.125	6.937	0.563			11.4283	11.285	0.143286		11.437	11.822	-0.385		11.187	10.562	6.687	11.272	9.848	7.511		11.437	10.062	8.125	11.274	9.907	7.969		11.437	9.687	7	11.27	9.853	7.582		11.562	11.812	11.562	11.427	11.671	11.826
11.4106	7.5	0	0	0		7.5	7	7.187	6.937	0.563			11.4106	11.285	0.125571		11.5	11.822	-0.322		11.187	10.562	6.687	11.272	9.848	7.506		11.437	10.062	8.187	11.274	9.907	7.966		11.437	9.687	7	11.269	9.852	7.577		11.562	11.812	11.562	11.427	11.671	11.825
11.4283	7.562	0	0	0		7.562	6.937	7.187	6.875	0.687			11.4283	11.284	0.144286		11.5	11.822	-0.322		11.187	10.562	6.687	11.271	9.847	7.502		11.437	10.062	8.125	11.273	9.906	7.963		11.437	9.687	7	11.269	9.852	7.572		11.625	11.812	11.562	11.426	11.67	11.825
11.4194	7.5	0	0	0		7.5	7	7.187	6.875	0.625			11.4194	11.284	0.135429		11.5	11.821	-0.321		11.187	10.562	6.625	11.271	9.847	7.497		11.437	10.062	8.125	11.273	9.906	7.96		11.437	9.687	7.062	11.268	9.851	7.568		11.625	11.812	11.5	11.426	11.67	11.825
11.4194	7.5	0	0	0		7.5	7	7.187	6.875	0.625			11.4194	11.283	0.136429		11.5	11.821	-0.321		11.187	10.562	6.687	11.27	9.847	7.492		11.5	10.062	8.125	11.272	9.906	7.956		11.437	9.687	7.062	11.268	9.851	7.563		11.625	11.812	11.562	11.426	11.67	11.825
[truncated: 28,173 more rows]

## Sheet: Stat_m
							Max	0.05	13.042	5.584	6.402																	2.884	1.765	6.476															1.353	1.468	0.795
[truncated: 29,747 more rows]
[truncated: 75 more columns]

## Sheet: Stat_h
									Max	8.71167	4.14547	3.34317	1.02606													0	0	0												0	0	0
[truncated: 506 more rows]
[truncated: 54 more columns]

[truncated: 1 more sheets: Tabelle5]
